# Supplementary material for: Measurement of Fe emission spectrum from 170 nm to 600 nm with a coma-free spectrometer
Source: Royal Society of Chemistry journal article supplement (doi:10.1039/d3ja00342f), 2024-01-01
Supplement: d3ja00342f1.pdf [file d3ja00342f1.pdf]

ESI 1. The measured 1356 spectral lines of the Fe atom in the 170-600 nm wavelength region, comparing to that shown in the reference.

| No. | Wavelength (nm) | Intensity (a.u.) | Wavelength (nm), Ref. | Type  | Lower energy level     | Higher energy level     | Reference |
|-----|-----------------|------------------|-----------------------|-------|------------------------|-------------------------|-----------|
| 1   | 170.559         | 91               | 170.5443              | Fe II | $3d^6(^3F1)4s$         | $3d^5(^2F1)4s4p(^3P^o)$ | [1]       |
| 2   | 170.667         | 25               | 170.6676              | Fe II | $3d^6(^5D)4s$          | $3d^6(^3F2)4p$          | [1]       |
| 3   | 172.063         | 21               | 172.061363            | Fe II | $3d^7$                 | $3d^6(^3H)4p$           | [1]       |
| 4   | 173.206         | 20               | 173.19623             | Fe II | $3d^6(^5D)4p$          | $3d^6(^5D)5d$           | [1]       |
| 5   | 173.279         | 20               | 173.28703             | Fe II | $3d^54s^2$             | $3d^6(^3F2)5p$          | [1]       |
| 6   | 174.241         | 17               | 174.25542             | Fe II | $3d^6(^3F1)4s$         | $3d^6(^5D)6p$           | [1]       |
| 7   | 176.191         | 41               | 176.2037              | Fe I  | $3d^64s^2$             | $3d^64s(^6D)6p$         | [2]       |
| 8   | 177.177         | 51               | 177.1893              | Fe II | $3d^54s^2$             | $3d^6(^3H)5p$           | [1]       |
| 9   | 177.454         | 39               | 177.44655             | Fe II | $3d^54s^2$             | $3d^6(^5D_2)5f$         | [1]       |
| 10  | 177.647         | 25               | 177.6418              | Fe II | $3d^54s^2$             | $3d^6(^3F2)5p$          | [1]       |
| 11  | 178.585         | 21               | 178.5921              | Fe II | $3d^6(^5D)4s$          | $3d^6(^3F2)4p$          | [1]       |
| 12  | 180.426         | 55               | 180.41653             | Fe II | $3d^6(^5D)4p$          | $3d^6(^5D)6s$           | [1]       |
| 13  | 180.583         | 69               | 180.5716              | Fe II | $3d^6(^3D)4s$          | $3d^6(^3P1)4p$          | [1]       |
| 14  | 181.606         | 20               | 181.6086              | Fe II | $3d^6(^5D)4p$          | $3d^6(^5D)6s$           | [1]       |
| 15  | 183.182         | 21               | 183.17545             | Fe II | $3d^6(^5D)4s$          | $3d^6(^3F2)4p$          | [1]       |
| 16  | 183.723         | 18               | 183.7114              | Fe II | $3d^6(^1D2)4s$         | $3d^6(^3F1)4p$          | [1]       |
| 17  | 183.82          | 28               | 183.8056              | Fe II | $3d^6(^3H)4p$          | $3d^6(^3D)4d$           | [1]       |
| 18  | 184.445         | 48               | 184.431035            | Fe II | $3d^5(^6S)4s4p(^3P^o)$ | $3d^54s(^7S)4d$         | [1]       |
| 19  | 184.927         | 32               | 184.938315            | Fe II | $3d^5(^6S)4s4p(^3P^o)$ | $3d^54s(^7S)4d$         | [1]       |
| 20  | 185.011         | 23               | 185.0215              | Fe II | $3d^6(^3D)4s$          | $3d^6(^5D)5p$           | [1]       |
| 21  | 185.119         | 18               | 185.1248              | Fe I  | $3d^64s^2$             | $3d^7(^4F)5p$           | [2]       |
| 22  | 185.288         | 30               | 185.30283             | Fe II | $3d^54s^2$             | $3d^5(^2F1)4s4p(^3P^o)$ | [1]       |
| 23  | 187.261         | 86               | 187.264216            | Fe II | $3d^54s^2$             | $3d^5(^2F1)4s4p(^3P^o)$ | [1]       |
| 24  | 187.345         | 20               | 187.3363              | Fe II | $3d^54s^2$             | $3d^6(^5D)6p$           | [1]       |
| 25  | 187.393         | 24               | 187.3854              | Fe II | $3d^6(^3H)4p$          | $3d^6(^5D)6d$           | [1]       |
| 26  | 187.658         | 64               | 187.65585             | Fe II | $3d^54s^2$             | $3d^6(^5D)6p$           | [1]       |
| 27  | 188.609         | 38               | 188.59876             | Fe II | $3d^54s^2$             | $3d^5(^2F1)4s4p(^3P^o)$ | [1]       |
| 28  | 188.91          | 161              | 188.9026              | Fe II | $3d^6(^3H)4p$          | $3d^6(^5D)6d$           | [1]       |
| 29  | 189.03          | 31               | 189.0256              | Fe II | $3d^7$                 | $3d^6(^3G)4p$           | [1]       |
| 30  | 189.054         | 26               | 189.064143            | Fe II | $3d^54s^2$             | $3d^6(^5D)6p$           | [1]       |
| 31  | 189.162         | 19               | 189.17438             | Fe I  | $3d^64s^2$             | $3d^6(^3G)4s4p(^3P^o)$  | [2]       |
| 32  | 189.355         | 27               | 189.3636              | Fe II | $3d^5(^6S)4s4p(^3P^o)$ | $3d^6(^5D)6d$           | [1]       |
| 33  | 189.86          | 22               | 189.8537              | Fe II | $3d^7$                 | $3d^6(^3D)4p$           | [1]       |

| No. | Wavelength (nm) | Intensity (a.u.) | Wavelength (nm), Ref. | Type  | Lower energy level | Higher energy level     | Reference |
|-----|-----------------|------------------|-----------------------|-------|--------------------|-------------------------|-----------|
| 34  | 190.859         | 30               | 190.8681              | Fe II | $3d^54s^2$         | $3d^5(^4F)4s4p(^3P^o)$  | [1]       |
| 35  | 191.617         | 55               | 191.61323             | Fe II | $3d^6(^5D)4s$      | $3d^6(^3P2)4p$          | [1]       |
| 36  | 192.24          | 62               | 192.2273              | Fe II | $3d^6(^3H)4s$      | $3d^6(^1I)4p$           | [1]       |
| 37  | 192.415         | 31               | 192.422               | Fe I  | $3d^64s^2$         | $3d^7(^2P)4p$           | [2]       |
| 38  | 193.457         | 45               | 193.4535              | Fe I  | $3d^64s^2$         | $3d^6(^5D)4s(^6D)5p$    | [2]       |
| 39  | 193.888         | 24               | 193.87719             | Fe II | $3d^6(^3P1)4s$     | $3d^5(^4F)4s4p(^3P^o)$  | [1]       |
| 40  | 195.489         | 32               | 195.4866              | Fe II | $3d^6(^3F2)4p$     | $3d^6(^3D)4d$           | [1]       |
| 41  | 196.021         | 22               | 196.01439             | Fe I  | $3d^64s^2$         | $3d^6(^5D)4s(^6D)5p$    | [2]       |
| 42  | 196.227         | 25               | 196.227911            | Fe II | $3d^54s^2$         | $3d^6(^3P2)5p$          | [1]       |
| 43  | 196.359         | 25               | 196.36336             | Fe I  | $3d^64s^2$         | $3d^6(^5D)4s(^6D)5p$    | [2]       |
| 44  | 197.246         | 32               | 197.24426             | Fe II | $3d^54s^2$         | $3d^5(^4F)4s4p(^3P^o)$  | [1]       |
| 45  | 197.497         | 26               | 197.48326             | Fe II | $3d^54s^2$         | $3d^5(^4F)4s4p(^3P^o)$  | [1]       |
| 46  | 197.889         | 39               | 197.8918              | Fe II | $3d^7$             | $3d^6(^3G)4p$           | [1]       |
| 47  | 198.646         | 20               | 198.64176             | Fe II | $3d^6(^3P2)4s$     | $3d^6(^1S2)4p$          | [1]       |
| 48  | 198.764         | 26               | 198.7514              | Fe II | $3d^6(^3H)4p$      | $3d^6(^5D)7s$           | [1]       |
| 49  | 198.976         | 23               | 198.9766              | Fe II | $3d^54s^2$         | $3d^6(^5D)6p$           | [1]       |
| 50  | 199.351         | 47               | 199.35721             | Fe II | $3d^54s^2$         | $3d^6(^5D)6p$           | [1]       |
| 51  | 200.828         | 45               | 200.8233              | Fe I  | $3d^7(^4F)4s$      | $3d^64s(^6D)6p$         | [2]       |
| 52  | 202.827         | 54               | 202.8198              | Fe II | $3d^7$             | $3d^6(^3P2)4p$          | [1]       |
| 53  | 203.053         | 33               | 203.0644              | Fe II | $3d^6(^3F2)4s$     | $3d^6(^3D)4p$           | [1]       |
| 54  | 203.896         | 33               | 203.9106              | Fe II | $3d^6(^3F2)4s$     | $3d^6(^3D)4p$           | [1]       |
| 55  | 205.229         | 50               | 205.2287              | Fe II | $3d^6(^3P2)4s$     | $3d^6(^3D)4p$           | [1]       |
| 56  | 205.296         | 31               | 205.2853              | Fe II | $3d^7$             | $3d^5(^5S)4s4p(^3P^o)$  | [1]       |
| 57  | 205.747         | 27               | 205.73325             | Fe II | $3d^7$             | $3d^6(^3F2)4p$          | [1]       |
| 58  | 205.867         | 208              | 205.8577              | Fe II | $3d^6(^3F2)4p$     | $3d^6(^5D)7s$           | [1]       |
| 59  | 206.555         | 29               | 206.56889             | Fe II | $3d^54s^2$         | $3d^5(^2F1)4s4p(^3P^o)$ | [1]       |
| 60  | 206.826         | 192              | 206.8319              | Fe II | $3d^6(^1D2)4s$     | $3d^6(^1F)4p$           | [1]       |
| 61  | 207.345         | 51               | 207.3525              | Fe II | $3d^6(^3F1)4s$     | $3d^5(^4D)4s4p(^3P^o)$  | [1]       |
| 62  | 207.754         | 26               | 207.75029             | Fe I  | $3d^7(^4F)4s$      | $3d^6(^3F2)4s4p(^1P^o)$ | [2]       |
| 63  | 207.957         | 95               | 207.94912             | Fe II | $3d^54s^2$         | $3d^5(^2F1)4s4p(^3P^o)$ | [1]       |
| 64  | 208.139         | 34               | 208.1295              | Fe II | $3d^7$             | $3d^6(^3F2)4p$          | [1]       |
| 65  | 208.851         | 29               | 208.8631              | Fe II | $3d^6(^3G)4p$      | $3d^6(^5D)6d$           | [1]       |
| 66  | 208.894         | 282              | 208.8837              | Fe II | $3d^7$             | $3d^6(^3P2)4p$          | [1]       |
| 67  | 209.19          | 125              | 209.20126             | Fe II | $3d^6(^3H)4p$      | $3d^6(^3G)4d$           | [1]       |
| 68  | 209.453         | 52               | 209.46335             | Fe II | $3d^7$             | $3d^6(^3G)4p$           | [1]       |

| No. | Wavelength (nm) | Intensity (a.u.) | Wavelength (nm), Ref. | Type  | Lower energy level | Higher energy level     | Reference |
|-----|-----------------|------------------|-----------------------|-------|--------------------|-------------------------|-----------|
| 69  | 211.817         | 20               | 211.81974             | Fe II | $3d^7$             | $3d^6(^3G)4p$           | [1]       |
| 70  | 212.509         | 23               | 212.51681             | Fe II | $3d^7$             | $3d^6(^3F1)4p$          | [1]       |
| 71  | 214.035         | 31               | 214.02894             | Fe II | $3d^6(^3F2)4p$     | $3d^6(^3G)4d$           | [1]       |
| 72  | 214.107         | 25               | 214.10858             | Fe I  | $3d^64s^2$         | $3d^6(^3H)4s4p(^3P^o)$  | [2]       |
| 73  | 214.131         | 22               | 214.145               | Fe II | $3d^6(^3F2)4p$     | $3d^6(^3G)4d$           | [1]       |
| 74  | 215.011         | 24               | 215.01847             | Fe I  | $3d^64s^2$         | $3d^6(^3F2)4s4p(^3P^o)$ | [2]       |
| 75  | 215.168         | 75               | 215.16953             | Fe I  | $3d^7(^4F)4s$      | $3d^7(^4F)5p$           | [2]       |
| 76  | 215.481         | 46               | 215.47561             | Fe II | $3d^6(^3P2)4p$     | $3d^6(^5D)5d$           | [1]       |
| 77  | 215.71          | 24               | 215.72446             | Fe II | $3d^6(^3F2)4p$     | $3d^6(^3G)4d$           | [1]       |
| 78  | 216.156         | 34               | 216.1579              | Fe I  | $3d^64s^2$         | $3d^7(^4P)4p$           | [2]       |
| 79  | 216.409         | 28               | 216.4038              | Fe II | $3d^6(^1D2)4s$     | $3d^6(^1F)4p$           | [1]       |
| 80  | 218.651         | 378              | 218.64868             | Fe I  | $3d^64s^2$         | $3d^7(^4P)4p$           | [2]       |
| 81  | 219.108         | 32               | 219.12042             | Fe I  | $3d^64s^2$         | $3d^6(^3P2)4s4p(^3P^o)$ | [2]       |
| 82  | 219.181         | 282              | 219.18389             | Fe I  | $3d^64s^2$         | $3d^7(^4P)4p$           | [2]       |
| 83  | 219.602         | 167              | 219.60418             | Fe I  | $3d^64s^2$         | $3d^7(^4P)4p$           | [2]       |
| 84  | 220.699         | 45               | 220.70684             | Fe I  | $3d^64s^2$         | $3d^6(^3H)4s4p(^3P^o)$  | [2]       |
| 85  | 221.591         | 41               | 221.6                 | Fe II | $3d^7$             | $3d^6(^3H)4p$           | [1]       |
| 86  | 221.699         | 21               | 221.70608             | Fe II | $3d^6(^3H)4s$      | $3d^6(^3G)4p$           | [1]       |
| 87  | 221.723         | 29               | 221.73238             | Fe II | $3d^6(^3H)4p$      | $3d^6(^3F2)4d$          | [1]       |
| 88  | 222.012         | 33               | 221.998               | Fe II | $3d^6(^3F2)4s$     | $3d^6(^3D)4p$           | [1]       |
| 89  | 222.771         | 30               | 222.76128             | Fe II | $3d^6(^3H)4s$      | $3d^6(^3G)4p$           | [1]       |
| 90  | 222.94          | 22               | 222.92801             | Fe II | $3d^6(^3P2)4p$     | $3d^6(^3H)4d$           | [1]       |
| 91  | 223.988         | 46               | 223.98044             | Fe II | $3d^6(^3H)4p$      | $3d^6(^3F2)4d$          | [1]       |
| 92  | 224.073         | 26               | 224.06297             | Fe I  | $3d^7(^4F)4s$      | $3d^6(^1G2)4s4p(^3P^o)$ | [2]       |
| 93  | 224.278         | 42               | 224.27807             | Fe I  | $3d^64s^2$         | $3d^6(^3P2)4s4p(^3P^o)$ | [2]       |
| 94  | 225.145         | 31               | 225.15542             | Fe II | $3d^6(^5D)4s$      | $3d^6(^5D)4p$           | [1]       |
| 95  | 228.494         | 36               | 228.4877              | Fe II | $3d^6(^3H)4p$      | $3d^6(^3H)4d$           | [1]       |
| 96  | 230.362         | 79               | 230.35805             | Fe I  | $3d^64s^2$         | $3d^6(^3F2)4s4p(^3P^o)$ | [2]       |
| 97  | 230.831         | 29               | 230.82953             | Fe II | $3d^6(^3F2)4p$     | $3d^6(^3F2)4d$          | [1]       |
| 98  | 232.421         | 63               | 232.40818             | Fe II | $3d^6(^3P2)4p$     | $3d^6(^3P2)4d$          | [1]       |
| 99  | 232.699         | 39               | 232.7006              | Fe II | $3d^6(^3P2)4p$     | $3d^6(^3F2)4d$          | [1]       |
| 100 | 233.132         | 107              | 233.13081             | Fe II | $3d^7$             | $3d^6(^5D)4p$           | [1]       |
| 101 | 234.349         | 1773             | 234.34948             | Fe II | $3d^6(^5D)4s$      | $3d^6(^5D)4p$           | [1]       |
| 102 | 234.831         | 520              | 234.830221            | Fe II | $3d^6(^5D)4s$      | $3d^6(^5D)4p$           | [1]       |
| 103 | 235.12          | 60               | 235.12007             | Fe II | $3d^6(^3H)4s$      | $3d^6(^3F2)4p$          | [1]       |

| No. | Wavelength (nm) | Intensity (a.u.) | Wavelength (nm), Ref. | Type  | Lower energy level           | Higher energy level          | Reference |
|-----|-----------------|------------------|-----------------------|-------|------------------------------|------------------------------|-----------|
| 104 | 235.3           | 24               | 235.30237             | Fe II | $3d^6(^3G)4p$                | $3d^6(^3G)4d$                | [1]       |
| 105 | 235.842         | 28               | 235.8516              | Fe II | $3d^6(^3H)4p$                | $3d^6(^3H)4d$                | [1]       |
| 106 | 235.939         | 138              | 235.94961             | Fe II | $3d^6(^3D)4p$                | $3d^6(^5D)6d$                | [1]       |
| 107 | 236.921         | 74               | 236.9237              | Fe II | $3d^6(^3F)4s$                | $3d^6(^3F)4p$                | [1]       |
| 108 | 237.043         | 41               | 237.049867            | Fe II | $3d^7$                       | $3d^6(^5D)4p$                | [1]       |
| 109 | 237.115         | 74               | 237.11746             | Fe II | $3d^6(^3G)4p$                | $3d^6(^3G)4d$                | [1]       |
| 110 | 238.534         | 156              | 238.5382              | Fe II | $3d^6(^3P)4p$                | $3d^6(^3P)4d$                | [1]       |
| 111 | 240.472         | 1545             | 240.4639              | Fe I  | $3d^7(^4F)4s$                | $3d^7(^4F)5p$                | [2]       |
| 112 | 240.92          | 59               | 240.9296              | Fe II | $3d^6(^3G)4p$                | $3d^6(^3F)4d$                | [1]       |
| 113 | 240.98          | 49               | 240.985873            | Fe II | $3d^6(^3F)4p$                | $3d^6(^3F)4d$                | [1]       |
| 114 | 241.319         | 248              | 241.33101             | Fe II | $3d^6(^5D)4s$                | $3d^6(^5D)4p$                | [1]       |
| 115 | 242.348         | 30               | 242.34993             | Fe II | $3d^6(^3F)4p$                | $3d^6(^3F)4d$                | [1]       |
| 116 | 243.219         | 96               | 243.226088            | Fe II | $3d^6(^3F)4s$                | $3d^6(^3F)4p$                | [1]       |
| 117 | 243.557         | 34               | 243.5608              | Fe II | $3d^6(^3F)4p$                | $3d^6(^3F)4d$                | [1]       |
| 118 | 243.823         | 56               | 243.81824             | Fe I  | $3d^7(^4F)4s$                | $3d^6(^3G)4s4p(^3P^{\circ})$ | [2]       |
| 119 | 244.016         | 89               | 244.01096             | Fe I  | $3d^64s^2$                   | $3d^6(^3H)4s4p(^1P^{\circ})$ | [2]       |
| 120 | 244.56          | 138              | 244.55729             | Fe II | $3d^6(^3P)4s$                | $3d^6(^3P)4p$                | [1]       |
| 121 | 246.131         | 173              | 246.128325            | Fe II | $3d^6(^3G)4s$                | $3d^6(^3G)4p$                | [1]       |
| 122 | 246.191         | 288              | 246.186072            | Fe II | $3d^6(^3G)4s$                | $3d^6(^3G)4p$                | [1]       |
| 123 | 247.869         | 82               | 247.857194            | Fe II | $3d^6(^3F)4s$                | $3d^6(^3F)4p$                | [1]       |
| 124 | 248.146         | 71               | 248.15782             | Fe II | $3d^6(^1G)4s$                | $3d^6(^1I)4p$                | [1]       |
| 125 | 248.653         | 1203             | 248.6493              | Fe II | $3d^6(^1I)4p$                | $3d^6(^5D)6d$                | [1]       |
| 126 | 250.799         | 634              | 250.79001             | Fe I  | $3d^7(^4F)4s$                | $3d^6(^3G)4s4p(^3P^{\circ})$ | [2]       |
| 127 | 251.1           | 3755             | 251.1026              | Fe I  | $3d^6(^5D)4s4p(^3P^{\circ})$ | $3d^64s(^6D_{7/2})6d$        | [2]       |
| 128 | 251.823         | 3715             | 251.81015             | Fe I  | $3d^64s^2$                   | $3d^6(^5D)4s4p(^1P^{\circ})$ | [2]       |
| 129 | 252.376         | 485              | 252.3661              | Fe I  | $3d^64s^2$                   | $3d^6(^3F)4s4p(^1P^{\circ})$ | [2]       |
| 130 | 253.303         | 166              | 253.31414             | Fe I  | $3d^64s^2$                   | $3d^6(^3H)4s4p(^1P^{\circ})$ | [2]       |
| 131 | 253.568         | 1666             | 253.56068             | Fe I  | $3d^64s^2$                   | $3d^6(^5D)4s4p(^1P^{\circ})$ | [2]       |
| 132 | 254.747         | 37               | 254.733807            | Fe II | $3d^6(^3H)4s$                | $3d^6(^3H)4p$                | [1]       |
| 133 | 255.084         | 106              | 255.0811              | Fe I  | $3d^7(^4F)4s$                | $3d^7(^4P)4p$                | [2]       |
| 134 | 255.42          | 38               | 255.4071              | Fe I  | $3d^6(^5D)4s4p(^3P^{\circ})$ | $3d^64s(^4D)4d$              | [2]       |
| 135 | 257.583         | 96               | 257.57451             | Fe I  | $3d^64s^2$                   | $3d^6(^3H)4s4p(^1P^{\circ})$ | [2]       |
| 136 | 257.619         | 57               | 257.6045              | Fe II | $3d^6(^3G)4p$                | $3d^6(^3F)4d$                | [1]       |
| 137 | 258.155         | 70               | 258.1626              | Fe II | $3d^6(^5D)4d$                | $3d^6(^3H_5)4f$              | [1]       |
| 138 | 258.264         | 129              | 258.258297            | Fe II | $3d^6(^5D)4s$                | $3d^6(^5D)4p$                | [1]       |

| No. | Wavelength (nm) | Intensity (a.u.) | Wavelength (nm), Ref. | Type  | Lower energy level     | Higher energy level      | Reference |
|-----|-----------------|------------------|-----------------------|-------|------------------------|--------------------------|-----------|
| 139 | 258.927         | 27               | 258.9123              | Fe II | $3d^6(^3D)4p$          | $3d^6(^5D)6d$            | [1]       |
| 140 | 259.156         | 94               | 259.154258            | Fe II | $3d^6(^5D)4s$          | $3d^6(^5D)4p$            | [1]       |
| 141 | 259.289         | 79               | 259.278411            | Fe II | $3d^6(^1I)4s$          | $3d^6(^1I)4p$            | [1]       |
| 142 | 259.844         | 554              | 259.836894            | Fe II | $3d^6(^5D)4s$          | $3d^6(^5D)4p$            | [1]       |
| 143 | 260.519         | 46               | 260.531027            | Fe II | $3d^6(^3D)4s$          | $3d^6(^3D)4p$            | [1]       |
| 144 | 260.688         | 1032             | 260.68261             | Fe I  | $3d^7(^4F)4s$          | $3d^6(^3F_2)4s4p(^3P^o)$ | [2]       |
| 145 | 260.965         | 29               | 260.9697              | Fe II | $3d^6(^3F_2)4p$        | $3d^6(^5D)6s$            | [1]       |
| 146 | 261.194         | 870              | 261.187336            | Fe II | $3d^6(^5D)4s$          | $3d^6(^5D)4p$            | [1]       |
| 147 | 261.809         | 135              | 261.80179             | Fe I  | $3d^7(^4F)4s$          | $3d^6(^3F_2)4s4p(^3P^o)$ | [2]       |
| 148 | 262.171         | 50               | 262.166881            | Fe II | $3d^6(^5D)4s$          | $3d^6(^5D)4p$            | [1]       |
| 149 | 262.568         | 252              | 262.566685            | Fe II | $3d^6(^5D)4s$          | $3d^6(^5D)4p$            | [1]       |
| 150 | 263.002         | 44               | 263.007118            | Fe II | $3d^6(^3F_2)4s$        | $3d^6(^3H)4p$            | [1]       |
| 151 | 263.219         | 189              | 263.22375             | Fe I  | $3d^7(^4F)4s$          | $3d^6(^3F_2)4s4p(^3P^o)$ | [2]       |
| 152 | 263.279         | 38               | 263.2708              | Fe II | $3d^6(^5D)4d$          | $3d^6(^3H_4)4f$          | [1]       |
| 153 | 263.533         | 33               | 263.54001             | Fe II | $3d^6(^3H)4s$          | $3d^6(^3F_2)4p$          | [1]       |
| 154 | 263.798         | 73               | 263.7865              | Fe II | $3d^5 4s^2$            | $3d^6(^3F_1)4p$          | [1]       |
| 155 | 264.28          | 43               | 264.276               | Fe II | $3d^6(^5D)4d$          | $3d^6(^3P_2)4f$          | [1]       |
| 156 | 264.822         | 46               | 264.8165              | Fe I  | $3d^7(^4F)4s$          | $3d^7(^2G)4p$            | [2]       |
| 157 | 265.533         | 159              | 265.5364              | Fe II | $3d^6(^5D)4p$          | $3d^6(^5D)5s$            | [1]       |
| 158 | 265.702         | 33               | 265.71698             | Fe II | $3d^6(^3F_2)4p$        | $3d^6(^3F_2)5s$          | [1]       |
| 159 | 265.774         | 30               | 265.78619             | Fe II | $3d^6(^1G_1)4s$        | $3d^6(^4G)4s4p(^3P^o)$   | [1]       |
| 160 | 265.967         | 151              | 265.9664              | Fe II | $3d^6(^3G)4p$          | $3d^6(^3H)4d$            | [1]       |
| 161 | 267.135         | 151              | 267.13918             | Fe II | $3d^6(^5D)4p$          | $3d^6(^5D)4d$            | [1]       |
| 162 | 267.677         | 39               | 267.68793             | Fe II | $3d^6(^3F_1)4s$        | $3d^6(^3P_1)4p$          | [1]       |
| 163 | 267.797         | 51               | 267.78287             | Fe II | $3d^6(^3G)4p$          | $3d^6(^3H)4d$            | [1]       |
| 164 | 268.749         | 18               | 268.74141             | Fe I  | $3d^6(^5D)4s4p(^3P^o)$ | $3d^6 4s(^6D)5d$         | [2]       |
| 165 | 269.243         | 118              | 269.25175             | Fe II | $3d^6(^3G)4p$          | $3d^6(^3G)5s$            | [1]       |
| 166 | 269.459         | 46               | 269.45357             | Fe I  | $3d^6(^5D)4s4p(^3P^o)$ | $3d^6 4s(^6D)5d$         | [2]       |
| 167 | 270.097         | 37               | 270.11044             | Fe II | $3d^5(^6S)4s4p(^1P^o)$ | $3d^5 4s(^5S)4d$         | [1]       |
| 168 | 270.362         | 248              | 270.3763              | Fe II | $3d^6(^3D)4p$          | $3d^6(^3G)4d$            | [1]       |
| 169 | 270.832         | 29               | 270.84168             | Fe II | $3d^6(^3H)4p$          | $3d^6(^3F_2)5s$          | [1]       |
| 170 | 271.169         | 135              | 271.1655              | Fe I  | $3d^7(^4F)4s$          | $3d^6(^3F_2)4s4p(^3P^o)$ | [2]       |
| 171 | 271.446         | 74               | 271.441261            | Fe II | $3d^6(^5D)4s$          | $3d^6(^5D)4p$            | [1]       |
| 172 | 271.831         | 341              | 271.84361             | Fe I  | $3d^7(^4F)4s$          | $3d^6(^3F_2)4s4p(^3P^o)$ | [2]       |
| 173 | 273.095         | 34               | 273.09818             | Fe I  | $3d^7(^4F)4s$          | $3d^6(^3F_2)4s4p(^3P^o)$ | [2]       |

| No. | Wavelength (nm) | Intensity (a.u.) | Wavelength (nm), Ref. | Type  | Lower energy level     | Higher energy level      | Reference |
|-----|-----------------|------------------|-----------------------|-------|------------------------|--------------------------|-----------|
| 174 | 274.358         | 133              | 274.35652             | Fe I  | $3d^7(^4F)4s$          | $3d^6(^3F_2)4s4p(^3P^o)$ | [2]       |
| 175 | 275.273         | 22               | 275.2765              | Fe II | $3d^6(^3G)4p$          | $3d^6(^5D)6s$            | [1]       |
| 176 | 276.199         | 176              | 276.20264             | Fe I  | $3d^7(^4F)4s$          | $3d^6(^3P_2)4s4p(^3P^o)$ | [2]       |
| 177 | 276.307         | 99               | 276.31094             | Fe I  | $3d^7(^4F)4s$          | $3d^6(^3F_2)4s4p(^3P^o)$ | [2]       |
| 178 | 276.62          | 54               | 276.6193              | Fe II | $3d^6(^1G_2)4s$        | $3d^6(^3G)4p$            | [1]       |
| 179 | 276.692         | 52               | 276.69089             | Fe I  | $3d^7(^4F)4s$          | $3d^6(^3F_2)4s4p(^3P^o)$ | [2]       |
| 180 | 276.897         | 29               | 276.89343             | Fe II | $3d^6(^5D)4s$          | $3d^6(^5D)4p$            | [1]       |
| 181 | 277.354         | 69               | 277.36604             | Fe II | $3d^6(^3D)4p$          | $3d^6(^3D)5s$            | [1]       |
| 182 | 277.931         | 47               | 277.92998             | Fe II | $3d^6(^3H)4s$          | $3d^6(^3H)4p$            | [1]       |
| 183 | 279.001         | 30               | 279.00452             | Fe II | $3d^6(^3F_2)4p$        | $3d^6(^3F_2)5s$          | [1]       |
| 184 | 279.133         | 29               | 279.1297              | Fe II | $3d^6(^1F)4p$          | $3d^6(^3H)6s$            | [1]       |
| 185 | 279.314         | 25               | 279.32418             | Fe II | $3d^6(^3D)4s$          | $3d^6(^3D)4p$            | [1]       |
| 186 | 279.362         | 29               | 279.3708              | Fe II | $3d^5 4s^2$            | $3d^6(^3F_1)4p$          | [1]       |
| 187 | 279.422         | 91               | 279.4143              | Fe I  | $3d^7(^4P)4s$          | $3d^7(^4F)5p$            | [2]       |
| 188 | 280.264         | 61               | 280.2601              | Fe II | $3d^6(^3G)4s$          | $3d^6(^3P_2)4p$          | [1]       |
| 189 | 280.456         | 656              | 280.45201             | Fe I  | $3d^7(^4F)4s$          | $3d^6(^3H)4s4p(^3P^o)$   | [2]       |
| 190 | 280.946         | 181              | 280.9435              | Fe II | $3d^6(^3G)4p$          | $3d^6(^3P_2)4d$          | [1]       |
| 191 | 281.329         | 8769             | 281.32863             | Fe I  | $3d^7(^4F)4s$          | $3d^6(^3H)4s4p(^3P^o)$   | [2]       |
| 192 | 281.389         | 27               | 281.4006              | Fe II | $3d^5(^6S)4s4p(^3P^o)$ | $3d^6(^5D)5d$            | [1]       |
| 193 | 281.461         | 55               | 281.4702              | Fe II | $3d^6(^3D)4s$          | $3d^6(^3F_2)4p$          | [1]       |
| 194 | 281.58          | 25               | 281.584               | Fe I  | $3d^7(^4P)4s$          | $3d^7(^2D_2)4p$          | [2]       |
| 195 | 281.748         | 38               | 281.75036             | Fe I  | $3d^7(^4F)4s$          | $3d^6(^3H)4s4p(^3P^o)$   | [2]       |
| 196 | 282.262         | 154              | 282.2673              | Fe II | $3d^6(^3H)4s$          | $3d^6(^3H)4p$            | [1]       |
| 197 | 282.358         | 40               | 282.3511              | Fe I  | $3d^6 4s^2$            | $3d^7(^4F)5p$            | [2]       |
| 198 | 283.159         | 72               | 283.15608             | Fe II | $3d^6(^3P_2)4s$        | $3d^6(^3P_2)4p$          | [1]       |
| 199 | 283.494         | 48               | 283.5007              | Fe II | $3d^6(^3F_2)4p$        | $3d^6(^3F_2)5s$          | [1]       |
| 200 | 283.949         | 80               | 283.951279            | Fe II | $3d^6(^5D)4p$          | $3d^6(^5D)5s$            | [1]       |
| 201 | 284.451         | 66               | 284.4413              | Fe I  | $3d^6 4s^2$            | $3d^7(^4F_{7/2})4f$      | [2]       |
| 202 | 284.929         | 33               | 284.91697             | Fe II | $3d^6(^3P_2)4p$        | $3d^6(^3P_2)5s$          | [1]       |
| 203 | 285.108         | 28               | 285.093               | Fe II | $3d^6(^3G)4p$          | $3d^6(^3F_2)4d$          | [1]       |
| 204 | 285.694         | 55               | 285.69088             | Fe II | $3d^6(^5D)4p$          | $3d^6(^5D)5s$            | [1]       |
| 205 | 285.742         | 149              | 285.7419              | Fe II | $3d^6(^3G)4s$          | $3d^6(^3H)4p$            | [1]       |
| 206 | 286.256         | 26               | 286.24945             | Fe I  | $3d^7(^4F)4s$          | $3d^6(^3P_2)4s4p(^3P^o)$ | [2]       |
| 207 | 286.34          | 66               | 286.34298             | Fe I  | $3d^7(^4F)4s$          | $3d^6(^3F_2)4s4p(^3P^o)$ | [2]       |
| 208 | 286.519         | 32               | 286.5253              | Fe II | $3d^6(^1D_2)4s$        | $3d^6(^1G_2)4p$          | [1]       |

| No. | Wavelength (nm) | Intensity (a.u.) | Wavelength (nm), Ref. | Type  | Lower energy level           | Higher energy level            | Reference |
|-----|-----------------|------------------|-----------------------|-------|------------------------------|--------------------------------|-----------|
| 209 | 286.674         | 62               | 286.66247             | Fe I  | $3d^7(^4F)4s$                | $3d^6(^3P_2)4s4p(^3P^{\circ})$ | [2]       |
| 210 | 286.734         | 22               | 286.73092             | Fe I  | $3d^7(^4F)4s$                | $3d^6(^3F_2)4s4p(^3P^{\circ})$ | [2]       |
| 211 | 287.021         | 67               | 287.00862             | Fe II | $3d^6(^3D)4p$                | $3d^6(^5D)5d$                  | [1]       |
| 212 | 287.415         | 120              | 287.4172              | Fe I  | $3d^64s^2$                   | $3d^7(^4F)4p$                  | [2]       |
| 213 | 287.834         | 36               | 287.8211              | Fe II | $3d^6(^5D)4p$                | $3d^64s^2$                     | [1]       |
| 214 | 288.359         | 21               | 288.37101             | Fe II | $3d^6(^3H)4s$                | $3d^6(^3H)4p$                  | [1]       |
| 215 | 288.479         | 27               | 288.47642             | Fe II | $3d^6(^5D)4p$                | $3d^6(^5D)5s$                  | [1]       |
| 216 | 288.813         | 28               | 288.80956             | Fe II | $3d^6(^3P_2)4s$              | $3d^6(^3P_2)4p$                | [1]       |
| 217 | 289.411         | 25               | 289.4067              | Fe II | $3d^6(^3D)4s$                | $3d^6(^3G)4p$                  | [1]       |
| 218 | 289.458         | 62               | 289.4504              | Fe I  | $3d^64s^2$                   | $3d^7(^2D_2)4p$                | [2]       |
| 219 | 289.566         | 32               | 289.5757              | Fe II | $3d^7$                       | $3d^6(^3G)4p$                  | [1]       |
| 220 | 289.948         | 54               | 289.94144             | Fe I  | $3d^64s^2$                   | $3d^7(^2D_2)4p$                | [2]       |
| 221 | 290.438         | 34               | 290.4373              | Fe II | $3d^6(^3G)4s$                | $3d^6(^3P_2)4p$                | [1]       |
| 222 | 290.987         | 28               | 290.9973              | Fe II | $3d^6(^3F_2)4s$              | $3d^5(^6S)4s4p(^3P^{\circ})$   | [1]       |
| 223 | 291.011         | 51               | 290.9973              | Fe II | $3d^6(^3F_2)4s$              | $3d^5(^6S)4s4p(^3P^{\circ})$   | [1]       |
| 224 | 291.906         | 28               | 291.9085              | Fe II | $3d^6(^3D)4p$                | $3d^6(^3F_2)4d$                | [1]       |
| 225 | 291.93          | 35               | 291.92131             | Fe I  | $3d^6(^5D)4s4p(^3P^{\circ})$ | $3d^64s(^6D)5d$                | [2]       |
| 226 | 292.241         | 26               | 292.23789             | Fe I  | $3d^7(^4F)4s$                | $3d^7(^4P)4p$                  | [2]       |
| 227 | 292.276         | 22               | 292.26232             | Fe I  | $3d^6(^5D)4s4p(^3P^{\circ})$ | $3d^64s(^6D)5d$                | [2]       |
| 228 | 292.384         | 46               | 292.38524             | Fe I  | $3d^7(^2G)4s$                | $3d^7(^2H)4p$                  | [2]       |
| 229 | 292.539         | 45               | 292.53575             | Fe I  | $3d^7(^2G)4s$                | $3d^6(^1I)4s4p(^3P^{\circ})$   | [2]       |
| 230 | 293.017         | 156              | 293.0278              | Fe II | $3d^6(^3D)4p$                | $3d^6(^3F_2)4d$                | [1]       |
| 231 | 293.339         | 19               | 293.3479              | Fe II | $3d^7$                       | $3d^6(^3G)4p$                  | [1]       |
| 232 | 293.78          | 150              | 293.78065             | Fe I  | $3d^6(^5D)4s4p(^3P^{\circ})$ | $3d^64s(^6D)5d$                | [2]       |
| 233 | 294.437         | 42               | 294.439523            | Fe II | $3d^7$                       | $3d^6(^5D)4p$                  | [1]       |
| 234 | 294.628         | 60               | 294.6181              | Fe II | $3d^7$                       | $3d^6(^3G)4p$                  | [1]       |
| 235 | 294.795         | 3687             | 294.78758             | Fe I  | $3d^64s^2$                   | $3d^7(^4F)4p$                  | [2]       |
| 236 | 294.926         | 33               | 294.918121            | Fe II | $3d^6(^3G)4s$                | $3d^6(^3F_2)4p$                | [1]       |
| 237 | 295.021         | 226              | 295.02411             | Fe I  | $3d^6(^5D)4s4p(^3P^{\circ})$ | $3d^64s(^6D)5d$                | [2]       |
| 238 | 295.308         | 177              | 295.2941              | Fe II | $3d^6(^3D)4p$                | $3d^54s(^7S)4d$                | [1]       |
| 239 | 295.463         | 33               | 295.46521             | Fe I  | $3d^64s^2$                   | $3d^7(^2D_2)4p$                | [2]       |
| 240 | 295.57          | 864              | 295.5608              | Fe II | $3d^54s^2$                   | $3d^6(^5D)6p$                  | [1]       |
| 241 | 295.666         | 32               | 295.67012             | Fe I  | $3d^6(^5D)4s4p(^3P^{\circ})$ | $3d^7(^4F)6s$                  | [2]       |
| 242 | 296             | 221              | 295.9992              | Fe I  | $3d^7(^2G)4s$                | $3d^6(^1G_2)4s4p(^3P^{\circ})$ | [2]       |
| 243 | 296.322         | 473              | 296.3304              | Fe I  | $3d^6(^5D)4s4p(^3P^{\circ})$ | $3d^64s(^6D_{3/2})6d$          | [2]       |

| No. | Wavelength (nm) | Intensity (a.u.) | Wavelength (nm), Ref. | Type  | Lower energy level     | Higher energy level      | Reference |
|-----|-----------------|------------------|-----------------------|-------|------------------------|--------------------------|-----------|
| 244 | 297.526         | 34               | 297.5287              | Fe I  | $3d^6 4s^2$            | $3d^7(^4F)5p$            | [2]       |
| 245 | 298.146         | 3720             | 298.14448             | Fe I  | $3d^6 4s^2$            | $3d^6(^5D)4s4p(^3P^o)$   | [2]       |
| 246 | 298.265         | 135              | 298.2514              | Fe II | $3d^6(^3G)4p$          | $3d^6(^3H)4d$            | [1]       |
| 247 | 298.361         | 11739            | 298.35695             | Fe I  | $3d^6 4s^2$            | $3d^7(^4F)4p$            | [2]       |
| 248 | 299.04          | 87               | 299.03913             | Fe I  | $3d^7(^2G)4s$          | $3d^6(^1G_2)4s4p(^3P^o)$ | [2]       |
| 249 | 299.16          | 35               | 299.16312             | Fe I  | $3d^6 4s^2$            | $3d^7(^4F)5p$            | [2]       |
| 250 | 299.565         | 58               | 299.5594              | Fe I  | $3d^6 4s^2$            | $3d^6(^3D)4s4p(^3P^o)$   | [2]       |
| 251 | 299.636         | 32               | 299.63855             | Fe I  | $3d^6 4s^2$            | $3d^7(^2D_2)4p$          | [2]       |
| 252 | 299.708         | 42               | 299.6944              | Fe II | $3d^6(^1G_2)4p$        | $3d^5 4s(^7S)4d$         | [1]       |
| 253 | 299.946         | 6968             | 299.95116             | Fe I  | $3d^7(^4F)4s$          | $3d^6(^5D)4s4p(^1P^o)$   | [2]       |
| 254 | 300.304         | 187              | 300.30305             | Fe I  | $3d^7(^4F)4s$          | $3d^6(^5D)4s4p(^1P^o)$   | [2]       |
| 255 | 301.209         | 41               | 301.2187              | Fe II | $3d^6(^3F_1)4s$        | $3d^6(^4P)4s4p(^3P^o)$   | [1]       |
| 256 | 301.341         | 57               | 301.3489              | Fe I  | $3d^6(^5D)4s4p(^3P^o)$ | $3d^6 4s(^6D_{7/2})6d$   | [2]       |
| 257 | 301.615         | 72               | 301.61845             | Fe I  | $3d^7(^4F)4s$          | $3d^6(^5D)4s4p(^1P^o)$   | [2]       |
| 258 | 301.758         | 360              | 301.7627              | Fe I  | $3d^6 4s^2$            | $3d^7(^4F)4p$            | [2]       |
| 259 | 301.948         | 34               | 301.9378              | Fe II | $3d^6(^3G)4p$          | $3d^6(^3F_2)5s$          | [1]       |
| 260 | 302.109         | 19585            | 302.10725             | Fe I  | $3d^6 4s^2$            | $3d^7(^4F)4p$            | [2]       |
| 261 | 302.157         | 119              | 302.1622              | Fe II | $3d^6(^3G)4p$          | $3d^6(^3G)5s$            | [1]       |
| 262 | 302.217         | 33               | 302.2269              | Fe II | $3d^6(^1I)4p$          | $3d^6(^3H)4d$            | [1]       |
| 263 | 302.407         | 1811             | 302.40324             | Fe I  | $3d^6 4s^2$            | $3d^6(^5D)4s4p(^3P^o)$   | [2]       |
| 264 | 302.586         | 2940             | 302.58422             | Fe I  | $3d^6 4s^2$            | $3d^7(^4F)4p$            | [2]       |
| 265 | 303.016         | 207              | 303.01481             | Fe I  | $3d^6 4s^2$            | $3d^7(^2H)4p$            | [2]       |
| 266 | 304.125         | 79               | 304.1184              | Fe II | $3d^6(^1S_2)4p$        | $3d^5 4s(^7S)4d$         | [1]       |
| 267 | 304.208         | 72               | 304.20194             | Fe I  | $3d^7(^4F)4s$          | $3d^6(^5D)4s4p(^1P^o)$   | [2]       |
| 268 | 304.268         | 151              | 304.26646             | Fe I  | $3d^7(^4F)4s$          | $3d^6(^5D)4s4p(^1P^o)$   | [2]       |
| 269 | 304.387         | 34               | 304.3796              | Fe I  | $3d^6(^5D)4s4p(^3P^o)$ | $3d^6 4s(^6D_{5/2})6d$   | [2]       |
| 270 | 304.507         | 171              | 304.50782             | Fe I  | $3d^7(^4F)4s$          | $3d^5(^6S)4s^2 4p$       | [2]       |
| 271 | 304.554         | 91               | 304.55885             | Fe I  | $3d^6 4s^2$            | $3d^7(^2H)4p$            | [2]       |
| 272 | 304.602         | 25               | 304.6055              | Fe II | $3d^6(^3P_2)4p$        | $3d^6(^3P_2)5s$          | [1]       |
| 273 | 305.305         | 30               | 305.30654             | Fe I  | $3d^6 4s^2$            | $3d^7(^2P)4p$            | [2]       |
| 274 | 305.913         | 13373            | 305.90856             | Fe I  | $3d^6 4s^2$            | $3d^7(^4F)4p$            | [2]       |
| 275 | 306.33          | 29               | 306.3151              | Fe I  | $3d^7(^4P)4s$          | $3d^7(^2P)4p$            | [2]       |
| 276 | 306.545         | 49               | 306.53149             | Fe II | $3d^7$                 | $3d^6(^3F_2)4p$          | [1]       |
| 277 | 307.093         | 123              | 307.0785              | Fe I  | $3d^7(^2D_2)4s$        | $3d^6 4s(^4D)5p$         | [2]       |
| 278 | 307.439         | 37               | 307.44367             | Fe II | $3d^6(^3D)4p$          | $3d^6(^3H)4d$            | [1]       |



| No. | Wavelength (nm) | Intensity (a.u.) | Wavelength (nm), Ref. | Type  | Lower energy level     | Higher energy level     | Reference |
|-----|-----------------|------------------|-----------------------|-------|------------------------|-------------------------|-----------|
| 279 | 307.701         | 43               | 307.7013              | Fe I  | $3d^7(^2G)4s$          | $3d^64s(^6D)6p$         | [2]       |
| 280 | 307.808         | 43               | 307.80155             | Fe I  | $3d^7(^4F)4s$          | $3d^5(^6S)4s^24p$       | [2]       |
| 281 | 307.868         | 81               | 307.868001            | Fe II | $3d^6(^5D)4p$          | $3d^6(^5D)5s$           | [1]       |
| 282 | 308.38          | 367              | 308.37407             | Fe I  | $3d^7(^4F)4s$          | $3d^6(^5D)4s4p(^1P^o)$  | [2]       |
| 283 | 308.57          | 27               | 308.5734              | Fe II | $3d^6(^3F2)4p$         | $3d^6(^3P2)5s$          | [1]       |
| 284 | 309.273         | 128              | 309.27815             | Fe I  | $3d^7(^4F)4s$          | $3d^5(^6S)4s^24p$       | [2]       |
| 285 | 309.511         | 62               | 309.5216              | Fe I  | $3d^6(^5D)4s4p(^3P^o)$ | $3d^64s(^6D)5d$         | [2]       |
| 286 | 309.797         | 145              | 309.7959              | Fe I  | $3d^6(^5D)4s4p(^3P^o)$ | $3d^6(^5D)4p(^3P)$      | [2]       |
| 287 | 310.035         | 593              | 310.03033             | Fe I  | $3d^7(^4F)4s$          | $3d^6(^5D)4s4p(^1P^o)$  | [2]       |
| 288 | 311.035         | 36               | 311.02757             | Fe I  | $3d^6(^5D)4s4p(^3P^o)$ | $3d^64s(^4D)4d$         | [2]       |
| 289 | 311.321         | 24               | 311.3245              | Fe II | $3d^6(^1G2)4p$         | $3d^6(^5D)5d$           | [1]       |
| 290 | 311.928         | 30               | 311.9181              | Fe I  | $3d^6(^5D)4s4p(^3P^o)$ | $3d^64s(^6D_{9/2})6d$   | [2]       |
| 291 | 312.047         | 28               | 312.04351             | Fe I  | $3d^64s^2$             | $3d^7(^2H)4p$           | [2]       |
| 292 | 312.38          | 22               | 312.3725              | Fe II | $3d^54s^2$             | $3d^6(^3P1)4p$          | [1]       |
| 293 | 312.535         | 46               | 312.5269              | Fe I  | $3d^7(^2G)4s$          | $3d^6(^3G)4s4p(^3P^o)$  | [2]       |
| 294 | 314.046         | 31               | 314.03896             | Fe I  | $3d^6(^5D)4s4p(^3P^o)$ | $3d^6(^5D)4s(^4D)4d$    | [2]       |
| 295 | 314.141         | 236              | 314.1512              | Fe I  | $3d^6(^5D)4s4p(^3P^o)$ | $3d^64s(^6D_{9/2})6d$   | [2]       |
| 296 | 314.224         | 42               | 314.2228              | Fe II | $3d^7$                 | $3d^6(^5D)4p$           | [1]       |
| 297 | 314.403         | 97               | 314.39903             | Fe I  | $3d^6(^5D)4s4p(^3P^o)$ | $3d^6(^5D)4s(^4D)4d$    | [2]       |
| 298 | 315.675         | 136              | 315.6894              | Fe I  | $3d^7(^2H)4s$          | $3d^6(^3H)4s4p(^1P^o)$  | [2]       |
| 299 | 316.198         | 49               | 316.19461             | Fe I  | $3d^6(^5D)4s4p(^3P^o)$ | $3d^6(^5D)4s(^6D)4d$    | [2]       |
| 300 | 316.341         | 27               | 316.3372              | Fe I  | $3d^7(^2G)4s$          | $3d^7(^4F)5p$           | [2]       |
| 301 | 316.472         | 149              | 316.4811              | Fe I  | $3d^7(^2G)4s$          | $3d^7(^4F)5p$           | [2]       |
| 302 | 316.567         | 39               | 316.56478             | Fe II | $3d^6(^1G1)4s$         | $3d^6(^3F1)4p$          | [1]       |
| 303 | 316.852         | 63               | 316.852               | Fe I  | $3d^7(^4P)4s$          | $3d^7(^4F)5p$           | [2]       |
| 304 | 317.66          | 35               | 317.6677              | Fe II | $3d^54s^2$             | $3d^5(^4D)4s4p(^3P^o)$  | [1]       |
| 305 | 317.839         | 33               | 317.85362             | Fe I  | $3d^64s^2$             | $3d^6(^1G2)4s4p(^3P^o)$ | [2]       |
| 306 | 318.076         | 144              | 318.07552             | Fe I  | $3d^64s^2$             | $3d^6(^5D)4s4p(^3P^o)$  | [2]       |
| 307 | 318.148         | 21               | 318.15192             | Fe I  | $3d^64s^2$             | $3d^7(^2P)4p$           | [2]       |
| 308 | 318.362         | 25               | 318.35749             | Fe I  | $3d^64s^2$             | $3d^6(^3G)4s4p(^3P^o)$  | [2]       |
| 309 | 318.492         | 658              | 318.48945             | Fe I  | $3d^64s^2$             | $3d^6(^5D)4s4p(^3P^o)$  | [2]       |
| 310 | 318.884         | 123              | 318.88188             | Fe I  | $3d^6(^5D)4s4p(^3P^o)$ | $3d^6(^5D)4s(^6D)4d$    | [2]       |
| 311 | 319.169         | 865              | 319.1659              | Fe I  | $3d^64s^2$             | $3d^6(^5D)4s4p(^3P^o)$  | [2]       |
| 312 | 319.752         | 385              | 319.75138             | Fe I  | $3d^6(^5D)4s4p(^3P^o)$ | $3d^6(^5D)4s(^4D)4d$    | [2]       |
| 313 | 319.811         | 41               | 319.8032              | Fe I  | $3d^6(^5D)4s4p(^3P^o)$ | $3d^64s(^6D)5d$         | [2]       |

| No. | Wavelength (nm) | Intensity (a.u.) | Wavelength (nm), Ref. | Type  | Lower energy level     | Higher energy level      | Reference |
|-----|-----------------|------------------|-----------------------|-------|------------------------|--------------------------|-----------|
| 314 | 319.858         | 566              | 319.8475              | Fe I  | $3d^6(^5D)4s4p(^3P^o)$ | $3d^64s(^6D)5d$          | [2]       |
| 315 | 320.239         | 26               | 320.2353              | Fe II | $3d^6(^5D)4p$          | $3d^6(^5D)5s$            | [1]       |
| 316 | 321.331         | 34               | 321.330896            | Fe II | $3d^7$                 | $3d^6(^5D)4p$            | [1]       |
| 317 | 321.438         | 1413             | 321.43956             | Fe I  | $3d^64s^2$             | $3d^6(^5D)4s4p(^3P^o)$   | [2]       |
| 318 | 321.735         | 204              | 321.7377              | Fe I  | $3d^6(^5D)4s4p(^3P^o)$ | $3d^6(^5D)4s(^6D)4d$     | [2]       |
| 319 | 321.96          | 557              | 321.95819             | Fe I  | $3d^6(^5D)4s4p(^3P^o)$ | $3d^6(^5D)4s(^6D)4d$     | [2]       |
| 320 | 322.577         | 4420             | 322.5787              | Fe I  | $3d^6(^5D)4s4p(^3P^o)$ | $3d^6(^5D)4s(^6D)4d$     | [2]       |
| 321 | 322.886         | 68               | 322.88984             | Fe I  | $3d^6(^5D)4s4p(^3P^o)$ | $3d^6(^5D)4s(^6D)4d$     | [2]       |
| 322 | 322.91          | 141              | 322.91201             | Fe I  | $3d^64s^2$             | $3d^6(^5D)4s4p(^3P^o)$   | [2]       |
| 323 | 323.1           | 227              | 323.09634             | Fe I  | $3d^6(^5D)4s4p(^3P^o)$ | $3d^6(^5D)4s(^6D)4d$     | [2]       |
| 324 | 323.242         | 1953             | 323.232               | Fe II | $3d^6(^1G_2)4p$        | $3d^6(^3G)5s$            | [1]       |
| 325 | 323.396         | 263              | 323.39672             | Fe I  | $3d^6(^5D)4s4p(^3P^o)$ | $3d^6(^5D)4s(^6D)4d$     | [2]       |
| 326 | 323.622         | 1294             | 323.62221             | Fe I  | $3d^64s^2$             | $3d^6(^5D)4s4p(^3P^o)$   | [2]       |
| 327 | 324.347         | 39               | 324.33994             | Fe I  | $3d^6(^5D)4s4p(^3P^o)$ | $3d^6(^5D)4s(^4D)4d$     | [2]       |
| 328 | 324.418         | 1030             | 324.41874             | Fe I  | $3d^6(^5D)4s4p(^3P^o)$ | $3d^6(^5D)4s(^6D)4d$     | [2]       |
| 329 | 324.762         | 36               | 324.75439             | Fe II | $3d^6(^3D)4s$          | $3d^5(^6S)4s4p(^3P^o)$   | [1]       |
| 330 | 324.833         | 158              | 324.8204              | Fe I  | $3d^6(^5D)4s4p(^3P^o)$ | $3d^6(^5D)4s(^6D)4d$     | [2]       |
| 331 | 325.035         | 95               | 325.03966             | Fe I  | $3d^7(^4P)4s$          | $3d^7(^2P)4p$            | [2]       |
| 332 | 325.296         | 27               | 325.29142             | Fe I  | $3d^64s^2$             | $3d^7(^2H)4p$            | [2]       |
| 333 | 325.438         | 120              | 325.43617             | Fe I  | $3d^7(^2H)4s$          | $3d^6(^1I)4s4p(^3P^o)$   | [2]       |
| 334 | 325.675         | 32               | 325.67005             | Fe I  | $3d^6(^5D)4s4p(^3P^o)$ | $3d^64s(^4D)4d$          | [2]       |
| 335 | 325.758         | 47               | 325.75924             | Fe I  | $3d^7(^4P)4s$          | $3d^6(^3G)4s4p(^3P^o)$   | [2]       |
| 336 | 326.008         | 31               | 325.99892             | Fe I  | $3d^6(^5D)4s4p(^3P^o)$ | $3d^6(^5D)4s(^6D)4d$     | [2]       |
| 337 | 326.506         | 213              | 326.50467             | Fe I  | $3d^64s^2$             | $3d^6(^5D)4s4p(^3P^o)$   | [2]       |
| 338 | 327.265         | 46               | 327.25962             | Fe I  | $3d^7(^4F)4s$          | $3d^6(^3H)4s4p(^3P^o)$   | [2]       |
| 339 | 327.443         | 42               | 327.44506             | Fe I  | $3d^6(^5D)4s4p(^3P^o)$ | $3d^6(^5D)4s(^4D)4d$     | [2]       |
| 340 | 327.645         | 39               | 327.64702             | Fe I  | $3d^7(^4P)4s$          | $3d^6(^3G)4s4p(^3P^o)$   | [2]       |
| 341 | 327.668         | 26               | 327.66018             | Fe II | $3d^7$                 | $3d^6(^3H)4p$            | [1]       |
| 342 | 327.728         | 61               | 327.7349              | Fe II | $3d^6(^5D)4s$          | $3d^6(^5D)4p$            | [1]       |
| 343 | 328.024         | 99               | 328.02602             | Fe I  | $3d^7(^2H)4s$          | $3d^6(^1I)4s4p(^3P^o)$   | [2]       |
| 344 | 328.677         | 788              | 328.67528             | Fe I  | $3d^7(^4P)4s$          | $3d^5(^6S)4s^24p$        | [2]       |
| 345 | 329.068         | 25               | 329.0712              | Fe I  | $3d^7(^4P)4s$          | $3d^6(^3G)4s4p(^3P^o)$   | [2]       |
| 346 | 329.127         | 80               | 329.1129              | Fe II | $3d^6(^5D)4d$          | $3d^6(^5D_3)5f$          | [1]       |
| 347 | 329.198         | 94               | 329.20206             | Fe I  | $3d^7(^2D_2)4s$        | $3d^6(^1G_2)4s4p(^3P^o)$ | [2]       |
| 348 | 329.258         | 60               | 329.25893             | Fe I  | $3d^7(^4P)4s$          | $3d^5(^6S)4s^24p$        | [2]       |

| No. | Wavelength (nm) | Intensity (a.u.) | Wavelength (nm), Ref. | Type  | Lower energy level     | Higher energy level     | Reference |
|-----|-----------------|------------------|-----------------------|-------|------------------------|-------------------------|-----------|
| 349 | 329.827         | 42               | 329.8132              | Fe I  | $3d^7(^4P)4s$          | $3d^6(^3G)4s4p(^3P^o)$  | [2]       |
| 350 | 332.246         | 44               | 332.24727             | Fe I  | $3d^6(^5D)4s4p(^3P^o)$ | $3d^6(^5D)4s(^6D)6s$    | [2]       |
| 351 | 332.364         | 62390            | 332.37362             | Fe I  | $3d^7(^4P)4s$          | $3d^7(^2D2)4p$          | [2]       |
| 352 | 332.471         | 54               | 332.47818             | Fe I  | $3d^64s^2$             | $3d^7(^4F)5p$           | [2]       |
| 353 | 332.756         | 64               | 332.74955             | Fe I  | $3d^64s^2$             | $3d^7(^2G)4p$           | [2]       |
| 354 | 333.159         | 32               | 333.16109             | Fe I  | $3d^64s^2$             | $3d^7(^2G)4p$           | [2]       |
| 355 | 333.182         | 23               | 333.17748             | Fe I  | $3d^64s^2$             | $3d^7(^2P)4p$           | [2]       |
| 356 | 333.763         | 31               | 333.76649             | Fe I  | $3d^7(^2G)4s$          | $3d^7(^2H)4p$           | [2]       |
| 357 | 333.906         | 46               | 333.91944             | Fe I  | $3d^64s^2$             | $3d^7(^2G)4p$           | [2]       |
| 358 | 334.06          | 27               | 334.05641             | Fe I  | $3d^64s^2$             | $3d^7(^4P)4p$           | [2]       |
| 359 | 334.7           | 38               | 334.69343             | Fe I  | $3d^7(^4P)4s$          | $3d^6(^3P2)4s4p(^3P^o)$ | [2]       |
| 360 | 334.806         | 45               | 334.79253             | Fe I  | $3d^64s^2$             | $3d^6(^3G)4s4p(^3P^o)$  | [2]       |
| 361 | 335.15          | 46               | 335.15216             | Fe I  | $3d^7(^4P)4s$          | $3d^7(^4P)4p$           | [2]       |
| 362 | 335.411         | 39               | 335.40591             | Fe I  | $3d^7(^4P)4s$          | $3d^7(^2D2)4p$          | [2]       |
| 363 | 335.624         | 31               | 335.63123             | Fe I  | $3d^7(^4F)4s$          | $3d^7(^4F)4p$           | [2]       |
| 364 | 336.217         | 76               | 336.22679             | Fe I  | $3d^64s^2$             | $3d^7(^4F)5p$           | [2]       |
| 365 | 337.07          | 232              | 337.07832             | Fe I  | $3d^7(^2G)4s$          | $3d^7(^2H)4p$           | [2]       |
| 366 | 338.006         | 88               | 338.01098             | Fe I  | $3d^7(^2G)4s$          | $3d^7(^2H)4p$           | [2]       |
| 367 | 338.385         | 147              | 338.39788             | Fe I  | $3d^7(^4P)4s$          | $3d^6(^3F2)4s4p(^3P^o)$ | [2]       |
| 368 | 338.978         | 171              | 338.97416             | Fe I  | $3d^7(^4P)4s$          | $3d^6(^3P2)4s4p(^3P^o)$ | [2]       |
| 369 | 339.274         | 12975            | 339.26521             | Fe I  | $3d^7(^4P)4s$          | $3d^7(^4P)4p$           | [2]       |
| 370 | 339.452         | 45               | 339.45829             | Fe I  | $3d^7(^4P)4s$          | $3d^7(^4P)4p$           | [2]       |
| 371 | 339.701         | 29               | 339.69753             | Fe I  | $3d^7(^4F)4s$          | $3d^6(^5D)4s4p(^1P^o)$  | [2]       |
| 372 | 339.772         | 30               | 339.7638              | Fe I  | $3d^7(^4F)4s$          | $3d^6(^5D)4s4p(^1P^o)$  | [2]       |
| 373 | 340.151         | 50               | 340.15185             | Fe I  | $3d^7(^4F)4s$          | $3d^6(^5D)4s4p(^1P^o)$  | [2]       |
| 374 | 340.222         | 78               | 340.2256              | Fe I  | $3d^7(^2H)4s$          | $3d^6(^1G2)4s4p(^3P^o)$ | [2]       |
| 375 | 341.134         | 58               | 341.13529             | Fe I  | $3d^7(^2G)4s$          | $3d^7(^2D2)4p$          | [2]       |
| 376 | 341.312         | 842              | 341.31321             | Fe I  | $3d^7(^4P)4s$          | $3d^7(^4P)4p$           | [2]       |
| 377 | 341.548         | 54               | 341.5531              | Fe I  | $3d^7(^4P)4s$          | $3d^6(^3F2)4s4p(^3P^o)$ | [2]       |
| 378 | 341.785         | 10752            | 341.78403             | Fe I  | $3d^7(^4P)4s$          | $3d^7(^4P)4p$           | [2]       |
| 379 | 341.845         | 189              | 341.85069             | Fe I  | $3d^7(^4P)4s$          | $3d^7(^4P)4p$           | [2]       |
| 380 | 342.425         | 295              | 342.42842             | Fe I  | $3d^7(^4P)4s$          | $3d^7(^4P)4p$           | [2]       |
| 381 | 342.496         | 81               | 342.501               | Fe I  | $3d^7(^2G)4s$          | $3d^7(^2D2)4p$          | [2]       |
| 382 | 342.863         | 250              | 342.8748              | Fe I  | $3d^6(^5D)4s4p(^3P^o)$ | $3d^64s(^4D)4d$         | [2]       |
| 383 | 343.657         | 55               | 343.64672             | Fe II | $3d^6(^5D)4d$          | $3d^6(^5D_3)5f$         | [1]       |

| No. | Wavelength (nm) | Intensity (a.u.) | Wavelength (nm), Ref. | Type  | Lower energy level     | Higher energy level      | Reference |
|-----|-----------------|------------------|-----------------------|-------|------------------------|--------------------------|-----------|
| 384 | 343.834         | 61               | 343.83063             | Fe I  | $3d^6(^5D)4s4p(^3P^o)$ | $3d^64s(^4D)4d$          | [2]       |
| 385 | 343.893         | 68               | 343.90355             | Fe I  | $3d^7(^2G)4s$          | $3d^6(^3G)4s4p(^3P^o)$   | [2]       |
| 386 | 344.059         | 65527            | 344.06057             | Fe I  | $3d^64s^2$             | $3d^6(^5D)4s4p(^3P^o)$   | [2]       |
| 387 | 344.095         | 64227            | 344.09885             | Fe I  | $3d^64s^2$             | $3d^6(^5D)4s4p(^3P^o)$   | [2]       |
| 388 | 344.19          | 113              | 344.19044             | Fe II | $3d^6(^5D)4p$          | $3d^54s^2$               | [1]       |
| 389 | 344.391         | 9727             | 344.38763             | Fe I  | $3d^64s^2$             | $3d^6(^5D)4s4p(^3P^o)$   | [2]       |
| 390 | 344.509         | 446              | 344.51489             | Fe I  | $3d^7(^4P)4s$          | $3d^7(^4P)4p$            | [2]       |
| 391 | 344.568         | 53               | 344.57643             | Fe I  | $3d^6(^5D)4s4p(^3P^o)$ | $3d^64s(^4D)4d$          | [2]       |
| 392 | 344.864         | 176              | 344.87813             | Fe I  | $3d^7(^4P)4s$          | $3d^7(^2H)4p$            | [2]       |
| 393 | 345.03          | 120              | 345.03279             | Fe I  | $3d^7(^4P)4s$          | $3d^6(^3P_2)4s4p(^3P^o)$ | [2]       |
| 394 | 345.196         | 117              | 345.19142             | Fe I  | $3d^7(^4P)4s$          | $3d^7(^4P)4p$            | [2]       |
| 395 | 345.232         | 103              | 345.22744             | Fe I  | $3d^7(^4F)4s$          | $3d^7(^4F)4p$            | [2]       |
| 396 | 345.303         | 96               | 345.30201             | Fe I  | $3d^7(^2G)4s$          | $3d^7(^2D_2)4p$          | [2]       |
| 397 | 345.362         | 121              | 345.36155             | Fe II | $3d^6(^5D)4p$          | $3d^54s^2$               | [1]       |
| 398 | 345.421         | 14283            | 345.41496             | Fe II | $3d^6(^5D)4d$          | $3d^6(^5D_4)5f$          | [1]       |
| 399 | 345.835         | 61               | 345.83031             | Fe I  | $3d^64s^2$             | $3d^7(^4P)4p$            | [2]       |
| 400 | 345.93          | 209              | 345.94262             | Fe I  | $3d^7(^2G)4s$          | $3d^6(^3F_2)4s4p(^3P^o)$ | [2]       |
| 401 | 346.052         | 2787             | 346.04365             | Fe II | $3d^6(^5D)4d$          | $3d^6(^5D_3)5f$          | [1]       |
| 402 | 346.337         | 50               | 346.33026             | Fe I  | $3d^7(^4F)4s$          | $3d^6(^5D)4s4p(^1P^o)$   | [2]       |
| 403 | 346.585         | 22218            | 346.58604             | Fe I  | $3d^64s^2$             | $3d^6(^5D)4s4p(^3P^o)$   | [2]       |
| 404 | 346.656         | 6564             | 346.64985             | Fe I  | $3d^7(^4F)4s$          | $3d^7(^4F)4p$            | [2]       |
| 405 | 347.118         | 101              | 347.12654             | Fe I  | $3d^7(^4P)4s$          | $3d^6(^3P_2)4s4p(^3P^o)$ | [2]       |
| 406 | 347.544         | 49660            | 347.545               | Fe I  | $3d^64s^2$             | $3d^6(^5D)4s4p(^3P^o)$   | [2]       |
| 407 | 348.243         | 56               | 348.24173             | Fe II | $3d^6(^5D)4p$          | $3d^54s^2$               | [1]       |
| 408 | 348.539         | 98               | 348.534               | Fe I  | $3d^7(^4P)4s$          | $3d^7(^4P)4p$            | [2]       |
| 409 | 348.965         | 86               | 348.96675             | Fe I  | $3d^64s^2$             | $3d^7(^2H)4p$            | [2]       |
| 410 | 349.532         | 122              | 349.52865             | Fe I  | $3d^64s^2$             | $3d^7(^2G)4p$            | [2]       |
| 411 | 349.994         | 741              | 349.9881              | Fe II | $3d^6(^1G_2)4s$        | $3d^6(^3F_2)4p$          | [3]       |
| 412 | 350.36          | 139              | 350.3474              | Fe II | $3d^7$                 | $3d^6(^5D)4p$            | [5]       |
| 413 | 350.514         | 35               | 350.50583             | Fe I  | $3d^7(^2P)4s$          | $3d^7(^2D_2)4p$          | [2]       |
| 414 | 351.377         | 1330             | 351.38177             | Fe I  | $3d^7(^4F)4s$          | $3d^7(^4F)4p$            | [2]       |
| 415 | 352.122         | 1654             | 352.1261              | Fe I  | $3d^7(^4F)4s$          | $3d^7(^4F)4p$            | [2]       |
| 416 | 352.181         | 76               | 352.18366             | Fe I  | $3d^7(^4P)4s$          | $3d^7(^4P)4p$            | [2]       |
| 417 | 352.229         | 76               | 352.22678             | Fe I  | $3d^6(^5D)4s4p(^3P^o)$ | $3d^6(^5D)4s(^5D)4d$     | [2]       |
| 418 | 352.465         | 109              | 352.45186             | Fe I  | $3d^7(^2G)4s$          | $3d^6(^3F_2)4s4p(^3P^o)$ | [2]       |

| No. | Wavelength (nm) | Intensity (a.u.) | Wavelength (nm), Ref. | Type  | Lower energy level     | Higher energy level    | Reference |
|-----|-----------------|------------------|-----------------------|-------|------------------------|------------------------|-----------|
| 419 | 352.985         | 183              | 352.98196             | Fe I  | $3d^6(^5D)4s4p(^3P^o)$ | $3d^6(^5D)4s(^6D)4d$   | [2]       |
| 420 | 353.044         | 58               | 353.03865             | Fe I  | $3d^6(^5D)4s4p(^3P^o)$ | $3d^6(^5D)4s(^6D)4d$   | [2]       |
| 421 | 353.174         | 45               | 353.1644              | Fe II | $3d^6(^5D)4d$          | $3d^6(^5D_0)5f$        | [1]       |
| 422 | 353.316         | 419              | 353.31979             | Fe I  | $3d^6(^5D)4s4p(^3P^o)$ | $3d^6(^5D)4s(^6D)4d$   | [2]       |
| 423 | 353.659         | 927              | 353.65556             | Fe I  | $3d^6(^5D)4s4p(^3P^o)$ | $3d^6(^5D)4s(^6D)4d$   | [2]       |
| 424 | 353.789         | 195              | 353.78947             | Fe I  | $3d^6(^5D)4s4p(^3P^o)$ | $3d^6(^5D)4s(^6D)4d$   | [2]       |
| 425 | 353.848         | 70               | 353.8553              | Fe I  | $3d^64s^2$             | $3d^5(^5S)4s^24p$      | [2]       |
| 426 | 354.013         | 120              | 354.01209             | Fe I  | $3d^6(^5D)4s4p(^3P^o)$ | $3d^6(^5D)4s(^4D)5s$   | [2]       |
| 427 | 354.379         | 40               | 354.36746             | Fe I  | $3d^7(^2P)4s$          | $3d^7(^2D_2)4p$        | [2]       |
| 428 | 354.568         | 131              | 354.56397             | Fe I  | $3d^6(^5D)4s4p(^3P^o)$ | $3d^6(^5D)4s(^6D)4d$   | [2]       |
| 429 | 354.805         | 49               | 354.80204             | Fe I  | $3d^7(^2P)4s$          | $3d^7(^2P)4p$          | [2]       |
| 430 | 355.371         | 226              | 355.37383             | Fe I  | $3d^7(^2H)4s$          | $3d^7(^2H)4p$          | [2]       |
| 431 | 355.489         | 4917             | 355.49243             | Fe I  | $3d^6(^5D)4s4p(^3P^o)$ | $3d^6(^5D)4s(^6D)4d$   | [2]       |
| 432 | 355.95          | 43               | 355.9503              | Fe I  | $3d^7(^2P)4s$          | $3d^7(^2D_2)4p$        | [2]       |
| 433 | 356.068         | 42               | 356.06965             | Fe I  | $3d^7(^2D_2)4s$        | $3d^6(^3D)4s4p(^3P^o)$ | [2]       |
| 434 | 356.54          | 37041            | 356.53787             | Fe I  | $3d^7(^4F)4s$          | $3d^7(^4F)4p$          | [2]       |
| 435 | 356.706         | 72               | 356.70309             | Fe I  | $3d^6(^5D)4s4p(^3P^o)$ | $3d^6(^5D)4s(^6D)4d$   | [2]       |
| 436 | 356.847         | 15258            | 356.84322             | Fe I  | $3d^6(^5D)4s4p(^3P^o)$ | $3d^6(^5D)4s(^6D)4d$   | [2]       |
| 437 | 357.119         | 206              | 357.12254             | Fe I  | $3d^7(^4F)4s$          | $3d^6(^5D)4s4p(^1P^o)$ | [2]       |
| 438 | 357.201         | 453              | 357.1995              | Fe I  | $3d^6(^5D)4s4p(^3P^o)$ | $3d^6(^5D)4s(^6D)4d$   | [2]       |
| 439 | 357.26          | 46               | 357.25903             | Fe I  | $3d^6(^5D)4s4p(^3P^o)$ | $3d^6(^5D)4s(^6D)4d$   | [2]       |
| 440 | 357.343         | 61               | 357.33934             | Fe I  | $3d^7(^2D_2)4s$        | $3d^6(^3G)4s4p(^3P^o)$ | [2]       |
| 441 | 357.603         | 57               | 357.59772             | Fe I  | $3d^6(^5D)4s4p(^3P^o)$ | $3d^6(^5D)4s(^6D)4d$   | [2]       |
| 442 | 357.673         | 73               | 357.67584             | Fe I  | $3d^7(^2H)4s$          | $3d^6(^3D)4s4p(^3P^o)$ | [2]       |
| 443 | 357.839         | 52               | 357.83822             | Fe I  | $3d^6(^5D)4s4p(^3P^o)$ | $3d^6(^5D)4s(^6D)4d$   | [2]       |
| 444 | 357.874         | 84               | 357.8676              | Fe I  | $3d^64s^2$             | $3d^7(^4P)4p$          | [2]       |
| 445 | 358.122         | 65527            | 358.11928             | Fe I  | $3d^7(^4F)4s$          | $3d^7(^4F)4p$          | [2]       |
| 446 | 358.216         | 315              | 358.21996             | Fe I  | $3d^7(^2H)4s$          | $3d^6(^3D)4s4p(^3P^o)$ | [2]       |
| 447 | 358.252         | 84               | 358.2564              | Fe I  | $3d^64s^2$             | $3d^6(^3G)4s4p(^3P^o)$ | [2]       |
| 448 | 358.499         | 806              | 358.49574             | Fe I  | $3d^7(^2H)4s$          | $3d^6(^3G)4s4p(^3P^o)$ | [2]       |
| 449 | 358.535         | 3750             | 358.53187             | Fe I  | $3d^7(^4F)4s$          | $3d^7(^4F)4p$          | [2]       |
| 450 | 358.57          | 1578             | 358.57051             | Fe I  | $3d^7(^4F)4s$          | $3d^7(^4F)4p$          | [2]       |
| 451 | 358.617         | 958              | 358.61124             | Fe I  | $3d^7(^2H)4s$          | $3d^6(^3G)4s4p(^3P^o)$ | [2]       |
| 452 | 358.7           | 3342             | 358.69845             | Fe I  | $3d^7(^4F)4s$          | $3d^7(^4F)4p$          | [2]       |
| 453 | 358.771         | 135              | 358.775156            | Fe I  |                        |                        | [2]       |

| No. | Wavelength (nm) | Intensity (a.u.) | Wavelength (nm), Ref. | Type  | Lower energy level     | Higher energy level     | Reference |
|-----|-----------------|------------------|-----------------------|-------|------------------------|-------------------------|-----------|
| 454 | 358.912         | 142              | 358.91048             | Fe I  | $3d^7(^4F)4s$          | $3d^7(^4F)4p$           | [2]       |
| 455 | 359.467         | 335              | 359.4632              | Fe I  | $3d^6(^5D)4s4p(^3P^o)$ | $3d^6(^5D)4s(^6D)4d$    | [2]       |
| 456 | 359.584         | 50               | 359.58643             | Fe I  | $3d^64s^2$             | $3d^6(^3G)4s4p(^3P^o)$  | [2]       |
| 457 | 359.632         | 54               | 359.61957             | Fe I  | $3d^64s^2$             | $3d^6(^3G)4s4p(^3P^o)$  | [2]       |
| 458 | 359.95          | 78               | 359.96249             | Fe I  | $3d^7(^2H)4s$          | $3d^6(^1G2)4s4p(^3P^o)$ | [2]       |
| 459 | 360.881         | 25988            | 360.88591             | Fe I  | $3d^7(^4F)4s$          | $3d^7(^4F)4p$           | [2]       |
| 460 | 361.011         | 1712             | 361.01588             | Fe I  | $3d^6(^5D)4s4p(^3P^o)$ | $3d^6(^5D)4s(^6D)4d$    | [2]       |
| 461 | 361.212         | 231              | 361.20684             | Fe I  | $3d^6(^5D)4s4p(^3P^o)$ | $3d^6(^5D)4s(^6D)4d$    | [2]       |
| 462 | 361.329         | 45               | 361.31445             | Fe I  | $3d^6(^5D)4s4p(^3P^o)$ | $3d^6(^5D)4s(^6D)4d$    | [2]       |
| 463 | 361.659         | 57               | 361.6565              | Fe I  | $3d^6(^5D)4s4p(^3P^o)$ | $3d^64s(^4D)4d$         | [2]       |
| 464 | 361.777         | 575              | 361.77858             | Fe I  | $3d^7(^2P)4s$          | $3d^7(^2P)4p$           | [2]       |
| 465 | 362.048         | 40               | 362.04654             | Fe I  | $3d^7(^2D2)4s$         | $3d^7(^4F)5p$           | [2]       |
| 466 | 362.143         | 1003             | 362.14604             | Fe I  | $3d^7(^2G)4s$          | $3d^7(^2G)4p$           | [2]       |
| 467 | 362.202         | 601              | 362.20031             | Fe I  | $3d^7(^2G)4s$          | $3d^7(^2G)4p$           | [2]       |
| 468 | 362.319         | 495              | 362.31858             | Fe I  | $3d^64s^2$             | $3d^6(^3H)4s4p(^3P^o)$  | [2]       |
| 469 | 362.378         | 66               | 362.37728             | Fe I  | $3d^6(^5D)4s4p(^3P^o)$ | $3d^6(^5D)4s(^6D)4d$    | [2]       |
| 470 | 362.484         | 38               | 362.489               | Fe II | $3d^6(^1S2)4s$         | $3d^6(^3P2)4p$          | [5]       |
| 471 | 362.52          | 131              | 362.51415             | Fe I  | $3d^6(^5D)4s4p(^3P^o)$ | $3d^6(^5D)4s(^6D)4d$    | [2]       |
| 472 | 362.802         | 65               | 362.80914             | Fe I  | $3d^7(^4P)4s$          | $3d^6(^3P2)4s4p(^3P^o)$ | [2]       |
| 473 | 363.026         | 192              | 363.03475             | Fe I  | $3d^6(^5D)4s4p(^3P^o)$ | $3d^6(^5D)4s(^6D)4d$    | [2]       |
| 474 | 363.144         | 61943            | 363.14629             | Fe I  | $3d^7(^4F)4s$          | $3d^7(^4F)4p$           | [2]       |
| 475 | 363.203         | 278              | 363.20386             | Fe I  | $3d^7(^2P)4s$          | $3d^7(^2P)4p$           | [2]       |
| 476 | 363.25          | 89               | 363.25551             | Fe I  | $3d^64s^2$             | $3d^7(^2D2)4p$          | [2]       |
| 477 | 363.285         | 107              | 363.29767             | Fe I  | $3d^64s^2$             | $3d^7(^4P)4p$           | [2]       |
| 478 | 363.368         | 2741             | 363.38266             | Fe I  | $3d^64s^2$             | $3d^6(^3H)4s4p(^3P^o)$  | [2]       |
| 479 | 363.474         | 119              | 363.46967             | Fe I  | $3d^6(^5D)4s4p(^3P^o)$ | $3d^7(^4F)5d$           | [2]       |
| 480 | 364.039         | 930              | 364.03883             | Fe I  | $3d^7(^2G)4s$          | $3d^7(^2G)4p$           | [2]       |
| 481 | 364.263         | 44               | 364.2538              | Fe II | $3d^5(^4P)4s4p(^3P^o)$ | $3d^6(^5D)6d$           | [1]       |
| 482 | 364.393         | 1334             | 364.37935             | Fe I  | $3d^7(^2D2)4s$         | $3d^7(^4F)5p$           | [2]       |
| 483 | 364.487         | 220              | 364.47949             | Fe I  | $3d^6(^5D)4s4p(^3P^o)$ | $3d^7(^4F)4d$           | [2]       |
| 484 | 364.546         | 55               | 364.54937             | Fe I  | $3d^64s^2$             | $3d^6(^3H)4s4p(^3P^o)$  | [2]       |
| 485 | 364.581         | 106              | 364.58199             | Fe I  | $3d^7(^2P)4s$          | $3d^7(^2P)4p$           | [2]       |
| 486 | 365.005         | 205              | 365.00294             | Fe I  | $3d^6(^5D)4s4p(^3P^o)$ | $3d^6(^5D)4s(^6D)4d$    | [2]       |
| 487 | 365.028         | 332              | 365.0279              | Fe I  | $3d^64s^2$             | $3d^6(^3H)4s4p(^3P^o)$  | [2]       |
| 488 | 365.146         | 1131             | 365.14667             | Fe I  | $3d^7(^2G)4s$          | $3d^7(^2G)4p$           | [2]       |

| No. | Wavelength (nm) | Intensity (a.u.) | Wavelength (nm), Ref. | Type  | Lower energy level     | Higher energy level    | Reference |
|-----|-----------------|------------------|-----------------------|-------|------------------------|------------------------|-----------|
| 489 | 365.37          | 42               | 365.37543             | Fe I  | $3d^6 4s^2$            | $3d^6(^3H)4s4p(^3P^o)$ | [2]       |
| 490 | 365.947         | 259              | 365.95166             | Fe I  | $3d^6 4s^2$            | $3d^6(^3H)4s4p(^3P^o)$ | [2]       |
| 491 | 366.041         | 42               | 366.0326              | Fe I  | $3d^6(^5D)4s4p(^3P^o)$ | $3d^6(^5D)4s(^6D)4d$   | [2]       |
| 492 | 366.088         | 43               | 366.07888             | Fe II | $3d^5(^6S)4s4p(^1P^o)$ | $3d^5 4s(^7S)5s$       | [1]       |
| 493 | 366.276         | 39               | 366.28373             | Fe I  | $3d^6(^5D)4s4p(^3P^o)$ | $3d^6 4s(^4D)4d$       | [2]       |
| 494 | 366.323         | 73               | 366.32589             | Fe I  | $3d^6 4s^2$            | $3d^6(^3G)4s4p(^3P^o)$ | [2]       |
| 495 | 366.406         | 3790             | 366.396               | Fe I  | $3d^6 4s^2$            | $3d^6(^3G)4s4p(^3P^o)$ | [2]       |
| 496 | 366.723         | 223              | 366.72529             | Fe I  | $3d^6(^5D)4s4p(^3P^o)$ | $3d^7(^4F)4d$          | [2]       |
| 497 | 366.912         | 140              | 366.91516             | Fe I  | $3d^6 4s^2$            | $3d^7(^2D)4p$          | [2]       |
| 498 | 366.947         | 596              | 366.95209             | Fe I  | $3d^7(^2G)4s$          | $3d^7(^2G)4p$          | [2]       |
| 499 | 367.17          | 48               | 367.16876             | Fe I  | $3d^7(^2G)4s$          | $3d^6(^3F)4s4p(^3P^o)$ | [2]       |
| 500 | 367.394         | 40               | 367.40404             | Fe I  | $3d^7(^2H)4s$          | $3d^7(^4F)5p$          | [2]       |
| 501 | 367.488         | 112              | 367.47634             | Fe I  | $3d^7(^4P)4s$          | $3d^7(^2P)4p$          | [2]       |
| 502 | 367.629         | 289              | 367.63107             | Fe I  | $3d^6 4s^2$            | $3d^6(^3F)4s4p(^3P^o)$ | [2]       |
| 503 | 367.888         | 69               | 367.88601             | Fe I  | $3d^6 4s^2$            | $3d^6(^3P)4s4p(^3P^o)$ | [2]       |
| 504 | 367.994         | 26192            | 367.99131             | Fe I  | $3d^6 4s^2$            | $3d^6(^5D)4s4p(^3P^o)$ | [2]       |
| 505 | 368.745         | 5938             | 368.74564             | Fe I  | $3d^7(^4F)4s$          | $3d^7(^4F)4p$          | [2]       |
| 506 | 368.84          | 36               | 368.84602             | Fe I  | $3d^7(^2D)4s$          | $3d^7(^4F)5p$          | [2]       |
| 507 | 369.075         | 93               | 369.07264             | Fe I  | $3d^7(^2H)4s$          | $3d^7(^2H)4p$          | [2]       |
| 508 | 369.311         | 38               | 369.3026              | Fe I  | $3d^6 4s^2$            | $3d^6(^3G)4s4p(^3P^o)$ | [2]       |
| 509 | 369.594         | 43               | 369.60299             | Fe I  | $3d^6 4s^2$            | $3d^6(^3P)4s4p(^3P^o)$ | [2]       |
| 510 | 369.865         | 44               | 369.86026             | Fe I  | $3d^7(^2P)4s$          | $3d^7(^2D)4p$          | [2]       |
| 511 | 369.912         | 57               | 369.91384             | Fe I  | $3d^7(^2P)4s$          | $3d^6(^5D)4s(^6D)5p$   | [2]       |
| 512 | 370.112         | 1517             | 370.1086              | Fe I  | $3d^6(^5D)4s4p(^3P^o)$ | $3d^6(^5D)4s(^6D)4d$   | [2]       |
| 513 | 370.206         | 53               | 370.20291             | Fe I  | $3d^7(^4P)4s$          | $3d^7(^2P)4p$          | [2]       |
| 514 | 370.253         | 34               | 370.24917             | Fe I  | $3d^7(^4P)4s$          | $3d^6(^3F)4s4p(^3P^o)$ | [2]       |
| 515 | 370.701         | 278              | 370.70442             | Fe I  | $3d^6(^5D)4s4p(^3P^o)$ | $3d^6(^5D)4s(^6D)4d$   | [2]       |
| 516 | 370.925         | 9971             | 370.92461             | Fe I  | $3d^7(^4F)4s$          | $3d^7(^4F)4p$          | [2]       |
| 517 | 371.125         | 163              | 371.12224             | Fe I  | $3d^6 4s^2$            | $3d^6(^3F)4s4p(^3P^o)$ | [2]       |
| 518 | 371.148         | 91               | 371.1408              | Fe I  | $3d^7(^2P)4s$          | $3d^7(^2P)4p$          | [2]       |
| 519 | 371.596         | 110              | 371.59113             | Fe I  | $3d^6 4s^2$            | $3d^6(^3P)4s4p(^3P^o)$ | [2]       |
| 520 | 371.643         | 577              | 371.64419             | Fe I  | $3d^6(^5D)4s4p(^3P^o)$ | $3d^6(^5D)4s(^6D)4d$   | [2]       |
| 521 | 371.843         | 178              | 371.84062             | Fe I  | $3d^7(^2G)4s$          | $3d^6(^3F)4s4p(^3P^o)$ | [2]       |
| 522 | 371.996         | 65527            | 371.99345             | Fe I  | $3d^6 4s^2$            | $3d^6(^5D)4s4p(^3P^o)$ | [2]       |
| 523 | 372.255         | 53014            | 372.25627             | Fe I  | $3d^6 4s^2$            | $3d^6(^5D)4s4p(^3P^o)$ | [2]       |

| No. | Wavelength (nm) | Intensity (a.u.) | Wavelength (nm), Ref. | Type | Lower energy level       | Higher energy level        | Reference |
|-----|-----------------|------------------|-----------------------|------|--------------------------|----------------------------|-----------|
| 524 | 372.443         | 478              | 372.43767             | Fe I | $3d^6 4s^2$              | $3d^6(^3P_2) 4s 4p(^3P^0)$ | [2]       |
| 525 | 372.537         | 65               | 372.54906             | Fe I | $3d^7(^2G) 4s$           | $3d^6(^3G) 4s 4p(^3P^0)$   | [2]       |
| 526 | 372.714         | 9305             | 372.70922             | Fe I | $3d^6(^5D) 4s 4p(^3P^0)$ | $3d^6(^5D) 4s (^6D) 4d$    | [2]       |
| 527 | 372.867         | 74               | 372.86678             | Fe I | $3d^6 4s^2$              | $3d^7(^2G) 4p$             | [2]       |
| 528 | 373.09          | 160              | 373.0946              | Fe I | $3d^6 4s^2$              | $3d^6(^3F_2) 4s 4p(^3P^0)$ | [2]       |
| 529 | 373.137         | 125              | 373.13734             | Fe I | $3d^6 4s^2$              | $3d^6(^3G) 4s 4p(^3P^0)$   | [2]       |
| 530 | 373.243         | 1573             | 373.23961             | Fe I | $3d^7(^4P) 4s$           | $3d^7(^4P) 4p$             | [2]       |
| 531 | 373.337         | 29097            | 373.33173             | Fe I | $3d^6 4s^2$              | $3d^6(^5D) 4s 4p(^3P^0)$   | [2]       |
| 532 | 373.49          | 65527            | 373.48636             | Fe I | $3d^7(^4F) 4s$           | $3d^7(^4F) 4p$             | [2]       |
| 533 | 373.537         | 1109             | 373.53235             | Fe I | $3d^6(^5D) 4s 4p(^3P^0)$ | $3d^6(^5D) 4s (^6D) 4d$    | [2]       |
| 534 | 373.714         | 65527            | 373.71313             | Fe I | $3d^6 4s^2$              | $3d^6(^5D) 4s 4p(^3P^0)$   | [2]       |
| 535 | 373.832         | 606              | 373.83049             | Fe I | $3d^7(^2H) 4s$           | $3d^7(^2H) 4p$             | [2]       |
| 536 | 373.914         | 94               | 373.91156             | Fe I | $3d^7(^4P) 4s$           | $3d^6(^3F_2) 4s 4p(^3P^0)$ | [2]       |
| 537 | 373.949         | 152              | 373.95229             | Fe I | $3d^7(^2D_2) 4s$         | $3d^6(^3G) 4s 4p(^3P^0)$   | [2]       |
| 538 | 374.22          | 68               | 374.21403             | Fe I | $3d^6(^5D) 4s 4p(^3P^0)$ | $3d^6(^5D) 4s (^4D) 4d$    | [2]       |
| 539 | 374.373         | 249              | 374.37763             | Fe I | $3d^7(^2G) 4s$           | $3d^6(^3H) 4s 4p(^3P^0)$   | [2]       |
| 540 | 374.596         | 37799            | 374.58993             | Fe I | $3d^6 4s^2$              | $3d^6(^5D) 4s 4p(^3P^0)$   | [2]       |
| 541 | 374.831         | 65527            | 374.82619             | Fe I | $3d^6 4s^2$              | $3d^6(^5D) 4s 4p(^3P^0)$   | [2]       |
| 542 | 374.949         | 65527            | 374.94851             | Fe I | $3d^7(^4F) 4s$           | $3d^7(^4F) 4p$             | [2]       |
| 543 | 375.184         | 52               | 375.18212             | Fe I | $3d^7(^2G) 4s$           | $3d^6(^3G) 4s 4p(^3P^0)$   | [2]       |
| 544 | 375.325         | 175              | 375.31375             | Fe I | $3d^6 4s^2$              | $3d^6(^3H) 4s 4p(^3P^0)$   | [2]       |
| 545 | 375.36          | 308              | 375.36107             | Fe I | $3d^7(^4P) 4s$           | $3d^6(^3P_2) 4s 4p(^3P^0)$ | [2]       |
| 546 | 375.454         | 41               | 375.44999             | Fe I | $3d^6(^5D) 4s 4p(^3P^0)$ | $3d^6(^5D) 4s (^6D) 4d$    | [2]       |
| 547 | 375.607         | 52               | 375.6068              | Fe I | $3d^7(^4P) 4s$           | $3d^6(^3F_2) 4s 4p(^3P^0)$ | [2]       |
| 548 | 375.701         | 108              | 375.69371             | Fe I | $3d^7(^2H) 4s$           | $3d^6(^1G_2) 4s 4p(^3P^0)$ | [2]       |
| 549 | 375.819         | 59850            | 375.82327             | Fe I | $3d^7(^4F) 4s$           | $3d^7(^4F) 4p$             | [2]       |
| 550 | 375.924         | 53               | 375.91545             | Fe I | $3d^6 4s^2$              | $3d^7(^2H) 4p$             | [2]       |
| 551 | 376.007         | 2809             | 376.00494             | Fe I | $3d^6 4s^2$              | $3d^6(^3H) 4s 4p(^3P^0)$   | [2]       |
| 552 | 376.054         | 186              | 376.05316             | Fe I | $3d^7(^4P) 4s$           | $3d^7(^4P) 4p$             | [2]       |
| 553 | 376.136         | 39               | 376.14083             | Fe I | $3d^6 4s^2$              | $3d^7(^2G) 4p$             | [2]       |
| 554 | 376.383         | 35229            | 376.37888             | Fe I | $3d^7(^4F) 4s$           | $3d^7(^4F) 4p$             | [2]       |
| 555 | 376.665         | 76               | 376.6659              | Fe I | $3d^6(^5D) 4s 4p(^3P^0)$ | $3d^6(^5D) 4s (^6D) 4d$    | [2]       |
| 556 | 376.724         | 16518            | 376.71915             | Fe I | $3d^7(^4F) 4s$           | $3d^7(^4F) 4p$             | [2]       |
| 557 | 377.006         | 74               | 376.99871             | Fe I | $3d^6(^5D) 4s 4p(^3P^0)$ | $3d^6(^5D) 4s (^6D) 4d$    | [2]       |
| 558 | 377.252         | 59               | 377.25828             | Fe I | $3d^7(^2P) 4s$           | $3d^7(^4F) 5p$             | [2]       |



| No. | Wavelength (nm) | Intensity (a.u.) | Wavelength (nm), Ref. | Type | Lower energy level     | Higher energy level     | Reference |
|-----|-----------------|------------------|-----------------------|------|------------------------|-------------------------|-----------|
| 559 | 377.37          | 31               | 377.36913             | Fe I | $3d^6(^5D)4s4p(^3P^o)$ | $3d^6(^5D)4s(^6D)4d$    | [2]       |
| 560 | 377.487         | 44               | 377.4824              | Fe I | $3d^7(^4P)4s$          | $3d^6(^3P2)4s4p(^3P^o)$ | [2]       |
| 561 | 377.652         | 213              | 377.64545             | Fe I | $3d^7(^4P)4s$          | $3d^6(^3F2)4s4p(^3P^o)$ | [2]       |
| 562 | 377.71          | 1798             | 377.70663             | Fe I | $3d^64s^2$             | $3d^7(^2G)4p$           | [2]       |
| 563 | 377.828         | 27               | 377.83144             | Fe I | $3d^7(^4P)4s$          | $3d^6(^3F2)4s4p(^3P^o)$ | [2]       |
| 564 | 377.851         | 59               | 377.85088             | Fe I | $3d^7(^2D2)4s$         | $3d^7(^2D2)4p$          | [2]       |
| 565 | 378.122         | 49               | 378.1186              | Fe I | $3d^7(^4P)4s$          | $3d^6(^3F2)4s4p(^3P^o)$ | [2]       |
| 566 | 378.673         | 395              | 378.66766             | Fe I | $3d^7(^4F)4s$          | $3d^6(^5D)4s4p(^3P^o)$  | [2]       |
| 567 | 378.791         | 4532             | 378.78799             | Fe I | $3d^7(^4F)4s$          | $3d^7(^4F)4p$           | [2]       |
| 568 | 378.92          | 62               | 378.91758             | Fe I | $3d^7(^2G)4s$          | $3d^7(^2G)4p$           | [2]       |
| 569 | 378.944         | 54               | 378.95736             | Fe I | $3d^64s^2$             | $3d^6(^3P2)4s4p(^3P^o)$ | [2]       |
| 570 | 379.178         | 36               | 379.17421             | Fe I | $3d^6(^5D)4s4p(^3P^o)$ | $3d^7(^4F)4d$           | [2]       |
| 571 | 379.214         | 122              | 379.21542             | Fe I | $3d^7(^2G)4s$          | $3d^6(^3G)4s4p(^3P^o)$  | [2]       |
| 572 | 379.39          | 53               | 379.38714             | Fe I | $3d^7(^4P)4s$          | $3d^6(^3F2)4s4p(^3P^o)$ | [2]       |
| 573 | 379.437         | 1013             | 379.43395             | Fe I | $3d^64s^2$             | $3d^6(^3H)4s4p(^3P^o)$  | [2]       |
| 574 | 379.495         | 6042             | 379.50019             | Fe I | $3d^7(^4F)4s$          | $3d^7(^4F)4p$           | [2]       |
| 575 | 379.754         | 791              | 379.75146             | Fe I | $3d^7(^2H)4s$          | $3d^7(^2H)4p$           | [2]       |
| 576 | 379.847         | 4077             | 379.85111             | Fe I | $3d^7(^4F)4s$          | $3d^7(^4F)4p$           | [2]       |
| 577 | 379.953         | 8046             | 379.95473             | Fe I | $3d^7(^4F)4s$          | $3d^7(^4F)4p$           | [2]       |
| 578 | 380.2           | 48               | 380.19837             | Fe I | $3d^6(^5D)4s4p(^3P^o)$ | $3d^7(^4F)4d$           | [2]       |
| 579 | 380.399         | 33               | 380.40092             | Fe I | $3d^6(^5D)4s4p(^3P^o)$ | $3d^7(^4F)4d$           | [2]       |
| 580 | 380.587         | 39               | 380.5789              | Fe I | $3d^6(^5D)4s4p(^3P^o)$ | $3d^64s(^4D)4d$         | [2]       |
| 581 | 380.622         | 56               | 380.62164             | Fe I | $3d^7(^2P)4s$          | $3d^7(^2P)4p$           | [2]       |
| 582 | 380.751         | 216              | 380.75366             | Fe I | $3d^7(^4P)4s$          | $3d^6(^3P2)4s4p(^3P^o)$ | [2]       |
| 583 | 380.962         | 43               | 380.95641             | Fe I | $3d^6(^5D)4s4p(^3P^o)$ | $3d^6(^5D)4s(^6D)4d$    | [2]       |
| 584 | 381.08          | 42               | 381.07554             | Fe I | $3d^7(^2D2)4s$         | $3d^7(^2D2)4p$          | [2]       |
| 585 | 381.115         | 33               | 381.10348             | Fe I | $3d^7(^2G)4s$          | $3d^6(^3G)4s4p(^3P^o)$  | [2]       |
| 586 | 381.455         | 342              | 381.45229             | Fe I | $3d^7(^4F)4s$          | $3d^6(^5D)4s4p(^3P^o)$  | [2]       |
| 587 | 381.584         | 65527            | 381.584               | Fe I | $3d^7(^4F)4s$          | $3d^7(^4F)4p$           | [2]       |
| 588 | 381.948         | 68               | 381.9493              | Fe I | $3d^6(^5D)4s4p(^3P^o)$ | $3d^7(^4F)4d$           | [2]       |
| 589 | 382.041         | 65527            | 382.04249             | Fe I | $3d^7(^4F)4s$          | $3d^7(^4F)4p$           | [2]       |
| 590 | 382.112         | 1067             | 382.11776             | Fe I | $3d^7(^2H)4s$          | $3d^7(^2H)4p$           | [2]       |
| 591 | 382.182         | 174              | 382.18342             | Fe I | $3d^64s^2$             | $3d^6(^3F2)4s4p(^3P^o)$ | [2]       |
| 592 | 382.593         | 65527            | 382.58809             | Fe I | $3d^7(^4F)4s$          | $3d^7(^4F)4p$           | [2]       |
| 593 | 382.78          | 41256            | 382.78224             | Fe I | $3d^7(^4F)4s$          | $3d^7(^4F)4p$           | [2]       |

| No. | Wavelength (nm) | Intensity (a.u.) | Wavelength (nm), Ref. | Type | Lower energy level     | Higher energy level    | Reference |
|-----|-----------------|------------------|-----------------------|------|------------------------|------------------------|-----------|
| 594 | 382.851         | 53               | 382.85037             | Fe I | $3d^7(^2G)4s$          | $3d^6(^3G)4s4p(^3P^o)$ | [2]       |
| 595 | 382.944         | 55               | 382.94516             | Fe I | $3d^7(^2D)4s$          | $3d^7(^2P)4p$          | [2]       |
| 596 | 382.98          | 231              | 382.9764              | Fe I | $3d^64s^2$             | $3d^7(^4P)4p$          | [2]       |
| 597 | 383.331         | 203              | 383.33079             | Fe I | $3d^64s^2$             | $3d^7(^4P)4p$          | [2]       |
| 598 | 383.425         | 38614            | 383.42222             | Fe I | $3d^7(^4F)4s$          | $3d^7(^4F)4p$          | [2]       |
| 599 | 383.636         | 168              | 383.63301             | Fe I | $3d^7(^2D)4s$          | $3d^7(^2D)4p$          | [2]       |
| 600 | 383.929         | 650              | 383.92556             | Fe I | $3d^7(^2G)4s$          | $3d^6(^3F)4s4p(^3P^o)$ | [2]       |
| 601 | 384.046         | 13961            | 384.04372             | Fe I | $3d^7(^4F)4s$          | $3d^7(^4F)4p$          | [2]       |
| 602 | 384.105         | 22737            | 384.10477             | Fe I | $3d^7(^4F)4s$          | $3d^7(^4F)4p$          | [2]       |
| 603 | 384.327         | 784              | 384.32565             | Fe I | $3d^7(^2G)4s$          | $3d^7(^2G)4p$          | [2]       |
| 604 | 384.597         | 33               | 384.59849             | Fe I | $3d^6(^5D)4s4p(^3P^o)$ | $3d^7(^4F)4d$          | [2]       |
| 605 | 384.644         | 68               | 384.64091             | Fe I | $3d^7(^2H)4s$          | $3d^6(^3G)4s4p(^3P^o)$ | [2]       |
| 606 | 384.995         | 4622             | 384.99664             | Fe I | $3d^7(^4F)4s$          | $3d^7(^4F)4p$          | [2]       |
| 607 | 385.077         | 1305             | 385.08176             | Fe I | $3d^7(^4F)4s$          | $3d^6(^5D)4s4p(^3P^o)$ | [2]       |
| 608 | 385.253         | 160              | 385.25724             | Fe I | $3d^7(^4P)4s$          | $3d^6(^3P)4s4p(^3P^o)$ | [2]       |
| 609 | 385.429         | 96               | 385.43663             | Fe I | $3d^6(^5D)4s4p(^3P^o)$ | $3d^6(^5D)4s(^6D)4d$   | [2]       |
| 610 | 385.534         | 51               | 385.53135             | Fe I | $3d^7(^2G)4s$          | $3d^6(^3G)4s4p(^3P^o)$ | [2]       |
| 611 | 385.64          | 65527            | 385.63713             | Fe I | $3d^64s^2$             | $3d^6(^5D)4s4p(^3P^o)$ | [2]       |
| 612 | 385.921         | 2068             | 385.92123             | Fe I | $3d^64s^2$             | $3d^6(^3H)4s4p(^3P^o)$ | [2]       |
| 613 | 385.991         | 65527            | 385.99111             | Fe I | $3d^64s^2$             | $3d^6(^5D)4s4p(^3P^o)$ | [2]       |
| 614 | 386.553         | 2947             | 386.55228             | Fe I | $3d^7(^4F)4s$          | $3d^7(^4F)4p$          | [2]       |
| 615 | 386.717         | 346              | 386.72157             | Fe I | $3d^7(^2P)4s$          | $3d^7(^2P)4p$          | [2]       |
| 616 | 387.173         | 109              | 387.17477             | Fe I | $3d^64s^2$             | $3d^7(^2G)4p$          | [2]       |
| 617 | 387.244         | 4425             | 387.25009             | Fe I | $3d^7(^4F)4s$          | $3d^7(^4F)4p$          | [2]       |
| 618 | 387.291         | 65               | 387.2921              | Fe I | $3d^7(^2G)4s$          | $3d^6(^3F)4s4p(^3P^o)$ | [2]       |
| 619 | 387.372         | 917              | 387.37603             | Fe I | $3d^64s^2$             | $3d^6(^3H)4s4p(^3P^o)$ | [2]       |
| 620 | 387.607         | 46               | 387.60397             | Fe I | $3d^7(^4F)4s$          | $3d^6(^5D)4s4p(^3P^o)$ | [2]       |
| 621 | 387.794         | 5041             | 387.8018              | Fe I | $3d^7(^4F)4s$          | $3d^7(^4F)4p$          | [2]       |
| 622 | 387.852         | 65383            | 387.8573              | Fe I | $3d^64s^2$             | $3d^6(^5D)4s4p(^3P^o)$ | [2]       |
| 623 | 388.203         | 194              | 388.19734             | Fe I | $3d^7(^2D)4s$          | $3d^7(^4F)5p$          | [2]       |
| 624 | 388.32          | 107              | 388.32797             | Fe I | $3d^7(^2D)4s$          | $3d^7(^2P)4p$          | [2]       |
| 625 | 388.437         | 166              | 388.43584             | Fe I | $3d^7(^2G)4s$          | $3d^7(^2G)4p$          | [2]       |
| 626 | 388.543         | 231              | 388.55103             | Fe I | $3d^64s^2$             | $3d^6(^3P)4s4p(^3P^o)$ | [2]       |
| 627 | 388.625         | 65527            | 388.6282              | Fe I | $3d^64s^2$             | $3d^6(^5D)4s4p(^3P^o)$ | [2]       |
| 628 | 388.707         | 3566             | 388.7048              | Fe I | $3d^7(^4F)4s$          | $3d^7(^4F)4p$          | [2]       |

| No. | Wavelength (nm) | Intensity (a.u.) | Wavelength (nm), Ref. | Type  | Lower energy level     | Higher energy level     | Reference |
|-----|-----------------|------------------|-----------------------|-------|------------------------|-------------------------|-----------|
| 629 | 389.046         | 40               | 389.03955             | Fe I  | $3d^6(^5D)4s4p(^3P^o)$ | $3d^6(^5D)4s(^6D)4d$    | [2]       |
| 630 | 389.081         | 91               | 389.08402             | Fe I  | $3d^7(^2G)4s$          | $3d^6(^3G)4s4p(^3P^o)$  | [2]       |
| 631 | 389.186         | 176              | 389.19262             | Fe I  | $3d^7(^2P)4s$          | $3d^7(^2D2)4p$          | [2]       |
| 632 | 389.385         | 82               | 389.39122             | Fe I  | $3d^64s^2$             | $3d^6(^3H)4s4p(^3P^o)$  | [2]       |
| 633 | 389.56          | 27371            | 389.56562             | Fe I  | $3d^64s^2$             | $3d^6(^5D)4s4p(^3P^o)$  | [2]       |
| 634 | 389.736         | 55               | 389.74485             | Fe I  | $3d^64s^2$             | $3d^7(^2G)4p$           | [2]       |
| 635 | 389.783         | 853              | 389.78896             | Fe I  | $3d^7(^2G)4s$          | $3d^6(^3G)4s4p(^3P^o)$  | [2]       |
| 636 | 389.9           | 74               | 389.90286             | Fe I  | $3d^64s^2$             | $3d^6(^3H)4s4p(^3P^o)$  | [2]       |
| 637 | 389.97          | 48414            | 389.97071             | Fe I  | $3d^64s^2$             | $3d^6(^5D)4s4p(^3P^o)$  | [2]       |
| 638 | 390.05          | 97               | 390.0515              | Fe I  | $3d^6(^5D)4s4p(^3P^o)$ | $3d^6(^5D)4s(^4D)5s$    | [2]       |
| 639 | 390.297         | 7662             | 390.29455             | Fe I  | $3d^7(^4F)4s$          | $3d^7(^4F)4p$           | [2]       |
| 640 | 390.391         | 108              | 390.38976             | Fe I  | $3d^64s^2$             | $3d^7(^2G)4p$           | [2]       |
| 641 | 390.602         | 84               | 390.6037              | Fe II | $3d^6(^1F)4s$          | $3d^6(^3G)4p$           | [5]       |
| 642 | 390.755         | 195              | 390.7465              | Fe I  | $3d^7(^2G)4s$          | $3d^6(^3F2)4s4p(^3P^o)$ | [2]       |
| 643 | 390.791         | 120              | 390.79338             | Fe I  | $3d^7(^2G)4s$          | $3d^6(^3G)4s4p(^3P^o)$  | [2]       |
| 644 | 390.896         | 35               | 390.88423             | Fe I  | $3d^6(^5D)4s4p(^3P^o)$ | $3d^64s(^4D)4d$         | [2]       |
| 645 | 390.967         | 57               | 390.96573             | Fe I  | $3d^6(^5D)4s4p(^3P^o)$ | $3d^6(^5D)4s(^4D)5s$    | [2]       |
| 646 | 390.99          | 62               | 390.98293             | Fe I  | $3d^7(^4P)4s$          | $3d^7(^4P)4p$           | [2]       |
| 647 | 391.366         | 47               | 391.36316             | Fe I  | $3d^64s^2$             | $3d^6(^3P2)4s4p(^3P^o)$ | [2]       |
| 648 | 391.425         | 29               | 391.42727             | Fe I  | $3d^6(^5D)4s4p(^3P^o)$ | $3d^6(^5D)4s(^6D)4d$    | [2]       |
| 649 | 391.672         | 199              | 391.67307             | Fe I  | $3d^7(^2H)4s$          | $3d^6(^3H)4s4p(^3P^o)$  | [2]       |
| 650 | 391.719         | 115              | 391.71807             | Fe I  | $3d^7(^4F)4s$          | $3d^7(^4F)4p$           | [2]       |
| 651 | 391.907         | 56               | 391.90652             | Fe I  | $3d^64s^2$             | $3d^7(^2G)4p$           | [2]       |
| 652 | 392.024         | 18133            | 392.02578             | Fe I  | $3d^64s^2$             | $3d^6(^5D)4s4p(^3P^o)$  | [2]       |
| 653 | 392.095         | 66               | 392.0837              | Fe I  | $3d^6(^5D)4s4p(^3P^o)$ | $3d^6(^5D)4s(^6D)4d$    | [2]       |
| 654 | 392.294         | 50483            | 392.29115             | Fe I  | $3d^64s^2$             | $3d^6(^5D)4s4p(^3P^o)$  | [2]       |
| 655 | 392.529         | 51               | 392.52002             | Fe I  | $3d^6(^5D)4s4p(^3P^o)$ | $3d^6(^5D)4s(^6D)4d$    | [2]       |
| 656 | 392.564         | 102              | 392.56435             | Fe I  | $3d^7(^4P)4s$          | $3d^7(^4P)4p$           | [2]       |
| 657 | 392.928         | 68               | 392.9208              | Fe I  | $3d^7(^2D2)4s$         | $3d^7(^2H)4p$           | [2]       |
| 658 | 393.034         | 61051            | 393.02964             | Fe I  | $3d^64s^2$             | $3d^6(^5D)4s4p(^3P^o)$  | [2]       |
| 659 | 393.116         | 69               | 393.1117              | Fe I  | $3d^6(^5D)4s4p(^3P^o)$ | $3d^6(^5D)4s(^4D)5s$    | [2]       |
| 660 | 393.269         | 123              | 393.26271             | Fe I  | $3d^7(^2G)4s$          | $3d^6(^3G)4s4p(^3P^o)$  | [2]       |
| 661 | 393.738         | 78               | 393.73276             | Fe I  | $3d^7(^2G)4s$          | $3d^6(^3H)4s4p(^3P^o)$  | [2]       |
| 662 | 394.09          | 64               | 394.08773             | Fe I  | $3d^7(^4F)4s$          | $3d^7(^4F)4p$           | [2]       |
| 663 | 394.337         | 49               | 394.33404             | Fe I  | $3d^7(^4P)4s$          | $3d^6(^3P2)4s4p(^3P^o)$ | [2]       |

| No. | Wavelength (nm) | Intensity (a.u.) | Wavelength (nm), Ref. | Type  | Lower energy level     | Higher energy level     | Reference |
|-----|-----------------|------------------|-----------------------|-------|------------------------|-------------------------|-----------|
| 664 | 394.513         | 76               | 394.51169             | Fe I  | $3d^7(^2G)4s$          | $3d^6(^3G)4s4p(^3P^o)$  | [2]       |
| 665 | 394.7           | 77               | 394.69946             | Fe I  | $3d^6(^5D)4s4p(^3P^o)$ | $3d^6(^5D)4s(^6D)4d$    | [2]       |
| 666 | 394.759         | 82               | 394.75306             | Fe I  | $3d^7(^4P)4s$          | $3d^5(^6S)4s^24p$       | [2]       |
| 667 | 394.876         | 303              | 394.87746             | Fe I  | $3d^7(^2H)4s$          | $3d^7(^2H)4p$           | [2]       |
| 668 | 394.994         | 369              | 394.99527             | Fe I  | $3d^7(^4P)4s$          | $3d^6(^3P2)4s4p(^3P^o)$ | [2]       |
| 669 | 395.123         | 307              | 395.11629             | Fe I  | $3d^7(^2D2)4s$         | $3d^7(^2P)4p$           | [2]       |
| 670 | 395.322         | 51               | 395.31511             | Fe I  | $3d^64s^2$             | $3d^7(^2G)4p$           | [2]       |
| 671 | 395.486         | 40               | 395.4712              | Fe I  | $3d^7(^2H)4s$          | $3d^6(^3H)4s4p(^3P^o)$  | [2]       |
| 672 | 395.533         | 68               | 395.5341              | Fe I  | $3d^6(^5D)4s4p(^3P^o)$ | $3d^6(^5D)4s(^6D)4d$    | [2]       |
| 673 | 395.674         | 2117             | 395.6677              | Fe I  | $3d^7(^2G)4s$          | $3d^6(^3H)4s4p(^3P^o)$  | [2]       |
| 674 | 396.026         | 82               | 396.02789             | Fe I  | $3d^64s^2$             | $3d^6(^3G)4s4p(^3P^o)$  | [2]       |
| 675 | 396.119         | 37               | 396.114               | Fe I  | $3d^7(^4P)4s$          | $3d^5(^6S)4s^24p$       | [2]       |
| 676 | 396.307         | 133              | 396.31002             | Fe I  | $3d^6(^5D)4s4p(^3P^o)$ | $3d^6(^5D)4s(^6D)4d$    | [2]       |
| 677 | 396.389         | 79               | 396.396               | Fe II | $3d^6(^5D)4d$          | $3d^6(^5D_3)5f$         | [1]       |
| 678 | 396.553         | 27               | 396.55086             | Fe I  | $3d^6(^5D)4s4p(^3P^o)$ | $3d^6(^5D)4s(^4D)5s$    | [2]       |
| 679 | 396.612         | 137              | 396.60614             | Fe I  | $3d^7(^4F)4s$          | $3d^7(^4F)4p$           | [2]       |
| 680 | 396.659         | 457              | 396.64992             | Fe I  | $3d^6(^5D)4s4p(^3P^o)$ | $3d^6(^5D)4s(^6D)4d$    | [2]       |
| 681 | 396.741         | 162              | 396.74204             | Fe I  | $3d^7(^2H)4s$          | $3d^7(^2H)4p$           | [2]       |
| 682 | 396.799         | 87               | 396.79611             | Fe I  | $3d^6(^5D)4s4p(^3P^o)$ | $3d^6(^5D)4s(^6D)4d$    | [2]       |
| 683 | 396.928         | 14580            | 396.9257              | Fe I  | $3d^7(^4F)4s$          | $3d^7(^4F)4p$           | [2]       |
| 684 | 397.139         | 152              | 397.13224             | Fe I  | $3d^7(^2G)4s$          | $3d^6(^3F2)4s4p(^3P^o)$ | [2]       |
| 685 | 397.35          | 53               | 397.3649              | Fe I  | $3d^7(^2D2)4s$         | $3d^7(^2D2)4p$          | [2]       |
| 686 | 397.373         | 38               | 397.3649              | Fe I  | $3d^7(^2D2)4s$         | $3d^7(^2D2)4p$          | [2]       |
| 687 | 397.584         | 36               | 397.5841              | Fe I  | $3d^7(^2D2)4s$         | $3d^6(^3G)4s4p(^3P^o)$  | [2]       |
| 688 | 397.772         | 494              | 397.77407             | Fe I  | $3d^7(^4P)4s$          | $3d^6(^3P2)4s4p(^3P^o)$ | [2]       |
| 689 | 398.182         | 236              | 398.17708             | Fe I  | $3d^7(^2G)4s$          | $3d^6(^3H)4s4p(^3P^o)$  | [2]       |
| 690 | 398.393         | 184              | 398.39561             | Fe I  | $3d^7(^2G)4s$          | $3d^6(^3F2)4s4p(^3P^o)$ | [2]       |
| 691 | 398.99          | 59               | 398.98569             | Fe I  | $3d^7(^2D2)4s$         | $3d^7(^4F)5p$           | [2]       |
| 692 | 399.025         | 152              | 399.03731             | Fe I  | $3d^7(^2G)4s$          | $3d^7(^2G)4p$           | [2]       |
| 693 | 399.411         | 26               | 399.41129             | Fe I  | $3d^7(^2G)4s$          | $3d^7(^2G)4p$           | [2]       |
| 694 | 399.704         | 128              | 399.69636             | Fe I  | $3d^64s^2$             | $3d^6(^3G)4s4p(^3P^o)$  | [2]       |
| 695 | 399.809         | 260              | 399.80525             | Fe I  | $3d^7(^2G)4s$          | $3d^7(^4P)4p$           | [2]       |
| 696 | 400.172         | 62               | 400.16615             | Fe I  | $3d^7(^4P)4s$          | $3d^6(^3P2)4s4p(^3P^o)$ | [2]       |
| 697 | 400.523         | 5757             | 400.52417             | Fe I  | $3d^7(^4F)4s$          | $3d^7(^4F)4p$           | [2]       |
| 698 | 400.734         | 61               | 400.72718             | Fe I  | $3d^7(^2G)4s$          | $3d^6(^3F2)4s4p(^3P^o)$ | [2]       |

| No. | Wavelength (nm) | Intensity (a.u.) | Wavelength (nm), Ref. | Type  | Lower energy level     | Higher energy level     | Reference |
|-----|-----------------|------------------|-----------------------|-------|------------------------|-------------------------|-----------|
| 699 | 401.459         | 411              | 401.45306             | Fe I  | $3d^7(^2G)4s$          | $3d^6(^3F2)4s4p(^3P^o)$ | [2]       |
| 700 | 401.564         | 161              | 401.5606              | Fe I  | $3d^7(^4F)4p$          | $3d^7(^4F)5d$           | [2]       |
| 701 | 401.634         | 23               | 401.64191             | Fe I  | $3d^6(^5D)4s4p(^3P^o)$ | $3d^6(^5D)4s(^6D)4d$    | [2]       |
| 702 | 401.751         | 28               | 401.74616             | Fe I  | $3d^6(^5D)4s4p(^3P^o)$ |                         | [2]       |
| 703 | 401.822         | 34               | 401.82673             | Fe I  | $3d^6(^5D)4s4p(^3P^o)$ | $3d^6(^5D)4s(^6D)4d$    | [2]       |
| 704 | 402.184         | 496              | 402.1866              | Fe I  | $3d^7(^2G)4s$          | $3d^6(^3H)4s4p(^3P^o)$  | [2]       |
| 705 | 402.476         | 155              | 402.47248             | Fe I  | $3d^6(^5D)4s4p(^3P^o)$ | $3d^6(^5D)4s(^6D)4d$    | [2]       |
| 706 | 402.956         | 140              | 402.9629              | Fe I  | $3d^6(^5D)4s4p(^3P^o)$ | $3d^6(^5D)4s(^6D)4d$    | [2]       |
| 707 | 403.201         | 81               | 403.19604             | Fe I  | $3d^7(^2D2)4s$         | $3d^7(^2D2)4p$          | [2]       |
| 708 | 403.306         | 3713             | 403.31861             | Fe I  | $3d^64s^2$             | $3d^6(^3H)4s4p(^3P^o)$  | [2]       |
| 709 | 403.996         | 62               | 403.9938              | Fe I  | $3d^7(^2G)4s$          | $3d^7(^4P)4p$           | [2]       |
| 710 | 404.066         | 68               | 404.06379             | Fe I  | $3d^7(^2D2)4s$         | $3d^7(^2D2)4p$          | [2]       |
| 711 | 404.58          | 65527            | 404.58122             | Fe I  | $3d^7(^4F)4s$          | $3d^7(^4F)4p$           | [2]       |
| 712 | 405.502         | 78               | 405.50352             | Fe I  | $3d^64s^2$             | $3d^6(^3H)4s4p(^3P^o)$  | [2]       |
| 713 | 405.747         | 315              | 405.73433             | Fe I  | $3d^7(^2G)4s$          | $3d^6(^3F2)4s4p(^3P^o)$ | [2]       |
| 714 | 405.817         | 55               | 405.8217              | Fe I  | $3d^6(^5D)4s4p(^3P^o)$ | $3d^6(^5D)4s(^6D)4d$    | [2]       |
| 715 | 406.249         | 254              | 406.24406             | Fe I  | $3d^7(^4P)4s$          | $3d^7(^4P)4p$           | [2]       |
| 716 | 406.541         | 27               | 406.53809             | Fe I  | $3d^6(^5D)4s4p(^3P^o)$ | $3d^6(^5D)4s(^4D)5s$    | [2]       |
| 717 | 406.692         | 208              | 406.69739             | Fe I  | $3d^7(^4P)4s$          | $3d^6(^3P2)4s4p(^3P^o)$ | [2]       |
| 718 | 406.727         | 122              | 406.72709             | Fe I  | $3d^64s^2$             | $3d^6(^3P2)4s4p(^3P^o)$ | [2]       |
| 719 | 406.797         | 429              | 406.79775             | Fe I  | $3d^6(^5D)4s4p(^3P^o)$ | $3d^6(^5D)4s(^6D)4d$    | [2]       |
| 720 | 406.961         | 65               | 406.961               | Fe II | $3d^5(^4P)4s4p(^3P^o)$ | $3d^6(^5D)6d$           | [1]       |
| 721 | 407.077         | 167              | 407.07705             | Fe I  | $3d^6(^5D)4s4p(^3P^o)$ | $3d^6(^5D)4s(^6D)4d$    | [2]       |
| 722 | 407.171         | 48201            | 407.17377             | Fe I  | $3d^7(^4F)4s$          | $3d^7(^4F)4p$           | [2]       |
| 723 | 407.252         | 42               | 407.25021             | Fe I  | $3d^6(^5D)4s4p(^3P^o)$ | $3d^6(^5D)4s(^4D)5s$    | [2]       |
| 724 | 407.381         | 405              | 407.3762              | Fe I  | $3d^6(^5D)4s4p(^3P^o)$ | $3d^6(^5D)4s(^6D)4d$    | [2]       |
| 725 | 407.474         | 102              | 407.4786              | Fe I  | $3d^7(^2G)4s$          | $3d^7(^2G)4p$           | [2]       |
| 726 | 407.836         | 66               | 407.83536             | Fe I  | $3d^64s^2$             | $3d^6(^3P2)4s4p(^3P^o)$ | [2]       |
| 727 | 407.917         | 33               | 407.91678             | Fe I  | $3d^6(^5D)4s4p(^3P^o)$ | $3d^6(^5D)4s(^6D)4d$    | [2]       |
| 728 | 407.987         | 56               | 407.98377             | Fe I  | $3d^7(^4P)4s$          | $3d^7(^4P)4p$           | [2]       |
| 729 | 408.022         | 53               | 408.02089             | Fe I  | $3d^6(^5D)4s4p(^3P^o)$ | $3d^6(^5D)4s(^6D)4d$    | [2]       |
| 730 | 408.36          | 42               | 408.35489             | Fe I  | $3d^64s^2$             | $3d^6(^3P2)4s4p(^3P^o)$ | [2]       |
| 731 | 408.454         | 200              | 408.44913             | Fe I  | $3d^6(^5D)4s4p(^3P^o)$ | $3d^6(^5D)4s(^4D)5s$    | [2]       |
| 732 | 408.5           | 126              | 408.50038             | Fe I  | $3d^7(^4P)4s$          | $3d^6(^3P2)4s4p(^3P^o)$ | [2]       |
| 733 | 408.71          | 26               | 408.70936             | Fe I  | $3d^6(^5D)4s4p(^3P^o)$ | $3d^6(^5D)4s(^6D)4d$    | [2]       |

| No. | Wavelength (nm) | Intensity (a.u.) | Wavelength (nm), Ref. | Type  | Lower energy level     | Higher energy level      | Reference |
|-----|-----------------|------------------|-----------------------|-------|------------------------|--------------------------|-----------|
| 734 | 408.92          | 50               | 408.92166             | Fe I  | $3d^6 4s^2$            | $3d^6(^3G)4s4p(^3P^o)$   | [2]       |
| 735 | 409.153         | 35               | 409.15528             | Fe I  | $3d^7(^4P)4s$          | $3d^7(^4P)4p$            | [2]       |
| 736 | 409.235         | 37               | 409.22767             | Fe I  | $3d^6 4s^2$            | $3d^6(^3G)4s4p(^3P^o)$   | [2]       |
| 737 | 409.817         | 113              | 409.81755             | Fe I  | $3d^6(^5D)4s4p(^3P^o)$ | $3d^6(^5D)4s(^6D)4d$     | [2]       |
| 738 | 410.074         | 267              | 410.07376             | Fe I  | $3d^7(^4F)4s$          | $3d^6(^5D)4s4p(^3P^o)$   | [2]       |
| 739 | 410.12          | 41               | 410.12608             | Fe I  | $3d^6(^5D)4s4p(^3P^o)$ | $3d^6(^5D)4s(^4D)5s$     | [2]       |
| 740 | 410.446         | 26               | 410.446               | Fe I  | $3d^6 4s^2$            | $3d^6(^3G)4s4p(^3P^o)$   | [2]       |
| 741 | 410.54          | 40               | 410.5365              | Fe II | $3d^5(^6S)4s4p(^1P^o)$ | $3d^6(^3P_2)4d$          | [1]       |
| 742 | 410.749         | 255              | 410.74881             | Fe I  | $3d^7(^4P)4s$          | $3d^7(^4P)4p$            | [2]       |
| 743 | 410.982         | 139              | 410.98015             | Fe I  | $3d^7(^4P)4s$          | $3d^7(^4P)4p$            | [2]       |
| 744 | 411.855         | 1027             | 411.85447             | Fe I  | $3d^7(^2H)4s$          | $3d^7(^2H)4p$            | [2]       |
| 745 | 412.018         | 164              | 412.02062             | Fe I  | $3d^6 4s^2$            | $3d^7(^2G)4p$            | [2]       |
| 746 | 412.182         | 73               | 412.18024             | Fe I  | $3d^7(^4P)4s$          | $3d^6(^3F_2)4s4p(^3P^o)$ | [2]       |
| 747 | 412.568         | 36               | 412.5617              | Fe I  | $3d^7(^4F)4p$          | $3d^6(^5D)4s(^4D)4d$     | [2]       |
| 748 | 412.614         | 94               | 412.61824             | Fe I  | $3d^6(^5D)4s4p(^3P^o)$ | $3d^6(^5D)4s(^6D)4d$     | [2]       |
| 749 | 413.292         | 178              | 413.28989             | Fe I  | $3d^7(^4P)4s$          | $3d^7(^4P)4p$            | [2]       |
| 750 | 413.385         | 68               | 413.38554             | Fe I  | $3d^6(^5D)4s4p(^3P^o)$ | $3d^6(^5D)4s(^4D)5s$     | [2]       |
| 751 | 413.467         | 635              | 413.46773             | Fe I  | $3d^7(^4P)4s$          | $3d^7(^4P)4p$            | [2]       |
| 752 | 413.701         | 183              | 413.69974             | Fe I  | $3d^7(^2P)4s$          | $3d^7(^2P)4p$            | [2]       |
| 753 | 413.992         | 57               | 413.9927              | Fe I  | $3d^7(^4F)4s$          | $3d^6(^5D)4s4p(^3P^o)$   | [2]       |
| 754 | 414.179         | 34               | 414.1863              | Fe I  | $3d^6 4s^2$            | $3d^6(^3G)4s4p(^3P^o)$   | [2]       |
| 755 | 414.389         | 13928            | 414.38678             | Fe I  | $3d^7(^4F)4s$          | $3d^7(^4F)4p$            | [2]       |
| 756 | 414.529         | 49               | 414.5199              | Fe I  | $3d^7(^2G)4s$          | $3d^6(^3F_2)4s4p(^3P^o)$ | [2]       |
| 757 | 414.611         | 65               | 414.60639             | Fe I  | $3d^6 4s^2$            | $3d^6(^3G)4s4p(^3P^o)$   | [2]       |
| 758 | 414.763         | 74               | 414.76687             | Fe I  | $3d^7(^4F)4s$          | $3d^7(^4F)4p$            | [2]       |
| 759 | 414.938         | 88               | 414.93648             | Fe I  | $3d^6(^5D)4s4p(^3P^o)$ | $3d^6(^5D)4s(^6D)4d$     | [2]       |
| 760 | 415.218         | 169              | 415.21689             | Fe I  | $3d^7(^4F)4s$          | $3d^6(^5D)4s4p(^3P^o)$   | [2]       |
| 761 | 415.393         | 487              | 415.38994             | Fe I  | $3d^6(^5D)4s4p(^3P^o)$ | $3d^6(^5D)4s(^6D)4d$     | [2]       |
| 762 | 415.452         | 427              | 415.44984             | Fe I  | $3d^7(^4P)4s$          | $3d^6(^3P_2)4s4p(^3P^o)$ | [2]       |
| 763 | 415.475         | 309              | 415.48052             | Fe I  | $3d^6(^5D)4s4p(^3P^o)$ | $3d^6(^5D)4s(^6D)4d$     | [2]       |
| 764 | 415.778         | 364              | 415.77798             | Fe I  | $3d^6(^5D)4s4p(^3P^o)$ | $3d^6(^5D)4s(^6D)4d$     | [2]       |
| 765 | 416.105         | 45               | 416.10766             | Fe I  | $3d^6(^5D)4s4p(^3P^o)$ | $3d^6(^5D)4s(^6D)4d$     | [2]       |
| 766 | 416.77          | 28               | 416.7574              | Fe II | $3d^6(^5D)5p$          | $3d^6(^5D)6d$            | [1]       |
| 767 | 417.166         | 46               | 417.16905             | Fe I  | $3d^6 4s^2$            | $3d^7(^2D_2)4p$          | [2]       |
| 768 | 417.388         | 99               | 417.39205             | Fe I  | $3d^7(^4F)4s$          | $3d^6(^5D)4s4p(^3P^o)$   | [2]       |

| No. | Wavelength (nm) | Intensity (a.u.) | Wavelength (nm), Ref. | Type  | Lower energy level     | Higher energy level      | Reference |
|-----|-----------------|------------------|-----------------------|-------|------------------------|--------------------------|-----------|
| 769 | 417.493         | 457              | 417.49128             | Fe I  | $3d^7(^4F)4s$          | $3d^6(^5D)4s4p(^3P^o)$   | [2]       |
| 770 | 417.563         | 372              | 417.56358             | Fe I  | $3d^7(^4P)4s$          | $3d^7(^4P)4p$            | [2]       |
| 771 | 417.656         | 245              | 417.65656             | Fe I  | $3d^6(^5D)4s4p(^3P^o)$ | $3d^6(^5D)4s(^6D)4d$     | [2]       |
| 772 | 417.761         | 371              | 417.75936             | Fe I  | $3d^7(^4F)4s$          | $3d^6(^5D)4s4p(^3P^o)$   | [2]       |
| 773 | 418.705         | 1489             | 418.70387             | Fe I  | $3d^6(^5D)4s4p(^3P^o)$ | $3d^6(^5D)4s(^6D)5s$     | [2]       |
| 774 | 418.775         | 1919             | 418.77952             | Fe I  | $3d^6(^5D)4s4p(^3P^o)$ | $3d^6(^5D)4s(^6D)5s$     | [2]       |
| 775 | 418.868         | 72               | 418.87313             | Fe I  | $3d^7(^4F)4p$          | $3d^7(^4F)5d$            | [2]       |
| 776 | 419.136         | 690              | 419.14304             | Fe I  | $3d^6(^5D)4s4p(^3P^o)$ | $3d^6(^5D)4s(^6D)5s$     | [2]       |
| 777 | 419.358         | 26               | 419.36039             | Fe I  | $3d^64s^2$             | $3d^6(^3H)4s4p(^3P^o)$   | [2]       |
| 778 | 419.532         | 430              | 419.53288             | Fe I  | $3d^6(^5D)4s4p(^3P^o)$ | $3d^6(^5D)4s(^6D)4d$     | [2]       |
| 779 | 419.625         | 105              | 419.62081             | Fe I  | $3d^6(^5D)4s4p(^3P^o)$ | $3d^6(^5D)4s(^6D)4d$     | [2]       |
| 780 | 419.719         | 25               | 419.7097              | Fe I  | $3d^7(^4F)4s$          | $3d^6(^5D)4s4p(^3P^o)$   | [2]       |
| 781 | 419.905         | 5373             | 419.9095              | Fe I  | $3d^7(^2G)4s$          | $3d^7(^2G)4p$            | [2]       |
| 782 | 419.998         | 58               | 419.99832             | Fe I  | $3d^64s^2$             | $3d^6(^5D)4s4p(^3P^o)$   | [2]       |
| 783 | 420.196         | 5497             | 420.20289             | Fe I  | $3d^7(^4F)4s$          | $3d^7(^4F)4p$            | [2]       |
| 784 | 420.278         | 31               | 420.27527             | Fe I  | $3d^7(^2G)4s$          | $3d^6(^3G)4s4p(^3P^o)$   | [2]       |
| 785 | 420.662         | 665              | 420.66964             | Fe I  | $3d^64s^2$             | $3d^6(^5D)4s4p(^3P^o)$   | [2]       |
| 786 | 420.72          | 60               | 420.71268             | Fe I  | $3d^7(^4P)4s$          | $3d^6(^3P_2)4s4p(^3P^o)$ | [2]       |
| 787 | 420.86          | 82               | 420.86038             | Fe I  | $3d^6(^5D)4s4p(^3P^o)$ | $3d^6(^5D)4s(^6D)4d$     | [2]       |
| 788 | 421.361         | 83               | 421.36471             | Fe I  | $3d^7(^4P)4s$          | $3d^6(^3P_2)4s4p(^3P^o)$ | [2]       |
| 789 | 421.617         | 14099            | 421.61835             | Fe I  | $3d^64s^2$             | $3d^6(^5D)4s4p(^3P^o)$   | [2]       |
| 790 | 421.756         | 213              | 421.75453             | Fe I  | $3d^6(^5D)4s4p(^3P^o)$ | $3d^6(^5D)4s(^6D)4d$     | [2]       |
| 791 | 422.036         | 40               | 422.03414             | Fe I  | $3d^7(^2P)4s$          | $3d^7(^4P)4p$            | [2]       |
| 792 | 422.222         | 494              | 422.22128             | Fe I  | $3d^6(^5D)4s4p(^3P^o)$ | $3d^6(^5D)4s(^6D)5s$     | [2]       |
| 793 | 422.455         | 54               | 422.45125             | Fe I  | $3d^6(^5D)4s4p(^3P^o)$ | $3d^6(^5D)4s(^6D)4d$     | [2]       |
| 794 | 422.548         | 242              | 422.5454              | Fe I  | $3d^6(^5D)4s4p(^3P^o)$ | $3d^6(^5D)4s(^6D)4d$     | [2]       |
| 795 | 422.746         | 5545             | 422.74263             | Fe I  | $3d^6(^5D)4s4p(^3P^o)$ | $3d^6(^5D)4s(^6D)4d$     | [2]       |
| 796 | 422.862         | 25               | 422.8718              | Fe I  | $3d^6(^5D)4s4p(^3P^o)$ | $3d^6(^5D)4s(^6D)4d$     | [2]       |
| 797 | 423.269         | 57               | 423.2726              | Fe I  | $3d^64s^2$             | $3d^6(^5D)4s4p(^3P^o)$   | [2]       |
| 798 | 423.362         | 1338             | 423.36025             | Fe I  | $3d^6(^5D)4s4p(^3P^o)$ | $3d^6(^5D)4s(^6D)5s$     | [2]       |
| 799 | 423.711         | 40               | 423.70739             | Fe I  | $3d^7(^4F)4s$          | $3d^6(^5D)4s4p(^3P^o)$   | [2]       |
| 800 | 423.804         | 95               | 423.80235             | Fe I  | $3d^6(^5D)4s4p(^3P^o)$ | $3d^6(^5D)4s(^6D)4d$     | [2]       |
| 801 | 423.885         | 665              | 423.88097             | Fe I  | $3d^6(^5D)4s4p(^3P^o)$ | $3d^6(^5D)4s(^6D)4d$     | [2]       |
| 802 | 423.944         | 114              | 423.9361              | Fe I  | $3d^64s^2$             | $3d^6(^3G)4s4p(^3P^o)$   | [2]       |
| 803 | 424.013         | 78               | 424.01067             | Fe II | $3d^6(^3H)4d$          | $3d^6(^3G_4)4f$          | [1]       |

| No. | Wavelength (nm) | Intensity (a.u.) | Wavelength (nm), Ref. | Type  | Lower energy level     | Higher energy level    | Reference |
|-----|-----------------|------------------|-----------------------|-------|------------------------|------------------------|-----------|
| 804 | 424.746         | 853              | 424.74253             | Fe I  | $3d^6(^5D)4s4p(^3P^o)$ | $3d^6(^5D)4s(^6D)4d$   | [2]       |
| 805 | 424.816         | 44               | 424.82238             | Fe I  | $3d^7(^2P)4s$          | $3d^7(^4P)4p$          | [2]       |
| 806 | 424.851         | 25               | 424.84023             | Fe I  | $3d^7(^4F)4s$          | $3d^6(^5D)4s4p(^3P^o)$ | [2]       |
| 807 | 425.78          | 46               | 425.7921              | Fe II | $3d^5(^4P)4s4p(^3P^o)$ | $3d^6(^5D)7s$          | [1]       |
| 808 | 426.048         | 36792            | 426.04741             | Fe I  | $3d^6(^5D)4s4p(^3P^o)$ | $3d^6(^5D)4s(^6D)5s$   | [2]       |
| 809 | 426.419         | 40               | 426.42032             | Fe I  | $3d^6(^5D)4s4p(^3P^o)$ | $3d^6(^5D)4s(^6D)4d$   | [2]       |
| 810 | 426.698         | 62               | 426.69642             | Fe I  | $3d^7(^2G)4s$          | $3d^6(^3H)4s4p(^3P^o)$ | [2]       |
| 811 | 426.779         | 82               | 426.78262             | Fe I  | $3d^7(^2P)4s$          | $3d^7(^4P)4p$          | [2]       |
| 812 | 426.861         | 40               | 426.87485             | Fe I  | $3d^7(^2D)4s$          | $3d^7(^2P)4p$          | [2]       |
| 813 | 427.116         | 6014             | 427.11535             | Fe I  | $3d^6(^5D)4s4p(^3P^o)$ | $3d^6(^5D)4s(^6D)5s$   | [2]       |
| 814 | 427.174         | 57350            | 427.17602             | Fe I  | $3d^7(^4F)4s$          | $3d^7(^4F)4p$          | [2]       |
| 815 | 427.383         | 31               | 427.38682             | Fe I  | $3d^7(^2P)4s$          | $3d^5(^6S)4s^24p$      | [2]       |
| 816 | 427.558         | 37               | 427.5698              | Fe I  | $3d^64s^2$             | $3d^6(^3F)4s4p(^3P^o)$ | [2]       |
| 817 | 427.999         | 28               | 427.987               | Fe I  | $3d^7(^4P)4s$          | $3d^7(^4P)4p$          | [2]       |
| 818 | 428.243         | 3734             | 428.24026             | Fe I  | $3d^7(^4P)4s$          | $3d^6(^3P)4s4p(^3P^o)$ | [2]       |
| 819 | 428.544         | 39               | 428.54417             | Fe I  | $3d^7(^2H)4s$          | $3d^7(^2G)4p$          | [2]       |
| 820 | 428.649         | 93               | 428.6434              | Fe I  | $3d^64s^2$             | $3d^6(^3H)4s4p(^3P^o)$ | [2]       |
| 821 | 428.788         | 214              | 428.7938              | Fe I  | $3d^6(^5D)4s4p(^3P^o)$ | $3d^6(^5D)4s(^6D)4d$   | [2]       |
| 822 | 428.823         | 30               | 428.81455             | Fe I  | $3d^7(^2G)4s$          | $3d^6(^3H)4s4p(^3P^o)$ | [2]       |
| 823 | 428.974         | 62               | 428.97755             | Fe II | $3d^6(^3P)5p$          | $3d^6(^5D)6d$          | [1]       |
| 824 | 429.043         | 87               | 429.03786             | Fe I  | $3d^64s^2$             | $3d^6(^3G)4s4p(^3P^o)$ | [2]       |
| 825 | 429.067         | 60               | 429.0595              | Fe II | $3d^6(^1D)4p$          | $3d^6(^5D)6s$          | [1]       |
| 826 | 429.148         | 933              | 429.14634             | Fe I  | $3d^64s^2$             | $3d^6(^5D)4s4p(^3P^o)$ | [2]       |
| 827 | 429.658         | 33               | 429.6567              | Fe II | $3d^6(^3P)4s$          | $3d^6(^5D)4p$          | [5]       |
| 828 | 429.809         | 73               | 429.80362             | Fe I  | $3d^7(^2G)4s$          | $3d^6(^3F)4s4p(^3P^o)$ | [2]       |
| 829 | 430.215         | 34               | 430.21855             | Fe I  | $3d^7(^2G)4s$          | $3d^6(^3F)4s4p(^3P^o)$ | [2]       |
| 830 | 430.552         | 62               | 430.54502             | Fe I  | $3d^7(^2P)4s$          | $3d^7(^4P)4p$          | [2]       |
| 831 | 430.795         | 50254            | 430.7902              | Fe I  | $3d^7(^4F)4s$          | $3d^7(^4F)4p$          | [2]       |
| 832 | 430.9           | 38               | 430.90304             | Fe I  | $3d^64s^2$             | $3d^7(^2H)4p$          | [2]       |
| 833 | 431.027         | 26               | 431.0374              | Fe I  | $3d^6(^5D)4s4p(^3P^o)$ | $3d^7(^4F)4d$          | [2]       |
| 834 | 431.514         | 1633             | 431.50843             | Fe I  | $3d^7(^4P)4s$          | $3d^6(^3P)4s4p(^3P^o)$ | [2]       |
| 835 | 432.047         | 47               | 432.0483              | Fe I  | $3d^6(^5D)4s4p(^3P^o)$ | $3d^6(^5D)4s(^6D)4d$   | [2]       |
| 836 | 432.709         | 87               | 432.70953             | Fe I  | $3d^7(^2D)4s$          | $3d^7(^2P)4p$          | [2]       |
| 837 | 433.708         | 211              | 433.7046              | Fe I  | $3d^7(^4F)4s$          | $3d^7(^4F)4p$          | [2]       |
| 838 | 434.172         | 38               | 434.1813              | Fe I  | $3d^7(^2D)4s$          | $3d^6(^5D)4s(^6D)5p$   | [2]       |



| No. | Wavelength (nm) | Intensity (a.u.) | Wavelength (nm), Ref. | Type  | Lower energy level     | Higher energy level     | Reference |
|-----|-----------------|------------------|-----------------------|-------|------------------------|-------------------------|-----------|
| 839 | 434.369         | 35               | 434.36972             | Fe I  | $3d^7(^2G)4s$          | $3d^6(^3G)4s4p(^3P^o)$  | [2]       |
| 840 | 434.439         | 60               | 434.44993             | Fe I  | $3d^6(^5D)4s4p(^3P^o)$ | $3d^6(^5D)4s(^6D)4d$    | [2]       |
| 841 | 434.497         | 47               | 434.489               | Fe I  | $3d^7(^4F)4p$          | $3d^7(^4F)6s$           | [2]       |
| 842 | 435.17          | 50               | 435.17629             | Fe II | $3d^6(^3P2)4s$         | $3d^6(^5D)4p$           | [1]       |
| 843 | 435.274         | 592              | 435.27344             | Fe I  | $3d^7(^4P)4s$          | $3d^6(^3P2)4s4p(^3P^o)$ | [2]       |
| 844 | 436.573         | 34               | 436.5744              | Fe II | $3d^6(^5D)4d$          | $3d^6(^5D)6p$           | [1]       |
| 845 | 436.758         | 109              | 436.75782             | Fe I  | $3d^64s^2$             | $3d^6(^3H)4s4p(^3P^o)$  | [2]       |
| 846 | 436.979         | 543              | 436.97715             | Fe I  | $3d^7(^2G)4s$          | $3d^7(^2G)4p$           | [2]       |
| 847 | 438.357         | 65527            | 438.35447             | Fe I  | $3d^7(^4F)4s$          | $3d^7(^4F)4p$           | [2]       |
| 848 | 438.462         | 70               | 438.46719             | Fe I  | $3d^7(^2P)4s$          | $3d^7(^4P)4p$           | [2]       |
| 849 | 438.786         | 62               | 438.78909             | Fe I  | $3d^7(^2P)4s$          | $3d^7(^4P)4p$           | [2]       |
| 850 | 438.844         | 227              | 438.84065             | Fe I  | $3d^6(^5D)4s4p(^3P^o)$ | $3d^6(^5D)4s(^6D)4d$    | [2]       |
| 851 | 439.052         | 448              | 439.04477             | Fe I  | $3d^64s^2$             | $3d^6(^3F2)4s4p(^3P^o)$ | [2]       |
| 852 | 439.099         | 72               | 439.09502             | Fe I  | $3d^64s^2$             | $3d^6(^3H)4s4p(^3P^o)$  | [2]       |
| 853 | 439.573         | 51               | 439.58141             | Fe II | $3d^6(^5D)5p$          | $3d^6(^5D)7s$           | [1]       |
| 854 | 439.805         | 267              | 439.7912              | Fe II | $3d^6(^3P1)4s$         | $3d^6(^3D)4p$           | [1]       |
| 855 | 439.978         | 48               | 439.9803              | Fe II | $3d^6(^5D)5p$          | $3d^6(^5D)7s$           | [1]       |
| 856 | 440.129         | 87               | 440.12896             | Fe I  | $3d^6(^5D)4s4p(^3P^o)$ | $3d^6(^5D)4s(^4D)5s$    | [2]       |
| 857 | 440.302         | 51               | 440.2879              | Fe II | $3d^6(^3P1)4s$         | $3d^6(^3D)4p$           | [1]       |
| 858 | 440.476         | 51956            | 440.47501             | Fe I  | $3d^7(^4F)4s$          | $3d^7(^4F)4p$           | [2]       |
| 859 | 440.846         | 77               | 440.84132             | Fe I  | $3d^7(^4P)4s$          | $3d^6(^5D)4s4p(^1P^o)$  | [2]       |
| 860 | 441.367         | 74               | 441.36                | Fe II | $3d^6(^3H)4s$          | $3d^6(^5D)4p$           | [5]       |
| 861 | 441.517         | 5999             | 441.51222             | Fe I  | $3d^7(^4F)4s$          | $3d^7(^4F)4p$           | [2]       |
| 862 | 441.679         | 44               | 441.6818              | Fe II | $3d^6(^3P2)4s$         | $3d^6(^5D)4p$           | [1]       |
| 863 | 441.829         | 40               | 441.8419              | Fe I  | $3d^64s^2$             | $3d^7(^4P)4p$           | [2]       |
| 864 | 442.257         | 271              | 442.25678             | Fe I  | $3d^7(^4P)4s$          | $3d^6(^3P2)4s4p(^3P^o)$ | [2]       |
| 865 | 442.431         | 89               | 442.41876             | Fe I  | $3d^7(^2D2)4s$         | $3d^7(^2D2)4p$          | [2]       |
| 866 | 442.731         | 25575            | 442.73096             | Fe I  | $3d^64s^2$             | $3d^6(^5D)4s4p(^3P^o)$  | [2]       |
| 867 | 442.858         | 327              | 442.8567              | Fe I  | $3d^6(^5D)4s4p(^3P^o)$ | $3d^7(^4F)4d$           | [2]       |
| 868 | 443.066         | 84               | 443.06137             | Fe I  | $3d^7(^4P)4s$          | $3d^6(^5D)4s4p(^1P^o)$  | [2]       |
| 869 | 443.321         | 138              | 443.32184             | Fe I  | $3d^6(^5D)4s4p(^3P^o)$ | $3d^6(^5D)4s(^6D)4d$    | [2]       |
| 870 | 443.378         | 66               | 443.37821             | Fe I  | $3d^6(^5D)4s4p(^3P^o)$ | $3d^6(^5D)4s(^6D)4d$    | [2]       |
| 871 | 443.69          | 36               | 443.69203             | Fe I  | $3d^7(^2G)4s$          | $3d^6(^3H)4s4p(^3P^o)$  | [2]       |
| 872 | 443.991         | 69               | 443.98805             | Fe I  | $3d^64s^2$             | $3d^6(^3P2)4s4p(^3P^o)$ | [2]       |
| 873 | 444.152         | 51               | 444.1545              | Fe I  | $3d^6(^5D)4s4p(^3P^o)$ | $3d^7(^4F)4d$           | [2]       |

| No. | Wavelength (nm) | Intensity (a.u.) | Wavelength (nm), Ref. | Type  | Lower energy level     | Higher energy level     | Reference |
|-----|-----------------|------------------|-----------------------|-------|------------------------|-------------------------|-----------|
| 874 | 444.233         | 189              | 444.23387             | Fe I  | $3d^7(^4P)4s$          | $3d^6(^5D)4s4p(^1P^o)$  | [2]       |
| 875 | 444.279         | 105              | 444.28313             | Fe I  | $3d^7(^4P)4s$          | $3d^5(^6S)4s^24p$       | [2]       |
| 876 | 444.545         | 63               | 444.54712             | Fe I  | $3d^64s^2$             | $3d^6(^5D)4s4p(^3P^o)$  | [2]       |
| 877 | 444.637         | 49               | 444.64398             | Fe II | $3d^5(^4D)4s4p(^3P^o)$ | $3d^6(^5D)6d$           | [1]       |
| 878 | 444.718         | 47               | 444.71301             | Fe I  | $3d^7(^4P)4s$          | $3d^5(^6S)4s^24p$       | [2]       |
| 879 | 444.857         | 58               | 444.85281             | Fe II | $3d^6(^5D)5p$          | $3d^6(^5D)7s$           | [1]       |
| 880 | 444.949         | 37               | 444.961               | Fe II | $3d^6(^3F2)4p$         | $3d^6(^5D)4d$           | [1]       |
| 881 | 445.076         | 49               | 445.0767              | Fe I  | $3d^6(^5D)4s4p(^3P^o)$ | $3d^7(^4F)4d$           | [2]       |
| 882 | 445.157         | 81               | 445.1542              | Fe II | $3d^6(^3P1)4s$         | $3d^6(^3D)4p$           | [1]       |
| 883 | 445.261         | 102              | 445.2609              | Fe I  | $3d^6(^5D)4s4p(^3P^o)$ | $3d^7(^4F)4d$           | [2]       |
| 884 | 445.434         | 140              | 445.43807             | Fe I  | $3d^7(^4P)4s$          | $3d^6(^3P2)4s4p(^3P^o)$ | [2]       |
| 885 | 445.503         | 215              | 445.5027              | Fe I  | $3d^6(^5D)4s4p(^3P^o)$ | $3d^7(^4F)4d$           | [2]       |
| 886 | 445.63          | 52               | 445.63254             | Fe I  | $3d^7(^2G)4s$          | $3d^6(^3H)4s4p(^3P^o)$  | [2]       |
| 887 | 445.907         | 254              | 445.91173             | Fe I  | $3d^7(^4P)4s$          | $3d^6(^5D)4s4p(^1P^o)$  | [2]       |
| 888 | 446.658         | 1203             | 446.65515             | Fe I  | $3d^7(^4P)4s$          | $3d^6(^3P2)4s4p(^3P^o)$ | [2]       |
| 889 | 446.934         | 383              | 446.93753             | Fe I  | $3d^6(^5D)4s4p(^3P^o)$ | $3d^6(^5D)4s(^6D)4d$    | [2]       |
| 890 | 447.107         | 42               | 447.11125             | Fe II | $3d^6(^5D)4d$          | $3d^6(^3H)5p$           | [1]       |
| 891 | 447.154         | 41               | 447.1677              | Fe I  | $3d^64s^2$             | $3d^6(^5D)4s4p(^3P^o)$  | [2]       |
| 892 | 447.73          | 82               | 447.736               | Fe II | $3d^5(^4D)4s4p(^3P^o)$ | $3d^6(^5D)6d$           | [1]       |
| 893 | 447.961         | 48               | 447.96025             | Fe I  | $3d^64s^2$             | $3d^6(^3H)4s4p(^3P^o)$  | [2]       |
| 894 | 448.272         | 59               | 448.2739              | Fe I  | $3d^6(^5D)4s4p(^3P^o)$ | $3d^6(^5D)4s(^4D)5s$    | [2]       |
| 895 | 448.422         | 190              | 448.42195             | Fe I  | $3d^6(^5D)4s4p(^3P^o)$ | $3d^6(^5D)4s(^4D)5s$    | [2]       |
| 896 | 448.56          | 65               | 448.56753             | Fe I  | $3d^6(^5D)4s4p(^3P^o)$ | $3d^6(^5D)4s(^6D)4d$    | [2]       |
| 897 | 448.768         | 45               | 448.7736              | Fe I  | $3d^7(^2H)4s$          | $3d^7(^2G)4p$           | [2]       |
| 898 | 448.975         | 494              | 448.97388             | Fe I  | $3d^64s^2$             | $3d^6(^5D)4s4p(^3P^o)$  | [2]       |
| 899 | 449.01          | 74               | 449.00837             | Fe I  | $3d^7(^2P)4s$          | $3d^6(^3P2)4s4p(^3P^o)$ | [2]       |
| 900 | 449.586         | 46               | 449.59528             | Fe I  | $3d^6(^5D)4s4p(^3P^o)$ | $3d^6(^5D)4s(^6D)4d$    | [2]       |
| 901 | 450.968         | 55               | 450.97339             | Fe I  | $3d^7(^4F)4p$          | $3d^64s(^6D)5d$         | [2]       |
| 902 | 451.141         | 74               | 451.1417              | Fe II | $3d^6(^5D)5p$          | $3d^6(^5D)7s$           | [1]       |
| 903 | 451.417         | 40               | 451.41836             | Fe I  | $3d^7(^2G)4s$          | $3d^7(^4P)4p$           | [2]       |
| 904 | 452.269         | 105              | 452.26278             | Fe II | $3d^6(^3F2)4s$         | $3d^6(^5D)4p$           | [1]       |
| 905 | 452.51          | 209              | 452.51365             | Fe I  | $3d^6(^5D)4s4p(^3P^o)$ | $3d^6(^5D)4s(^6D)4d$    | [2]       |
| 906 | 452.764         | 65               | 452.77824             | Fe I  | $3d^7(^2D2)4s$         | $3d^7(^4P)4p$           | [2]       |
| 907 | 453.558         | 52               | 453.5692              | Fe II | $3d^5(^4G)4s4p(^3P^o)$ | $3d^6(^5D)6d$           | [1]       |
| 908 | 453.754         | 221              | 453.7673              | Fe I  | $3d^7(^2H)4s$          | $3d^7(^2G)4p$           | [2]       |

| No. | Wavelength (nm) | Intensity (a.u.) | Wavelength (nm), Ref. | Type | Lower energy level     | Higher energy level     | Reference |
|-----|-----------------|------------------|-----------------------|------|------------------------|-------------------------|-----------|
| 909 | 454.054         | 71               | 454.06719             | Fe I | $3d^64s^2$             | $3d^6(^3H)4s4p(^3P^o)$  | [2]       |
| 910 | 454.25          | 68               | 454.24118             | Fe I | $3d^64s^2$             | $3d^7(^2D2)4p$          | [2]       |
| 911 | 454.792         | 139              | 454.78471             | Fe I | $3d^7(^2D2)4s$         | $3d^7(^2G)4p$           | [2]       |
| 912 | 455.265         | 57               | 455.25413             | Fe I |                        |                         | [2]       |
| 913 | 455.622         | 148              | 455.61256             | Fe I | $3d^6(^5D)4s4p(^3P^o)$ | $3d^6(^5D)4s (^6D)4d$   | [2]       |
| 914 | 455.68          | 69               | 455.69247             | Fe I | $3d^7(^2D2)4s$         | $3d^5(^6S)4s^24p$       | [2]       |
| 915 | 456.648         | 49               | 456.65142             | Fe I | $3d^7(^2D2)4s$         | $3d^7(^4P)4p$           | [2]       |
| 916 | 456.913         | 122              | 456.9055              | Fe I | $3d^7(^2H)4s$          | $3d^6(^3G)4s4p(^3P^o)$  | [2]       |
| 917 | 457.65          | 49               | 457.6517              | Fe I | $3d^64s^2$             | $3d^7(^2D2)4p$          | [2]       |
| 918 | 457.915         | 46               | 457.9066              | Fe I | $3d^7(^2D2)4s$         | $3d^6(^3G)4s4p(^3P^o)$  | [2]       |
| 919 | 458.064         | 77               | 458.05771             | Fe I | $3d^6(^5D)4s4p(^3P^o)$ | $3d^6(^5D)4s (^4D)5s$   | [2]       |
| 920 | 458.364         | 129              | 458.37205             | Fe I | $3d^7(^2P)4s$          | $3d^6(^3P2)4s4p(^3P^o)$ | [2]       |
| 921 | 459.273         | 69               | 459.26508             | Fe I | $3d^7(^4F)4s$          | $3d^7(^4F)4p$           | [2]       |
| 922 | 459.537         | 60               | 459.5358              | Fe I | $3d^7(^2H)4s$          | $3d^7(^2G)4p$           | [2]       |
| 923 | 459.618         | 53               | 459.60602             | Fe I | $3d^6(^5D)4s4p(^3P^o)$ | $3d^6(^5D)4s (^6D)4d$   | [2]       |
| 924 | 459.998         | 67               | 459.98422             | Fe I | $3d^7(^4F)4p$          | $3d^7(^4F)6s$           | [2]       |
| 925 | 460.308         | 149              | 460.29407             | Fe I | $3d^7(^4F)4s$          | $3d^7(^4F)4p$           | [2]       |
| 926 | 460.481         | 56               | 460.48512             | Fe I | $3d^64s^2$             | $3d^6(^3G)4s4p(^3P^o)$  | [2]       |
| 927 | 461.136         | 149              | 461.12786             | Fe I | $3d^6(^5D)4s4p(^3P^o)$ | $3d^6(^5D)4s (^6D)4d$   | [2]       |
| 928 | 461.929         | 389              | 461.92877             | Fe I | $3d^6(^5D)4s4p(^3P^o)$ | $3d^6(^5D)4s (^6D)4d$   | [2]       |
| 929 | 462.515         | 127              | 462.5045              | Fe I | $3d^6(^5D)4s4p(^3P^o)$ | $3d^7(^4F)5s$           | [2]       |
| 930 | 462.744         | 60               | 462.75464             | Fe I | $3d^7(^2H)4s$          | $3d^6(^3G)4s4p(^3P^o)$  | [2]       |
| 931 | 463.02          | 54               | 463.012               | Fe I | $3d^64s^2$             | $3d^6(^5D)4s4p(^1P^o)$  | [2]       |
| 932 | 463.548         | 56               | 463.5617              | Fe I | $3d^6(^5D)4s4p(^3P^o)$ | $3d^6(^5D)4s (^6D)5s$   | [2]       |
| 933 | 463.812         | 114              | 463.801               | Fe I | $3d^6(^5D)4s4p(^3P^o)$ | $3d^6(^5D)4s (^6D)4d$   | [2]       |
| 934 | 464.34          | 79               | 464.34631             | Fe I | $3d^6(^5D)4s4p(^3P^o)$ | $3d^6(^5D)4s (^6D)4d$   | [2]       |
| 935 | 464.753         | 293              | 464.74339             | Fe I | $3d^64s^2$             | $3d^6(^3H)4s4p(^3P^o)$  | [2]       |
| 936 | 464.994         | 78               | 464.98162             | Fe I | $3d^7(^2H)4s$          | $3d^6(^3G)4s4p(^3P^o)$  | [2]       |
| 937 | 465.338         | 58               | 465.349               | Fe I | $3d^7(^4F)4s$          | $3d^6(^5D)4s4p(^3P^o)$  | [2]       |
| 938 | 465.476         | 166              | 465.46283             | Fe I | $3d^6(^5D)4s4p(^3P^o)$ | $3d^7(^4F)5s$           | [2]       |
| 939 | 465.648         | 216              | 465.6457              | Fe I | $3d^7(^4F)4p$          | $3d^64s(^6D)5d$         | [2]       |
| 940 | 465.763         | 58               | 465.75845             | Fe I | $3d^7(^4P)4s$          | $3d^6(^3P2)4s4p(^3P^o)$ | [2]       |
| 941 | 465.832         | 55               | 465.82944             | Fe I | $3d^7(^2H)4s$          | $3d^6(^3F2)4s4p(^3P^o)$ | [2]       |
| 942 | 466.118         | 83               | 466.1319              | Fe I | $3d^7(^4P)4s$          | $3d^6(^3F2)4s4p(^3P^o)$ | [2]       |
| 943 | 466.6           | 66               | 466.6111              | Fe I | $3d^7(^4F)4p$          | $3d^64s(^6D)5d$         | [2]       |

| No. | Wavelength (nm) | Intensity (a.u.) | Wavelength (nm), Ref. | Type  | Lower energy level     | Higher energy level     | Reference |
|-----|-----------------|------------------|-----------------------|-------|------------------------|-------------------------|-----------|
| 944 | 466.749         | 303              | 466.74528             | Fe I  | $3d^6(^5D)4s4p(^3P^o)$ | $3d^6(^5D)4s(^6D)4d$    | [2]       |
| 945 | 466.932         | 77               | 466.91708             | Fe I  | $3d^6(^5D)4s4p(^3P^o)$ | $3d^6(^5D)4s(^6D)4d$    | [2]       |
| 946 | 467.287         | 94               | 467.283               | Fe I  | $3d^7(^4F)4s$          | $3d^6(^5D)4s4p(^3P^o)$  | [2]       |
| 947 | 467.333         | 79               | 467.32697             | Fe I  | $3d^6(^5D)4s4p(^3P^o)$ | $3d^6(^5D)4s(^6D)4d$    | [2]       |
| 948 | 467.517         | 233              | 467.5096              | Fe I  | $3d^7(^4F)4p$          | $3d^64s(^6D)6s$         | [2]       |
| 949 | 467.746         | 72               | 467.7589              | Fe I  | $3d^7(^4F)4p$          | $3d^7(^4F)4d$           | [2]       |
| 950 | 467.895         | 357              | 467.88455             | Fe I  | $3d^6(^5D)4s4p(^3P^o)$ | $3d^6(^5D)4s(^6D)4d$    | [2]       |
| 951 | 468.341         | 74               | 468.35594             | Fe I  | $3d^7(^4P)4s$          | $3d^6(^3P2)4s4p(^3P^o)$ | [2]       |
| 952 | 468.765         | 71               | 468.7671              | Fe I  | $3d^7(^4P)4s$          | $3d^6(^3F2)4s4p(^3P^o)$ | [2]       |
| 953 | 469.154         | 152              | 469.14114             | Fe I  | $3d^64s^2$             | $3d^6(^3H)4s4p(^3P^o)$  | [2]       |
| 954 | 469.624         | 69               | 469.6366              | Fe II | $3d^6(^5D)4d$          | $3d^5(^4F)4s4p(^3P^o)$  | [1]       |
| 955 | 470.024         | 103              | 470.0158              | Fe I  | $3d^7(^4F)4p$          | $3d^7(^4F)6s$           | [2]       |
| 956 | 470.253         | 146              | 470.2601              | Fe I  | $3d^7(^4F)4p$          | $3d^7(^4F)6s$           | [2]       |
| 957 | 470.448         | 838              | 470.44038             | Fe II | $3d^6(^3F1)4p$         | $3d^6(^5D)6d$           | [1]       |
| 958 | 470.505         | 118              | 470.49478             | Fe I  | $3d^6(^5D)4s4p(^3P^o)$ | $3d^6(^5D)4s(^6D)4d$    | [2]       |
| 959 | 471.02          | 283              | 471.0283              | Fe I  | $3d^64s^2$             | $3d^6(^3H)4s4p(^3P^o)$  | [2]       |
| 960 | 471.214         | 102              | 471.21053             | Fe I  | $3d^7(^2P)4s$          | $3d^6(^3P2)4s4p(^3P^o)$ | [2]       |
| 961 | 471.443         | 81               | 471.4359              | Fe I  | $3d^6(^5D)4s4p(^1P^o)$ | $3d^64s(^4D)4d$         | [2]       |
| 962 | 472.106         | 72               | 472.10003             | Fe I  | $3d^64s^2$             | $3d^6(^3H)4s4p(^3P^o)$  | [2]       |
| 963 | 472.529         | 61               | 472.5307              | Fe II | $3d^6(^3F2)4p$         | $3d^6(^5D)4d$           | [1]       |
| 964 | 472.597         | 85               | 472.5934              | Fe I  | $3d^64s^2$             | $3d^6(^1G2)4s4p(^3P^o)$ | [2]       |
| 965 | 472.62          | 75               | 472.61367             | Fe I  | $3d^6(^5D)4s4p(^3P^o)$ | $3d^6(^5D)4s(^6D)5s$    | [2]       |
| 966 | 472.746         | 114              | 472.73943             | Fe I  | $3d^6(^5D)4s4p(^3P^o)$ | $3d^6(^5D)4s(^6D)4d$    | [2]       |
| 967 | 472.826         | 53               | 472.8164              | Fe I  | $3d^8$                 | $3d^7(^4F)5p$           | [2]       |
| 968 | 472.86          | 108              | 472.85454             | Fe I  | $3d^6(^5D)4s4p(^3P^o)$ | $3d^6(^5D)4s(^6D)4d$    | [2]       |
| 969 | 473.146         | 103              | 473.1439              | Fe II | $3d^54s^2$             | $3d^6(^5D)4p$           | [5]       |
| 970 | 473.363         | 67               | 473.35913             | Fe I  | $3d^7(^4F)4s$          | $3d^7(^4F)4p$           | [2]       |
| 971 | 473.397         | 82               | 473.40977             | Fe I  | $3d^64s^2$             | $3d^7(^2D2)4p$          | [2]       |
| 972 | 473.591         | 72               | 473.58436             | Fe I  | $3d^8$                 | $3d^6(^3G)4s4p(^3P^o)$  | [2]       |
| 973 | 473.683         | 397              | 473.67731             | Fe I  | $3d^6(^5D)4s4p(^3P^o)$ | $3d^7(^4F)5s$           | [2]       |
| 974 | 474.296         | 54               | 474.2938              | Fe I  | $3d^7(^4F)4p$          | $3d^7(^4F)4d$           | [2]       |
| 975 | 474.582         | 76               | 474.57998             | Fe I  | $3d^6(^5D)4s4p(^3P^o)$ | $3d^6(^5D)4s(^6D)4d$    | [2]       |
| 976 | 475.121         | 50               | 475.1084              | Fe I  | $3d^8$                 | $3d^7(^4F)5p$           | [2]       |
| 977 | 475.418         | 84               | 475.4039              | Fe I  | $3d^7(^4F)4p$          | $3d^7(^4F)5d$           | [2]       |
| 978 | 475.625         | 73               | 475.61226             | Fe II | $3d^6(^1F)4p$          | $3d^6(^3F2)4d$          | [1]       |

| No.  | Wavelength (nm) | Intensity (a.u.) | Wavelength (nm), Ref. | Type  | Lower energy level     | Higher energy level     | Reference |
|------|-----------------|------------------|-----------------------|-------|------------------------|-------------------------|-----------|
| 979  | 476.85          | 75               | 476.83962             | Fe I  | $3d^6(^5D)4s4p(^3P^o)$ | $3d^6(^5D)4s(^6D)5s$    | [2]       |
| 980  | 477.296         | 53               | 477.283               | Fe I  | $3d^7(^2P)4s$          | $3d^6(^3P2)4s4p(^3P^o)$ | [2]       |
| 981  | 477.387         | 46               | 477.3972              | Fe I  | $3d^8$                 | $3d^7(^4F)5p$           | [2]       |
| 982  | 477.936         | 87               | 477.94391             | Fe I  | $3d^7(^2P)4s$          | $3d^7(^4P)4p$           | [2]       |
| 983  | 478.6           | 65               | 478.59562             | Fe I  | $3d^8$                 | $3d^6(^3D)4s4p(^3P^o)$  | [2]       |
| 984  | 478.691         | 101              | 478.68067             | Fe I  | $3d^7(^2P)4s$          | $3d^6(^3P2)4s4p(^3P^o)$ | [2]       |
| 985  | 478.977         | 189              | 478.96505             | Fe I  | $3d^7(^2D2)4s$         | $3d^6(^3F2)4s4p(^3P^o)$ | [2]       |
| 986  | 479.697         | 67               | 479.7038              | Fe I  | $3d^7(^4F)4p$          | $3d^64s(^6D)5d$         | [2]       |
| 987  | 480.771         | 54               | 480.77084             | Fe I  | $3d^6(^5D)4s4p(^3P^o)$ | $3d^7(^4F)5s$           | [2]       |
| 988  | 481.114         | 57               | 481.1028              | Fe I  | $3d^7(^2P)4s$          | $3d^6(^3P2)4s4p(^3P^o)$ | [2]       |
| 989  | 481.776         | 77               | 481.77778             | Fe I  | $3d^7(^4P)4s$          | $3d^7(^4F)4p$           | [2]       |
| 990  | 481.89          | 68               | 481.9026              | Fe II | $3d^6(^3H)4p$          | $3d^54s^2$              | [1]       |
| 991  | 482.666         | 67               | 482.66825             | Fe II | $3d^6(^5D)4d$          | $3d^6(^5D_2)4f$         | [1]       |
| 992  | 482.906         | 59               | 482.91081             | Fe II | $3d^6(^5D)4d$          | $3d^6(^5D_2)4f$         | [1]       |
| 993  | 483.282         | 60               | 483.27273             | Fe I  | $3d^64s^2$             | $3d^7(^2P)4p$           | [2]       |
| 994  | 483.453         | 60               | 483.45065             | Fe I  | $3d^64s^2$             | $3d^6(^5D)4s4p(^1P^o)$  | [2]       |
| 995  | 483.784         | 219              | 483.788               | Fe I  | $3d^7(^4F)4p$          | $3d^64s(^6D)5d$         | [2]       |
| 996  | 483.955         | 76               | 483.95442             | Fe I  | $3d^7(^2H)4s$          | $3d^6(^3H)4s4p(^3P^o)$  | [2]       |
| 997  | 484.092         | 60               | 484.0896              | Fe I  | $3d^7(^4F)4p$          | $3d^7(^4F)4d$           | [2]       |
| 998  | 484.411         | 267              | 484.40135             | Fe I  | $3d^7(^2D2)4s$         | $3d^7(^2G)4p$           | [2]       |
| 999  | 484.57          | 53               | 484.56478             | Fe I  | $3d^64s^2$             | $3d^7(^2P)4p$           | [2]       |
| 1000 | 485.573         | 65               | 485.56729             | Fe I  | $3d^6(^5D)4s4p(^3P^o)$ | $3d^7(^4F)5s$           | [2]       |
| 1001 | 485.972         | 578              | 485.97411             | Fe I  | $3d^6(^5D)4s4p(^3P^o)$ | $3d^6(^5D)4s(^6D)5s$    | [2]       |
| 1002 | 486.063         | 103              | 486.06798             | Fe II | $3d^6(^5D)4d$          | $3d^6(^5D_3)4f$         | [1]       |
| 1003 | 486.359         | 92               | 486.36434             | Fe I  | $3d^6(^5D)4s4p(^3P^o)$ | $3d^7(^4F)5s$           | [2]       |
| 1004 | 486.951         | 72               | 486.94636             | Fe I  | $3d^7(^2D2)4s$         | $3d^6(^3F2)4s4p(^3P^o)$ | [2]       |
| 1005 | 487.133         | 2347             | 487.13179             | Fe I  | $3d^6(^5D)4s4p(^3P^o)$ | $3d^6(^5D)4s(^6D)5s$    | [2]       |
| 1006 | 487.213         | 929              | 487.21375             | Fe I  | $3d^6(^5D)4s4p(^3P^o)$ | $3d^6(^5D)4s(^6D)5s$    | [2]       |
| 1007 | 487.828         | 317              | 487.82108             | Fe I  | $3d^6(^5D)4s4p(^3P^o)$ | $3d^6(^5D)4s(^6D)5s$    | [2]       |
| 1008 | 488.078         | 76               | 488.08709             | Fe II | $3d^6(^3H)4p$          | $3d^54s^2$              | [1]       |
| 1009 | 488.18          | 112              | 488.17175             | Fe I  | $3d^7(^2H)4s$          | $3d^6(^3H)4s4p(^3P^o)$  | [2]       |
| 1010 | 488.215         | 80               | 488.21431             | Fe I  | $3d^6(^5D)4s4p(^3P^o)$ | $3d^7(^4F)5s$           | [2]       |
| 1011 | 488.544         | 114              | 488.54303             | Fe I  | $3d^6(^5D)4s4p(^3P^o)$ | $3d^6(^5D)4s(^4D)5s$    | [2]       |
| 1012 | 488.635         | 87               | 488.63315             | Fe I  | $3d^7(^4F)4p$          | $3d^7(^4F)4d$           | [2]       |
| 1013 | 488.749         | 79               | 488.7365              | Fe I  | $3d^8$                 | $3d^7(^4F)5p$           | [2]       |

| No.  | Wavelength (nm) | Intensity (a.u.) | Wavelength (nm), Ref. | Type  | Lower energy level     | Higher energy level      | Reference |
|------|-----------------|------------------|-----------------------|-------|------------------------|--------------------------|-----------|
| 1014 | 488.863         | 78               | 488.86366             | Fe I  | $3d^7(^4F)4p$          | $3d^7(^4F)4d$            | [2]       |
| 1015 | 489.079         | 1933             | 489.07548             | Fe I  | $3d^6(^5D)4s4p(^3P^o)$ | $3d^6(^5D)4s(^6D)5s$     | [2]       |
| 1016 | 489.147         | 5475             | 489.14921             | Fe I  | $3d^6(^5D)4s4p(^3P^o)$ | $3d^6(^5D)4s(^6D)5s$     | [2]       |
| 1017 | 490.329         | 348              | 490.33099             | Fe I  | $3d^6(^5D)4s4p(^3P^o)$ | $3d^6(^5D)4s(^6D)5s$     | [2]       |
| 1018 | 490.773         | 76               | 490.77315             | Fe I  | $3d^6(^5D)4s4p(^3P^o)$ | $3d^7(^4F)5s$            | [2]       |
| 1019 | 490.943         | 74               | 490.93831             | Fe I  | $3d^6(^5D)4s4p(^3P^o)$ | $3d^6(^5D)4s(^4D)5s$     | [2]       |
| 1020 | 491             | 95               | 491.00166             | Fe I  | $3d^6(^5D)4s4p(^3P^o)$ | $3d^7(^4F)5s$            | [2]       |
| 1021 | 491.034         | 91               | 491.03255             | Fe I  | $3d^7(^4F)4p$          | $3d^7(^4F)4d$            | [2]       |
| 1022 | 491.057         | 80               | 491.05645             | Fe I  | $3d^7(^4F)4p$          | $3d^7(^4F)4d$            | [2]       |
| 1023 | 491.715         | 67               | 491.72297             | Fe I  | $3d^7(^4F)4p$          | $3d^7(^4F)4d$            | [2]       |
| 1024 | 492.056         | 12262            | 492.05028             | Fe I  | $3d^6(^5D)4s4p(^3P^o)$ | $3d^6(^5D)4s(^6D)5s$     | [2]       |
| 1025 | 492.397         | 69               | 492.39216             | Fe II | $3d^54s^2$             | $3d^6(^5D)4p$            | [1]       |
| 1026 | 492.476         | 81               | 492.47692             | Fe I  | $3d^64s^2$             | $3d^7(^4F)4p$            | [2]       |
| 1027 | 492.521         | 60               | 492.52831             | Fe I  | $3d^7(^4F)4p$          | $3d^7(^4F)4d$            | [2]       |
| 1028 | 493.815         | 107              | 493.81735             | Fe I  | $3d^6(^5D)4s4p(^3P^o)$ | $3d^6(^5D)4s(^4D)5s$     | [2]       |
| 1029 | 493.883         | 286              | 493.88135             | Fe I  | $3d^6(^5D)4s4p(^3P^o)$ | $3d^6(^5D)4s(^6D)5s$     | [2]       |
| 1030 | 493.974         | 120              | 493.96864             | Fe I  | $3d^7(^4F)4s$          | $3d^6(^5D)4s4p(^3P^o)$   | [2]       |
| 1031 | 494.212         | 61               | 494.2169              | Fe II | $3d^6(^5D)4d$          | $3d^6(^5D_3)4f$          | [1]       |
| 1032 | 494.496         | 93               | 494.5062              | Fe II | $3d^6(^5D)4d$          | $3d^6(^5D_2)4f$          | [1]       |
| 1033 | 494.643         | 147              | 494.63878             | Fe I  | $3d^6(^5D)4s4p(^3P^o)$ | $3d^7(^4F)5s$            | [2]       |
| 1034 | 494.881         | 60               | 494.87913             | Fe II | $3d^6(^5D)4d$          | $3d^6(^5D_2)4f$          | [1]       |
| 1035 | 496.604         | 200              | 496.60886             | Fe I  | $3d^6(^5D)4s4p(^3P^o)$ | $3d^7(^4F)5s$            | [2]       |
| 1036 | 496.778         | 83               | 496.7897              | Fe I  | $3d^7(^4F)4p$          | $3d^7(^4F)4d$            | [2]       |
| 1037 | 496.847         | 48               | 496.83923             | Fe I  | $3d^7(^4F)4p$          | $3d^7(^4F)4d$            | [2]       |
| 1038 | 496.871         | 46               | 496.86975             | Fe I  | $3d^64s^2$             | $3d^6(^3F_2)4s4p(^3P^o)$ | [2]       |
| 1039 | 496.986         | 59               | 496.99173             | Fe I  | $3d^7(^4F)4p$          | $3d^7(^4F)4d$            | [2]       |
| 1040 | 497.149         | 57               | 497.13403             | Fe II | $3d^6(^5D)4d$          | $3d^6(^5D_3)4f$          | [1]       |
| 1041 | 497.311         | 101              | 497.31016             | Fe I  | $3d^6(^5D)4s4p(^3P^o)$ | $3d^6(^5D)4s(^4D)5s$     | [2]       |
| 1042 | 497.542         | 52               | 497.54118             | Fe I  | $3d^7(^2H)4s$          | $3d^7(^4P)4p$            | [2]       |
| 1043 | 497.959         | 39               | 497.95857             | Fe I  | $3d^64s^2$             | $3d^7(^2G)4p$            | [2]       |
| 1044 | 498.248         | 376              | 498.24996             | Fe I  | $3d^7(^4F)4p$          | $3d^7(^4F)4d$            | [2]       |
| 1045 | 498.387         | 261              | 498.38526             | Fe I  | $3d^7(^4F)4p$          | $3d^7(^4F)4d$            | [2]       |
| 1046 | 498.526         | 207              | 498.52526             | Fe I  | $3d^6(^5D)4s4p(^3P^o)$ | $3d^6(^5D)4s(^4D)5s$     | [2]       |
| 1047 | 498.549         | 114              | 498.55469             | Fe I  | $3d^6(^5D)4s4p(^3P^o)$ | $3d^6(^5D)4s(^6D)5s$     | [2]       |
| 1048 | 498.676         | 43               | 498.6903              | Fe I  | $3d^7(^4F)4p$          | $3d^7(^4F)4d$            | [2]       |

| No.  | Wavelength (nm) | Intensity (a.u.) | Wavelength (nm), Ref. | Type  | Lower energy level     | Higher energy level      | Reference |
|------|-----------------|------------------|-----------------------|-------|------------------------|--------------------------|-----------|
| 1049 | 498.885         | 93               | 498.89498             | Fe I  | $3d^7(^4F)4p$          | $3d^7(^4F)4d$            | [2]       |
| 1050 | 499.047         | 53               | 499.05062             | Fe II | $3d^6(^5D)4d$          | $3d^6(^5D_3)4f$          | [1]       |
| 1051 | 499.128         | 84               | 499.1268              | Fe I  | $3d^7(^4F)4p$          | $3d^7(^4F)4d$            | [2]       |
| 1052 | 499.405         | 147              | 499.41292             | Fe I  | $3d^7(^4F)4s$          | $3d^6(^5D)4s4p(^3P^o)$   | [2]       |
| 1053 | 500.145         | 145              | 500.15574             | Fe II | $3d^6(^5D)4d$          | $3d^6(^5D_2)4f$          | [1]       |
| 1054 | 500.284         | 59               | 500.27924             | Fe I  | $3d^6(^5D)4s4p(^3P^o)$ | $3d^7(^4F)5s$            | [2]       |
| 1055 | 500.48          | 97               | 500.47708             | Fe II | $3d^6(^5D)4d$          | $3d^6(^5D_2)4f$          | [1]       |
| 1056 | 500.573         | 571              | 500.5712              | Fe I  | $3d^6(^5D)4s4p(^3P^o)$ | $3d^6(^5D)4s(^4D)5s$     | [2]       |
| 1057 | 500.608         | 1565             | 500.61188             | Fe I  | $3d^6(^5D)4s4p(^3P^o)$ | $3d^6(^5D)4s(^6D)5s$     | [2]       |
| 1058 | 500.688         | 51               | 500.68402             | Fe II | $3d^6(^5D)4d$          | $3d^6(^5D_2)4f$          | [1]       |
| 1059 | 500.723         | 175              | 500.7275              | Fe I  | $3d^7(^4F)4p$          | $3d^7(^4F)4d$            | [2]       |
| 1060 | 501.104         | 45               | 501.10261             | Fe II | $3d^6(^5D)4d$          | $3d^6(^5D_2)4f$          | [1]       |
| 1061 | 501.497         | 370              | 501.49421             | Fe I  | $3d^6(^5D)4s4p(^3P^o)$ | $3d^6(^5D)4s(^4D)5s$     | [2]       |
| 1062 | 501.647         | 83               | 501.64787             | Fe I  | $3d^7(^4F)4p$          | $3d^7(^4F)4d$            | [2]       |
| 1063 | 501.832         | 55               | 501.84354             | Fe II | $3d^54s^2$             | $3d^6(^5D)4p$            | [1]       |
| 1064 | 502.225         | 195              | 502.22352             | Fe I  | $3d^6(^5D)4s4p(^3P^o)$ | $3d^6(^5D)4s(^4D)5s$     | [2]       |
| 1065 | 502.779         | 51               | 502.77563             | Fe I  | $3d^6(^5D)4s4p(^3P^o)$ | $3d^7(^4F)4d$            | [2]       |
| 1066 | 502.814         | 92               | 502.8126              | Fe I  | $3d^7(^2H)4s$          | $3d^6(^3H)4s4p(^3P^o)$   | [2]       |
| 1067 | 502.952         | 57               | 502.96173             | Fe I  | $3d^7(^2P)4s$          | $3d^6(^3P_2)4s4p(^3P^o)$ | [2]       |
| 1068 | 503.275         | 117              | 503.27035             | Fe II | $3d^6(^5D)4d$          | $3d^6(^5D_2)4f$          | [1]       |
| 1069 | 503.921         | 59               | 503.92516             | Fe I  | $3d^6(^5D)4s4p(^3P^o)$ | $3d^7(^4F)5s$            | [2]       |
| 1070 | 504.106         | 184              | 504.10713             | Fe I  | $3d^7(^4F)4s$          | $3d^6(^5D)4s4p(^3P^o)$   | [2]       |
| 1071 | 504.417         | 73               | 504.42111             | Fe I  | $3d^6(^5D)4s4p(^3P^o)$ | $3d^6(^5D)4s(^6D)5s$     | [2]       |
| 1072 | 504.763         | 46               | 504.76319             | Fe II | $3d^6(^5D)4d$          | $3d^6(^5D_4)4f$          | [1]       |
| 1073 | 504.982         | 280              | 504.98194             | Fe I  | $3d^64s^2$             | $3d^7(^4F)4p$            | [2]       |
| 1074 | 505.167         | 341              | 505.16342             | Fe I  | $3d^7(^4F)4s$          | $3d^6(^5D)4s4p(^3P^o)$   | [2]       |
| 1075 | 505.294         | 52               | 505.29811             | Fe I  | $3d^7(^2H)4s$          | $3d^6(^3H)4s4p(^3P^o)$   | [2]       |
| 1076 | 506.169         | 47               | 506.17101             | Fe II | $3d^6(^5D)4d$          | $3d^6(^5D_4)4f$          | [1]       |
| 1077 | 506.285         | 47               | 506.29274             | Fe II | $3d^6(^5D)4d$          | $3d^6(^5D_4)4f$          | [1]       |
| 1078 | 506.457         | 68               | 506.459               | Fe I  | $3d^8$                 | $3d^7(^2H)4p$            | [2]       |
| 1079 | 506.711         | 65               | 506.71492             | Fe I  | $3d^7(^4F)4p$          | $3d^7(^4F)4d$            | [2]       |
| 1080 | 506.872         | 276              | 506.87655             | Fe I  | $3d^6(^5D)4s4p(^3P^o)$ | $3d^6(^5D)4s(^6D)5s$     | [2]       |
| 1081 | 507.206         | 90               | 507.2078              | Fe I  | $3d^7(^4F)4p$          | $3d^7(^4F)4d$            | [2]       |
| 1082 | 507.413         | 381              | 507.4051              | Fe II | $3d^6(^3F_1)4s$        | $3d^6(^3D)4p$            | [1]       |

| No.  | Wavelength (nm) | Intensity (a.u.) | Wavelength (nm), Ref. | Type  | Lower energy level           | Higher energy level          | Reference |
|------|-----------------|------------------|-----------------------|-------|------------------------------|------------------------------|-----------|
| 1083 | 507.471         | 272              | 507.4748              | Fe I  | $3d^7(^4F)4p$                | $3d^7(^4F)4d$                | [2]       |
| 1084 | 507.574         | 65               | 507.57599             | Fe II | $3d^6(^5D)4d$                | $3d^6(^5D_0)4f$              | [1]       |
| 1085 | 507.655         | 75               | 507.65976             | Fe II | $3d^6(^5D)4d$                | $3d^6(^5D_3)4f$              | [1]       |
| 1086 | 507.897         | 138              | 507.89745             | Fe I  | $3d^7(^4F)4p$                | $3d^7(^4F)4d$                | [2]       |
| 1087 | 507.977         | 115              | 507.97396             | Fe I  | $3d^7(^4F)4s$                | $3d^6(^5D)4s4p(^3P^{\circ})$ | [2]       |
| 1088 | 508.334         | 239              | 508.33382             | Fe I  | $3d^7(^4F)4s$                | $3d^6(^5D)4s4p(^3P^{\circ})$ | [2]       |
| 1089 | 508.829         | 68               | 508.81528             | Fe I  | $3d^7(^4F)4p$                | $3d^7(^4F)4d$                | [2]       |
| 1090 | 509.726         | 60               | 509.72737             | Fe II | $3d^6(^5D)4d$                | $3d^6(^5D_3)4f$              | [1]       |
| 1091 | 509.898         | 81               | 509.9077              | Fe I  | $3d^6(^5D)4s4p(^3P^{\circ})$ | $3d^6(^5D)4s(^4D)5s$         | [2]       |
| 1092 | 510.955         | 69               | 510.96517             | Fe I  | $3d^7(^4F)4p$                | $3d^7(^4F)4d$                | [2]       |
| 1093 | 511.576         | 53               | 511.57778             | Fe I  | $3d^7(^2H)4s$                | $3d^6(^3G)4s4p(^3P^{\circ})$ | [2]       |
| 1094 | 511.645         | 5252             | 511.6402              | Fe II | $3d^6(^5D)4d$                | $3d^6(^5D)6p$                | [1]       |
| 1095 | 511.702         | 130              | 511.70311             | Fe II | $3d^6(^5D)4d$                | $3d^6(^5D_2)4f$              | [1]       |
| 1096 | 512.161         | 69               | 512.16388             | Fe I  | $3d^7(^4F)4p$                | $3d^7(^4F)4d$                | [2]       |
| 1097 | 512.368         | 127              | 512.37196             | Fe I  | $3d^7(^4F)4s$                | $3d^6(^5D)4s4p(^3P^{\circ})$ | [2]       |
| 1098 | 512.506         | 204              | 512.51168             | Fe I  | $3d^7(^4F)4p$                | $3d^7(^4F)4d$                | [2]       |
| 1099 | 512.885         | 54               | 512.8753              | Fe II | $3d^6(^5D)4d$                | $3d^6(^5D_4)4f$              | [1]       |
| 1100 | 513.068         | 63               | 513.0611              | Fe II | $3d^5(^4P)4s4p(^3P^{\circ})$ | $3d^6(^3G)4d$                | [1]       |
| 1101 | 513.367         | 700              | 513.36882             | Fe I  | $3d^7(^4F)4p$                | $3d^7(^4F)4d$                | [2]       |
| 1102 | 513.665         | 67               | 513.6788              | Fe II | $3d^6(^3F_2)4s$              | $3d^6(^5D)4p$                | [5]       |
| 1103 | 513.734         | 185              | 513.73818             | Fe I  | $3d^7(^4F)4p$                | $3d^7(^4F)4d$                | [2]       |
| 1104 | 514.284         | 156              | 514.29282             | Fe I  | $3d^7(^4F)4s$                | $3d^6(^5D)4s4p(^3P^{\circ})$ | [2]       |
| 1105 | 514.823         | 141              | 514.82288             | Fe I  | $3d^7(^4F)4p$                | $3d^7(^4F)4d$                | [2]       |
| 1106 | 514.938         | 121              | 514.94624             | Fe II | $3d^6(^5D)4d$                | $3d^6(^5D_2)4f$              | [1]       |
| 1107 | 516.063         | 50               | 516.0776              | Fe II | $3d^6(^5D)4d$                | $3d^6(^5D_2)4f$              | [1]       |
| 1108 | 516.235         | 451              | 516.22725             | Fe I  | $3d^7(^4F)4p$                | $3d^7(^4F)4d$                | [2]       |
| 1109 | 516.351         | 48               | 516.35724             | Fe II | $3d^6(^3H)4d$                | $3d^6(^3H_5)4f$              | [1]       |
| 1110 | 516.466         | 105              | 516.45503             | Fe I  | $3d^7(^4F)4p$                | $3d^7(^4F)4d$                | [2]       |
| 1111 | 516.546         | 77               | 516.54103             | Fe I  | $3d^7(^4F)4p$                | $3d^7(^4F)4d$                | [2]       |
| 1112 | 516.581         | 68               | 516.57343             | Fe II | $3d^6(^3P_2)4d$              | $3d^6(^3P_2)4f$              | [1]       |
| 1113 | 516.754         | 65527            | 516.74881             | Fe I  | $3d^7(^4F)4s$                | $3d^6(^5D)4s4p(^3P^{\circ})$ | [2]       |
| 1114 | 517.018         | 45               | 517.01048             | Fe II | $3d^6(^3F_2)4d$              | $3d^6(^3F_2_4)4f$            | [1]       |
| 1115 | 517.318         | 47               | 517.31249             | Fe I  | $3d^64s^2$                   | $3d^6(^3H)4s4p(^3P^{\circ})$ | [2]       |
| 1116 | 518.79          | 49               | 518.79138             | Fe I  | $3d^8$                       | $3d^7(^2D_2)4p$              | [2]       |



| No.  | Wavelength (nm) | Intensity (a.u.) | Wavelength (nm), Ref. | Type  | Lower energy level      | Higher energy level       | Reference |
|------|-----------------|------------------|-----------------------|-------|-------------------------|---------------------------|-----------|
| 1117 | 518.951         | 60               | 518.9362              | Fe II | $3d^{6(1)}5s$           | $3d^{6(3G_4)}4f$          | [1]       |
| 1118 | 519.146         | 773              | 519.14546             | Fe I  | $3d^{6(5D)}4s4p(^3P^o)$ | $3d^{6(5D)}4s(^6D)5s$     | [2]       |
| 1119 | 519.238         | 1555             | 519.23439             | Fe I  | $3d^{6(5D)}4s4p(^3P^o)$ | $3d^{6(5D)}4s(^6D)5s$     | [2]       |
| 1120 | 519.871         | 59               | 519.87108             | Fe I  | $3d^{7(4P)}4s$          | $3d^{6(5D)}4s4p(^1P^o)$   | [2]       |
| 1121 | 520.388         | 995              | 520.39086             | Fe II | $3d^{5(4G)}4s4p(^3P^o)$ | $3d^{6(5D)}5d$            | [1]       |
| 1122 | 520.457         | 398              | 520.45823             | Fe I  | $3d^6 4s^2$             | $3d^{6(5D)}4s4p(^3P^o)$   | [2]       |
| 1123 | 520.606         | 93               | 520.60372             | Fe II | $3d^5 4s^2$             | $3d^{6(3P_1)}4p$          | [1]       |
| 1124 | 520.858         | 356              | 520.85936             | Fe I  | $3d^{6(5D)}4s4p(^3P^o)$ | $3d^{6(5D)}4s(^6D)5s$     | [2]       |
| 1125 | 520.996         | 50               | 520.98843             | Fe I  | $3d^{7(2H)}4s$          | $3d^{6(3H)}4s4p(^3P^o)$   | [2]       |
| 1126 | 521.433         | 86               | 521.434               | Fe II | $3d^{6(5D)}4d$          | $3d^{6(5D_1)}4f$          | [1]       |
| 1127 | 521.628         | 3133             | 521.62737             | Fe I  | $3d^{7(4F)}4s$          | $3d^{6(5D)}4s4p(^3P^o)$   | [2]       |
| 1128 | 521.743         | 227              | 521.7389              | Fe I  | $3d^{6(5D)}4s4p(^3P^o)$ | $3d^{6(5D)}4s(^6D)5s$     | [2]       |
| 1129 | 522.236         | 1346             | 522.23518             | Fe II | $3d^{6(5D)}4d$          | $3d^{6(5D_1)}4f$          | [1]       |
| 1130 | 522.557         | 140              | 522.55257             | Fe I  | $3d^6 4s^2$             | $3d^{6(5D)}4s4p(^3P^o)$   | [2]       |
| 1131 | 523.612         | 54               | 523.62038             | Fe I  | $3d^8$                  | $3d^{7(2D_2)}4p$          | [2]       |
| 1132 | 523.796         | 52               | 523.7949              | Fe II | $3d^{6(5D)}4d$          | $3d^{6(5D_3)}4f$          | [1]       |
| 1133 | 524.151         | 130              | 524.1454              | Fe II | $3d^{6(3H)}4d$          | $3d^{6(3H_5)}4f$          | [1]       |
| 1134 | 524.254         | 130              | 524.24907             | Fe I  | $3d^6 4s^2$             | $3d^{7(2G)}4p$            | [2]       |
| 1135 | 524.701         | 107              | 524.70501             | Fe I  | $3d^6 4s^2$             | $3d^{6(5D)}4s4p(^3P^o)$   | [2]       |
| 1136 | 524.793         | 82               | 524.79553             | Fe II | $3d^{6(5D)}4d$          | $3d^{6(5D_1)}4f$          | [1]       |
| 1137 | 525.022         | 89               | 525.02086             | Fe I  | $3d^6 4s^2$             | $3d^{6(5D)}4s4p(^3P^o)$   | [2]       |
| 1138 | 525.068         | 99               | 525.06456             | Fe I  | $3d^{7(4P)}4s$          | $3d^{6(5D)}4s4p(^1P^o)$   | [2]       |
| 1139 | 525.194         | 61               | 525.19655             | Fe I  | $3d^{7(2H)}4s$          | $3d^{6(3G)}4s4p(^3P^o)$   | [2]       |
| 1140 | 525.377         | 106              | 525.36484             | Fe II | $3d^{6(5D)}4d$          | $3d^{6(5D_3)}4f$          | [1]       |
| 1141 | 525.755         | 95               | 525.76549             | Fe I  | $3d^{7(2H)}4s$          | $3d^{6(3F_2)}4s4p(^3P^o)$ | [2]       |
| 1142 | 526.03          | 206              | 526.02544             | Fe II | $3d^{6(5D)}4d$          | $3d^{6(5D_4)}4f$          | [1]       |
| 1143 | 526.133         | 207              | 526.14557             | Fe II | $3d^{6(5D)}4d$          | $3d^{6(5D_2)}4f$          | [1]       |
| 1144 | 526.327         | 315              | 526.33059             | Fe I  | $3d^{6(5D)}4s4p(^3P^o)$ | $3d^{6(5D)}4s(^6D)5s$     | [2]       |
| 1145 | 526.43          | 70               | 526.41791             | Fe II | $3d^{6(5D)}4d$          | $3d^{6(5D_2)}4f$          | [1]       |
| 1146 | 526.533         | 65               | 526.52436             | Fe I  | $3d^6 4s^2$             | $3d^{6(3H)}4s4p(^3P^o)$   | [2]       |
| 1147 | 526.659         | 2104             | 526.6555              | Fe I  | $3d^{6(5D)}4s4p(^3P^o)$ | $3d^{6(5D)}4s(^6D)5s$     | [2]       |
| 1148 | 526.728         | 53               | 526.727               | Fe I  | $3d^{7(4F)}4p$          | $3d^{7(4F)}4d$            | [2]       |
| 1149 | 526.9           | 249              | 526.906               | Fe I  | $3d^{6(5D)}4s4p(^1P^o)$ | $3d^6 4s(^4D)4d$          | [2]       |
| 1150 | 526.957         | 65527            | 526.9537              | Fe I  | $3d^{7(4F)}4s$          | $3d^{6(5D)}4s4p(^3P^o)$   | [2]       |

| No.  | Wavelength (nm) | Intensity (a.u.) | Wavelength (nm), Ref. | Type  | Lower energy level     | Higher energy level    | Reference |
|------|-----------------|------------------|-----------------------|-------|------------------------|------------------------|-----------|
| 1151 | 527.037         | 42744            | 527.0356              | Fe I  | $3d^7(^4F)4s$          | $3d^6(^5D)4s4p(^3P^o)$ | [2]       |
| 1152 | 527.22          | 61               | 527.22212             | Fe II | $3d^6(^5D)4d$          | $3d^6(^5D_4)4f$        | [1]       |
| 1153 | 527.312         | 179              | 527.31632             | Fe I  | $3d^6(^5D)4s4p(^3P^o)$ | $3d^6(^5D)4s(^6D)5s$   | [2]       |
| 1154 | 527.495         | 49               | 527.4981              | Fe I  | $3d^8$                 | $3d^7(^2H)4p$          | [2]       |
| 1155 | 528.181         | 465              | 528.179               | Fe I  | $3d^6(^5D)4s4p(^3P^o)$ | $3d^6(^5D)4s(^6D)5s$   | [2]       |
| 1156 | 528.364         | 1588             | 528.36207             | Fe I  | $3d^6(^5D)4s4p(^3P^o)$ | $3d^6(^5D)4s(^6D)5s$   | [2]       |
| 1157 | 528.855         | 112              | 528.85243             | Fe I  | $3d^64s^2$             | $3d^6(^3H)4s4p(^3P^o)$ | [2]       |
| 1158 | 529.004         | 56               | 529.00882             | Fe II | $3d^6(^3F_2)4d$        | $3d^6(^3F_2_3)4f$      | [1]       |
| 1159 | 529.164         | 65               | 529.16609             | Fe II | $3d^6(^5D)4d$          | $3d^6(^5D_3)4f$        | [1]       |
| 1160 | 529.632         | 123              | 529.6421              | Fe II | $3d^6(^1I)5s$          | $3d^6(^3G_5)4f$        | [1]       |
| 1161 | 530.226         | 464              | 530.2299              | Fe I  | $3d^6(^5D)4s4p(^3P^o)$ | $3d^6(^5D)4s(^6D)5s$   | [4]       |
| 1162 | 530.477         | 645              | 530.4761              | Fe I  | $3d^6(^5D)4s4p(^1P^o)$ |                        | [2]       |
| 1163 | 530.74          | 222              | 530.73607             | Fe I  | $3d^7(^4F)4s$          | $3d^6(^5D)4s4p(^3P^o)$ | [2]       |
| 1164 | 531.504         | 143              | 531.50804             | Fe II | $3d^6(^5D)4d$          | $3d^6(^5D_1)4f$        | [1]       |
| 1165 | 531.596         | 205              | 531.59904             | Fe II | $3d^6(^5D)4d$          | $3d^6(^5D_2)4f$        | [1]       |
| 1166 | 531.619         | 68               | 531.62139             | Fe II | $3d^6(^5D)4d$          | $3d^6(^5D_4)4f$        | [1]       |
| 1167 | 531.676         | 71               | 531.6777              | Fe II | $3d^6(^3G)4s$          | $3d^6(^5D)4p$          | [5]       |
| 1168 | 532.189         | 58               | 532.18342             | Fe I  | $3d^64s^2$             | $3d^6(^3H)4s4p(^3P^o)$ | [2]       |
| 1169 | 532.417         | 6815             | 532.41787             | Fe I  | $3d^6(^5D)4s4p(^3P^o)$ | $3d^6(^5D)4s(^6D)5s$   | [2]       |
| 1170 | 532.611         | 107              | 532.61424             | Fe I  | $3d^7(^2H)4s$          | $3d^6(^3G)4s4p(^3P^o)$ | [2]       |
| 1171 | 532.805         | 55277            | 532.80383             | Fe I  | $3d^7(^4F)4s$          | $3d^6(^5D)4s4p(^3P^o)$ | [2]       |
| 1172 | 532.85          | 11702            | 532.85313             | Fe I  | $3d^7(^4F)4s$          | $3d^6(^5D)4s4p(^3P^o)$ | [2]       |
| 1173 | 532.999         | 94               | 532.99887             | Fe I  | $3d^8$                 | $3d^6(^3H)4s4p(^3P^o)$ | [2]       |
| 1174 | 533.261         | 97               | 533.26598             | Fe I  | $3d^8$                 | $3d^7(^2P)4p$          | [2]       |
| 1175 | 533.295         | 396              | 533.28994             | Fe I  | $3d^7(^4F)4s$          | $3d^6(^5D)4s4p(^3P^o)$ | [2]       |
| 1176 | 533.99          | 779              | 533.9929              | Fe I  | $3d^6(^5D)4s4p(^3P^o)$ | $3d^6(^5D)4s(^6D)5s$   | [2]       |
| 1177 | 534.104         | 32834            | 534.10237             | Fe I  | $3d^7(^4F)4s$          | $3d^6(^5D)4s4p(^3P^o)$ | [2]       |
| 1178 | 534.571         | 63               | 534.5738              | Fe II | $3d^6(^5D)4d$          | $3d^6(^5D_4)4f$        | [1]       |
| 1179 | 535.539         | 127              | 535.54209             | Fe II | $3d^6(^5D)4d$          | $3d^6(^5D_3)4f$        | [1]       |
| 1180 | 535.88          | 66               | 535.88719             | Fe II | $3d^6(^5D)4d$          | $3d^6(^5D_3)4f$        | [1]       |
| 1181 | 536.04          | 81               | 536.04795             | Fe II | $3d^6(^5D)4d$          | $3d^6(^5D_2)4f$        | [1]       |
| 1182 | 536.301         | 84               | 536.29698             | Fe II | $3d^6(^5D)4d$          | $3d^6(^5D_3)4f$        | [1]       |
| 1183 | 536.483         | 309              | 536.48709             | Fe I  | $3d^7(^4F)4p$          | $3d^7(^4F)4d$          | [2]       |
| 1184 | 536.54          | 198              | 536.53987             | Fe I  | $3d^7(^2H)4s$          | $3d^7(^2G)4p$          | [2]       |

| No.  | Wavelength (nm) | Intensity (a.u.) | Wavelength (nm), Ref. | Type  | Lower energy level     | Higher energy level      | Reference |
|------|-----------------|------------------|-----------------------|-------|------------------------|--------------------------|-----------|
| 1185 | 536.608         | 66               | 536.62087             | Fe II | $3d^6(^5D)4d$          | $3d^6(^5D_3)4f$          | [1]       |
| 1186 | 536.745         | 597              | 536.7466              | Fe I  | $3d^7(^4F)4p$          | $3d^7(^4F)4d$            | [2]       |
| 1187 | 536.995         | 1046             | 536.99615             | Fe I  | $3d^7(^4F)4p$          | $3d^7(^4F)4d$            | [2]       |
| 1188 | 537.145         | 11889            | 537.14893             | Fe I  | $3d^7(^4F)4s$          | $3d^6(^5D)4s4p(^3P^o)$   | [2]       |
| 1189 | 537.374         | 60               | 537.37082             | Fe I  | $3d^7(^4F)4p$          | $3d^7(^4F)4d$            | [2]       |
| 1190 | 537.625         | 80               | 537.61358             | Fe II | $3d^6(^3H)4d$          | $3d^6(^3H_6)4f$          | [1]       |
| 1191 | 537.934         | 54               | 537.9251              | Fe II | $3d^6(^5D)4d$          | $3d^6(^5D_4)4f$          | [1]       |
| 1192 | 537.969         | 107              | 537.95737             | Fe I  | $3d^64s^2$             | $3d^7(^2G)4p$            | [2]       |
| 1193 | 538.335         | 1035             | 538.33688             | Fe I  | $3d^7(^4F)4p$          | $3d^7(^4F)4d$            | [2]       |
| 1194 | 538.712         | 60               | 538.70633             | Fe II | $3d^6(^5D)4d$          | $3d^6(^5D_3)4f$          | [1]       |
| 1195 | 538.918         | 54               | 538.90321             | Fe II | $3d^6(^5D)4d$          | $3d^6(^5D_0)4f$          | [1]       |
| 1196 | 538.952         | 179              | 538.94788             | Fe I  | $3d^7(^4F)4p$          | $3d^7(^4F)4d$            | [2]       |
| 1197 | 539.318         | 692              | 539.31673             | Fe I  | $3d^6(^5D)4s4p(^3P^o)$ | $3d^6(^5D)4s(^6D)5s$     | [2]       |
| 1198 | 539.581         | 65               | 539.58546             | Fe II | $3d^6(^5D)4d$          | $3d^6(^5D_0)4f$          | [1]       |
| 1199 | 539.764         | 45               | 539.76175             | Fe I  | $3d^64s^2$             | $3d^6(^3F_2)4s4p(^3P^o)$ | [2]       |
| 1200 | 539.832         | 67               | 539.82791             | Fe I  | $3d^7(^4F)4p$          | $3d^7(^4F)4d$            | [2]       |
| 1201 | 540.301         | 52               | 540.28926             | Fe II | $3d^6(^5D)4d$          | $3d^6(^5D_2)4f$          | [1]       |
| 1202 | 541.089         | 432              | 541.09095             | Fe I  | $3d^7(^4F)4p$          | $3d^7(^4F)4d$            | [2]       |
| 1203 | 541.523         | 1128             | 541.51989             | Fe I  | $3d^7(^4F)4p$          | $3d^7(^4F)4d$            | [2]       |
| 1204 | 542.413         | 1108             | 542.40678             | Fe I  | $3d^7(^4F)4p$          | $3d^7(^4F)4d$            | [2]       |
| 1205 | 542.527         | 82               | 542.5269              | Fe II | $3d^6(^3G)4s$          | $3d^6(^5D)4p$            | [5][9]    |
| 1206 | 543.451         | 2353             | 543.45235             | Fe I  | $3d^7(^4F)4s$          | $3d^6(^5D)4s4p(^3P^o)$   | [2]       |
| 1207 | 543.644         | 74               | 543.62954             | Fe I  | $3d^7(^4F)4p$          | $3d^7(^4F)4d$            | [2]       |
| 1208 | 544.134         | 66               | 544.13383             | Fe I  | $3d^7(^4F)4p$          | $3d^7(^4F)4d$            | [2]       |
| 1209 | 544.328         | 65               | 544.3227              | Fe II | $3d^6(^3P_1)4s$        | $3d^6(^3D)4p$            | [1]       |
| 1210 | 544.351         | 56               | 544.34443             | Fe II | $3d^6(^5D)4d$          | $3d^6(^5D_4)4f$          | [1]       |
| 1211 | 544.499         | 200              | 544.50421             | Fe I  | $3d^7(^4F)4p$          | $3d^7(^4F)4d$            | [2]       |
| 1212 | 545.217         | 105              | 545.20879             | Fe I  | $3d^64s^2$             | $3d^6(^3G)4s4p(^3P^o)$   | [2]       |
| 1213 | 545.729         | 79               | 545.7421              | Fe II | $3d^6(^3F_1)4s$        | $3d^6(^3D)4p$            | [1]       |
| 1214 | 546.298         | 138              | 546.29591             | Fe I  | $3d^7(^4F)4p$          | $3d^7(^4F)4d$            | [2]       |
| 1215 | 546.321         | 137              | 546.32759             | Fe I  | $3d^7(^4F)4p$          | $3d^7(^4F)4d$            | [2]       |
| 1216 | 546.423         | 57               | 546.42792             | Fe I  | $3d^8$                 | $3d^7(^2P)4p$            | [2]       |
| 1217 | 546.594         | 66               | 546.59322             | Fe II | $3d^6(^5D)4d$          | $3d^6(^5D_1)4f$          | [1]       |
| 1218 | 546.639         | 88               | 546.63958             | Fe I  | $3d^7(^4F)4p$          | $3d^7(^4F)4d$            | [2]       |

| No.  | Wavelength (nm) | Intensity (a.u.) | Wavelength (nm), Ref. | Type  | Lower energy level     | Higher energy level      | Reference |
|------|-----------------|------------------|-----------------------|-------|------------------------|--------------------------|-----------|
| 1219 | 547.265         | 61               | 547.27087             | Fe I  | $3d^6(^5D)4s4p(^3P^o)$ | $3d^6(^5D)4s(^4D)5s$     | [2]       |
| 1220 | 547.322         | 64               | 547.3164              | Fe I  | $3d^7(^4F)4p$          | $3d^6(^5D)4s(^6D)4d$     | [2]       |
| 1221 | 547.39          | 122              | 547.39001             | Fe I  | $3d^7(^4F)4p$          | $3d^6(^5D)4s(^4D)5s$     | [2]       |
| 1222 | 547.527         | 59               | 547.51828             | Fe II | $3d^6(^5D)4d$          | $3d^6(^5D_1)4f$          | [1]       |
| 1223 | 547.652         | 265              | 547.65639             | Fe I  | $3d^7(^4F)4p$          | $3d^6(^5D)4s(^4D)5s$     | [2]       |
| 1224 | 548.504         | 93               | 548.5057              | Fe II | $3d^6(^3P_1)4p$        | $3d^6(^3F_2)4d$          | [1]       |
| 1225 | 548.777         | 91               | 548.77457             | Fe I  | $3d^7(^4F)4p$          | $3d^7(^4F)4d$            | [2]       |
| 1226 | 548.879         | 57               | 548.87748             | Fe II | $3d^6(^5D)4d$          | $3d^6(^5D_2)4f$          | [1]       |
| 1227 | 549.277         | 54               | 549.2676              | Fe II | $3d^6(^5D)4d$          | $3d^6(^5D_3)4f$          | [1]       |
| 1228 | 549.379         | 78               | 549.38306             | Fe II | $3d^6(^5D)4d$          | $3d^6(^5D_4)4f$          | [1]       |
| 1229 | 549.754         | 261              | 549.75157             | Fe I  | $3d^7(^4F)4s$          | $3d^6(^5D)4s4p(^3P^o)$   | [2]       |
| 1230 | 550.14          | 175              | 550.14649             | Fe I  | $3d^7(^4F)4s$          | $3d^6(^5D)4s4p(^3P^o)$   | [2]       |
| 1231 | 550.389         | 105              | 550.38934             | Fe II | $3d^6(^5D)4d$          | $3d^6(^5D_4)4f$          | [1]       |
| 1232 | 550.594         | 84               | 550.58813             | Fe I  | $3d^7(^4F)4p$          | $3d^7(^4F)4d$            | [2]       |
| 1233 | 550.616         | 101              | 550.61985             | Fe II | $3d^6(^5D)4d$          | $3d^6(^5D_4)4f$          | [1]       |
| 1234 | 551.762         | 71               | 551.7557              | Fe II | $3d^6(^5D)5p$          | $3d^6(^3D)5s$            | [1]       |
| 1235 | 552.556         | 83               | 552.55439             | Fe I  | $3d^7(^4F)4p$          | $3d^6(^5D)4s(^4D)5s$     | [2]       |
| 1236 | 553.462         | 60               | 553.46631             | Fe I  | $3d^64s^2$             | $3d^6(^3P_2)4s4p(^3P^o)$ | [2]       |
| 1237 | 553.553         | 105              | 553.54175             | Fe I  | $3d^8$                 | $3d^7(^2H)4p$            | [2]       |
| 1238 | 554.323         | 69               | 554.31892             | Fe I  | $3d^6(^5D)4s4p(^1P^o)$ | $3d^64s(^4D)4d$          | [2]       |
| 1239 | 554.391         | 70               | 554.39353             | Fe I  | $3d^7(^4F)4p$          | $3d^6(^5D)4s(^4D)5s$     | [2]       |
| 1240 | 554.9           | 75               | 554.90005             | Fe II | $3d^6(^5D)4d$          | $3d^6(^5D_4)4f$          | [1]       |
| 1241 | 555.488         | 97               | 555.48947             | Fe I  | $3d^7(^4F)4p$          | $3d^7(^4F)4d$            | [2]       |
| 1242 | 555.929         | 56               | 555.9262              | Fe II | $3d^6(^5D)4p$          | $3d^64s^2$               | [1]       |
| 1243 | 556.28          | 1314             | 556.27061             | Fe I  | $3d^7(^4F)4p$          | $3d^7(^4F)4d$            | [2]       |
| 1244 | 556.563         | 82               | 556.57036             | Fe I  | $3d^7(^4F)4p$          | $3d^7(^4F)4d$            | [2]       |
| 1245 | 556.721         | 69               | 556.7278              | Fe I  | $3d^7(^4F)4p$          | $3d^7(^4F)4d$            | [2]       |
| 1246 | 556.958         | 458              | 556.96177             | Fe I  | $3d^6(^5D)4s4p(^3P^o)$ | $3d^6(^5D)4s(^6D)5s$     | [2]       |
| 1247 | 557.286         | 1031             | 557.2842              | Fe I  | $3d^6(^5D)4s4p(^3P^o)$ | $3d^6(^5D)4s(^6D)5s$     | [2]       |
| 1248 | 557.602         | 187              | 557.60884             | Fe I  | $3d^6(^5D)4s4p(^3P^o)$ | $3d^6(^5D)4s(^6D)5s$     | [2]       |
| 1249 | 557.986         | 49               | 557.99258             | Fe II | $3d^6(^5D)4d$          | $3d^6(^5D_2)4f$          | [1]       |
| 1250 | 558.395         | 93               | 558.39446             | Fe II | $3d^6(^5D)4d$          | $3d^6(^5D_4)4f$          | [1]       |
| 1251 | 558.668         | 2402             | 558.67555             | Fe I  | $3d^6(^5D)4s4p(^3P^o)$ | $3d^6(^5D)4s(^6D)5s$     | [2]       |
| 1252 | 558.759         | 83               | 558.75736             | Fe I  | $3d^8$                 | $3d^7(^2D_2)4p$          | [2]       |

| No.  | Wavelength (nm) | Intensity (a.u.) | Wavelength (nm), Ref. | Type  | Lower energy level     | Higher energy level      | Reference |
|------|-----------------|------------------|-----------------------|-------|------------------------|--------------------------|-----------|
| 1253 | 558.918         | 85               | 558.9253              | Fe II | $3d^5(^4P)4s4p(^3P^o)$ | $3d^54s(^7S)4d$          | [1]       |
| 1254 | 560.293         | 228              | 560.29447             | Fe I  | $3d^6(^5D)4s4p(^3P^o)$ | $3d^6(^5D)4s(^6D)5s$     | [2]       |
| 1255 | 560.906         | 85               | 560.8972              | Fe I  | $3d^6(^5D)4s4p(^3P^o)$ | $3d^6(^5D)4s(^4D)5s$     | [2]       |
| 1256 | 561.564         | 6942             | 561.56435             | Fe I  | $3d^6(^5D)4s4p(^3P^o)$ | $3d^6(^5D)4s(^6D)5s$     | [2]       |
| 1257 | 561.825         | 65               | 561.81721             | Fe II | $3d^6(^5D)4d$          | $3d^5(^2D_3)4s4p(^3P^o)$ | [1]       |
| 1258 | 562.29          | 78               | 562.2946              | Fe I  | $3d^64s^2$             | $3d^7(^4P)4p$            | [2]       |
| 1259 | 562.449         | 332              | 562.45418             | Fe I  | $3d^6(^5D)4s4p(^3P^o)$ | $3d^6(^5D)4s(^6D)5s$     | [2]       |
| 1260 | 562.767         | 70               | 562.7716              | Fe I  | $3d^64s^2$             | $3d^7(^4P)4p$            | [2]       |
| 1261 | 563.39          | 145              | 563.39461             | Fe I  | $3d^6(^5D)4s4p(^1P^o)$ | $3d^6(^5D)4s(^4D)4d$     | [2]       |
| 1262 | 563.821         | 119              | 563.82618             | Fe I  | $3d^7(^4F)4p$          | $3d^6(^5D)4s(^4D)5s$     | [2]       |
| 1263 | 564.41          | 77               | 564.40255             | Fe I  | $3d^6(^5D)4s4p(^1P^o)$ | $3d^64s(^6D)6s$          | [2]       |
| 1264 | 564.976         | 59               | 564.96303             | Fe I  | $3d^64s^2$             | $3d^6(^3H)4s4p(^3P^o)$   | [2]       |
| 1265 | 565.519         | 68               | 565.51761             | Fe I  | $3d^6(^5D)4s4p(^1P^o)$ | $3d^6(^5D)4s(^4D)4d$     | [2]       |
| 1266 | 565.881         | 319              | 565.8816              | Fe I  | $3d^6(^5D)4s4p(^3P^o)$ | $3d^6(^5D)4s(^6D)5s$     | [2]       |
| 1267 | 566.006         | 56               | 566.01407             | Fe II | $3d^6(^5D)4d$          | $3d^6(^5D_3)4f$          | [1]       |
| 1268 | 566.141         | 856              | 566.13451             | Fe I  | $3d^6(^5D)4s4p(^3P^o)$ | $3d^6(^5D)4s(^4D)5s$     | [2]       |
| 1269 | 566.254         | 1775             | 566.25158             | Fe I  | $3d^7(^4F)4p$          | $3d^6(^5D)4s(^4D)5s$     | [2]       |
| 1270 | 567.916         | 48               | 567.90226             | Fe I  | $3d^7(^4F)4p$          | $3d^7(^4F)4d$            | [2]       |
| 1271 | 568.244         | 52               | 568.2498              | Fe I  | $3d^6(^5D)4s4p(^1P^o)$ | $3d^7(^4F)6s$            | [2]       |
| 1272 | 568.605         | 82               | 568.612               | Fe I  | $3d^64s^2$             | $3d^6(^3P_2)4s4p(^3P^o)$ | [2]       |
| 1273 | 568.65          | 63               | 568.65298             | Fe I  | $3d^7(^4F)4p$          | $3d^7(^4F)4d$            | [2]       |
| 1274 | 569.158         | 65               | 569.14967             | Fe I  | $3d^7(^4F)4p$          | $3d^6(^5D)4s(^4D)5s$     | [2]       |
| 1275 | 569.362         | 54               | 569.36421             | Fe I  |                        |                          | [2]       |
| 1276 | 569.61          | 61               | 569.60892             | Fe I  | $3d^7(^4F)4p$          | $3d^7(^4F)4d$            | [2]       |
| 1277 | 570.163         | 62               | 570.15442             | Fe I  | $3d^64s^2$             | $3d^7(^4F)4p$            | [2]       |
| 1278 | 570.298         | 60               | 570.2906              | Fe I  | $3d^6(^5D)4s4p(^1P^o)$ | $3d^64s(^6D)5d$          | [2]       |
| 1279 | 570.591         | 72               | 570.59918             | Fe I  | $3d^7(^4F)4p$          | $3d^7(^4F)4d$            | [2]       |
| 1280 | 570.941         | 167              | 570.93779             | Fe I  | $3d^6(^5D)4s4p(^3P^o)$ | $3d^6(^5D)4s(^6D)5s$     | [2]       |
| 1281 | 571.178         | 56               | 571.18483             | Fe I  | $3d^7(^4F)4p$          | $3d^6(^5D)4s(^4D)5s$     | [2]       |
| 1282 | 571.211         | 64               | 571.21312             | Fe I  | $3d^6(^5D)4s4p(^3P^o)$ | $3d^6(^5D)4s(^6D)5s$     | [2]       |
| 1283 | 571.29          | 58               | 571.2888              | Fe I  | $3d^6(^5D)4s4p(^1P^o)$ | $3d^64s(^6D)5d$          | [2]       |
| 1284 | 571.448         | 184              | 571.45487             | Fe I  | $3d^6(^5D)4s4p(^1P^o)$ | $3d^64s(^4D)4d$          | [2]       |
| 1285 | 571.775         | 81               | 571.78325             | Fe I  | $3d^6(^5D)4s4p(^3P^o)$ | $3d^6(^5D)4s(^4D)5s$     | [2]       |
| 1286 | 572.946         | 66               | 572.96026             | Fe II | $3d^6(^3F_2)4p$        | $3d^54s^2$               | [1]       |
| 1287 | 573.093         | 65               | 573.0857              | Fe I  | $3d^6(^5D)4s4p(^1P^o)$ | $3d^64s(^6D)5d$          | [2]       |

| No.  | Wavelength (nm) | Intensity (a.u.) | Wavelength (nm), Ref. | Type  | Lower energy level     | Higher energy level    | Reference |
|------|-----------------|------------------|-----------------------|-------|------------------------|------------------------|-----------|
| 1288 | 573.172         | 86               | 573.17619             | Fe I  | $3d^7(^4F)4p$          | $3d^6(^5D)4s(^4D)5s$   | [2]       |
| 1289 | 573.453         | 73               | 573.45648             | Fe I  | $3d^6(^5D)4s4p(^1P^o)$ | $3d^64s(^6D)5d$        | [2]       |
| 1290 | 573.757         | 60               | 573.7534              | Fe II | $3d^6(^5D)4d$          | $3d^6(^5D_4)4f$        | [1]       |
| 1291 | 573.779         | 61               | 573.78923             | Fe II | $3d^6(^5D)4d$          | $3d^6(^5D_0)4f$        | [1]       |
| 1292 | 575.197         | 120              | 575.20316             | Fe I  | $3d^7(^4F)4p$          | $3d^7(^4F)4d$          | [2]       |
| 1293 | 575.309         | 111              | 575.31223             | Fe I  | $3d^6(^5D)4s4p(^3P^o)$ | $3d^6(^5D)4s(^4D)5s$   | [2]       |
| 1294 | 575.781         | 69               | 575.7718              | Fe II | $3d^6(^3F)4d$          | $3d^6(^3H_4)4f$        | [1]       |
| 1295 | 575.95          | 65               | 575.95408             | Fe I  | $3d^7(^4F)4p$          | $3d^6(^5D)4s(^4D)5s$   | [2]       |
| 1296 | 576.096         | 97               | 576.1082              | Fe I  | $3d^7(^4F)4p$          | $3d^6(^5D)4s(^6D)4d$   | [2]       |
| 1297 | 576.219         | 63               | 576.22311             | Fe I  | $3d^6(^5D)4s4p(^1P^o)$ | $3d^7(^4F)6s$          | [2]       |
| 1298 | 576.86          | 104              | 576.84503             | Fe II | $3d^5(^4G)4s4p(^3P^o)$ | $3d^6(^5D)5d$          | [1]       |
| 1299 | 576.938         | 71               | 576.93225             | Fe I  | $3d^7(^4F)4p$          | $3d^7(^4F)4d$          | [2]       |
| 1300 | 577.511         | 66               | 577.50802             | Fe I  | $3d^7(^4F)4p$          | $3d^6(^5D)4s(^4D)5s$   | [2]       |
| 1301 | 578.218         | 54               | 578.21093             | Fe I  | $3d^6(^5D)4s4p(^1P^o)$ | $3d^64s(^4D)4d$        | [2]       |
| 1302 | 578.408         | 66               | 578.4034              | Fe I  | $3d^7(^4F)4p$          | $3d^6(^5D)4s(^6D)4d$   | [2]       |
| 1303 | 578.442         | 57               | 578.44454             | Fe II | $3d^6(^5D)4d$          | $3d^6(^5D_1)4f$        | [1]       |
| 1304 | 578.465         | 65               | 578.4658              | Fe I  | $3d^6(^5D)4s4p(^3P^o)$ | $3d^6(^5D)4s(^6D)5s$   | [2]       |
| 1305 | 579.07          | 83               | 579.06893             | Fe II | $3d^6(^5D)4d$          | $3d^6(^5D_2)4f$        | [1]       |
| 1306 | 579.093         | 58               | 579.10176             | Fe I  | $3d^6(^5D)4s4p(^3P^o)$ | $3d^6(^5D)4s(^6D)5s$   | [2]       |
| 1307 | 579.328         | 57               | 579.3289              | Fe II | $3d^6(^1F)4s$          | $3d^5(^6S)4s4p(^3P^o)$ | [1]       |
| 1308 | 579.597         | 66               | 579.58659             | Fe II | $3d^6(^1G_1)4s$        | $3d^6(^3D)4p$          | [1]       |
| 1309 | 580.447         | 7493             | 580.44623             | Fe I  | $3d^7(^4F)4p$          | $3d^6(^5D)4s(^4D)5s$   | [2]       |
| 1310 | 581.36          | 76               | 581.36695             | Fe II | $3d^6(^1F)4s$          | $3d^6(^3P_2)4p$        | [1]       |
| 1311 | 582.553         | 54               | 582.5515              | Fe II | $3d^6(^5D)5p$          | $3d^54s(^7S)4d$        | [1]       |
| 1312 | 583.847         | 52               | 583.83714             | Fe I  | $3d^6(^5D)4s4p(^3P^o)$ | $3d^7(^4F)5s$          | [2]       |
| 1313 | 584.128         | 86               | 584.11341             | Fe I  |                        |                        | [2]       |
| 1314 | 584.196         | 73               | 584.2027              | Fe I  | $3d^7(^4F)4p$          | $3d^6(^5D)4s(^6D)4d$   | [2]       |
| 1315 | 584.241         | 94               | 584.22945             | Fe II | $3d^6(^5D)4d$          | $3d^6(^5D_2)4f$        | [1]       |
| 1316 | 584.477         | 88               | 584.49185             | Fe I  | $3d^7(^4F)4p$          | $3d^6(^5D)4s(^6D)4d$   | [2]       |
| 1317 | 585.813         | 232              | 585.8265              | Fe I  | $3d^64s^2$             | $3d^7(^4F)4p$          | [2]       |
| 1318 | 585.858         | 234              | 585.84493             | Fe II | $3d^6(^3H)4p$          | $3d^54s^2$             | [1]       |
| 1319 | 585.892         | 423              | 585.87776             | Fe I  | $3d^7(^4F)4p$          | $3d^6(^5D)4s(^6D)4d$   | [2]       |
| 1320 | 585.971         | 244              | 585.95863             | Fe I  | $3d^7(^4F)4p$          | $3d^7(^4F)4d$          | [2]       |
| 1321 | 586.195         | 106              | 586.19726             | Fe II | $3d^6(^3H)4p$          | $3d^6(^5D)5s$          | [1]       |
| 1322 | 586.24          | 194              | 586.23561             | Fe I  | $3d^7(^4F)4p$          | $3d^7(^4F)4d$          | [2]       |

| No.  | Wavelength (nm) | Intensity (a.u.) | Wavelength (nm), Ref. | Type  | Lower energy level           | Higher energy level          | Reference |
|------|-----------------|------------------|-----------------------|-------|------------------------------|------------------------------|-----------|
| 1323 | 586.442         | 81               | 586.4396              | Fe I  | $3d^6(^5D)4s4p(^1P^{\circ})$ | $3d^64s(^6D)5d$              | [2]       |
| 1324 | 587.283         | 18944            | 587.2726              | Fe I  | $3d^6(^5D)4s4p(^3P^{\circ})$ | $3d^6(^5D)4s(^6D)5s$         | [2]       |
| 1325 | 587.788         | 109              | 587.7788              | Fe I  | $3d^7(^4F)4p$                | $3d^6(^5D)4s(^6D)4d$         | [2]       |
| 1326 | 589.334         | 66               | 589.32345             | Fe I  | $3d^7(^4F)4p$                | $3d^6(^5D)4s(^6D)4d$         | [2]       |
| 1327 | 589.535         | 164              | 589.53391             | Fe II | $3d^6(^5D)4d$                | $3d^6(^5D_2)4f$              | [1]       |
| 1328 | 590.251         | 62520            | 590.24732             | Fe I  | $3d^7(^2F)4s$                | $3d^6(^3G)4s4p(^3P^{\circ})$ | [2]       |
| 1329 | 590.285         | 2355             | 590.28238             | Fe II | $3d^6(^5D)4d$                | $3d^6(^5D_3)4f$              | [1]       |
| 1330 | 590.341         | 97               | 590.3524              | Fe II | $3d^6(^5D)4d$                | $3d^6(^5D_2)4f$              | [1]       |
| 1331 | 590.565         | 77               | 590.56716             | Fe I  | $3d^7(^4F)4p$                | $3d^7(^4F)4d$                | [2]       |
| 1332 | 590.788         | 82               | 590.7863              | Fe I  | $3d^64s^2$                   | $3d^7(^4P)4p$                | [2]       |
| 1333 | 591.012         | 81               | 590.99732             | Fe I  | $3d^6(^5D)4s4p(^3P^{\circ})$ | $3d^6(^5D)4s(^6D)5s$         | [2]       |
| 1334 | 591.37          | 5296             | 591.37639             | Fe II | $3d^6(^3F_2)4p$              | $3d^6(^5D)5s$                | [1]       |
| 1335 | 591.895         | 4849             | 591.8932              | Fe I  | $3d^7(^4F)4p$                | $3d^6(^5D)4s(^6D)4d$         | [2]       |
| 1336 | 592.051         | 120              | 592.0503              | Fe I  | $3d^7(^2H)4s$                | $3d^6(^3H)4s4p(^3P^{\circ})$ | [2]       |
| 1337 | 592.353         | 57               | 592.3515              | Fe I  | $3d^5(^6S)4s^24p$            | $3d^64s(^6D)5d$              | [2]       |
| 1338 | 592.643         | 71               | 592.6357              | Fe II | $3d^5(^6S)4s4p(^3P^{\circ})$ | $3d^6(^5D)5s$                | [1]       |
| 1339 | 592.788         | 65               | 592.77887             | Fe I  | $3d^7(^4F)4p$                | $3d^7(^4F)4d$                | [2]       |
| 1340 | 593.38          | 79               | 593.38                | Fe I  | $3d^6(^5D)4s4p(^1P^{\circ})$ | $3d^7(^4F)4d$                | [2]       |
| 1341 | 593.547         | 78               | 593.5433              | Fe II | $3d^5(^4G)4s4p(^3P^{\circ})$ | $3d^6(^5D)5d$                | [1]       |
| 1342 | 593.636         | 60               | 593.63189             | Fe II | $3d^5(^4D)4s4p(^3P^{\circ})$ | $3d^6(^3G)4d$                | [1]       |
| 1343 | 593.938         | 458              | 593.924               | Fe I  | $3d^7(^2H)4s$                | $3d^6(^3H)4s4p(^3P^{\circ})$ | [2]       |
| 1344 | 595.242         | 123              | 595.25183             | Fe II | $3d^7$                       | $3d^6(^3P_2)4p$              | [1]       |
| 1345 | 595.676         | 133              | 595.6694              | Fe I  | $3d^7(^4F)4s$                | $3d^6(^5D)4s4p(^3P^{\circ})$ | [2]       |
| 1346 | 596.545         | 17617            | 596.5471              | Fe I  | $3d^7(^4F)4p$                | $3d^6(^5D)4s(^6D)4d$         | [2]       |
| 1347 | 596.712         | 84               | 596.698               | Fe I  | $3d^8$                       | $3d^7(^2G)4p$                | [2]       |
| 1348 | 598.236         | 109              | 598.2312              | Fe I  | $3d^6(^5D)4s4p(^1P^{\circ})$ | $3d^64s(^6D)5d$              | [2]       |
| 1349 | 598.369         | 115              | 598.36806             | Fe I  | $3d^7(^4F)4p$                | $3d^7(^4F)4d$                | [2]       |
| 1350 | 598.48          | 104              | 598.48147             | Fe I  | $3d^7(^4F)4p$                | $3d^7(^4F)4d$                | [2]       |
| 1351 | 598.525         | 66               | 598.5188              | Fe I  | $3d^6(^5D)4s4p(^1P^{\circ})$ | $3d^64s(^6D)5d$              | [2]       |
| 1352 | 598.691         | 83               | 598.69559             | Fe I  | $3d^7(^2H)4s$                | $3d^6(^3H)4s4p(^3P^{\circ})$ | [2]       |
| 1353 | 598.714         | 129              | 598.70645             | Fe I  | $3d^7(^4F)4p$                | $3d^7(^4F)4d$                | [2]       |
| 1354 | 598.791         | 9907             | 598.80087             | Fe II | $3d^6(^5D)4d$                | $3d^6(^5D_3)4f$              | [1]       |
| 1355 | 599.347         | 65               | 599.3387              | Fe II | $3d^6(^5D)4d$                | $3d^6(^5D_3)4f$              | [1]       |
| 1356 | 599.902         | 83               | 599.89381             | Fe I  | $3d^64s^2$                   | $3d^6(^3H)4s4p(^3P^{\circ})$ | [2]       |

## References

- [1] G. Nave and S. Johansson, The Spectrum of Fe II, *Astrophys. J., Suppl. Ser.*, 2013, **204**: 1.
- [2] G. Nave, S. Johansson, R. C. M. Learner, A. P. Thorne, and J. W. Brault, A New Multiplet Table for Fe I, *Astrophys. J., Suppl. Ser.*, 1994, **94**, 221–459.
- [3] J.C. Pickering, S. Johansson, and P. L. Smith, The FERRUM Project: Branching Ratios and Atomic Transition Probabilities of Fe II Transitions from the  $3d^6(a^3F)4p$  Subconfiguration in the Visible to VUV Spectral Region, *Astron. Astrophys.*, 2001, **377**, 361–367.
- [4] H. M. Crosswhite, The Iron-Neon Hollow-Cathode Spectrum, *J. Res. Natl. Bur. Stand. (U.S.), Sect. A*, 1975, **79**, 17–69.
- [5] J. C. Dobbie, The Spectrum of Fe II, *Ann. Solar Phys. Obs. Cambridge*, 1938, **5**, Part 1, 1–58.
- [6] A. S. King, The Spark Spectrum of Iron,  $\lambda\lambda$  5016–7712 with Identifications of Fe II Lines in the Solar Spectrum, *Astrophys. J.*, 1939, **87**, 109–117.
