# Supplementary material for: Measurement of Fe emission spectrum from 170 nm to 600 nm with a coma-free spectrometer
Source: Royal Society of Chemistry journal article supplement (doi:10.1039/d3ja00342f), 2024-01-01
Supplement: d3ja00342f2.pdf [file d3ja00342f2.pdf]

ESI 2. The measured 1095 spectral lines of the Fe atom in the 170-600 nm wavelength region, comparing to that shown in the reference with energy transitions happened between the energy levels by more and possible explanations in expectation.

| No. | Wavelength (nm) | Intensity (a.u.) | Wavelength (nm), Ref. | Type  | Lower energy level           | Higher energy level          | Reference |
|-----|-----------------|------------------|-----------------------|-------|------------------------------|------------------------------|-----------|
| 1   | 170.956         | 26               | 170.95543             | Fe II | $3d^7$                       | $3d^6(^3P2)4p$               | [1]       |
|     |                 |                  | 170.96143             | Fe II | $3d^6(^5D)4p$                | $3d^6(^3F2)4d$               | [1]       |
|     |                 |                  | 170.96852             | Fe II | $3d^7$                       | $3d^6(^3D)4p$                | [1]       |
| 2   | 171.991         | 23               | 171.9777              | Fe I  | $3d^64s^2$                   | $3d^64s(^4D)5p$              | [2]       |
|     |                 |                  | 172.00396             | Fe II | $3d^7$                       | $3d^6(^3D)4p$                | [1]       |
| 3   | 172.147         | 22               | 172.1484              | Fe I  | $3d^64s^2$                   | $3d^64s(^4D)5p$              | [2]       |
|     |                 |                  | 172.1484              | Fe II | $3d^6(^3G)4s$                | $3d^6(^5D)5p$                | [1]       |
| 4   | 175.577         | 29               | 175.585               | Fe II | $3d^6(^3H)4s$                | $3d^6(^1F)4p$                | [1]       |
|     |                 |                  | 175.5885              | Fe II | $3d^6(^3H)4p$                | $3d^6(^3H)6s$                | [1]       |
|     |                 |                  | 175.5885              | Fe II | $3d^6(^5D)4p$                | $3d^6(^5D)6s$                | [1]       |
| 5   | 176.335         | 24               | 176.3304              | Fe I  | $3d^64s^2$                   | $3d^64s(^6D)6p$              | [2]       |
|     |                 |                  | 176.3304              | Fe II | $3d^54s^2$                   | $3d^6(^3H)5p$                | [1]       |
|     |                 |                  | 176.3444              | Fe I  | $3d^64s^2$                   | $3d^64s(^6D)6p$              | [2]       |
| 6   | 176.913         | 41               | 176.91409             | Fe II | $3d^6(^1D2)4s$               | $3d^5(^4P)4s4p(^3P^{\circ})$ | [1]       |
|     |                 |                  | 176.92736             | Fe II | $3d^5(^6S)4s4p(^3P^{\circ})$ | $3d^54s(^7S)4d$              | [1]       |
| 7   | 178.537         | 42               | 178.52342             | Fe II | $3d^54s^2$                   | $3d^6(^3F1)5p$               | [1]       |
|     |                 |                  | 178.527761            | Fe II | $3d^54s^2$                   | $3d^5(^6S)4s4p(^1P^{\circ})$ | [1]       |
|     |                 |                  | 178.54758             | Fe II | $3d^54s^2$                   | $3d^6(^3F1)5p$               | [1]       |
| 8   | 179.764         | 128              | 179.7626              | Fe II | $3d^54s^2$                   | $3d^6(^3H)5p$                | [1]       |
|     |                 |                  | 179.7626              | Fe II | $3d^7$                       | $3d^5(^6S)4s4p(^3P^{\circ})$ | [1]       |
| 9   | 180.944         | 20               | 180.9291              | Fe II | $3d^6(^5D)4p$                | $3d^6(^3P2)5s$               | [1]       |
|     |                 |                  | 180.93168             | Fe II | $3d^7$                       | $3d^6(^1S2)4p$               | [1]       |
| 10  | 182.496         | 35               | 182.486               | Fe II | $3d^6(^3G)4p$                | $3d^6(^3H)6s$                | [1]       |
|     |                 |                  | 182.498               | Fe II | $3d^7$                       | $3d^6(^3D)4p$                | [1]       |
| 11  | 183.049         | 24               | 183.0401              | Fe II | $3d^54s^2$                   | $3d^5(^4G)4s4p(^1P^{\circ})$ | [1]       |
|     |                 |                  | 183.046314            | Fe II | $3d^54s^2$                   | $3d^5(^4G)4s4p(^1P^{\circ})$ | [1]       |
| 12  | 184.806         | 21               | 184.79265             | Fe I  | $3d^64s^2$                   | $3d^7(^4F)5p$                | [2]       |
|     |                 |                  | 184.8081              | Fe II | $3d^6(^5D)4s$                | $3d^6(^3F2)4p$               | [1]       |
|     |                 |                  | 184.8081              | Fe II | $3d^6(^1D2)4s$               | $3d^6(^3P1)4p$               | [1]       |
| 13  | 186.238         | 50               | 186.23256             | Fe I  | $3d^64s^2$                   | $3d^6(^3D)4s4p(^3P^{\circ})$ | [2]       |
|     |                 |                  | 186.2443              | Fe II | $3d^54s^2$                   | $3d^5(^4F)4s4p(^3P^{\circ})$ | [1]       |
| 14  | 186.527         | 38               | 186.521               | Fe II | $3d^54s^2$                   | $3d^5(^4F)4s4p(^3P^{\circ})$ | [1]       |
|     |                 |                  | 186.53091             | Fe I  | $3d^64s^2$                   | $3d^7(^4F)5p$                | [2]       |

| No. | Wavelength (nm) | Intensity (a.u.) | Wavelength (nm), Ref. | Type  | Lower energy level           | Higher energy level           | Reference |
|-----|-----------------|------------------|-----------------------|-------|------------------------------|-------------------------------|-----------|
| 15  | 187.502         | 34               | 187.4897              | Fe I  | $3d^6 4s^2$                  | $3d^7(^4F)5p$                 | [2]       |
|     |                 |                  | 187.49711             | Fe II | $3d^6(^5D)4s$                | $3d^6(^3P2)4p$                | [1]       |
|     |                 |                  | 187.51355             | Fe II | $3d^5 4s^2$                  | $3d^6(^5D)6p$                 | [1]       |
|     |                 |                  | 187.51587             | Fe I  | $3d^6 4s^2$                  | $3d^7(^4F)5p$                 | [2]       |
| 16  | 188.14          | 25               | 188.13114             | Fe I  | $3d^6 4s^2$                  | $3d^7(^4F)5p$                 | [2]       |
|     |                 |                  | 188.13797             | Fe II | $3d^5 4s^2$                  | $3d^6(^3F2)5p$                | [1]       |
| 17  | 188.356         | 32               | 188.36489             | Fe II | $3d^5 4s^2$                  | $3d^5(^2D1)4s4p(^3P^{\circ})$ | [1]       |
|     |                 |                  | 188.36797             | Fe I  | $3d^6 4s^2$                  | $3d^6(^3D)4s4p(^3P^{\circ})$  | [2]       |
| 18  | 188.404         | 37               | 188.39225             | Fe I  | $3d^6 4s^2$                  | $3d^7(^4F)5p$                 | [2]       |
|     |                 |                  | 188.41181             | Fe II | $3d^5 4s^2$                  | $3d^6(^3F2)5p$                | [1]       |
| 19  | 188.982         | 25               | 188.9807              | Fe II | $3d^6(^3H)4p$                | $3d^6(^5D)6d$                 | [1]       |
|     |                 |                  | 188.9835              | Fe II | $3d^6(^3F2)4p$               | $3d^6(^5D)6d$                 | [1]       |
|     |                 |                  | 188.98752             | Fe II | $3d^5 4s^2$                  | $3d^6(^3F2)5p$                | [1]       |
|     |                 |                  | 188.98978             | Fe I  | $3d^6 4s^2$                  | $3d^7(^4F)5p$                 | [2]       |
| 20  | 189.102         | 31               | 189.09833             | Fe II | $3d^5 4s^2$                  | $3d^6(^5D)6p$                 | [1]       |
|     |                 |                  | 189.10513             | Fe II | $3d^5 4s^2$                  | $3d^6(^5D)6p$                 | [1]       |
|     |                 |                  | 189.10865             | Fe II | $3d^5 4s^2$                  | $3d^6(^3F1)5p$                | [1]       |
| 21  | 189.295         | 32               | 189.2853              | Fe I  | $3d^6 4s^2$                  | $3d^7(^2P)4p$                 | [2]       |
|     |                 |                  | 189.29223             | Fe II | $3d^5 4s^2$                  | $3d^6(^3F2)5p$                | [1]       |
| 22  | 189.511         | 19               | 189.507               | Fe II | $3d^5 4s^2$                  | $3d^6(^5D)6p$                 | [1]       |
|     |                 |                  | 189.5202              | Fe II | $3d^5 4s^2$                  | $3d^5(^2D3)4s4p(^3P^{\circ})$ | [1]       |
| 23  | 190.546         | 18               | 190.560381            | Fe II | $3d^5 4s^2$                  | $3d^6(^5D)6p$                 | [1]       |
| 24  | 190.57          | 23               | 190.560381            | Fe II | $3d^5 4s^2$                  | $3d^6(^5D)6p$                 | [1]       |
|     |                 |                  | 190.57409             | Fe II | $3d^6(^3P1)4s$               | $3d^5(^4D)4s4p(^3P^{\circ})$  | [1]       |
| 25  | 190.991         | 28               | 190.9793              | Fe II | $3d^7$                       | $3d^5(^4P)4s4p(^3P^{\circ})$  | [1]       |
|     |                 |                  | 190.9923              | Fe II | $3d^6(^3P2)4p$               | $3d^6(^5D)6d$                 | [1]       |
| 26  | 191.076         | 50               | 191.06731             | Fe II | $3d^7$                       | $3d^6(^1G2)4p$                | [1]       |
|     |                 |                  | 191.078               | Fe II | $3d^5 4s^2$                  | $3d^6(^5D)6p$                 | [1]       |
| 27  | 194.697         | 39               | 194.6839              | Fe I  | $3d^6 4s^2$                  | $3d^7(^2D2)4p$                | [2]       |
|     |                 |                  | 194.69878             | Fe I  | $3d^6 4s^2$                  | $3d^6(^5D)4s(^6D)5p$          | [2]       |
|     |                 |                  | 194.69972             | Fe II | $3d^6(^3P1)4s$               | $3d^5(^4D)4s4p(^3P^{\circ})$  | [1]       |
| 28  | 196.275         | 22               | 196.27332             | Fe I  | $3d^6 4s^2$                  | $3d^7(^2D2)4p$                | [2]       |
|     |                 |                  | 196.28835             | Fe I  | $3d^6 4s^2$                  | $3d^6(^5D)4s(^6D)5p$          | [2]       |
| 29  | 196.708         | 66               | 196.7127              | Fe I  | $3d^7(^4F)4s$                | $3d^6 4s(^4D)5p$              | [2]       |
|     |                 |                  | 196.72087             | Fe II | $3d^5(^6S)4s4p(^3P^{\circ})$ | $3d^5(^6S)4p^2$               | [1]       |
| 30  | 199.55          | 21               | 199.5423              | Fe II | $3d^6(^3P2)4s$               | $3d^6(^3D)4p$                 | [1]       |

| No. | Wavelength (nm) | Intensity (a.u.) | Wavelength (nm), Ref. | Type  | Lower energy level     | Higher energy level     | Reference |
|-----|-----------------|------------------|-----------------------|-------|------------------------|-------------------------|-----------|
|     |                 |                  | 199.54469             | Fe II | $3d^5 4s^2$            | $3d^6(^5D)6p$           | [1]       |
|     |                 |                  | 199.55396             | Fe II | $3d^5 4s^2$            | $3d^6(^5D)6p$           | [1]       |
| 31  | 200.063         | 25               | 200.0578              | Fe I  | $3d^7(^4F)4s$          | $3d^6(^3D)4s4p(^1P^o)$  | [2]       |
|     |                 |                  | 200.0671              | Fe I  | $3d^7(^4F)4s$          | $3d^6 4s(^6D)6p$        | [2]       |
| 32  | 200.086         | 86               | 200.09046             | Fe II | $3d^5 4s^2$            | $3d^5(^2D3)4s4p(^3P^o)$ | [1]       |
|     |                 |                  | 200.09291             | Fe II | $3d^5 4s^2$            | $3d^5(^2D1)4s4p(^3P^o)$ | [1]       |
| 33  | 200.931         | 46               | 200.918               | Fe II | $3d^6(^1F)4s$          | $3d^5(^4D)4s4p(^3P^o)$  | [1]       |
|     |                 |                  | 200.9216              | Fe II | $3d^5 4s^2$            | $3d^6(^5D)6p$           | [1]       |
|     |                 |                  | 200.92881             | Fe II | $3d^5 4s^2$            | $3d^6(^5D)6p$           | [1]       |
|     |                 |                  | 200.9367              | Fe II | $3d^6(^1D2)4s$         | $3d^5(^4G)4s4p(^3P^o)$  | [1]       |
| 34  | 201.495         | 32               | 201.494               | Fe I  | $3d^7(^4F)4s$          | $3d^6 4s(^6D)6p$        | [2]       |
|     |                 |                  | 201.494               | Fe II | $3d^6(^3H)4p$          | $3d^6(^3G)4d$           | [1]       |
| 35  | 201.701         | 16               | 201.7033              | Fe II | $3d^7$                 | $3d^6(^3G)4p$           | [1]       |
|     |                 |                  | 201.7094              | Fe II | $3d^7$                 | $3d^6(^3F2)4p$          | [1]       |
|     |                 |                  | 201.7159              | Fe I  | $3d^6 4s^2$            | $3d^6(^5D)4s(^6D)5p$    | [2]       |
| 36  | 201.724         | 22               | 201.7094              | Fe II | $3d^7$                 | $3d^6(^3F2)4p$          | [1]       |
|     |                 |                  | 201.7159              | Fe I  | $3d^6 4s^2$            | $3d6(^5D)4s(^6D)5p$     | [2]       |
| 37  | 201.918         |                  | 201.9075              | Fe I  | $3d^7(^4F)4s$          | $3d^6 4s(^6D)6p$        | [2]       |
|     |                 |                  | 201.9192              | Fe II | $3d^7$                 | $3d^6(^3G)4p$           | [1]       |
| 38  | 202.18          | 24               | 202.1664              | Fe II | $3d^5 4s^2$            | $3d^6(^5D_2)4f$         | [1]       |
|     |                 |                  | 202.1664              | Fe II | $3d^5(^6S)4s4p(^3P^o)$ | $3d^6(^5D)6s$           | [1]       |
|     |                 |                  | 202.1714              | Fe I  | $3d^7(^4F)4s$          | $3d^6 4s(^6D_{5/2})4f$  | [2]       |
| 39  | 202.624         | 40               | 202.6261              | Fe I  | $3d^7(^4F)4s$          | $3d^6 4s(^6D)6p$        | [2]       |
|     |                 |                  | 202.63229             | Fe II | $3d^6(^3G)4p$          | $3d^6(^3D)4d$           | [1]       |
| 40  | 204.231         | 131              | 204.2254              | Fe II | $3d^6(^3G)4p$          | $3d^6(^5D)6d$           | [1]       |
|     |                 |                  | 204.2254              | Fe II | $3d^6(^3F2)4p$         | $3d^6(^5D)7s$           | [1]       |
| 41  | 207.829         | 37               | 207.81607             | Fe II | $3d^7$                 | $3d^6(^3F2)4p$          | [1]       |
|     |                 |                  | 207.84064             | Fe II | $3d^5 4s^2$            | $3d^5(^2F1)4s4p(^3P^o)$ | [1]       |
| 42  | 207.85          | 38               | 207.84064             | Fe II | $3d^5 4s^2$            | $3d^5(^2F1)4s4p(^3P^o)$ | [1]       |
| 43  | 210.654         | 30               | 210.63947             | Fe I  | $3d^6 4s^2$            | $3d^5(^6S)4s^2 4p$      | [2]       |
|     |                 |                  | 210.64339             | Fe II | $3d^5 4s^2$            | $3d^5(^2D3)4s4p(^3P^o)$ | [1]       |
|     |                 |                  | 210.64962             | Fe II | $3d^6(^3H)4p$          | $3d^6(^3G)4d$           | [1]       |
| 44  | 210.913         | 23               | 210.89982             | Fe II | $3d^5(^6S)4s4p(^3P^o)$ | $3d^5 4s(^7S)4d$        | [1]       |
|     |                 |                  | 210.91032             | Fe II | $3d^6(^3H)4s$          | $3d^6(^1I)4p$           | [1]       |
|     |                 |                  | 210.91032             | Fe II | $3d^6(^3H)4p$          | $3d^6(^3G)4d$           | [1]       |
| 45  | 211.026         | 19               | 211.02353             | Fe I  | $3d^7(^4F)4s$          | $3d^6(^3D)4s4p(^3P^o)$  | [2]       |

| No. | Wavelength (nm) | Intensity (a.u.) | Wavelength (nm), Ref. | Type  | Lower energy level     | Higher energy level     | Reference |
|-----|-----------------|------------------|-----------------------|-------|------------------------|-------------------------|-----------|
|     |                 |                  | 211.03095             | Fe II | $3d^7$                 | $3d^6(^3F1)4p$          | [1]       |
| 46  | 211.53          | 23               | 211.51699             | Fe I  | $3d^64s^2$             | $3d^5(^6S)4s^24p$       | [2]       |
|     |                 |                  | 211.5439              | Fe II | $3d^6(^1F)4s$          | $3d^6(^3F1)4p$          | [1]       |
| 47  | 211.643         | 36               | 211.63507             | Fe II | $3d^5(^6S)4s4p(^3P^o)$ | $3d^54s(^5S)4d$         | [1]       |
|     |                 |                  | 211.64815             | Fe II | $3d^5(^6S)4s4p(^3P^o)$ | $3d^54s(^5S)4d$         | [1]       |
| 48  | 212.286         | 95               | 212.2799              | Fe I  | $3d^64s^2$             | $3d^6(^3F2)4s4p(^3P^o)$ | [2]       |
|     |                 |                  | 212.2957              | Fe I  | $3d^7(^4F)4s$          | $3d^7(^4F)5p$           | [2]       |
| 49  | 212.428         | 37               | 212.42072             | Fe II | $3d^6(^3H)4p$          | $3d^6(^1I)5s$           | [1]       |
|     |                 |                  | 212.4389              | Fe II | $3d^54s^2$             | $3d^6(^5D)6p$           | [1]       |
| 50  | 212.63          | 30               | 212.62103             | Fe II | $3d^6(^3P2)4s$         | $3d^5(^6S)4s4p(^3P^o)$  | [1]       |
|     |                 |                  | 212.62105             | Fe I  | $3d^64s^2$             | $3d^7(^4P)4p$           | [2]       |
|     |                 |                  | 212.63764             | Fe II | $3d^54s^2$             | $3d^5(^2D3)4s4p(^3P^o)$ | [1]       |
|     |                 |                  | 212.64203             | Fe II | $3d^6(^3P2)4p$         | $3d^6(^3F2)4d$          | [1]       |
| 51  | 212.762         | 69               | 212.7474              | Fe I  | $3d^64s^2$             | $3d^6(^3G)4s4p(^3P^o)$  | [2]       |
|     |                 |                  | 212.7603              | Fe II | $3d^6(^3F2)4s$         | $3d^6(^3D)4p$           | [1]       |
|     |                 |                  | 212.7603              | Fe II | $3d^6(^3P2)4p$         | $3d^6(^3D)5s$           | [1]       |
| 52  | 213.054         | 26               | 213.04075             | Fe I  | $3d^7(^4F)4s$          | $3d^6(^3D)4s4p(^3P^o)$  | [2]       |
|     |                 |                  | 213.04404             | Fe I  | $3d^7(^4F)4s$          | $3d^7(^4F)5p$           | [2]       |
|     |                 |                  | 213.05493             | Fe II | $3d^6(^3H)4s$          | $3d^6(^1G2)4p$          | [1]       |
| 53  | 213.315         | 21               | 213.30295             | Fe II | $3d^6(^3F2)4p$         | $3d^6(^3G)4d$           | [1]       |
|     |                 |                  | 213.31848             | Fe II | $3d^6(^3F2)4p$         | $3d^6(^3G)4d$           | [1]       |
| 54  | 213.415         | 37               | 213.40093             | Fe II | $3d^6(^3G)4s$          | $3d^6(^3D)4p$           | [1]       |
|     |                 |                  | 213.4238              | Fe II | $3d^6(^3F2)4s$         | $3d^6(^3G)4p$           | [1]       |
| 55  | 214.3           | 23               | 214.2991              | Fe II | $3d^6(^5D)4s$          | $3d^6(^5D)4p$           | [1]       |
|     |                 |                  | 214.31039             | Fe II | $3d^6(^3F2)4p$         | $3d^6(^3D)5s$           | [1]       |
| 56  | 214.433         | 47               | 214.4367              | Fe II | $3d^6(^3F2)4s$         | $3d^6(^3G)4p$           | [1]       |
|     |                 |                  | 214.44485             | Fe I  | $3d^7(^4F)4s$          | $3d^7(^4F)5p$           | [2]       |
| 57  | 214.457         | 37               | 214.44485             | Fe I  | $3d^7(^4F)4s$          | $3d^7(^4F)5p$           | [2]       |
|     |                 |                  | 214.45681             | Fe I  | $3d^7(^4F)4s$          | $3d^7(^4F)5p$           | [2]       |
| 58  | 214.65          | 28               | 214.63689             | Fe II | $3d^7$                 | $3d^6(^3F2)4p$          | [1]       |
|     |                 |                  | 214.65074             | Fe II | $3d^54s^2$             | $3d^5(^2D3)4s4p(^3P^o)$ | [1]       |
|     |                 |                  | 214.6606              | Fe II | $3d^6(^3H)4s$          | $3d^6(^3G)4p$           | [1]       |
| 59  | 215.349         | 113              | 215.3438              | Fe II | $3d^6(^3F2)4p$         | $3d^6(^3D)5s$           | [1]       |
|     |                 |                  | 215.3607              | Fe II | $3d^6(^3H)4s$          | $3d^6(^3G)4p$           | [1]       |
| 60  | 215.59          | 28               | 215.58144             | Fe I  | $3d^7(^4F)4s$          | $3d^7(^4F)5p$           | [2]       |
|     |                 |                  | 215.58703             | Fe II | $3d^6(^3G)4s$          | $3d^6(^3D)4p$           | [1]       |

| No. | Wavelength (nm) | Intensity (a.u.) | Wavelength (nm), Ref. | Type  | Lower energy level | Higher energy level     | Reference |
|-----|-----------------|------------------|-----------------------|-------|--------------------|-------------------------|-----------|
| 61  | 215.782         | 33               | 215.77944             | Fe I  | $3d^6 4s^2$        | $3d^7(^4P)4p$           | [2]       |
|     |                 |                  | 215.79388             | Fe II | $3d^6(^3F2)4p$     | $3d^6(^3G)4d$           | [1]       |
|     |                 |                  | 215.79604             | Fe II | $3d^6(^3F2)4p$     | $3d^6(^3G)4d$           | [1]       |
| 62  | 216.337         | 40               | 216.33665             | Fe I  | $3d^7(^4F)4s$      | $3d^7(^4F)5p$           | [2]       |
|     |                 |                  | 216.34848             | Fe II | $3d^6(^3F2)4p$     | $3d^6(^3G)4d$           | [1]       |
| 63  | 216.53          | 39               | 216.5232              | Fe II | $3d^6(^3P2)4s$     | $3d^6(^3F2)4p$          | [1]       |
|     |                 |                  | 216.5283              | Fe II | $3d^6(^3F1)4s$     | $3d^5(^4G)4s4p(^3P^o)$  | [1]       |
| 64  | 216.59          | 48               | 216.58614             | Fe I  | $3d^7(^4F)4s$      | $3d^7(^4F)5p$           | [2]       |
|     |                 |                  | 216.59911             | Fe I  | $3d^7(^4F)4s$      | $3d^6(^3D)4s4p(^3P^o)$  | [2]       |
| 65  | 216.674         | 978              | 216.671289            | Fe II | $3d^7$             | $3d^6(^1D2)4p$          | [1]       |
|     |                 |                  | 216.67732             | Fe I  | $3d^6 4s^2$        | $3d^7(^4P)4p$           | [2]       |
| 66  | 217.132         | 26               | 217.1207              | Fe II | $3d^6(^3H)4p$      | $3d^6(^3G)4d$           | [1]       |
|     |                 |                  | 217.12338             | Fe I  | $3d^7(^4F)4s$      | $3d^6(^3H)4s4p(^1P^o)$  | [2]       |
|     |                 |                  | 217.1297              | Fe I  | $3d^6 4s^2$        | $3d^7(^4P)4p$           | [2]       |
|     |                 |                  | 217.13702             | Fe I  | $3d^7(^4F)4s$      | $3d^6(^3H)4s4p(^1P^o)$  | [2]       |
| 67  | 217.217         | 77               | 217.20423             | Fe II | $3d^6(^5D)4p$      | $3d^6(^5D)4d$           | [1]       |
|     |                 |                  | 217.21233             | Fe II | $3d^6(^3F2)4p$     | $3d^6(^3G)4d$           | [1]       |
|     |                 |                  | 217.21423             | Fe I  | $3d^6 4s^2$        | $3d^6(^3P2)4s4p(^3P^o)$ | [2]       |
|     |                 |                  | 217.2225              | Fe I  | $3d^7(^4F)4s$      | $3d^6(^3G)4s4p(^3P^o)$  | [2]       |
| 68  | 217.421         | 23               | 217.41429             | Fe I  | $3d^7(^4F)4s$      | $3d^6(^3G)4s4p(^3P^o)$  | [2]       |
|     |                 |                  | 217.41618             | Fe II | $3d^6(^3P2)4p$     | $3d^6(^3F2)4d$          | [1]       |
| 69  | 217.807         | 534              | 217.80806             | Fe I  | $3d^6 4s^2$        | $3d^7(^4P)4p$           | [2]       |
|     |                 |                  | 217.81185             | Fe I  | $3d^6 4s^2$        | $3d^6(^3P2)4s4p(^3P^o)$ | [2]       |
| 70  | 218.156         | 25               | 218.1474              | Fe II | $3d^6(^5D)4p$      | $3d^6(^5D)4d$           | [1]       |
|     |                 |                  | 218.15305             | Fe II | $3d^6(^3H)4p$      | $3d^6(^3F2)4d$          | [1]       |
|     |                 |                  | 218.1652              | Fe I  | $3d^7(^4F)4s$      | $3d^7(^2P)4p$           | [2]       |
|     |                 |                  | 218.1652              | Fe II | $3d^6(^5D)4p$      | $3d^6(^5D)4d$           | [1]       |
| 71  | 218.253         | 35               | 218.2434              | Fe II | $3d^6(^3P2)4p$     | $3d^6(^3F2)4d$          | [1]       |
|     |                 |                  | 218.24889             | Fe II | $3d^6(^3H)4p$      | $3d^6(^5D)5d$           | [1]       |
|     |                 |                  | 218.26161             | Fe II | $3d^7$             | $3d^5(^6S)4s4p(^3P^o)$  | [1]       |
| 72  | 218.397         | 86               | 218.38341             | Fe II | $3d^6(^3F2)4s$     | $3d^6(^1G2)4p$          | [1]       |
|     |                 |                  | 218.39797             | Fe I  | $3d^7(^4F)4s$      | $3d^6(^3H)4s4p(^1P^o)$  | [2]       |
|     |                 |                  | 218.39935             | Fe II | $3d^6(^3P2)4p$     | $3d^6(^3F2)4d$          | [1]       |
|     |                 |                  | 218.4027              | Fe II | $3d^5 4s^2$        | $3d^5(^4D)4s4p(^3P^o)$  | [1]       |
| 73  | 218.434         | 55               | 218.4374              | Fe II | $3d^6(^3H)4p$      | $3d^6(^3H)4d$           | [1]       |
|     |                 |                  | 218.44601             | Fe I  | $3d^7(^4F)4s$      | $3d^6(^3G)4s4p(^3P^o)$  | [2]       |

| No. | Wavelength (nm) | Intensity (a.u.) | Wavelength (nm), Ref. | Type  | Lower energy level     | Higher energy level     | Reference |
|-----|-----------------|------------------|-----------------------|-------|------------------------|-------------------------|-----------|
| 74  | 218.687         | 41               | 218.6767              | Fe I  | $3d^7(^4F)4s$          | $3d^64s(^4D)5p$         | [2]       |
|     |                 |                  | 218.6767              | Fe II | $3d^6(^3F1)4s$         | $3d^5(^4P)4s4p(^3P^o)$  | [1]       |
|     |                 |                  | 218.68427             | Fe II | $3d^7$                 | $3d^6(^3H)4p$           | [1]       |
|     |                 |                  | 218.68924             | Fe I  | $3d^64s^2$             | $3d^6(^3P2)4s4p(^3P^o)$ | [2]       |
| 75  | 218.723         | 137              | 218.7119              | Fe I  | $3d^7(^4F)4s$          | $3d^7(^4F)5p$           | [2]       |
|     |                 |                  | 218.7119              | Fe II | $3d^5(^6S)4s4p(^3P^o)$ | $3d^6(^5D)6d$           | [1]       |
|     |                 |                  | 218.71943             | Fe I  | $3d^64s^2$             | $3d^7(^4P)4p$           | [2]       |
|     |                 |                  | 218.7299              | Fe II | $3d^6(^1D2)4s$         | $3d^6(^1F)4p$           | [1]       |
|     |                 |                  | 218.73423             | Fe II | $3d^6(^3P2)4p$         | $3d^6(^5D)5d$           | [1]       |
| 76  | 220.036         | 108              | 220.02821             | Fe II | $3d^6(^3F2)4s$         | $3d^6(^1G2)4p$          | [1]       |
|     |                 |                  | 220.03519             | Fe I  | $3d^64s^2$             | $3d^7(^4P)4p$           | [2]       |
|     |                 |                  | 220.03898             | Fe I  | $3d^64s^2$             | $3d^7(^4P)4p$           | [2]       |
|     |                 |                  | 220.04914             | Fe I  | $3d^7(^4F)4s$          | $3d^7(^4F)5p$           | [2]       |
| 77  | 220.072         | 66               | 220.0577              | Fe I  | $3d^64s^2$             | $3d^6(^3H)4s4p(^3P^o)$  | [2]       |
|     |                 |                  | 220.07241             | Fe I  | $3d^64s^2$             | $3d^7(^4P)4p$           | [2]       |
|     |                 |                  | 220.08516             | Fe II | $3d^6(^3P2)4p$         | $3d^6(^3F2)4d$          | [1]       |
| 78  | 220.615         | 67               | 220.608158            | Fe II | $3d^6(^5D)4p$          | $3d^6(^5D)4d$           | [1]       |
|     |                 |                  | 220.614762            | Fe II | $3d^6(^5D)4p$          | $3d^6(^5D)4d$           | [1]       |
|     |                 |                  | 220.6221              | Fe II | $3d^7$                 | $3d^6(^3H)4p$           | [1]       |
| 79  | 220.844         | 26               | 220.840556            | Fe II | $3d^6(^5D)4p$          | $3d^6(^5D)4d$           | [1]       |
|     |                 |                  | 220.85421             | Fe II | $3d^6(^3F2)4p$         | $3d^6(^3G)4d$           | [1]       |
| 80  | 221.109         | 23               | 221.10007             | Fe II | $3d^7$                 | $3d^6(^3G)4p$           | [1]       |
|     |                 |                  | 221.1095              | Fe II | $3d^6(^3G)4s$          | $3d^6(^3D)4p$           | [1]       |
|     |                 |                  | 221.11149             | Fe II | $3d^6(^3H)4s$          | $3d^6(^3G)4p$           | [1]       |
|     |                 |                  | 221.12353             | Fe I  | $3d^64s^2$             | $3d^6(^3F2)4s4p(^3P^o)$ | [2]       |
| 81  | 222.121         | 41               | 222.116439            | Fe II | $3d^6(^3H)4s$          | $3d^6(^3G)4p$           | [1]       |
|     |                 |                  | 222.1317              | Fe I  | $3d^7(^4F)4s$          | $3d^6(^3P2)4s4p(^1P^o)$ | [2]       |
| 82  | 222.145         | 24               | 222.1317              | Fe I  | $3d^7(^4F)4s$          | $3d^6(^3P2)4s4p(^1P^o)$ | [2]       |
| 83  | 222.35          | 26               | 222.3374              | Fe II | $3d^7$                 | $3d^6(^3H)4p$           | [1]       |
|     |                 |                  | 222.348571            | Fe II | $3d^6(^3H)4s$          | $3d^6(^3G)4p$           | [1]       |
| 84  | 223.121         | 46               | 223.1101              | Fe I  | $3d^7(^4F)4s$          | $3d^6(^1G2)4s4p(^3P^o)$ | [2]       |
|     |                 |                  | 223.1213              | Fe I  | $3d^64s^2$             | $3d^6(^3P2)4s4p(^3P^o)$ | [2]       |
| 85  | 223.157         | 21               | 223.14201             | Fe II | $3d^6(^3P2)4s$         | $3d^6(^3G)4p$           | [1]       |
|     |                 |                  | 223.149255            | Fe II | $3d^6(^5D)4p$          | $3d^6(^5D)4d$           | [1]       |
|     |                 |                  | 223.1663              | Fe II | $3d^6(^3H)4s$          | $3d^6(^3G)4p$           | [1]       |
| 86  | 223.784         | 23               | 223.7817              | Fe I  | $3d^7(^4F)4s$          | $3d^6(^3D)4s4p(^3P^o)$  | [2]       |

| No. | Wavelength (nm) | Intensity (a.u.) | Wavelength (nm), Ref. | Type  | Lower energy level     | Higher energy level      | Reference |
|-----|-----------------|------------------|-----------------------|-------|------------------------|--------------------------|-----------|
|     |                 |                  | 223.7817              | Fe II | $3d^7$                 | $3d^6(^3F_2)4p$          | [1]       |
|     |                 |                  | 223.7827              | Fe II | $3d^7$                 | $3d^6(^3H)4p$            | [1]       |
|     |                 |                  | 223.78981             | Fe II | $3d^6(^1G_2)4s$        | $3d^6(^1D_2)4p$          | [1]       |
| 87  | 224.181         | 73               | 224.18235             | Fe II | $3d^7$                 | $3d^6(^3F_2)4p$          | [1]       |
|     |                 |                  | 224.187733            | Fe II | $3d^6(^3H)4p$          | $3d^6(^3F_2)4d$          | [1]       |
| 88  | 224.422         | 44               | 224.407646            | Fe II | $3d^6(^3H)4p$          | $3d^6(^3F_2)4d$          | [1]       |
|     |                 |                  | 224.42072             | Fe II | $3d^6(^5D)4p$          | $3d^6(^5D)4d$            | [1]       |
| 89  | 224.482         | 18               | 224.48254             | Fe II | $3d^6(^3H)4p$          | $3d^6(^3H)4d$            | [1]       |
|     |                 |                  | 224.49163             | Fe II | $3d^6(^3G)4p$          | $3d^6(^3G)4d$            | [1]       |
| 90  | 224.555         | 22               | 224.549895            | Fe II | $3d^6(^5D)4p$          | $3d^6(^5D)4d$            | [1]       |
|     |                 |                  | 224.55806             | Fe II | $3d^6(^3H)4p$          | $3d^6(^3H)4d$            | [1]       |
|     |                 |                  | 224.56526             | Fe I  | $3d^64s^2$             | $3d^6(^3P_2)4s4p(^3P^o)$ | [2]       |
| 91  | 224.772         | 42               | 224.768366            | Fe II | $3d^6(^5D)4p$          | $3d^6(^5D)4d$            | [1]       |
|     |                 |                  | 224.77972             | Fe II | $3d^6(^3H)4p$          | $3d^6(^5D)5d$            | [1]       |
|     |                 |                  | 224.7812              | Fe II | $3d^6(^3H)4p$          | $3d^6(^5D)5d$            | [1]       |
| 92  | 224.916         | 29               | 224.905864            | Fe II | $3d^6(^5D)4p$          | $3d^6(^5D)4d$            | [1]       |
|     |                 |                  | 224.905864            | Fe II | $3d^6(^5D)4p$          | $3d^6(^5D)4d$            | [1]       |
|     |                 |                  | 224.91063             | Fe II | $3d^6(^3H)4p$          | $3d^6(^3G)4d$            | [1]       |
|     |                 |                  | 224.917788            | Fe II | $3d^6(^5D)4s$          | $3d^6(^5D)4p$            | [1]       |
|     |                 |                  | 224.919855            | Fe II | $3d^6(^5D)4p$          | $3d^6(^5D)4d$            | [1]       |
|     |                 |                  | 224.92854             | Fe II | $3d^6(^3H)4p$          | $3d^6(^3F_2)4d$          | [1]       |
| 93  | 224.976         | 23               | 224.96229             | Fe II | $3d^6(^3H)4p$          | $3d^6(^3F_2)4d$          | [1]       |
|     |                 |                  | 224.9698              | Fe II | $3d^6(^3P_2)4s$        | $3d^6(^3P_2)4p$          | [1]       |
|     |                 |                  | 224.97556             | Fe II | $3d^6(^3F_2)4p$        | $3d^54s(^7S)4d$          | [1]       |
|     |                 |                  | 224.98907             | Fe II | $3d^6(^3H)4p$          | $3d^6(^3F_2)4d$          | [1]       |
| 94  | 225.049         | 29               | 225.04092             | Fe II | $3d^6(^3H)4p$          | $3d^6(^3F_2)4d$          | [1]       |
|     |                 |                  | 225.043752            | Fe II | $3d^5(^6S)4s4p(^3P^o)$ | $3d^54s(^7S)5s$          | [1]       |
|     |                 |                  | 225.0615              | Fe II | $3d^6(^3H)4p$          | $3d^6(^3F_2)4d$          | [1]       |
| 95  | 225.085         | 66               | 225.07902             | Fe I  | $3d^64s^2$             | $3d^6(^3F_2)4s4p(^3P^o)$ | [2]       |
|     |                 |                  | 225.08767             | Fe II | $3d^6(^3H)4p$          | $3d^6(^3H)4d$            | [1]       |
|     |                 |                  | 225.093517            | Fe II | $3d^6(^5D)4s$          | $3d^6(^5D)4p$            | [1]       |
| 96  | 225.181         | 62               | 225.1763              | Fe II | $3d^5(^6S)4s4p(^3P^o)$ | $3d^6(^3D)4d$            | [1]       |
|     |                 |                  | 225.182273            | Fe II | $3d^6(^5D)4p$          | $3d^6(^5D)4d$            | [1]       |
|     |                 |                  | 225.18732             | Fe I  | $3d^64s^2$             | $3d^6(^3P_2)4s4p(^3P^o)$ | [2]       |
| 97  | 225.567         | 41               | 225.55773             | Fe II | $3d^6(^3P_2)4p$        | $3d^6(^3F_2)4d$          | [1]       |
|     |                 |                  | 225.563423            | Fe II | $3d^6(^3H)4p$          | $3d^6(^3G)4d$            | [1]       |

| No. | Wavelength (nm) | Intensity (a.u.) | Wavelength (nm), Ref. | Type  | Lower energy level     | Higher energy level     | Reference |
|-----|-----------------|------------------|-----------------------|-------|------------------------|-------------------------|-----------|
|     |                 |                  | 225.568707            | Fe II | $3d^6(^5D)4p$          | $3d^6(^5D)4d$           | [1]       |
|     |                 |                  | 225.57658             | Fe II | $3d^7$                 | $3d^6(^3P2)4p$          | [1]       |
| 98  | 225.856         | 31               | 225.8489              | Fe II | $3d^6(^3H)4p$          | $3d^6(^3H)4d$           | [1]       |
|     |                 |                  | 225.85653             | Fe II | $3d^6(^3H)4p$          | $3d^6(^3F2)4d$          | [1]       |
|     |                 |                  | 225.8595              | Fe II | $3d^6(^3H)4p$          | $3d^6(^3G)4d$           | [1]       |
| 99  | 225.916         | 33               | 225.9138              | Fe II | $3d^6(^1G1)4s$         | $3d^6(^5D_4)4f$         | [1]       |
|     |                 |                  | 225.92255             | Fe II | $3d^6(^3H)4p$          | $3d^6(^3F2)4d$          | [1]       |
|     |                 |                  | 225.92825             | Fe I  | $3d^64s^2$             | $3d^6(^3F2)4s4p(^3P^o)$ | [2]       |
| 100 | 225.952         | 170              | 225.95101             | Fe I  | $3d^64s^2$             | $3d^6(^3F2)4s4p(^3P^o)$ | [2]       |
|     |                 |                  | 225.95395             | Fe II | $3d^6(^3H)4p$          | $3d^6(^5D)5d$           | [1]       |
|     |                 |                  | 225.95802             | Fe I  | $3d^7(^4F)4s$          | $3d^6(^5D)4s(^6D)5p$    | [2]       |
|     |                 |                  | 225.96253             | Fe II | $3d^6(^1G2)4s$         | $3d^6(^1D2)4p$          | [1]       |
| 101 | 226.013         | 30               | 226.00194             | Fe II | $3d^5(^6S)4s4p(^3P^o)$ | $3d^5(^6S)4p^2$         | [1]       |
|     |                 |                  | 226.007942            | Fe II | $3d^6(^5D)4s$          | $3d^6(^5D)4p$           | [1]       |
|     |                 |                  | 226.011333            | Fe II | $3d^6(^3G)4p$          | $3d^6(^3G)4d$           | [1]       |
|     |                 |                  | 226.0239              | Fe II | $3d^6(^5D)4s$          | $3d^6(^5D)4p$           | [1]       |
|     |                 |                  | 226.0239              | Fe II | $3d^6(^5D)4s$          | $3d^6(^5D)4p$           | [1]       |
| 102 | 226.037         | 45               | 226.0239              | Fe II | $3d^54s^2$             | $3d^5(^4D)4s4p(^3P^o)$  | [1]       |
|     |                 |                  | 226.0239              | Fe II | $3d^6(^5D)4s$          | $3d^6(^5D)4p$           | [1]       |
|     |                 |                  | 226.0323              | Fe II | $3d^6(^3P1)4s$         | $3d^6(^3F1)4p$          | [1]       |
|     |                 |                  | 226.0412              | Fe II | $3d^6(^3H)4p$          | $3d^6(^3F2)4d$          | [1]       |
|     |                 |                  | 226.05173             | Fe II | $3d^6(^3P2)4p$         | $3d^6(^3P2)4d$          | [1]       |
| 103 | 226.229         | 23               | 226.22451             | Fe II | $3d^6(^3F2)4s$         | $3d^6(^3F2)4p$          | [1]       |
|     |                 |                  | 226.2329              | Fe II | $3d^6(^3F2)4p$         | $3d^6(^3G)4d$           | [1]       |
|     |                 |                  | 226.24278             | Fe II | $3d^6(^3H)4p$          | $3d^6(^3F2)4d$          | [1]       |
| 104 | 226.434         | 51               | 226.43199             | Fe II | $3d^6(^3H)4s$          | $3d^6(^3G)4p$           | [1]       |
|     |                 |                  | 226.43891             | Fe I  | $3d^7(^4F)4s$          | $3d^6(^5D)4s(^6D)5p$    | [2]       |
| 105 | 226.494         | 36               | 226.4808              | Fe II | $3d^6(^3H)4p$          | $3d^6(^3H)4d$           | [1]       |
|     |                 |                  | 226.50541             | Fe I  | $3d^64s^2$             | $3d^6(^3F2)4s4p(^3P^o)$ | [2]       |
| 106 | 226.711         | 50               | 226.70845             | Fe I  | $3d^64s^2$             | $3d^7(^4P)4p$           | [2]       |
|     |                 |                  | 226.7236              | Fe II | $3d^6(^3P2)4p$         | $3d^6(^3G)4d$           | [1]       |
| 107 | 226.747         | 81               | 226.74694             | Fe I  | $3d^7(^4F)4s$          | $3d^6(^5D)4s(^6D)5p$    | [2]       |
|     |                 |                  | 226.75292             | Fe II | $3d^6(^3G)4p$          | $3d^6(^3G)4d$           | [1]       |
|     |                 |                  | 226.758567            | Fe II | $3d^6(^5D)4s$          | $3d^6(^5D)4p$           | [1]       |
| 108 | 226.892         | 69               | 226.88216             | Fe II | $3d^6(^5D)4s$          | $3d^6(^5D)4p$           | [1]       |
|     |                 |                  | 226.88673             | Fe II | $3d^6(^3H)4p$          | $3d^6(^5D)5d$           | [1]       |



| No. | Wavelength (nm) | Intensity (a.u.) | Wavelength (nm), Ref. | Type  | Lower energy level | Higher energy level     | Reference |
|-----|-----------------|------------------|-----------------------|-------|--------------------|-------------------------|-----------|
|     |                 |                  | 226.89317             | Fe II | $3d^6(^3H)4p$      | $3d^6(^3H)4d$           | [1]       |
| 109 | 227.181         | 63               | 227.17828             | Fe I  | $3d^7(^4F)4s$      | $3d^6(^5D)4s(^6D)5p$    | [2]       |
|     |                 |                  | 227.18436             | Fe II | $3d^6(^3P2)4s$     | $3d^6(^3P2)4p$          | [1]       |
| 110 | 227.205         | 65               | 227.20694             | Fe I  | $3d^64s^2$         | $3d^6(^3F2)4s4p(^3P^o)$ | [2]       |
|     |                 |                  | 227.21857             | Fe II | $3d^6(^3G)4p$      | $3d^6(^3G)4d$           | [1]       |
|     |                 |                  | 227.21857             | Fe II | $3d^6(^3H)4p$      | $3d^6(^3H)4d$           | [1]       |
| 111 | 227.278         | 24               | 227.281901            | Fe II | $3d^6(^3P2)4p$     | $3d^6(^3P2)4d$          | [1]       |
|     |                 |                  | 227.28192             | Fe I  | $3d^7(^4F)4s$      | $3d^6(^5D)4s(^6D)5p$    | [2]       |
| 112 | 227.603         | 120              | 227.60257             | Fe I  | $3d^64s^2$         | $3d^6(^3P2)4s4p(^3P^o)$ | [2]       |
|     |                 |                  | 227.607433            | Fe II | $3d^6(^3F2)4p$     | $3d^6(^3F2)4d$          | [1]       |
| 113 | 227.808         | 44               | 227.7958              | Fe II | $3d^6(^3F1)4s$     | $3d^6(^4G)4s4p(^3P^o)$  | [1]       |
|     |                 |                  | 227.80092             | Fe II | $3d^6(^3P2)4p$     | $3d^6(^5D)5d$           | [1]       |
|     |                 |                  | 227.803               | Fe II | $3d^7$             | $3d^6(^3F2)4p$          | [1]       |
| 114 | 227.988         | 43               | 227.991462            | Fe II | $3d^6(^5D)4s$      | $3d^6(^5D)4p$           | [1]       |
|     |                 |                  | 227.9937              | Fe I  | $3d^64s^2$         | $3d^6(^3F2)4s4p(^3P^o)$ | [2]       |
| 115 | 228.109         | 28               | 228.1029              | Fe II | $3d^6(^3F2)4s$     | $3d^6(^3G)4p$           | [1]       |
|     |                 |                  | 228.1198              | Fe II | $3d^6(^3G)4p$      | $3d^6(^3G)4d$           | [1]       |
| 116 | 228.253         | 96               | 228.244398            | Fe II | $3d^6(^3G)4p$      | $3d^6(^3G)4d$           | [1]       |
|     |                 |                  | 228.26607             | Fe II | $3d^6(^3P2)4p$     | $3d^6(^5D)5d$           | [1]       |
| 117 | 228.362         | 38               | 228.3484              | Fe II | $3d^6(^5D)4s$      | $3d^6(^5D)4p$           | [1]       |
|     |                 |                  | 228.3504              | Fe II | $3d^6(^3F2)4s$     | $3d^6(^3G)4p$           | [1]       |
|     |                 |                  | 228.3526              | Fe II | $3d^6(^3H)4p$      | $3d^6(^3F2)4d$          | [1]       |
|     |                 |                  | 228.359235            | Fe II | $3d^6(^3F2)4p$     | $3d^6(^3H)4d$           | [1]       |
|     |                 |                  | 228.36551             | Fe I  | $3d^64s^2$         | $3d^6(^3F2)4s4p(^3P^o)$ | [2]       |
|     |                 |                  | 228.369937            | Fe II | $3d^6(^3H)4p$      | $3d^6(^3F2)4d$          | [1]       |
| 118 | 228.41          | 124              | 228.399607            | Fe II | $3d^7$             | $3d^6(^3F2)4p$          | [1]       |
|     |                 |                  | 228.40855             | Fe I  | $3d^64s^2$         | $3d^6(^3P2)4s4p(^3P^o)$ | [2]       |
|     |                 |                  | 228.42271             | Fe II | $3d^7$             | $3d^6(^3P2)4p$          | [1]       |
| 119 | 228.723         | 86               | 228.71032             | Fe II | $3d^6(^3F2)4p$     | $3d^6(^3F2)4d$          | [1]       |
|     |                 |                  | 228.72495             | Fe I  | $3d^64s^2$         | $3d^6(^3P2)4s4p(^3P^o)$ | [2]       |
|     |                 |                  | 228.7293              | Fe I  | $3d^7(^4F)4s$      | $3d^6(^5D)4s(^6D)5p$    | [2]       |
|     |                 |                  | 228.73309             | Fe II | $3d^6(^3P2)4p$     | $3d^6(^3P2)4d$          | [1]       |
| 120 | 228.868         | 24               | 228.8616              | Fe I  | $3d^7(^4F)4s$      | $3d^6(^3G)4s4p(^3P^o)$  | [2]       |
|     |                 |                  | 228.86255             | Fe II | $3d^6(^3H)4p$      | $3d^6(^3F2)4d$          | [1]       |
| 121 | 228.904         | 32               | 228.89679             | Fe II | $3d^6(^3H)4p$      | $3d^6(^3H)4d$           | [1]       |
|     |                 |                  | 228.89681             | Fe I  | $3d^64s^2$         | $3d^6(^3F2)4s4p(^3P^o)$ | [2]       |

| No. | Wavelength (nm) | Intensity (a.u.) | Wavelength (nm), Ref. | Type  | Lower energy level | Higher energy level     | Reference |
|-----|-----------------|------------------|-----------------------|-------|--------------------|-------------------------|-----------|
|     |                 |                  | 228.90308             | Fe I  | $3d^7(^4F)4s$      | $3d^6(^5D)4s(^6D)5p$    | [2]       |
|     |                 |                  | 228.90544             | Fe I  | $3d^7(^4F)4s$      | $3d^6(^5D)4s(^6D)5p$    | [2]       |
|     |                 |                  | 228.91273             | Fe II | $3d^6(^3H)4p$      | $3d^6(^5D)5d$           | [1]       |
|     |                 |                  | 228.91681             | Fe II | $3d^6(^3G)4p$      | $3d^6(^3G)4d$           | [1]       |
|     |                 |                  | 228.9187              | Fe II | $3d^6(^3P2)4p$     | $3d^54s(^7S)4d$         | [1]       |
| 122 | 229.109         | 29               | 229.11198             | Fe I  | $3d^7(^4F)4s$      | $3d^6(^5D)4s(^6D)5p$    | [2]       |
|     |                 |                  | 229.11198             | Fe I  | $3d^7(^4F)4s$      | $3d^6(^5D)4s(^6D)5p$    | [2]       |
| 123 | 229.253         | 145              | 229.2399              | Fe II | $3d^6(^3F2)4p$     | $3d^6(^3G)4d$           | [1]       |
|     |                 |                  | 229.2421              | Fe II | $3d^7$             | $3d^6(^3F2)4p$          | [1]       |
|     |                 |                  | 229.25246             | Fe I  | $3d^64s^2$         | $3d^6(^3F2)4s4p(^3P^o)$ | [2]       |
|     |                 |                  | 229.25982             | Fe II | $3d^6(^3F2)4p$     | $3d^6(^3F2)4d$          | [1]       |
|     |                 |                  | 229.26398             | Fe II | $3d^6(^3H)4p$      | $3d^6(^5D)5d$           | [1]       |
| 124 | 229.446         | 37               | 229.44079             | Fe I  | $3d^64s^2$         | $3d^6(^3P2)4s4p(^3P^o)$ | [2]       |
|     |                 |                  | 229.45615             | Fe II | $3d^6(^3H)4p$      | $3d^6(^3F2)4d$          | [1]       |
|     |                 |                  | 229.46099             | Fe II | $3d^6(^3F2)4s$     | $3d^6(^3G)4p$           | [1]       |
| 125 | 229.579         | 26               | 229.5861              | Fe II | $3d^6(^3G)4p$      | $3d^6(^3G)4d$           | [1]       |
|     |                 |                  | 229.5885              | Fe II | $3d^54s^2$         | $3d^6(^5D_1)4f$         | [1]       |
| 126 | 229.687         | 32               | 229.67658             | Fe II | $3d^7$             | $3d^6(^3P2)4p$          | [1]       |
|     |                 |                  | 229.68745             | Fe II | $3d^6(^3H)4p$      | $3d^6(^5D)5d$           | [1]       |
|     |                 |                  | 229.6879              | Fe II | $3d^7$             | $3d^6(^3F2)4p$          | [3]       |
|     |                 |                  | 229.689095            | Fe II | $3d^6(^3F2)4p$     | $3d^6(^5D)5d$           | [1]       |
|     |                 |                  | 229.69267             | Fe I  | $3d^64s^2$         | $3d^6(^3P2)4s4p(^3P^o)$ | [2]       |
| 127 | 229.783         | 135              | 229.7787              | Fe I  | $3d^64s^2$         | $3d^6(^3P2)4s4p(^3P^o)$ | [2]       |
|     |                 |                  | 229.78024             | Fe II | $3d^6(^3F2)4p$     | $3d^6(^5D)5d$           | [1]       |
| 128 | 229.819         | 655              | 229.81688             | Fe I  | $3d^64s^2$         | $3d^6(^3P2)4s4p(^3P^o)$ | [2]       |
|     |                 |                  | 229.82219             | Fe II | $3d^7$             | $3d^6(^3P2)4p$          | [1]       |
| 129 | 229.928         | 42               | 229.91338             | Fe II | $3d^6(^3H)4p$      | $3d^6(^3F2)4d$          | [1]       |
|     |                 |                  | 229.922               | Fe I  | $3d^64s^2$         | $3d^6(^3P2)4s4p(^3P^o)$ | [2]       |
|     |                 |                  | 229.9314              | Fe II | $3d^6(^3H)4p$      | $3d^6(^3H)4d$           | [1]       |
|     |                 |                  | 229.94209             | Fe II | $3d^6(^3P2)4p$     | $3d^6(^3P2)4d$          | [1]       |
| 130 | 230.012         | 141              | 229.9975              | Fe II | $3d^6(^3H)4p$      | $3d^6(^3H)4d$           | [1]       |
|     |                 |                  | 230.01417             | Fe I  | $3d^64s^2$         | $3d^6(^3F2)4s4p(^3P^o)$ | [2]       |
|     |                 |                  | 230.02513             | Fe I  | $3d^64s^2$         | $3d^6(^3H)4s4p(^3P^o)$  | [2]       |
| 131 | 230.06          | 31               | 230.04811             | Fe II | $3d^6(^3P2)4s$     | $3d^6(^3F2)4p$          | [1]       |
|     |                 |                  | 230.05238             | Fe II | $3d^6(^3P2)4p$     | $3d^6(^5D)6s$           | [1]       |
|     |                 |                  | 230.05976             | Fe I  | $3d^7(^4F)4s$      | $3d^6(^1G2)4s4p(^3P^o)$ | [2]       |

| No. | Wavelength (nm) | Intensity (a.u.) | Wavelength (nm), Ref. | Type  | Lower energy level | Higher energy level     | Reference |
|-----|-----------------|------------------|-----------------------|-------|--------------------|-------------------------|-----------|
|     |                 |                  | 230.06248             | Fe II | $3d^6(^3G)4p$      | $3d^6(^3G)4d$           | [1]       |
|     |                 |                  | 230.06248             | Fe II | $3d^6(^3H)4p$      | $3d^6(^3F2)4d$          | [1]       |
|     |                 |                  | 230.0654              | Fe II | $3d^6(^3P1)4s$     | $3d^5(^4D)4s4p(^3P^o)$  | [1]       |
| 132 | 230.121         | 34               | 230.117375            | Fe II | $3d^6(^5D)4p$      | $3d^6(^5D)4d$           | [1]       |
|     |                 |                  | 230.11739             | Fe I  | $3d^64s^2$         | $3d^6(^3H)4s4p(^3P^o)$  | [2]       |
|     |                 |                  | 230.13242             | Fe II | $3d^6(^3H)4p$      | $3d^6(^3H)4d$           | [1]       |
| 133 | 230.181         | 52               | 230.16837             | Fe I  | $3d^64s^2$         | $3d^6(^3P2)4s4p(^3P^o)$ | [2]       |
|     |                 |                  | 230.18985             | Fe II | $3d^6(^3P2)4p$     | $3d^6(^3F2)4d$          | [1]       |
| 134 | 230.699         | 41               | 230.68554             | Fe II | $3d^6(^3F2)4p$     | $3d^6(^3G)4d$           | [1]       |
|     |                 |                  | 230.6996              | Fe II | $3d^6(^3P2)4p$     | $3d^6(^5D)5d$           | [1]       |
|     |                 |                  | 230.707741            | Fe II | $3d^6(^3F2)4p$     | $3d^6(^5D)5d$           | [1]       |
| 135 | 230.904         | 76               | 230.8931              | Fe II | $3d^6(^3F1)4s$     | $3d^6(^3F1)4p$          | [1]       |
|     |                 |                  | 230.89988             | Fe I  | $3d^64s^2$         | $3d^6(^3P2)4s4p(^3P^o)$ | [2]       |
|     |                 |                  | 230.90475             | Fe II | $3d^6(^3H)4p$      | $3d^6(^3H)4d$           | [1]       |
|     |                 |                  | 230.9093              | Fe II | $3d^6(^3P1)4s$     | $3d^5(^4D)4s4p(^3P^o)$  | [1]       |
| 136 | 231.12          | 139              | 231.1068              | Fe II | $3d^6(^3P2)4s$     | $3d^6(^3F2)4p$          | [1]       |
|     |                 |                  | 231.12244             | Fe II | $3d^6(^3P2)4p$     | $3d^6(^3F2)4d$          | [1]       |
|     |                 |                  | 231.12244             | Fe II | $3d^6(^3H)4s$      | $3d^6(^3G)4p$           | [1]       |
|     |                 |                  | 231.12891             | Fe II | $3d^6(^3F1)4s$     | $3d^6(^3F1)4p$          | [1]       |
|     |                 |                  | 231.12891             | Fe II | $3d^6(^3F1)4s$     | $3d^6(^3F1)4p$          | [1]       |
| 137 | 231.169         | 24               | 231.1607              | Fe II | $3d^6(^3G)4s$      | $3d^5(^5S)4s4p(^3P^o)$  | [1]       |
|     |                 |                  | 231.1838              | Fe II | $3d^6(^3D)4s$      | $3d^6(^3D)4p$           | [1]       |
| 138 | 231.313         | 113              | 231.31039             | Fe I  | $3d^64s^2$         | $3d^6(^3P2)4s4p(^3P^o)$ | [2]       |
|     |                 |                  | 231.32615             | Fe II | $3d^6(^3F2)4p$     | $3d^6(^3F2)4d$          | [1]       |
| 139 | 231.554         | 24               | 231.54808             | Fe II | $3d^6(^3P2)4p$     | $3d^6(^3H)4d$           | [1]       |
|     |                 |                  | 231.553529            | Fe II | $3d^6(^3F2)4p$     | $3d^6(^3P2)4d$          | [1]       |
|     |                 |                  | 231.5616              | Fe II | $3d^6(^3F2)4p$     | $3d^54s(^7S)4d$         | [1]       |
| 140 | 231.578         | 44               | 231.572926            | Fe II | $3d^6(^3F2)4p$     | $3d^6(^3F2)4d$          | [1]       |
|     |                 |                  | 231.57803             | Fe II | $3d^6(^3F2)4p$     | $3d^6(^3P2)4d$          | [1]       |
|     |                 |                  | 231.58248             | Fe II | $3d^6(^3H)4p$      | $3d^6(^3H)4d$           | [1]       |
|     |                 |                  | 231.5858              | Fe II | $3d^6(^3F2)4p$     | $3d^54s(^7S)4d$         | [1]       |
| 141 | 231.747         | 36               | 231.735121            | Fe II | $3d^6(^3F2)4p$     | $3d^6(^3F2)4d$          | [1]       |
|     |                 |                  | 231.738036            | Fe II | $3d^6(^3F2)4s$     | $3d^6(^3G)4p$           | [1]       |
|     |                 |                  | 231.738036            | Fe II | $3d^6(^3P2)4p$     | $3d^6(^5D)6s$           | [1]       |
|     |                 |                  | 231.7452              | Fe II | $3d^6(^3H)4p$      | $3d^6(^3H)4d$           | [1]       |
|     |                 |                  | 231.75956             | Fe II | $3d^6(^3F2)4p$     | $3d^6(^3F2)4d$          | [1]       |

| No. | Wavelength (nm) | Intensity (a.u.) | Wavelength (nm), Ref. | Type  | Lower energy level     | Higher energy level      | Reference |
|-----|-----------------|------------------|-----------------------|-------|------------------------|--------------------------|-----------|
| 142 | 232.036         | 177              | 232.03576             | Fe I  | $3d^6 4s^2$            | $3d^6(^3P_2)4s4p(^3P^o)$ | [2]       |
|     |                 |                  | 232.040465            | Fe II | $3d^6(^3F_2)4p$        | $3d^6(^3P_2)4d$          | [1]       |
| 143 | 232.506         | 31               | 232.50336             | Fe II | $3d^6(^3F_2)4p$        | $3d^6(^3F_2)4d$          | [1]       |
|     |                 |                  | 232.50336             | Fe II | $3d^6(^3H)4p$          | $3d^6(^3H)4d$            | [1]       |
|     |                 |                  | 232.5099              | Fe II | $3d^6(^3H)4p$          | $3d^6(^3F_2)4d$          | [1]       |
|     |                 |                  | 232.51749             | Fe II | $3d^6(^3F_2)4p$        | $3d^6(^3P_2)4d$          | [1]       |
|     |                 |                  | 232.5194              | Fe II | $3d^6(^3H)4p$          | $3d^6(^3G)5s$            | [1]       |
| 144 | 232.638         | 29               | 232.63607             | Fe II | $3d^6(^3F_1)4s$        | $3d^6(^3F_1)4p$          | [1]       |
|     |                 |                  | 232.64125             | Fe II | $3d^6(^3F_2)4p$        | $3d^6(^3H)4d$            | [1]       |
| 145 | 232.735         | 80               | 232.7239              | Fe II | $3d^5(^6S)4s4p(^3P^o)$ | $3d^6(^5D)5d$            | [1]       |
|     |                 |                  | 232.739551            | Fe II | $3d^6(^5D)4s$          | $3d^6(^5D)4p$            | [1]       |
|     |                 |                  | 232.74891             | Fe II | $3d^6(^3F_2)4p$        | $3d^6(^3F_2)4d$          | [1]       |
| 146 | 232.988         | 97               | 232.9742              | Fe I  | $3d^6 4s^2$            | $3d^6(^3H)4s4p(^3P^o)$   | [2]       |
|     |                 |                  | 232.9885              | Fe II | $3d^6(^3F_2)4p$        | $3d^6(^5D)5d$            | [1]       |
|     |                 |                  | 232.9885              | Fe II | $3d^6(^3P_2)4p$        | $3d^6(^5D)5d$            | [1]       |
|     |                 |                  | 232.999216            | Fe II | $3d^6(^3F_2)4p$        | $3d^6(^3F_2)4d$          | [1]       |
| 147 | 233.084         | 31               | 233.08255             | Fe II | $3d^6(^3P_2)4p$        | $3d^6(^3G)5s$            | [1]       |
|     |                 |                  | 233.09046             | Fe II | $3d^6(^3H)4p$          | $3d^6(^5D)5d$            | [1]       |
| 148 | 233.277         | 371              | 233.26446             | Fe II | $3d^6(^3P_2)4p$        | $3d^6(^3H)4d$            | [1]       |
|     |                 |                  | 233.279877            | Fe II | $3d^6(^5D)4s$          | $3d^6(^5D)4p$            | [1]       |
|     |                 |                  | 233.2905              | Fe II | $3d^6(^3P_1)4s$        | $3d^5(^4G)4s4p(^3P^o)$   | [1]       |
| 149 | 233.807         | 225              | 233.79594             | Fe II | $3d^6(^3F_2)4p$        | $3d^6(^5D)5d$            | [1]       |
|     |                 |                  | 233.800624            | Fe II | $3d^6(^5D)4s$          | $3d^6(^5D)4p$            | [1]       |
|     |                 |                  | 233.81482             | Fe II | $3d^6(^3F_2)4p$        | $3d^6(^5D)5d$            | [1]       |
|     |                 |                  | 233.8204              | Fe II | $3d^6(^3G)4s$          | $3d^6(^1G_2)4p$          | [1]       |
| 150 | 233.963         | 40               | 233.96452             | Fe I  | $3d^6(^5D)4s4p(^3P^o)$ |                          | [2]       |
|     |                 |                  | 233.96594             | Fe II | $3d^6(^3H)4p$          | $3d^6(^3H)4d$            | [1]       |
|     |                 |                  | 233.97596             | Fe II | $3d^6(^3F_2)4p$        | $3d^6(^3F_2)4d$          | [1]       |
| 151 | 234.18          | 36               | 234.17756             | Fe II | $3d^6(^3P_2)4p$        | $3d^6(^3F_2)4d$          | [1]       |
|     |                 |                  | 234.18023             | Fe II | $3d^6(^3P_2)4p$        | $3d^6(^3F_2)4d$          | [1]       |
|     |                 |                  | 234.18375             | Fe II | $3d^6(^3F_2)4p$        | $3d^6(^3F_2)4d$          | [1]       |
| 152 | 234.397         | 84               | 234.3851              | Fe II | $3d^6(^3F_2)4p$        | $3d^6(^3D)5s$            | [1]       |
|     |                 |                  | 234.396076            | Fe II | $3d^7$                 | $3d^6(^5D)4p$            | [1]       |
|     |                 |                  | 234.3999              | Fe II | $3d^6(^3F_2)4p$        | $3d^6(^3H)4d$            | [1]       |
| 153 | 234.433         | 190              | 234.428135            | Fe II | $3d^6(^5D)4s$          | $3d^6(^5D)4p$            | [1]       |
|     |                 |                  | 234.44653             | Fe II | $3d^6(^3H)4p$          | $3d^6(^3P_2)4d$          | [1]       |

| No. | Wavelength (nm) | Intensity (a.u.) | Wavelength (nm), Ref. | Type  | Lower energy level     | Higher energy level    | Reference |
|-----|-----------------|------------------|-----------------------|-------|------------------------|------------------------|-----------|
|     |                 |                  | 234.44653             | Fe II | $3d^6(^3H)4p$          | $3d^6(^3P_2)4d$        | [1]       |
| 154 | 234.457         | 40               | 234.44653             | Fe II | $3d^6(^3F_2)4p$        | $3d^6(^5D)5d$          | [1]       |
|     |                 |                  | 234.44653             | Fe II | $3d^6(^3H)4p$          | $3d^6(^3P_2)4d$        | [1]       |
|     |                 |                  | 234.460275            | Fe II | $3d^6(^3F_2)4p$        | $3d^6(^3F_2)4d$        | [1]       |
|     |                 |                  | 234.49541             | Fe II | $3d^6(^3D)4p$          | $3d^6(^5D)6d$          | [1]       |
| 155 | 234.505         | 42               | 234.498419            | Fe II | $3d^6(^3P_2)4p$        | $3d^6(^3F_2)4d$        | [1]       |
|     |                 |                  | 234.498419            | Fe II | $3d^6(^3G)4p$          | $3d^6(^3G)4d$          | [1]       |
|     |                 |                  | 234.50274             | Fe I  | $3d^7(^4F)4s$          | $3d^6(^5D)4s (^6D)5p$  | [2]       |
|     |                 |                  | 234.5037              | Fe I  | $3d^6(^5D)4s4p(^3P^o)$ |                        | [2]       |
|     |                 |                  | 234.51785             | Fe II | $3d^6(^3G)4s$          | $3d^6(^1G_2)4p$        | [1]       |
|     |                 |                  | 234.51785             | Fe II | $3d^6(^3G)4s$          | $3d^6(^1G_2)4p$        | [1]       |
| 156 | 234.529         | 52               | 234.533697            | Fe II | $3d^6(^3H)4s$          | $3d^6(^3F_2)4p$        | [1]       |
|     |                 |                  | 234.53639             | Fe II | $3d^6(^3P_2)4p$        | $3d^6(^3F_2)4d$        | [1]       |
|     |                 |                  | 234.62691             | Fe II | $3d^7$                 | $3d^6(^3D)4p$          | [1]       |
| 157 | 234.638         | 29               | 234.62691             | Fe II | $3d^6(^5D)4p$          | $3d^6(^5D)4d$          | [1]       |
|     |                 |                  | 234.62943             | Fe II | $3d^6(^3F_2)4p$        | $3d^6(^3H)4d$          | [1]       |
|     |                 |                  | 234.6307              | Fe I  | $3d^64s^2$             | $3d^6(^3H)4s4p(^3P^o)$ | [2]       |
|     |                 |                  | 234.635412            | Fe II | $3d^6(^3G)4p$          | $3d^6(^3G)4d$          | [1]       |
|     |                 |                  | 234.65112             | Fe II | $3d^6(^5D)4p$          | $3d^6(^5D)4d$          | [1]       |
|     |                 |                  | 234.65112             | Fe II | $3d^6(^5D)4p$          | $3d^6(^5D)4d$          | [1]       |
| 158 | 234.662         | 38               | 234.661657            | Fe II | $3d^6(^3G)4p$          | $3d^6(^3G)4d$          | [1]       |
|     |                 |                  | 234.668111            | Fe II | $3d^6(^3P_2)4p$        | $3d^6(^3P_2)4d$        | [1]       |
|     |                 |                  | 234.926888            | Fe II | $3d^6(^3G)4p$          | $3d^6(^3G)4d$          | [1]       |
| 159 | 234.927         | 25               | 234.926888            | Fe II | $3d^6(^3D)4p$          | $3d^6(^5D)6d$          | [1]       |
|     |                 |                  | 234.9331              | Fe II | $3d^6(^3F_2)4p$        | $3d^54s(^7S)4d$        | [1]       |
|     |                 |                  | 234.94121             | Fe II | $3d^6(^3H)4p$          | $3d^6(^5D)5d$          | [1]       |
|     |                 |                  | 235.017736            | Fe II | $3d^6(^5D)4p$          | $3d^6(^5D)4d$          | [1]       |
| 160 | 235.023         | 41               | 235.024695            | Fe II | $3d^6(^3G)4p$          | $3d^6(^3G)4d$          | [1]       |
|     |                 |                  | 235.03531             | Fe II | $3d^5(^6S)4s4p(^3P^o)$ | $3d^6(^5D)5d$          | [1]       |
|     |                 |                  | 235.22145             | Fe II | $3d^6(^3D)4p$          | $3d^6(^5D)6d$          | [1]       |
| 161 | 235.228         | 61               | 235.230893            | Fe II | $3d^6(^5D)4p$          | $3d^6(^5D)4d$          | [1]       |
|     |                 |                  | 235.23309             | Fe II | $3d^6(^3P_2)4p$        | $3d^6(^3F_2)4d$        | [1]       |
|     |                 |                  | 235.346962            | Fe II | $3d^6(^3H)4p$          | $3d^6(^3H)4d$          | [1]       |
| 162 | 235.361         | 75               | 235.360763            | Fe II | $3d^6(^3F_2)4p$        | $3d^6(^3F_2)4d$        | [1]       |
|     |                 |                  | 235.367834            | Fe II | $3d^6(^3H)4p$          | $3d^6(^3H)4d$          | [1]       |
|     |                 |                  | 235.367834            | Fe II | $3d^6(^5D)4p$          | $3d^6(^5D)4d$          | [1]       |

| No. | Wavelength (nm) | Intensity (a.u.) | Wavelength (nm), Ref. | Type  | Lower energy level     | Higher energy level | Reference |
|-----|-----------------|------------------|-----------------------|-------|------------------------|---------------------|-----------|
|     |                 |                  | 235.3745              | Fe II | $3d^6(^3F_2)4s$        | $3d^6(^3F_2)4p$     | [1]       |
|     |                 |                  | 235.3745              | Fe II | $3d^6(^3H)4p$          | $3d^6(^3H)4d$       | [1]       |
| 163 | 235.445         | 43               | 235.43733             | Fe II | $3d^6(^3H)4p$          | $3d^6(^3H)4d$       | [1]       |
|     |                 |                  | 235.44301             | Fe II | $3d^6(^3G)4p$          | $3d^6(^3G)4d$       | [1]       |
|     |                 |                  | 235.44301             | Fe II | $3d^6(^3F_2)4p$        | $3d^54s(^7S)4d$     | [1]       |
|     |                 |                  | 235.447758            | Fe II | $3d^6(^3H)4s$          | $3d^6(^3F_2)4p$     | [1]       |
| 164 | 235.493         | 44               | 235.488966            | Fe II | $3d^7$                 | $3d^6(^5D)4p$       | [1]       |
|     |                 |                  | 235.5055              | Fe II | $3d^7$                 | $3d^6(^5D)5p$       | [1]       |
| 165 | 235.517         | 57               | 235.5055              | Fe II | $3d^7$                 | $3d^6(^5D)5p$       | [1]       |
|     |                 |                  | 235.51413             | Fe II | $3d^6(^3P_2)4p$        | $3d^6(^3P_2)4d$     | [1]       |
|     |                 |                  | 235.521585            | Fe II | $3d^7$                 | $3d^6(^3P_2)4p$     | [1]       |
|     |                 |                  | 235.521585            | Fe II | $3d^6(^3H)4s$          | $3d^6(^3F_2)4p$     | [1]       |
| 166 | 235.541         | 47               | 235.535013            | Fe II | $3d^6(^5D)4p$          | $3d^6(^5D)4d$       | [1]       |
|     |                 |                  | 235.54634             | Fe II | $3d^6(^3F_2)4p$        | $3d^6(^3H)4d$       | [1]       |
| 167 | 235.722         | 48               | 235.72686             | Fe II | $3d^6(^3H)4p$          | $3d^6(^3H)4d$       | [1]       |
|     |                 |                  | 235.7347              | Fe II | $3d^6(^3D)4p$          | $3d^6(^5D)6d$       | [1]       |
| 168 | 235.915         | 455              | 235.90258             | Fe II | $3d^6(^3F_1)4s$        | $3d^6(^3F_1)4p$     | [1]       |
|     |                 |                  | 235.90258             | Fe II | $3d^5(^6S)4s4p(^3P^o)$ | $3d^6(^5D)5d$       | [1]       |
|     |                 |                  | 235.910691            | Fe II | $3d^6(^5D)4s$          | $3d^6(^5D)4p$       | [1]       |
|     |                 |                  | 235.913231            | Fe II | $3d^6(^3H)4s$          | $3d^6(^3F_2)4p$     | [1]       |
|     |                 |                  | 235.915259            | Fe II | $3d^6(^3G)4p$          | $3d^6(^3G)4d$       | [1]       |
| 169 | 235.999         | 183              | 235.99052             | Fe II | $3d^6(^3H)4p$          | $3d^6(^3H)4d$       | [1]       |
|     |                 |                  | 235.99433             | Fe II | $3d^6(^3F_2)4p$        | $3d^6(^5D)5d$       | [1]       |
|     |                 |                  | 235.999939            | Fe II | $3d^7$                 | $3d^6(^5D)4p$       | [1]       |
|     |                 |                  | 236.005185            | Fe II | $3d^6(^3H)4p$          | $3d^6(^3H)4d$       | [1]       |
| 170 | 236.169         | 40               | 236.1562              | Fe II | $3d^5(^6S)4s4p(^3P^o)$ | $3d^6(^5D)5d$       | [1]       |
|     |                 |                  | 236.172581            | Fe II | $3d^6(^3H)4s$          | $3d^6(^3F_2)4p$     | [1]       |
|     |                 |                  | 236.17593             | Fe II | $3d^6(^3F_2)4p$        | $3d^6(^3P_2)4d$     | [1]       |
| 171 | 236.254         | 29               | 236.24834             | Fe II | $3d^6(^3F_2)4p$        | $3d^6(^5D)5d$       | [1]       |
|     |                 |                  | 236.25358             | Fe II | $3d^6(^3G)4p$          | $3d^6(^3G)4d$       | [1]       |
|     |                 |                  | 236.263               | Fe I  | $3d^7(^4F)4s$          | $3d^7(^4F)5p$       | [2]       |
| 172 | 236.315         | 59               | 236.30956             | Fe II | $3d^6(^3H)4p$          | $3d^6(^3H)4d$       | [1]       |
|     |                 |                  | 236.31203             | Fe II | $3d^6(^3P_2)4p$        | $3d^6(^3F_2)4d$     | [1]       |
|     |                 |                  | 236.32962             | Fe II | $3d^6(^3P_2)4p$        | $3d^6(^5D)5d$       | [1]       |
| 173 | 236.351         | 89               | 236.34658             | Fe II | $3d^6(^3P_2)4p$        | $3d^6(^5D)5d$       | [1]       |
|     |                 |                  | 236.350026            | Fe II | $3d^6(^3H)4p$          | $3d^6(^3H)4d$       | [1]       |

| No. | Wavelength (nm) | Intensity (a.u.) | Wavelength (nm), Ref. | Type  | Lower energy level           | Higher energy level           | Reference |
|-----|-----------------|------------------|-----------------------|-------|------------------------------|-------------------------------|-----------|
|     |                 |                  | 236.35894             | Fe II | $3d^6(^3G)4p$                | $3d^6(^3G)4d$                 | [1]       |
|     |                 |                  | 236.36397             | Fe II | $3d^6(^3H)4s$                | $3d^6(^3F2)4p$                | [1]       |
| 174 | 236.448         | 381              | 236.43501             | Fe II | $3d^6(^3D)4p$                | $3d^6(^5D)6d$                 | [1]       |
|     |                 |                  | 236.4437              | Fe I  | $3d^7(^4F)4s$                | $3d^6(^5D)4s(^6D)5p$          | [2]       |
|     |                 |                  | 236.45882             | Fe II | $3d^6(^3D)4p$                | $3d^6(^5D)6d$                 | [1]       |
|     |                 |                  | 236.45882             | Fe II | $3d^6(^3H)4p$                | $3d^6(^3P2)4d$                | [1]       |
| 175 | 236.545         | 91               | 236.532026            | Fe II | $3d^6(^3P2)4p$               | $3d^6(^3P2)4d$                | [1]       |
|     |                 |                  | 236.532041            | Fe I  |                              |                               | [2]       |
|     |                 |                  | 236.53546             | Fe II | $3d^6(^3D)4p$                | $3d^6(^5D)6d$                 | [1]       |
|     |                 |                  | 236.55149             | Fe I  | $3d^7(^4F)4s$                | $3d^6(^3G)4s4p(^3P^{\circ})$  | [2]       |
|     |                 |                  | 236.55391             | Fe II | $3d^6(^3F2)4p$               | $3d^6(^5D)5d$                 | [1]       |
| 176 | 236.63          | 45               | 236.632               | Fe II | $3d^6(^3G)4p$                | $3d^6(^3G)4d$                 | [1]       |
|     |                 |                  | 236.632               | Fe II | $3d^6(^3H)4p$                | $3d^6(^3P2)4d$                | [1]       |
|     |                 |                  | 236.64291             | Fe II | $3d^6(^3H)4p$                | $3d^6(^3H)4d$                 | [1]       |
| 177 | 236.824         | 76               | 236.81359             | Fe II | $3d^5(^6S)4s4p(^3P^{\circ})$ | $3d^6(^3H)4d$                 | [1]       |
|     |                 |                  | 236.82331             | Fe II | $3d^6(^5D)4p$                | $3d^6(^5D)4d$                 | [1]       |
|     |                 |                  | 236.83809             | Fe II | $3d^6(^3F2)4p$               | $3d^6(^3F2)4d$                | [1]       |
| 178 | 236.958         | 129              | 236.94561             | Fe I  | $3d^64s^2$                   | $3d^6(^3P2)4s4p(^3P^{\circ})$ | [2]       |
|     |                 |                  | 236.95004             | Fe II | $3d^6(^3G)4p$                | $3d^6(^3D)5s$                 | [1]       |
|     |                 |                  | 236.9524              | Fe II | $3d^6(^3D)4p$                | $3d^6(^5D)6d$                 | [1]       |
|     |                 |                  | 236.966245            | Fe II | $3d^6(^3F2)4p$               | $3d^6(^3F2)4d$                | [1]       |
|     |                 |                  | 236.972709            | Fe II | $3d^6(^3G)4p$                | $3d^6(^3G)4d$                 | [1]       |
| 179 | 237.14          | 372              | 237.14303             | Fe I  | $3d^64s^2$                   | $3d^6(^3P2)4s4p(^3P^{\circ})$ | [2]       |
|     |                 |                  | 237.14564             | Fe II | $3d^6(^3D)4p$                | $3d^6(^5D)6d$                 | [1]       |
| 180 | 237.261         | 51               | 237.263283            | Fe II | $3d^6(^1G2)4s$               | $3d^6(^3D)4p$                 | [1]       |
|     |                 |                  | 237.274               | Fe II | $3d^6(^3G)4p$                | $3d^6(^3D)5s$                 | [1]       |
| 181 | 237.346         | 435              | 237.3379              | Fe II | $3d^6(^3F2)4p$               | $3d^6(^3F2)4d$                | [1]       |
|     |                 |                  | 237.34359             | Fe II | $3d^6(^3G)4p$                | $3d^6(^3G)4d$                 | [1]       |
|     |                 |                  | 237.35147             | Fe II | $3d^6(^3D)4p$                | $3d^6(^5D)6d$                 | [1]       |
|     |                 |                  | 237.3608              | Fe II | $3d^6(^3P1)4s$               | $3d^5(^4G)4s4p(^3P^{\circ})$  | [1]       |
| 182 | 237.431         | 71               | 237.420854            | Fe II | $3d^6(^3F2)4p$               | $3d^6(^3F2)4d$                | [1]       |
|     |                 |                  | 237.43452             | Fe II | $3d^6(^3H)4p$                | $3d^6(^5D)5d$                 | [1]       |
|     |                 |                  | 237.439109            | Fe II | $3d^6(^3H)4p$                | $3d^6(^3H)4d$                 | [1]       |
| 183 | 237.491         | 67               | 237.48461             | Fe II | $3d^6(^3D)4p$                | $3d^6(^5D)6d$                 | [1]       |
|     |                 |                  | 237.48745             | Fe II | $3d^6(^3F1)4s$               | $3d^5(^4G)4s4p(^3P^{\circ})$  | [1]       |
|     |                 |                  | 237.499564            | Fe II | $3d^6(^3F2)4p$               | $3d^6(^3F2)4d$                | [1]       |

| No. | Wavelength (nm) | Intensity (a.u.) | Wavelength (nm), Ref. | Type  | Lower energy level     | Higher energy level     | Reference |
|-----|-----------------|------------------|-----------------------|-------|------------------------|-------------------------|-----------|
|     |                 |                  | 237.50423             | Fe II | $3d^6(^3G)4p$          | $3d^6(^3G)4d$           | [1]       |
| 184 | 237.613         | 131              | 237.6066              | Fe II | $3d^6(^3F1)4s$         | $3d^6(^3P1)4p$          | [1]       |
|     |                 |                  | 237.6066              | Fe II | $3d^6(^3D)4p$          | $3d^6(^5D)6d$           | [1]       |
|     |                 |                  | 237.6106              | Fe II | $3d^6(^3H)4p$          | $3d^6(^3H)4d$           | [1]       |
|     |                 |                  | 237.6158              | Fe II | $3d^6(^3D)4p$          | $3d^6(^5D)6d$           | [1]       |
| 185 | 237.782         | 31               | 237.77676             | Fe II | $3d^6(^3D)4p$          | $3d^6(^5D)6d$           | [1]       |
|     |                 |                  | 237.7814              | Fe II | $3d^6(^3F2)4p$         | $3d^6(^3P2)4d$          | [1]       |
|     |                 |                  | 237.78652             | Fe II | $3d^7$                 | $3d^6(^3P2)4p$          | [1]       |
|     |                 |                  | 237.78841             | Fe II | $3d^6(^3G)4p$          | $3d^6(^1I)5s$           | [1]       |
|     |                 |                  | 237.78842             | Fe I  | $3d^7(^4F)4s$          | $3d^7(^4F)5p$           | [2]       |
|     |                 |                  | 237.79523             | Fe II | $3d^6(^3P2)4p$         | $3d^6(^5D)5d$           | [1]       |
| 186 | 237.904         | 98               | 237.89165             | Fe II | $3d^6(^5D)4p$          | $3d^6(^5D)4d$           | [1]       |
|     |                 |                  | 237.89691             | Fe II | $3d^6(^3H)4p$          | $3d^6(^3H)4d$           | [1]       |
|     |                 |                  | 237.90023             | Fe II | $3d^6(^3F2)4s$         | $3d^6(^3F2)4p$          | [1]       |
|     |                 |                  | 237.91429             | Fe II | $3d^6(^3G)4s$          | $3d^6(^3G)4p$           | [1]       |
|     |                 |                  | 237.91692             | Fe II | $3d^6(^1S2)4s$         | $3d^5(^6S)4s4p(^1P^o)$  | [1]       |
| 187 | 238.001         | 41               | 238.00016             | Fe II | $3d^6(^3D)4p$          | $3d^6(^5D)6d$           | [1]       |
|     |                 |                  | 238.01521             | Fe II | $3d^6(^3G)4p$          | $3d^6(^3G)4d$           | [1]       |
| 188 | 238.049         | 170              | 238.0366              | Fe II | $3d^6(^3H)4p$          | $3d^6(^3G)5s$           | [1]       |
|     |                 |                  | 238.0504              | Fe II | $3d^6(^3F2)4p$         | $3d^6(^3F2)4d$          | [1]       |
| 189 | 238.182         | 6919             | 238.1717              | Fe II | $3d^6(^3D)4p$          | $3d^6(^5D)6d$           | [1]       |
|     |                 |                  | 238.18361             | Fe I  | $3d^64s^2$             | $3d^6(^3P2)4s4p(^3P^o)$ | [2]       |
|     |                 |                  | 238.19195             | Fe II | $3d^6(^3G)4p$          | $3d^6(^3G)4d$           | [1]       |
|     |                 |                  | 238.195806            | Fe II | $3d^6(^5D)4p$          | $3d^6(^5D)4d$           | [1]       |
| 190 | 238.304         | 82               | 238.289687            | Fe II | $3d^7$                 | $3d^6(^3H)4p$           | [1]       |
|     |                 |                  | 238.29616             | Fe II | $3d^5(^6S)4s4p(^3P^o)$ | $3d^6(^5D)5d$           | [1]       |
|     |                 |                  | 238.306019            | Fe II | $3d^6(^5D)4s$          | $3d^6(^5D)4p$           | [1]       |
|     |                 |                  | 238.31172             | Fe II | $3d^6(^3F2)4p$         | $3d^6(^3F2)4d$          | [1]       |
|     |                 |                  | 238.3144              | Fe II | $3d^6(^3G)4p$          | $3d^6(^3G)4d$           | [1]       |
| 191 | 238.34          | 29               | 238.3355              | Fe II | $3d^6(^3F2)4p$         | $3d^6(^3H)4d$           | [1]       |
|     |                 |                  | 238.35132             | Fe II | $3d^54s^2$             | $3d^5(^4P)4s4p(^3P^o)$  | [1]       |
|     |                 |                  | 238.3538              | Fe II | $3d^6(^3G)4p$          | $3d^6(^3G)4d$           | [1]       |
| 192 | 238.376         | 52               | 238.36138             | Fe II | $3d^6(^3D)4p$          | $3d^6(^5D)6d$           | [1]       |
|     |                 |                  | 238.3744              | Fe II | $3d^6(^3D)4p$          | $3d^6(^5D)6d$           | [1]       |
|     |                 |                  | 238.3744              | Fe II | $3d^6(^3H)4p$          | $3d^54s(^7S)5s$         | [1]       |
|     |                 |                  | 238.37795             | Fe II | $3d^6(^3H)4p$          | $3d^6(^3G)5s$           | [1]       |



| No. | Wavelength (nm) | Intensity (a.u.) | Wavelength (nm), Ref. | Type  | Lower energy level | Higher energy level    | Reference |
|-----|-----------------|------------------|-----------------------|-------|--------------------|------------------------|-----------|
|     |                 |                  | 238.39018             | Fe II | $3d^6(^3F_2)4p$    | $3d^6(^3F_2)4d$        | [1]       |
| 193 | 238.425         | 143              | 238.41006             | Fe II | $3d^6(^5D)4p$      | $3d^6(^5D)4d$          | [1]       |
|     |                 |                  | 238.43159             | Fe II | $3d^6(^3G)4p$      | $3d^6(^3G)4d$          | [1]       |
|     |                 |                  | 238.438768            | Fe II | $3d^7$             | $3d^6(^5D)4p$          | [1]       |
| 194 | 238.716         | 33               | 238.70838             | Fe II | $3d^6(^3P_2)4p$    | $3d^6(^3P_2)4d$        | [1]       |
|     |                 |                  | 238.71723             | Fe II | $3d^6(^3P_2)4p$    | $3d^6(^3F_2)4d$        | [1]       |
|     |                 |                  | 238.72818             | Fe I  | $3d^7(^4F)4s$      | $3d^7(^4F)5p$          | [2]       |
| 195 | 238.849         | 456              | 238.83425             | Fe II | $3d^6(^3P_2)4p$    | $3d^6(^3F_2)4d$        | [1]       |
|     |                 |                  | 238.838782            | Fe II | $3d^7$             | $3d^6(^3H)4p$          | [1]       |
|     |                 |                  | 238.862863            | Fe II | $3d^6(^5D)4s$      | $3d^6(^5D)4p$          | [1]       |
|     |                 |                  | 238.862863            | Fe II | $3d^6(^3F_2)4p$    | $3d^6(^3P_2)4d$        | [1]       |
| 196 | 238.982         | 181              | 238.97993             | Fe II | $3d^6(^3D)4p$      | $3d^6(^5D)6d$          | [1]       |
|     |                 |                  | 238.98667             | Fe II | $3d^6(^3H)4s$      | $3d^6(^3G)4p$          | [1]       |
| 197 | 239.14          | 29               | 239.1306              | Fe II | $3d^7$             | $3d^6(^3H)4p$          | [1]       |
|     |                 |                  | 239.147824            | Fe II | $3d^7$             | $3d^6(^5D)4p$          | [1]       |
|     |                 |                  | 239.15387             | Fe II | $3d^6(^3P_2)4p$    | $3d^6(^5D)5d$          | [1]       |
| 198 | 239.2           | 35               | 239.19584             | Fe II | $3d^6(^3F_2)4p$    | $3d^6(^3F_2)4d$        | [1]       |
|     |                 |                  | 239.20889             | Fe II | $3d^6(^3P_2)4p$    | $3d^6(^3H)4d$          | [1]       |
|     |                 |                  | 239.21206             | Fe II | $3d^6(^3H)4p$      | $3d^6(^3H)4d$          | [1]       |
|     |                 |                  | 239.214902            | Fe II | $3d^6(^3F_2)4p$    | $3d^6(^3F_2)4d$        | [1]       |
| 199 | 239.237         | 31               | 239.22382             | Fe II | $3d^6(^3D)4p$      | $3d^6(^5D)6d$          | [1]       |
|     |                 |                  | 239.2333              | Fe II | $3d^6(^3F_2)4s$    | $3d^5(^5S)4s4p(^3P^o)$ | [1]       |
|     |                 |                  | 239.24452             | Fe II | $3d^6(^3H)4p$      | $3d^6(^3P_2)4d$        | [1]       |
| 200 | 239.333         | 29               | 239.32459             | Fe II | $3d^6(^3H)4p$      | $3d^6(^3H)4d$          | [1]       |
|     |                 |                  | 239.33412             | Fe II | $3d^6(^3G)4p$      | $3d^6(^3G)4d$          | [1]       |
|     |                 |                  | 239.33836             | Fe II | $3d^6(^3F_2)4p$    | $3d^6(^3P_2)4d$        | [1]       |
| 201 | 239.552         | 3420             | 239.541909            | Fe II | $3d^6(^5D)4s$      | $3d^6(^5D)4p$          | [1]       |
|     |                 |                  | 239.5495              | Fe I  | $3d^7(^4F)4s$      | $3d^7(^2G)4p$          | [2]       |
|     |                 |                  | 239.54954             | Fe II | $3d^6(^3F_2)4p$    | $3d^6(^3H)4d$          | [1]       |
|     |                 |                  | 239.55453             | Fe II | $3d^6(^3H)4p$      | $3d^6(^5D)5d$          | [1]       |
|     |                 |                  | 239.562504            | Fe II | $3d^6(^5D)4s$      | $3d^6(^5D)4p$          | [1]       |
| 202 | 239.915         | 532              | 239.90324             | Fe II | $3d^6(^3F_2)4p$    | $3d^6(^5D)5d$          | [1]       |
|     |                 |                  | 239.90811             | Fe II | $3d^6(^3G)4p$      | $3d^6(^3G)4d$          | [1]       |
|     |                 |                  | 239.90811             | Fe II | $3d^6(^3P_2)4p$    | $3d^6(^3P_2)4d$        | [1]       |
|     |                 |                  | 239.915119            | Fe II | $3d^6(^5D)4p$      | $3d^6(^5D)4d$          | [1]       |
|     |                 |                  | 239.924102            | Fe II | $3d^6(^5D)4s$      | $3d^6(^5D)4p$          | [1]       |

| No. | Wavelength (nm) | Intensity (a.u.) | Wavelength (nm), Ref. | Type  | Lower energy level | Higher energy level | Reference |
|-----|-----------------|------------------|-----------------------|-------|--------------------|---------------------|-----------|
|     |                 |                  | 239.926637            | Fe II | $3d^6(^5D)4p$      | $3d^6(^5D)4d$       | [1]       |
| 203 | 240.024         | 61               | 240.02781             | Fe II | $3d^6(^3F2)4s$     | $3d^6(^3F2)4p$      | [1]       |
|     |                 |                  | 240.034398            | Fe II | $3d^6(^3H)4s$      | $3d^6(^3G)4p$       | [1]       |
| 204 | 240.121         | 24               | 240.11434             | Fe I  | $3d^7(^4F)4s$      | $3d^7(^4F)5p$       | [2]       |
|     |                 |                  | 240.129155            | Fe II | $3d^6(^5D)4p$      | $3d^6(^5D)4d$       | [1]       |
|     |                 |                  | 240.13249             | Fe II | $3d^6(^5D)4p$      | $3d^6(^5D)4d$       | [1]       |
| 205 | 240.266         | 55               | 240.2542              | Fe II | $3d^6(^3D)4p$      | $3d^6(^3D)4d$       | [1]       |
|     |                 |                  | 240.25995             | Fe II | $3d^7$             | $3d^6(^5D)4p$       | [1]       |
|     |                 |                  | 240.263255            | Fe II | $3d^6(^5D)4p$      | $3d^6(^5D)4d$       | [1]       |
|     |                 |                  | 240.270976            | Fe II | $3d^6(^3P2)4p$     | $3d^6(^3P2)4d$      | [1]       |
| 206 | 240.387         | 80               | 240.37627             | Fe II | $3d^6(^5D)4p$      | $3d^6(^5D)4d$       | [1]       |
|     |                 |                  | 240.38325             | Fe II | $3d^6(^3G)4s$      | $3d^6(^3D)4p$       | [1]       |
|     |                 |                  | 240.39444             | Fe II | $3d^6(^3F2)4p$     | $3d^6(^3G)4d$       | [1]       |
|     |                 |                  | 240.39705             | Fe II | $3d^6(^3H)4p$      | $3d^6(^3H)4d$       | [1]       |
| 207 | 240.557         | 31               | 240.5439              | Fe II | $3d^6(^3F2)4p$     | $3d^6(^3P2)4d$      | [1]       |
|     |                 |                  | 240.568263            | Fe II | $3d^6(^5D)4p$      | $3d^6(^5D)4d$       | [1]       |
|     |                 |                  | 240.57057             | Fe II | $3d^6(^3F2)4p$     | $3d^6(^5D)5d$       | [1]       |
| 208 | 240.581         | 48               | 240.568263            | Fe II | $3d^6(^5D)4p$      | $3d^6(^5D)4d$       | [1]       |
|     |                 |                  | 240.57057             | Fe II | $3d^6(^3F2)4p$     | $3d^6(^5D)5d$       | [1]       |
|     |                 |                  | 240.57908             | Fe II | $3d^6(^3D)4p$      | $3d^6(^5D)6d$       | [1]       |
|     |                 |                  | 240.58307             | Fe II | $3d^6(^1F)4s$      | $3d^6(^1F)4p$       | [1]       |
|     |                 |                  | 240.5898              | Fe II | $3d^6(^5D)4p$      | $3d^6(^5D)4d$       | [1]       |
|     |                 |                  | 240.5898              | Fe II | $3d^6(^3H)4p$      | $3d^6(^3H)4d$       | [1]       |
| 209 | 240.653         | 471              | 240.63919             | Fe II | $3d^6(^3F2)4p$     | $3d^6(^5D)5d$       | [1]       |
|     |                 |                  | 240.6494              | Fe II | $3d^6(^1G2)4p$     | $3d^6(^5D)6d$       | [1]       |
|     |                 |                  | 240.666097            | Fe II | $3d^6(^5D)4s$      | $3d^6(^5D)4p$       | [1]       |
| 210 | 240.69          | 370              | 240.67547             | Fe II | $3d^6(^3F2)4p$     | $3d^6(^3G)4d$       | [1]       |
|     |                 |                  | 240.697542            | Fe II | $3d^6(^3G)4p$      | $3d^6(^3G)4d$       | [1]       |
|     |                 |                  | 240.699263            | Fe II | $3d^6(^3D)4s$      | $3d^6(^1G2)4p$      | [1]       |
| 211 | 240.871         | 29               | 240.864822            | Fe II | $3d^6(^5D)4p$      | $3d^6(^5D)4d$       | [1]       |
|     |                 |                  | 240.877445            | Fe II | $3d^6(^3F2)4p$     | $3d^6(^3F2)4d$      | [1]       |
| 212 | 241.041         | 784              | 241.026963            | Fe II | $3d^6(^5D)4p$      | $3d^6(^5D)4d$       | [1]       |
|     |                 |                  | 241.03007             | Fe II | $3d^6(^3F2)4s$     | $3d^6(^3F2)4p$      | [1]       |
|     |                 |                  | 241.04119             | Fe II | $3d^6(^3G)4s$      | $3d^6(^3D)4p$       | [1]       |
|     |                 |                  | 241.051891            | Fe II | $3d^6(^5D)4s$      | $3d^6(^5D)4p$       | [1]       |
|     |                 |                  | 241.05425             | Fe II | $3d^6(^3P2)4p$     | $3d^6(^3P2)4d$      | [1]       |

| No. | Wavelength (nm) | Intensity (a.u.) | Wavelength (nm), Ref. | Type  | Lower energy level | Higher energy level      | Reference |
|-----|-----------------|------------------|-----------------------|-------|--------------------|--------------------------|-----------|
| 213 | 241.101         | 263              | 241.08671             | Fe II | $3d^6(^1G_2)4p$    | $3d^6(^5D)6d$            | [1]       |
|     |                 |                  | 241.09833             | Fe II | $3d^6(^3P_2)4p$    | $3d^6(^5D)5d$            | [1]       |
|     |                 |                  | 241.106689            | Fe II | $3d^6(^5D)4s$      | $3d^6(^5D)4p$            | [1]       |
| 214 | 241.174         | 52               | 241.16795             | Fe II | $3d^6(^3F_1)4s$    | $3d^5(^4G)4s4p(^3P^o)$   | [1]       |
|     |                 |                  | 241.180771            | Fe II | $3d^6(^3F_2)4p$    | $3d^6(^3F_2)4d$          | [1]       |
|     |                 |                  | 241.18764             | Fe II | $3d^6(^3H)4p$      | $3d^6(^3H)4d$            | [1]       |
| 215 | 241.392         | 64               | 241.3801              | Fe II | $3d^6(^1G_2)4p$    | $3d^6(^5D)6d$            | [1]       |
|     |                 |                  | 241.399345            | Fe II | $3d^6(^3F_2)4p$    | $3d^6(^3F_2)4d$          | [1]       |
| 216 | 241.428         | 42               | 241.4219              | Fe II | $3d^6(^3F_1)4s$    | $3d^5(^4G)4s4p(^3P^o)$   | [1]       |
|     |                 |                  | 241.4219              | Fe II | $3d^6(^3F_2)4p$    | $3d^6(^5D)5d$            | [1]       |
| 217 | 241.452         | 28               | 241.4515              | Fe II | $3d^6(^3F_2)4s$    | $3d^6(^3F_2)4p$          | [1]       |
|     |                 |                  | 241.45838             | Fe II | $3d^6(^3H)4p$      | $3d^6(^3H)4d$            | [1]       |
| 218 | 241.525         | 33               | 241.51943             | Fe II | $3d^6(^3P_1)4s$    | $3d^6(^5D)5p$            | [1]       |
|     |                 |                  | 241.52844             | Fe II | $3d^6(^3D)4p$      | $3d^6(^5D)6d$            | [1]       |
|     |                 |                  | 241.536098            | Fe II | $3d^6(^3G)4p$      | $3d^6(^3G)4d$            | [1]       |
| 219 | 241.61          | 37               | 241.59668             | Fe II | $3d^6(^5D)4p$      | $3d^6(^5D)4d$            | [1]       |
|     |                 |                  | 241.608005            | Fe II | $3d^6(^3P_2)4p$    | $3d^6(^3P_2)4d$          | [1]       |
|     |                 |                  | 241.61922             | Fe II | $3d^6(^3F_2)4p$    | $3d^6(^3F_2)4d$          | [1]       |
| 220 | 241.634         | 55               | 241.61922             | Fe II | $3d^6(^3F_2)4p$    | $3d^6(^3F_2)4d$          | [1]       |
|     |                 |                  | 241.644523            | Fe II | $3d^6(^5D)4p$      | $3d^6(^5D)4d$            | [1]       |
| 221 | 241.779         | 92               | 241.7644              | Fe II | $3d^6(^3F_2)4p$    | $3d^6(^3F_2)4d$          | [1]       |
|     |                 |                  | 241.782045            | Fe II | $3d^6(^3F_2)4s$    | $3d^6(^3F_2)4p$          | [1]       |
|     |                 |                  | 241.787036            | Fe II | $3d^6(^3H)4s$      | $3d^6(^3G)4p$            | [1]       |
| 222 | 241.84          | 43               | 241.8315              | Fe II | $3d^6(^3F_2)4p$    | $3d^6(^3F_2)4d$          | [1]       |
|     |                 |                  | 241.843659            | Fe II | $3d^6(^5D)4p$      | $3d^6(^5D)4d$            | [1]       |
| 223 | 242.009         | 171              | 241.998813            | Fe II | $3d^6(^5D)4p$      | $3d^6(^5D)4d$            | [1]       |
|     |                 |                  | 242.02298             | Fe II | $3d^6(^3D)4p$      | $3d^6(^5D)6d$            | [1]       |
| 224 | 242.263         | 78               | 242.25915             | Fe II | $3d^6(^3F_2)4p$    | $3d^6(^3F_2)4d$          | [1]       |
|     |                 |                  | 242.26506             | Fe II | $3d^6(^3F_2)4p$    | $3d^6(^3H)4d$            | [1]       |
|     |                 |                  | 242.268803            | Fe II | $3d^6(^3D)4s$      | $3d^6(^3D)4p$            | [1]       |
| 225 | 242.311         | 43               | 242.3105              | Fe I  | $3d^7(^4F)4s$      | $3d^6(^3F_2)4s4p(^3P^o)$ | [2]       |
|     |                 |                  | 242.321004            | Fe II | $3d^6(^3D)4s$      | $3d^6(^3D)4p$            | [1]       |
| 226 | 242.408         | 264              | 242.414529            | Fe II | $3d^6(^3F_2)4s$    | $3d^6(^3F_2)4p$          | [1]       |
|     |                 |                  | 242.42035             | Fe II | $3d^6(^3F_2)4p$    | $3d^6(^3F_2)4d$          | [1]       |
| 227 | 242.457         | 49               | 242.44409             | Fe II | $3d^6(^3F_2)4p$    | $3d^6(^3H)4d$            | [1]       |
|     |                 |                  | 242.4491              | Fe II | $3d^6(^3H)4s$      | $3d^6(^3F_2)4p$          | [1]       |

| No. | Wavelength (nm) | Intensity (a.u.) | Wavelength (nm), Ref. | Type  | Lower energy level | Higher energy level     | Reference |
|-----|-----------------|------------------|-----------------------|-------|--------------------|-------------------------|-----------|
|     |                 |                  | 242.459265            | Fe II | $3d^6(^3D)4s$      | $3d^6(^3D)4p$           | [1]       |
|     |                 |                  | 242.46509             | Fe II | $3d^6(^3F2)4s$     | $3d^6(^3F2)4p$          | [1]       |
| 228 | 242.565         | 48               | 242.563758            | Fe II | $3d^6(^3F2)4p$     | $3d^6(^3H)4d$           | [1]       |
|     |                 |                  | 242.568545            | Fe II | $3d^6(^3P2)4s$     | $3d^6(^3F2)4p$          | [1]       |
| 229 | 242.638         | 22               | 242.6315              | Fe I  | $3d^7(^4F)4s$      | $3d^7(^2D2)4p$          | [2]       |
|     |                 |                  | 242.644               | Fe II | $3d^6(^3G)4s$      | $3d^6(^3D)4p$           | [1]       |
| 230 | 242.723         | 28               | 242.71249             | Fe I  | $3d^7(^4F)4s$      | $3d^6(^3G)4s4p(^3P^o)$  | [2]       |
|     |                 |                  | 242.719946            | Fe II | $3d^6(^3F2)4p$     | $3d^6(^3F2)4d$          | [1]       |
|     |                 |                  | 242.72297             | Fe II | $3d^6(^3F2)4p$     | $3d^6(^3H)4d$           | [1]       |
|     |                 |                  | 242.728208            | Fe II | $3d^6(^5D)4p$      | $3d^6(^5D)4d$           | [1]       |
| 231 | 242.807         | 108              | 242.7977              | Fe II | $3d^6(^3F2)4p$     | $3d^6(^3H)4d$           | [1]       |
|     |                 |                  | 242.80766             | Fe II | $3d^7$             | $3d^6(^3H)4p$           | [1]       |
| 232 | 242.832         | 211              | 242.82918             | Fe II | $3d^6(^3D)4s$      | $3d^6(^3D)4p$           | [1]       |
|     |                 |                  | 242.836349            | Fe II | $3d^6(^3D)4s$      | $3d^6(^3D)4p$           | [1]       |
|     |                 |                  | 242.84564             | Fe II | $3d^6(^3H)4p$      | $3d^6(^3H)4d$           | [1]       |
| 233 | 243.001         | 157              | 242.986086            | Fe II | $3d^6(^3G)4p$      | $3d^6(^3H)4d$           | [1]       |
|     |                 |                  | 243.007802            | Fe II | $3d^6(^3F2)4s$     | $3d^6(^3F2)4p$          | [1]       |
| 234 | 243.098         | 32               | 243.08385             | Fe II | $3d^6(^1G1)4s$     | $3d^5(^4G)4s4p(^3P^o)$  | [1]       |
|     |                 |                  | 243.08823             | Fe II | $3d^6(^5D)4p$      | $3d^6(^5D)4d$           | [1]       |
|     |                 |                  | 243.09977             | Fe II | $3d^6(^3P1)4s$     | $3d^6(^3P1)4p$          | [1]       |
|     |                 |                  | 243.10246             | Fe I  | $3d^64s^2$         | $3d^6(^3P2)4s4p(^1P^o)$ | [2]       |
| 235 | 243.291         | 68               | 243.279               | Fe II | $3d^7$             | $3d^6(^1G2)4p$          | [1]       |
|     |                 |                  | 243.287288            | Fe II | $3d^6(^1)4s$       | $3d^6(^1)4p$            | [1]       |
|     |                 |                  | 243.3041              | Fe II | $3d^6(^5D)4p$      | $3d^6(^5D)4d$           | [1]       |
| 236 | 243.485         | 164              | 243.472903            | Fe II | $3d^6(^1)4s$       | $3d^6(^1)4p$            | [1]       |
|     |                 |                  | 243.48171             | Fe II | $3d^6(^5D)4p$      | $3d^6(^5D)4d$           | [1]       |
|     |                 |                  | 243.48769             | Fe II | $3d^6(^3H)4p$      | $3d^6(^3G)5s$           | [1]       |
|     |                 |                  | 243.49018             | Fe II | $3d^6(^1)4s$       | $3d^6(^1)4p$            | [1]       |
|     |                 |                  | 243.495154            | Fe II | $3d^6(^3F2)4s$     | $3d^6(^3F2)4p$          | [1]       |
|     |                 |                  | 243.499838            | Fe II | $3d^6(^5D)4p$      | $3d^6(^5D)4d$           | [1]       |
|     |                 |                  | 243.499838            | Fe II | $3d^6(^3P2)4s$     | $3d^6(^3F2)4p$          | [1]       |
| 237 | 243.666         | 45               | 243.65661             | Fe II | $3d^6(^1D2)4s$     | $3d^6(^1D2)4p$          | [1]       |
|     |                 |                  | 243.662163            | Fe II | $3d^6(^5D)4p$      | $3d^6(^5D)4d$           | [1]       |
|     |                 |                  | 243.67319             | Fe II | $3d^6(^3G)4p$      | $3d^6(^3H)4d$           | [1]       |
| 238 | 243.714         | 34               | 243.699621            | Fe II | $3d^6(^5D)4p$      | $3d^6(^5D)4d$           | [1]       |
|     |                 |                  | 243.699621            | Fe II | $3d^6(^1G1)4s$     | $3d^6(^1G1)4p$          | [1]       |

| No. | Wavelength (nm) | Intensity (a.u.) | Wavelength (nm), Ref. | Type  | Lower energy level | Higher energy level     | Reference |
|-----|-----------------|------------------|-----------------------|-------|--------------------|-------------------------|-----------|
|     |                 |                  | 243.7104              | Fe II | $3d^6(^5D)4p$      | $3d^6(^5D)4d$           | [1]       |
|     |                 |                  | 243.71623             | Fe II | $3d^6(^3G)4s$      | $3d^6(^3F2)4p$          | [1]       |
|     |                 |                  | 243.720356            | Fe II | $3d^6(^5D)4p$      | $3d^6(^5D)4d$           | [1]       |
|     |                 |                  | 243.7272              | Fe II | $3d^6(^3P2)4s$     | $3d^6(^3P2)4p$          | [1]       |
| 239 | 243.932         | 329              | 243.91704             | Fe I  | $3d^7(^4F)4s$      | $3d^6(^3G)4s4p(^3P^o)$  | [2]       |
|     |                 |                  | 243.930114            | Fe II | $3d^6(^3G)4s$      | $3d^6(^3G)4p$           | [1]       |
|     |                 |                  | 243.93556             | Fe I  | $3d^64s^2$         | $3d^64s(^4D)5p$         | [2]       |
|     |                 |                  | 243.9453              | Fe II | $3d^6(^5D)4p$      | $3d^6(^5D)5s$           | [1]       |
|     |                 |                  | 243.9453              | Fe II | $3d^54s^2$         | $3d^6(^4D)4s4p(^3P^o)$  | [1]       |
| 240 | 243.98          | 205              | 243.97448             | Fe I  | $3d^64s^2$         | $3d^6(^3H)4s4p(^1P^o)$  | [2]       |
|     |                 |                  | 243.98682             | Fe II | $3d^6(^5D)4p$      | $3d^6(^5D)4d$           | [1]       |
| 241 | 244.041         | 68               | 244.03317             | Fe I  | $3d^64s^2$         | $3d^64s(^4D)5p$         | [2]       |
|     |                 |                  | 244.042397            | Fe II | $3d^6(^3D)4s$      | $3d^6(^3D)4p$           | [1]       |
|     |                 |                  | 244.044328            | Fe II | $3d^6(^3G)4p$      | $3d^6(^3G)4d$           | [1]       |
| 242 | 244.258         | 136              | 244.25683             | Fe I  | $3d^64s^2$         | $3d^6(^3H)4s4p(^1P^o)$  | [2]       |
|     |                 |                  | 244.25877             | Fe II | $3d^6(^3F1)4s$     | $3d^6(^5D)5p$           | [1]       |
|     |                 |                  | 244.2644              | Fe I  | $3d^7(^4F)4s$      | $3d^6(^3G)4s4p(^3P^o)$  | [2]       |
|     |                 |                  | 244.26979             | Fe II | $3d^6(^5D)4p$      | $3d^6(^5D)4d$           | [1]       |
| 243 | 244.391         | 169              | 244.3834              | Fe II | $3d^6(^5D)4p$      | $3d^6(^5D)4d$           | [1]       |
|     |                 |                  | 244.38716             | Fe I  | $3d^7(^4F)4s$      | $3d^6(^3F2)4s4p(^3P^o)$ | [2]       |
|     |                 |                  | 244.39244             | Fe II | $3d^6(^3F1)4s$     | $3d^6(^3P1)5p$          | [1]       |
| 244 | 244.452         | 279              | 244.451511            | Fe II | $3d^6(^3P2)4s$     | $3d^6(^3P2)4p$          | [1]       |
|     |                 |                  | 244.45465             | Fe II | $3d^6(^5D)4p$      | $3d^6(^5D)4d$           | [1]       |
| 245 | 244.512         | 64               | 244.510618            | Fe II | $3d^6(^5D)4p$      | $3d^6(^5D)4d$           | [1]       |
|     |                 |                  | 244.511363            | Fe II | $3d^6(^3G)4p$      | $3d^6(^3F2)4d$          | [1]       |
|     |                 |                  | 244.52128             | Fe I  | $3d^7(^4F)4s$      | $3d^6(^3F2)4s4p(^3P^o)$ | [2]       |
| 246 | 244.621         | 98               | 244.611024            | Fe II | $3d^6(^3D)4s$      | $3d^6(^3D)4p$           | [1]       |
|     |                 |                  | 244.62202             | Fe II | $3d^6(^3G)4s$      | $3d^6(^3G)4p$           | [1]       |
|     |                 |                  | 244.632128            | Fe II | $3d^6(^3G)4p$      | $3d^6(^5D)5d$           | [1]       |
| 247 | 244.645         | 61               | 244.632128            | Fe II | $3d^6(^3G)4p$      | $3d^6(^5D)5d$           | [1]       |
|     |                 |                  | 244.640772            | Fe II | $3d^6(^5D)4p$      | $3d^6(^5D)4d$           | [1]       |
|     |                 |                  | 244.6453              | Fe II | $3d^6(^3F2)4p$     | $3d^6(^5D)5d$           | [1]       |
|     |                 |                  | 244.647114            | Fe II | $3d^6(^3H)4s$      | $3d^6(^3H)4p$           | [1]       |
|     |                 |                  | 244.6542              | Fe II | $3d^6(^3D)4p$      | $3d^6(^5D)7s$           | [1]       |
| 248 | 244.729         | 50               | 244.72039             | Fe II | $3d^6(^3D)4s$      | $3d^6(^3D)4p$           | [1]       |
|     |                 |                  | 244.732682            | Fe II | $3d^6(^3D)4s$      | $3d^6(^3D)4p$           | [1]       |

| No. | Wavelength (nm) | Intensity (a.u.) | Wavelength (nm), Ref. | Type  | Lower energy level | Higher energy level      | Reference |
|-----|-----------------|------------------|-----------------------|-------|--------------------|--------------------------|-----------|
|     |                 |                  | 244.741               | Fe II | $3d^6(^3F_2)4p$    | $3d^6(^5D)5d$            | [1]       |
| 249 | 244.778         | 108              | 244.769               | Fe II | $3d^6(^3G)4p$      | $3d^6(^6S)4p^2$          | [1]       |
|     |                 |                  | 244.77093             | Fe I  | $3d^64s^2$         | $3d^6(^5D)4s4p(^1P^o)$   | [2]       |
|     |                 |                  | 244.775491            | Fe II | $3d^6(^1I)4s$      | $3d^6(^1I)4p$            | [1]       |
| 250 | 245.007         | 48               | 244.996527            | Fe II | $3d^6(^3D)4s$      | $3d^6(^3D)4p$            | [1]       |
|     |                 |                  | 245.003185            | Fe II | $3d^6(^5D)4p$      | $3d^6(^5D)4d$            | [1]       |
|     |                 |                  | 245.01384             | Fe II | $3d^6(^5D)4p$      | $3d^6(^5D)4d$            | [1]       |
|     |                 |                  | 245.020514            | Fe II | $3d^6(^3D)4s$      | $3d^6(^3D)4p$            | [1]       |
| 251 | 245.044         | 120              | 245.04434             | Fe I  | $3d^7(^4F)4s$      | $3d^6(^3G)4s4p(^3P^o)$   | [2]       |
|     |                 |                  | 245.05288             | Fe II | $3d^6(^3F_2)4p$    | $3d^6(^3H)4d$            | [1]       |
|     |                 |                  | 245.05288             | Fe II | $3d^6(^3G)4p$      | $3d^6(^3F_2)4d$          | [1]       |
| 252 | 245.225         | 26               | 245.213896            | Fe II | $3d^6(^3G)4p$      | $3d^6(^5D)5d$            | [1]       |
|     |                 |                  | 245.21676             | Fe I  | $3d^7(^4F)4s$      | $3d^7(^4F)5p$            | [2]       |
|     |                 |                  | 245.21997             | Fe II | $3d^6(^5D)4p$      | $3d^6(^5D)4d$            | [1]       |
|     |                 |                  | 245.2256              | Fe II | $3d^6(^3F_2)4p$    | $3d^6(^3H)4d$            | [1]       |
|     |                 |                  | 245.2338              | Fe I  | $3d^7(^4F)4s$      | $3d^6(^3D)4s4p(^3P^o)$   | [2]       |
| 253 | 245.273         | 27               | 245.25918             | Fe I  | $3d^64s^2$         | $3d^6(^3H)4s4p(^1P^o)$   | [2]       |
|     |                 |                  | 245.27442             | Fe II | $3d^6(^3F_1)4s$    | $3d^6(^5D)5p$            | [1]       |
|     |                 |                  | 245.2757              | Fe II | $3d^6(^3F_2)4p$    | $3d^6(^3P_2)4d$          | [1]       |
|     |                 |                  | 245.28483             | Fe II | $3d^6(^3F_2)4p$    | $3d^6(^5D)5d$            | [1]       |
| 254 | 245.358         | 104              | 245.34758             | Fe I  | $3d^7(^4F)4s$      | $3d^6(^3G)4s4p(^3P^o)$   | [2]       |
|     |                 |                  | 245.35688             | Fe I  | $3d^64s^2$         | $3d^6(^3H)4s4p(^1P^o)$   | [2]       |
| 255 | 245.466         | 36               | 245.4561              | Fe II | $3d^6(^3D)4p$      | $3d^6(^6S)4p^2$          | [1]       |
|     |                 |                  | 245.457782            | Fe II | $3d^6(^1I)4s$      | $3d^6(^1I)4p$            | [1]       |
|     |                 |                  | 245.45871             | Fe II | $3d^6(^3H)4s$      | $3d^6(^3F_2)4p$          | [1]       |
| 256 | 245.72          | 62               | 245.710162            | Fe II | $3d^6(^3P_1)4s$    | $3d^6(^5D)5p$            | [1]       |
|     |                 |                  | 245.7187              | Fe II | $3d^6(^5D)4p$      | $3d^6(^5D)4d$            | [1]       |
|     |                 |                  | 245.7231              | Fe II | $3d^6(^3P_2)4p$    | $3d^6(^3F_2)4d$          | [1]       |
|     |                 |                  | 245.733958            | Fe II | $3d^6(^3H)4p$      | $3d^6(^3H)4d$            | [1]       |
| 257 | 245.768         | 1460             | 245.75505             | Fe II | $3d^6(^3D)4s$      | $3d^6(^3D)4p$            | [1]       |
|     |                 |                  | 245.757918            | Fe II | $3d^6(^5D)4p$      | $3d^6(^5D)4d$            | [1]       |
|     |                 |                  | 245.7589              | Fe I  | $3d^64s^2$         | $3d^6(^3F_2)4s4p(^1P^o)$ | [2]       |
|     |                 |                  | 245.75966             | Fe I  | $3d^7(^4F)4s$      | $3d^6(^3G)4s4p(^3P^o)$   | [2]       |
|     |                 |                  | 245.7791              | Fe II | $3d^6(^3D)4s$      | $3d^6(^3D)4p$            | [1]       |
| 258 | 245.889         | 252              | 245.878354            | Fe II | $3d^6(^3G)4s$      | $3d^6(^3G)4p$            | [1]       |
|     |                 |                  | 245.897276            | Fe II | $3d^6(^3D)4s$      | $3d^6(^3D)4p$            | [1]       |

| No. | Wavelength (nm) | Intensity (a.u.) | Wavelength (nm), Ref. | Type  | Lower energy level | Higher energy level    | Reference |
|-----|-----------------|------------------|-----------------------|-------|--------------------|------------------------|-----------|
|     |                 |                  | 245.897276            | Fe II | $3d^6(^3H)4p$      | $3d^6(^3H)4d$          | [1]       |
| 259 | 246.01          | 42               | 246.00197             | Fe II | $3d^6(^3F1)4s$     | $3d^6(^5D)5p$          | [1]       |
|     |                 |                  | 246.0075              | Fe I  | $3d^7(^4F)4s$      | $3d^7(^2H)4p$          | [2]       |
|     |                 |                  | 246.01543             | Fe II | $3d^6(^5D)4p$      | $3d^6(^5D)4d$          | [1]       |
| 260 | 246.046         | 100              | 246.044008            | Fe II | $3d^6(^5D)4p$      | $3d^6(^5D)4d$          | [1]       |
|     |                 |                  | 246.04798             | Fe II | $3d^6(^3F2)4p$     | $3d^6(^3F2)4d$         | [1]       |
|     |                 |                  | 246.04955             | Fe II | $3d^6(^3F2)4p$     | $3d^6(^3H)4d$          | [1]       |
|     |                 |                  | 246.05116             | Fe II | $3d^6(^3G)4p$      | $3d^6(^1I)5s$          | [1]       |
| 261 | 246.227         | 243              | 246.21808             | Fe I  | $3d^64s^2$         | $3d^6(^5D)4s4p(^1P^o)$ | [2]       |
|     |                 |                  | 246.231828            | Fe II | $3d^6(^5D)4p$      | $3d^6(^5D)4d$          | [1]       |
| 262 | 246.276         | 5382             | 246.26471             | Fe I  | $3d^64s^2$         | $3d^6(^5D)4s4p(^1P^o)$ | [2]       |
|     |                 |                  | 246.27474             | Fe II | $3d^6(^3F1)4s$     | $3d^6(^5D)5p$          | [1]       |
| 263 | 246.336         | 83               | 246.326               | Fe II | $3d^6(^3D)4p$      | $3d^6(^5D)7s$          | [1]       |
|     |                 |                  | 246.328118            | Fe II | $3d^6(^3G)4s$      | $3d^6(^3G)4p$          | [1]       |
|     |                 |                  | 246.33965             | Fe I  | $3d^7(^4P)4s$      | $3d^64s(^4D)5p$        | [2]       |
|     |                 |                  | 246.34923             | Fe II | $3d^6(^5D)4p$      | $3d^6(^5D)5s$          | [1]       |
| 264 | 246.384         | 64               | 246.3717              | Fe II | $3d^6(^3G)4p$      | $3d^6(^3G)4d$          | [1]       |
|     |                 |                  | 246.37303             | Fe I  | $3d^7(^4F)4s$      | $3d^7(^4P)4p$          | [2]       |
|     |                 |                  | 246.39027             | Fe II | $3d^6(^5D)4p$      | $3d^6(^5D)4d$          | [1]       |
| 265 | 246.408         | 92               | 246.400952            | Fe II | $3d^6(^3G)4s$      | $3d^6(^3G)4p$          | [1]       |
|     |                 |                  | 246.42213             | Fe II | $3d^6(^3F2)4p$     | $3d^6(^3F2)4d$         | [1]       |
| 266 | 246.517         | 911              | 246.51491             | Fe I  | $3d^7(^4F)4s$      | $3d^6(^3G)4s4p(^3P^o)$ | [2]       |
|     |                 |                  | 246.519994            | Fe II | $3d^6(^3P2)4s$     | $3d^6(^3P2)4p$         | [1]       |
| 267 | 246.602         | 91               | 246.587712            | Fe II | $3d^6(^3H)4p$      | $3d^6(^3F2)4d$         | [1]       |
|     |                 |                  | 246.591333            | Fe II | $3d^6(^3G)4s$      | $3d^6(^3G)4p$          | [1]       |
| 268 | 246.686         | 223              | 246.676678            | Fe II | $3d^6(^1D2)4s$     | $3d^6(^1D2)4p$         | [1]       |
|     |                 |                  | 246.681913            | Fe II | $3d^6(^3F2)4s$     | $3d^6(^3F2)4p$         | [1]       |
|     |                 |                  | 246.6897              | Fe I  | $3d^7(^4F)4s$      | $3d^7(^2G)4p$          | [2]       |
|     |                 |                  | 246.69849             | Fe II | $3d^6(^3G)4p$      | $3d^6(^3F2)4d$         | [1]       |
| 269 | 246.783         | 83               | 246.77334             | Fe I  | $3d^7(^4F)4s$      | $3d^6(^3G)4s4p(^3P^o)$ | [2]       |
|     |                 |                  | 246.7743              | Fe II | $3d^6(^5D)4p$      | $3d^6(^5D)4d$          | [1]       |
| 270 | 246.819         | 46               | 246.81926             | Fe II | $3d^6(^1G2)4s$     | $3d^6(^1I)4p$          | [1]       |
|     |                 |                  | 246.82567             | Fe II | $3d^6(^3P2)4s$     | $3d^6(^3P2)4p$         | [1]       |
|     |                 |                  | 246.829592            | Fe I  |                    |                        | [2]       |
|     |                 |                  | 246.829592            | Fe II | $3d^6(^3H)4s$      | $3d^6(^3H)4p$          | [1]       |
| 271 | 246.891         | 693              | 246.88797             | Fe I  | $3d^7(^4F)4s$      | $3d^6(^3G)4s4p(^3P^o)$ | [2]       |

| No. | Wavelength (nm) | Intensity (a.u.) | Wavelength (nm), Ref. | Type  | Lower energy level         | Higher energy level          | Reference |
|-----|-----------------|------------------|-----------------------|-------|----------------------------|------------------------------|-----------|
|     |                 |                  | 246.9008              | Fe I  | $3d^7(^4F)4s$              | $3d^6(^3G)4s4p(^3P^\circ)$   | [2]       |
|     |                 |                  | 246.9024              | Fe II | $3d^54s^2$                 | $3d^5(^4D)4s4p(^3P^\circ)$   | [1]       |
| 272 | 246.964         | 84               | 246.951439            | Fe II | $3d^6(^3D)4s$              | $3d^6(^3D)4p$                | [1]       |
|     |                 |                  | 246.96677             | Fe I  | $3d^64s^2$                 | $3d^6(^3P_2)4s4p(^3P^\circ)$ | [2]       |
|     |                 |                  | 246.97152             | Fe II | $3d^6(^5D)4p$              | $3d^6(^5D)4d$                | [1]       |
|     |                 |                  | 246.9789              | Fe II | $3d^6(^1G_2)4p$            | $3d^6(^5D)7s$                | [1]       |
| 273 | 247.036         | 160              | 247.040878            | Fe II | $3d^6(^3G)4s$              | $3d^6(^3G)4p$                | [1]       |
|     |                 |                  | 247.0495              | Fe II | $3d^6(^3G)4p$              | $3d^6(^3H)4d$                | [1]       |
|     |                 |                  | 247.0495              | Fe II | $3d^6(^1G_2)4p$            | $3d^6(^5D)6d$                | [1]       |
| 274 | 247.072         | 172              | 247.066913            | Fe II | $3d^6(^3F_2)4s$            | $3d^6(^3F_2)4p$              | [1]       |
|     |                 |                  | 247.07649             | Fe II | $3d^6(^3P_2)4s$            | $3d^6(^3P_2)4p$              | [1]       |
|     |                 |                  | 247.08462             | Fe II | $3d^6(^3H)4s$              | $3d^5(^6S)4s4p(^3P^\circ)$   | [1]       |
| 275 | 247.241         | 952              | 247.2332              | Fe I  | $3d^7(^4F)4s$              | $3d^5(^6S)4s^24p$            | [2]       |
|     |                 |                  | 247.2341              | Fe I  | $3d^7(^4F)4s$              | $3d^6(^3F_2)4s4p(^3P^\circ)$ | [2]       |
|     |                 |                  | 247.2341              | Fe I  | $3d^7(^4F)4s$              | $3d^6(^3G)4s4p(^3P^\circ)$   | [2]       |
|     |                 |                  | 247.242806            | Fe II | $3d^6(^3F_2)4s$            | $3d^6(^3F_2)4p$              | [1]       |
|     |                 |                  | 247.25325             | Fe II | $3d^6(^3F_2)4p$            | $3d^6(^5D)5d$                | [1]       |
| 276 | 247.302         | 7115             | 247.28711             | Fe I  | $3d^64s^2$                 | $3d^6(^5D)4s4p(^1P^\circ)$   | [2]       |
|     |                 |                  | 247.28947             | Fe I  | $3d^64s^2$                 | $3d^6(^5D)4s4p(^1P^\circ)$   | [2]       |
|     |                 |                  | 247.303086            | Fe II | $3d^6(^5D)4p$              | $3d^6(^5D)4d$                | [1]       |
|     |                 |                  | 247.31566             | Fe I  | $3d^64s^2$                 | $3d^5(^6S)4s^24p$            | [2]       |
| 277 | 247.495         | 564              | 247.48142             | Fe I  | $3d^7(^4F)4s$              | $3d^6(^3G)4s4p(^3P^\circ)$   | [2]       |
|     |                 |                  | 247.4943              | Fe I  | $3d^7(^4F)4s$              | $3d^6(^3G)4s4p(^3P^\circ)$   | [2]       |
|     |                 |                  | 247.5068              | Fe II | $3d^6(^3G)4p$              | $3d^6(^3G)4d$                | [1]       |
| 278 | 247.567         | 48               | 247.554125            | Fe II | $3d^6(^5D)4p$              | $3d^6(^5D)4d$                | [1]       |
|     |                 |                  | 247.57619             | Fe I  | $3d^64s^2$                 | $3d^64s(^4D)5p$              | [2]       |
|     |                 |                  | 247.5779              | Fe II | $3d^6(^3F_2)4p$            | $3d^6(^5D)5d$                | [1]       |
| 279 | 247.652         | 56               | 247.63929             | Fe II | $3d^6(^5D)4p$              | $3d^6(^5D)4d$                | [1]       |
|     |                 |                  | 247.64717             | Fe I  | $3d^6(^5D)4s4p(^3P^\circ)$ | $3d^64s(^6D_{5/2})6d$        | [2]       |
|     |                 |                  | 247.66565             | Fe I  | $3d^7(^4F)4s$              | $3d^6(^3G)4s4p(^3P^\circ)$   | [2]       |
| 280 | 247.676         | 76               | 247.66565             | Fe I  | $3d^7(^4F)4s$              | $3d^6(^3G)4s4p(^3P^\circ)$   | [2]       |
|     |                 |                  | 247.66822             | Fe II | $3d^6(^5D)4d$              | $3d^6(^3F_3)4f$              | [1]       |
|     |                 |                  | 247.68654             | Fe I  | $3d^7(^4F)4s$              | $3d^7(^4P)4p$                | [2]       |
| 281 | 247.833         | 46               | 247.82107             | Fe II | $3d^6(^3P_2)4s$            | $3d^6(^3F_2)4p$              | [1]       |
|     |                 |                  | 247.82109             | Fe I  | $3d^64s^2$                 | $3d^7(^4F_{3/2})4f$          | [2]       |
|     |                 |                  | 247.84503             | Fe II | $3d^6(^3H)4s$              | $3d^6(^3H)4p$                | [1]       |



| No. | Wavelength (nm) | Intensity (a.u.) | Wavelength (nm), Ref. | Type  | Lower energy level     | Higher energy level     | Reference |
|-----|-----------------|------------------|-----------------------|-------|------------------------|-------------------------|-----------|
| 282 | 247.989         | 5202             | 247.97762             | Fe I  | $3d^6 4s^2$            | $3d^6(^5D)4s4p(^1P^o)$  | [2]       |
|     |                 |                  | 247.98518             | Fe II | $3d^6(^3P2)4p$         | $3d^6(^3P2)4d$          | [1]       |
| 283 | 248.11          | 37               | 248.095138            | Fe II | $3d^6(^3G)4p$          | $3d^6(^3G)4d$           | [1]       |
|     |                 |                  | 248.10493             | Fe II | $3d^6(^3H)4s$          | $3d^6(^3G)4p$           | [1]       |
|     |                 |                  | 248.1146              | Fe II | $3d^6(^3H)4p$          | $3d^6(^3G)5s$           | [1]       |
|     |                 |                  | 248.1146              | Fe II | $3d^6(^5D)4d$          | $3d^6(^3H_5)4f$         | [1]       |
|     |                 |                  | 248.1203              | Fe II | $3d^6(^3F2)4p$         | $3d^6(^3H)4d$           | [1]       |
|     |                 |                  | 248.1203              | Fe II | $3d^6(^3P2)4s$         | $3d^6(^3G)4p$           | [1]       |
| 284 | 248.219         | 123              | 248.211698            | Fe II | $3d^6(^3H)4s$          | $3d^6(^3H)4p$           | [1]       |
|     |                 |                  | 248.22193             | Fe II | $3d^6(^3G)4p$          | $3d^6(^5D)5d$           | [1]       |
|     |                 |                  | 248.23258             | Fe II | $3d^6(^1D2)4s$         | $3d^6(^1D2)4p$          | [1]       |
| 285 | 248.339         | 59679            | 248.32707             | Fe I  | $3d^6 4s^2$            | $3d^6(^5D)4s4p(^1P^o)$  | [2]       |
|     |                 |                  | 248.337123            | Fe II | $3d^6(^3G)4p$          | $3d^6(^3G)4d$           | [1]       |
|     |                 |                  | 248.35332             | Fe I  | $3d^7(^4F)4s$          | $3d^6(^3G)4s4p(^3P^o)$  | [2]       |
| 286 | 248.424         | 3054             | 248.41875             | Fe I  | $3d^6 4s^2$            | $3d^6(^5D)4s4p(^1P^o)$  | [2]       |
|     |                 |                  | 248.4207              | Fe II | $3d^7$                 | $3d^6(^5D)4p$           | [1]       |
|     |                 |                  | 248.424431            | Fe II | $3d^6(^3H)4s$          | $3d^6(^3G)4p$           | [1]       |
| 287 | 248.532         | 35               | 248.52367             | Fe II | $3d^6(^3F2)4p$         | $3d^6(^3H)4d$           | [1]       |
|     |                 |                  | 248.5316              | Fe II | $3d^6(^3D)4p$          | $3d^6(^5D)7s$           | [1]       |
|     |                 |                  | 248.5443              | Fe I  | $3d^6 4s^2$            | $3d^6(^3H)4s4p(^1P^o)$  | [2]       |
| 288 | 248.713         | 201              | 248.70658             | Fe I  | $3d^7(^4F)4s$          | $3d^6(^3G)4s4p(^3P^o)$  | [2]       |
|     |                 |                  | 248.71068             | Fe II | $3d^6(^3F2)4p$         | $3d^6(^3H)4d$           | [1]       |
|     |                 |                  | 248.7243              | Fe I  | $3d^7(^4P)4s$          | $3d^6 4s(^6D_{1/2})4f$  | [2]       |
| 289 | 248.749         | 148              | 248.73697             | Fe I  | $3d^6 4s^2$            | $3d^6(^3P2)4s4p(^3P^o)$ | [2]       |
|     |                 |                  | 248.74148             | Fe I  | $3d^6(^5D)4s4p(^3P^o)$ | $3d^6 4s(^6D_{7/2})6d$  | [2]       |
|     |                 |                  | 248.7534              | Fe II | $3d^6(^3F2)4p$         | $3d^6(^3H)4d$           | [1]       |
| 290 | 248.822         | 35364            | 248.81423             | Fe I  | $3d^6 4s^2$            | $3d^6(^5D)4s4p(^1P^o)$  | [2]       |
|     |                 |                  | 248.81601             | Fe I  | $3d^7(^4F)4s$          | $3d^6(^3H)4s4p(^3P^o)$  | [2]       |
|     |                 |                  | 248.83212             | Fe II | $3d^6(^3F1)4s$         | $3d^6(^3F1)4p$          | [1]       |
|     |                 |                  | 248.8354              | Fe II | $3d^6(^3F1)4s$         | $3d^6(^3F1)4p$          | [1]       |
| 291 | 248.906         | 101              | 248.89443             | Fe I  | $3d^6 4s^2$            | $3d^6(^3F2)4s4p(^1P^o)$ | [2]       |
|     |                 |                  | 248.90746             | Fe I  | $3d^6(^5D)4s4p(^3P^o)$ | $3d^6 4s(^6D_{5/2})6d$  | [2]       |
|     |                 |                  | 248.90746             | Fe I  | $3d^6(^5D)4s4p(^3P^o)$ | $3d^6 4s(^6D_{3/2})6d$  | [2]       |
|     |                 |                  | 248.91103             | Fe II | $3d^6(^3P2)4s$         | $3d^6(^6S)4s4p(^3P^o)$  | [1]       |
|     |                 |                  | 248.9179              | Fe II | $3d^6(^3F2)4p$         | $3d^6(^3F2)4d$          | [1]       |

| No. | Wavelength (nm) | Intensity (a.u.) | Wavelength (nm), Ref. | Type  | Lower energy level         | Higher energy level          | Reference |
|-----|-----------------|------------------|-----------------------|-------|----------------------------|------------------------------|-----------|
|     |                 |                  | 248.9179              | Fe II | $3d^6(^5D)4d$              | $3d^6(^3H_6)4f$              | [1]       |
| 292 | 248.991         | 4194             | 248.982955            | Fe II | $3d^6(^3G)4s$              | $3d^6(^3G)4p$                | [1]       |
|     |                 |                  | 248.99131             | Fe I  | $3d^7(^4F)4s$              | $3d^7(^4P)4p$                | [2]       |
| 293 | 249.075         | 25159            | 249.06442             | Fe I  | $3d^64s^2$                 | $3d^6(^5D)4s4p(^1P^\circ)$   | [2]       |
|     |                 |                  | 249.0706              | Fe II | $3d^6(^1G_2)4s$            | $3d^6(^1I)4p$                | [4]       |
|     |                 |                  | 249.07082             | Fe I  | $3d^7(^4F)4s$              | $3d^6(^3G)4s4p(^3P^\circ)$   | [2]       |
|     |                 |                  | 249.0728              | Fe II | $3d^6(^5D)4d$              | $3d^6(^3H_6)4f$              | [1]       |
|     |                 |                  | 249.08299             | Fe I  | $3d^7(^4F)4s$              | $3d^5(^6S)4s^24p$            | [2]       |
|     |                 |                  | 249.083               | Fe II | $3d^6(^3G)4s$              | $3d^6(^3G)4p$                | [1]       |
|     |                 |                  | 249.085813            | Fe II | $3d^6(^3F_2)4s$            | $3d^6(^3F_2)4p$              | [1]       |
| 294 | 249.123         | 10916            | 249.11548             | Fe I  | $3d^64s^2$                 | $3d^6(^5D)4s4p(^1P^\circ)$   | [2]       |
|     |                 |                  | 249.12047             | Fe II | $3d^6(^3F_2)4p$            | $3d^6(^3P_2)4d$              | [1]       |
|     |                 |                  | 249.12342             | Fe II | $3d^6(^5D)4p$              | $3d^6(^5D)4d$                | [1]       |
|     |                 |                  | 249.1309              | Fe II | $3d^6(^3G)4s$              | $3d^6(^3H)4p$                | [1]       |
| 295 | 249.232         | 69               | 249.22307             | Fe I  | $3d^6(^5D)4s4p(^3P^\circ)$ | $3d^64s(^6D_{7/2})6d$        | [2]       |
|     |                 |                  | 249.234388            | Fe II | $3d^6(^3H)4s$              | $3d^6(^3G)4p$                | [1]       |
|     |                 |                  | 249.2455              | Fe I  | $3d^6(^5D)4s4p(^3P^\circ)$ | $3d^64s(^6D_{1/2})6d$        | [2]       |
| 296 | 249.328         | 1466             | 249.318431            | Fe II | $3d^6(^3H)4s$              | $3d^6(^3H)4p$                | [1]       |
|     |                 |                  | 249.322359            | Fe II | $3d^6(^3G)4s$              | $3d^6(^3G)4p$                | [1]       |
|     |                 |                  | 249.326342            | Fe II | $3d^6(^3H)4s$              | $3d^6(^3H)4p$                | [1]       |
|     |                 |                  | 249.32958             | Fe II | $3d^7$                     | $3d^6(^5D)4p$                | [1]       |
|     |                 |                  | 249.3379              | Fe II | $3d^6(^3F_2)4p$            | $3d^6(^3G)5s$                | [1]       |
| 297 | 249.401         | 71               | 249.387659            | Fe II | $3d^6(^5D)4p$              | $3d^6(^5D)4d$                | [1]       |
|     |                 |                  | 249.40008             | Fe I  | $3d^7(^4F)4s$              | $3d^6(^3G)4s4p(^3P^\circ)$   | [2]       |
|     |                 |                  | 249.40008             | Fe I  | $3d^7(^4F)4s$              | $3d^6(^3F_2)4s4p(^3P^\circ)$ | [2]       |
|     |                 |                  | 249.4116              | Fe II | $3d^6(^3H)4s$              | $3d^6(^3H)4p$                | [1]       |
| 298 | 249.437         | 79               | 249.42513             | Fe I  | $3d^7(^4F)4s$              | $3d^6(^3H)4s4p(^3P^\circ)$   | [2]       |
|     |                 |                  | 249.4304              | Fe II | $3d^6(^3F_2)4p$            | $3d^6(^5D)5d$                | [1]       |
|     |                 |                  | 249.45098             | Fe I  | $3d^7(^4F)4s$              | $3d^7(^2G)4p$                | [2]       |
| 299 | 249.593         | 109              | 249.586823            | Fe II | $3d^6(^3F_1)4s$            | $3d^6(^3F_1)4p$              | [1]       |
|     |                 |                  | 249.5872              | Fe I  | $3d^7(^4F)4s$              | $3d^6(^3H)4s4p(^3P^\circ)$   | [2]       |
| 300 | 249.666         | 713              | 249.65337             | Fe I  | $3d^7(^4F)4s$              | $3d^6(^3G)4s4p(^3P^\circ)$   | [2]       |
|     |                 |                  | 249.6659              | Fe II | $3d^6(^3F_2)4p$            | $3d^6(^5D)5d$                | [1]       |
|     |                 |                  | 249.6802              | Fe II | $3d^6(^3D)4p$              | $3d^6(^5D)6d$                | [1]       |
| 301 | 249.798         | 87               | 249.78528             | Fe I  | $3d^7(^4P)4s$              | $3d^64s(^6D)6p$              | [2]       |
|     |                 |                  | 249.7999              | Fe II | $3d^6(^3G)4p$              | $3d^54s(^7S)4d$              | [1]       |

| No. | Wavelength (nm) | Intensity (a.u.) | Wavelength (nm), Ref. | Type  | Lower energy level     | Higher energy level     | Reference |
|-----|-----------------|------------------|-----------------------|-------|------------------------|-------------------------|-----------|
|     |                 |                  | 249.808194            | Fe II | $3d^6(^3G)4p$          | $3d^6(^3G)4d$           | [1]       |
|     |                 |                  | 249.8122              | Fe I  | $3d^7(^4P)4s$          | $3d^64s(^6D_{1/2})4f$   | [2]       |
| 302 | 249.835         | 50               | 249.82054             | Fe I  | $3d^64s^2$             | $3d^64s(^4D)5p$         | [2]       |
|     |                 |                  | 249.83416             | Fe I  | $3d^7(^4P)4s$          | $3d^64s(^6D)6p$         | [2]       |
|     |                 |                  | 249.83603             | Fe II | $3d^6(^3H)4s$          | $3d^6(^3P2)4p$          | [1]       |
| 303 | 249.895         | 365              | 249.88182             | Fe I  | $3d^64s^2$             | $3d^6(^3P2)4s4p(^3P^o)$ | [2]       |
|     |                 |                  | 249.88737             | Fe I  | $3d^64s^2$             | $3d^5(^6S)4s^24p$       | [2]       |
|     |                 |                  | 249.889721            | Fe II | $3d^6(^3H)4s$          | $3d^6(^3H)4p$           | [1]       |
|     |                 |                  | 249.896787            | Fe II | $3d^6(^5D)4p$          | $3d^6(^5D)4d$           | [1]       |
|     |                 |                  | 249.90563             | Fe II | $3d^6(^3D)4s$          | $3d^6(^1S2)4p$          | [1]       |
| 304 | 250.124         | 5000             | 250.11318             | Fe I  | $3d^64s^2$             | $3d^6(^5D)4s4p(^1P^o)$  | [2]       |
|     |                 |                  | 250.1241              | Fe II | $3d^6(^3H)4p$          | $3d^6(^3F2)4d$          | [1]       |
|     |                 |                  | 250.12994             | Fe II | $3d^54s^2$             | $3d^6(^5D_3)5f$         | [1]       |
|     |                 |                  | 250.13504             | Fe II | $3d^6(^5D)4p$          | $3d^6(^5D)4d$           | [1]       |
| 305 | 250.208         | 70               | 250.1951              | Fe II | $3d^6(^5D)4p$          | $3d^6(^5D)4d$           | [1]       |
|     |                 |                  | 250.2015              | Fe II | $3d^6(^3F2)4p$         | $3d^6(^3H)4d$           | [1]       |
|     |                 |                  | 250.20439             | Fe II | $3d^6(^3F2)4p$         | $3d^6(^3H)4d$           | [1]       |
|     |                 |                  | 250.2225              | Fe I  | $3d^64s^2$             | $3d^64s(^4D)5p$         | [2]       |
| 306 | 250.256         | 128              | 250.24905             | Fe I  | $3d^64s^2$             | $3d^6(^3P2)4s4p(^1P^o)$ | [2]       |
|     |                 |                  | 250.2511              | Fe II | $3d^6(^3H)4p$          | $3d^6(^5D)6s$           | [1]       |
| 307 | 250.341         | 78               | 250.332617            | Fe II | $3d^6(^3G)4s$          | $3d^6(^3H)4p$           | [1]       |
|     |                 |                  | 250.34089             | Fe II | $3d^6(^3F2)4p$         | $3d^6(^3H)4d$           | [1]       |
|     |                 |                  | 250.34911             | Fe II | $3d^6(^1G2)4p$         | $3d^6(^5D)7s$           | [1]       |
|     |                 |                  | 250.34915             | Fe I  | $3d^64s^2$             | $3d^6(^3F2)4s4p(^1P^o)$ | [2]       |
|     |                 |                  | 250.35386             | Fe II | $3d^6(^5D)4p$          | $3d^6(^5D)4d$           | [1]       |
|     |                 |                  | 250.3555              | Fe I  | $3d^6(^5D)4s4p(^3P^o)$ | $3d^64s(^6D_{5/2})6d$   | [2]       |
| 308 | 250.401         | 112              | 250.387419            | Fe II | $3d^6(^3G)4s$          | $3d^6(^3G)4p$           | [1]       |
|     |                 |                  | 250.40619             | Fe II | $3d^6(^3P2)4p$         | $3d^6(^5D)5d$           | [1]       |
|     |                 |                  | 250.4102              | Fe I  | $3d^64s^2$             | $3d^6(^3F2)4s4p(^1P^o)$ | [2]       |
| 309 | 250.449         | 79               | 250.4541              | Fe I  | $3d^7(^4P)4s$          | $3d^64s(^6D_{3/2})4f$   | [2]       |
|     |                 |                  | 250.4542              | Fe II | $3d^54s^2$             | $3d^5(^4P)4s4p(^3P^o)$  | [1]       |
|     |                 |                  | 250.4627              | Fe I  | $3d^7(^4P)4s$          | $3d^6(^3D)4s4p(^3P^o)$  | [2]       |
| 310 | 250.558         | 74               | 250.54435             | Fe I  | $3d^6(^5D)4s4p(^3P^o)$ | $3d^64s(^6D_{7/2})6d$   | [2]       |
|     |                 |                  | 250.54824             | Fe II | $3d^6(^5D)4p$          | $3d^6(^5D)4d$           | [1]       |
|     |                 |                  | 250.56322             | Fe I  | $3d^64s^2$             | $3d^64s(^4D)5p$         | [2]       |
| 311 | 250.618         | 95               | 250.609325            | Fe II | $3d^6(^3G)4s$          | $3d^6(^3G)4p$           | [1]       |

| No. | Wavelength (nm) | Intensity (a.u.) | Wavelength (nm), Ref. | Type  | Lower energy level     | Higher energy level     | Reference |
|-----|-----------------|------------------|-----------------------|-------|------------------------|-------------------------|-----------|
|     |                 |                  | 250.6329              | Fe I  | $3d^7(^4P)4s$          | $3d^64s(^6D)6p$         | [2]       |
| 312 | 250.69          | 47               | 250.67649             | Fe II | $3d^6(^5D)4p$          | $3d^6(^5D)4d$           | [1]       |
|     |                 |                  | 250.679656            | Fe II | $3d^6(^3F1)4s$         | $3d^6(^3F1)4p$          | [1]       |
|     |                 |                  | 250.679656            | Fe II | $3d^6(^3F2)4s$         | $3d^6(^3P2)4p$          | [1]       |
|     |                 |                  | 250.6987              | Fe II | $3d^6(^3D)4s$          | $3d^6(^1S2)4p$          | [1]       |
|     |                 |                  | 250.70221             | Fe II | $3d^6(^3G)4s$          | $3d^6(^3G)4p$           | [1]       |
| 313 | 250.714         | 32               | 250.70221             | Fe II | $3d^6(^3G)4s$          | $3d^6(^3G)4p$           | [1]       |
| 314 | 250.847         | 58               | 250.8341              | Fe II | $3d^6(^3F1)4s$         | $3d^6(^5D)5p$           | [1]       |
|     |                 |                  | 250.8494              | Fe II | $3d^6(^3G)4p$          | $3d^6(^3G)4d$           | [1]       |
| 315 | 250.895         | 64               | 250.8814              | Fe II | $3d^6(^3H)4p$          | $3d^6(^5D)5d$           | [1]       |
|     |                 |                  | 250.8942              | Fe I  | $3d^7(^4P)4s$          | $3d^64s(^6D)6p$         | [2]       |
|     |                 |                  | 250.89442             | Fe II | $3d^6(^3F2)4p$         | $3d^6(^5D)6s$           | [1]       |
|     |                 |                  | 250.8945              | Fe I  | $3d^7(^4F)4s$          | $3d^6(^3G)4s4p(^3P^o)$  | [2]       |
| 316 | 250.943         | 32               | 250.937               | Fe II | $3d^6(^5D)4p$          | $3d^6(^5D)4d$           | [1]       |
|     |                 |                  | 250.9391              | Fe I  | $3d^7(^4P)4s$          | $3d^6(^3P2)4s4p(^1P^o)$ | [2]       |
|     |                 |                  | 250.94838             | Fe II | $3d^6(^3P1)4s$         | $3d^5(^4P)4s4p(^3P^o)$  | [1]       |
| 317 | 251.184         | 382              | 251.175999            | Fe II | $3d^6(^3H)4s$          | $3d^6(^3H)4p$           | [1]       |
|     |                 |                  | 251.19261             | Fe II | $3d^6(^3P1)4s$         | $3d^6(^3F1)4p$          | [1]       |
| 318 | 251.244         | 725              | 251.23423             | Fe II | $3d^6(^3H)4p$          | $3d^6(^3F2)4d$          | [1]       |
|     |                 |                  | 251.23647             | Fe I  | $3d^64s^2$             | $3d^5(^6S)4s^24p$       | [2]       |
|     |                 |                  | 251.237315            | Fe II | $3d^6(^5D)4p$          | $3d^6(^5D)4d$           | [1]       |
|     |                 |                  | 251.252212            | Fe II | $3d^6(^3D)4s$          | $3d^6(^3D)4p$           | [1]       |
| 319 | 251.353         | 53               | 251.34019             | Fe II | $3d^6(^3G)4s$          | $3d^6(^3G)4p$           | [1]       |
|     |                 |                  | 251.3472              | Fe II | $3d^6(^3F2)4p$         | $3d^6(^5D)5d$           | [1]       |
|     |                 |                  | 251.34997             | Fe I  | $3d^6(^5D)4s4p(^3P^o)$ | $3d^64s(^6D_{9/2})6d$   | [2]       |
| 320 | 251.449         | 119              | 251.438297            | Fe II | $3d^6(^3G)4s$          | $3d^6(^3G)4p$           | [1]       |
|     |                 |                  | 251.44071             | Fe II | $3d^6(^5D)4p$          | $3d^6(^5D)4d$           | [1]       |
|     |                 |                  | 251.45189             | Fe I  | $3d^6(^5D)4s4p(^3P^o)$ | $3d^64s(^6D_{7/2})6d$   | [2]       |
| 321 | 251.594         | 27               | 251.58536             | Fe I  | $3d^7(^4F)4s$          | $3d^7(^2P)4p$           | [2]       |
|     |                 |                  | 251.59055             | Fe II | $3d^6(^3P2)4p$         | $3d^6(^3P2)4d$          | [1]       |
|     |                 |                  | 251.59335             | Fe II | $3d^6(^5D)4p$          | $3d^6(^5D)5s$           | [1]       |
|     |                 |                  | 251.6057              | Fe II | $3d^6(^3F1)4s$         | $3d^6(^3F1)4p$          | [1]       |
|     |                 |                  | 251.6057              | Fe II | $3d^6(^3F2)4p$         | $3d^6(^3G)5s$           | [1]       |
| 322 | 251.666         | 43               | 251.65412             | Fe II | $3d^6(^1G1)4s$         | $3d^5(^4D)4s4p(^3P^o)$  | [1]       |
|     |                 |                  | 251.65707             | Fe I  | $3d^7(^4F)4s$          | $3d^7(^2G)4p$           | [2]       |
| 323 | 251.726         | 103              | 251.7127              | Fe I  | $3d^7(^4F)4s$          | $3d^6(^3F2)4s4p(^3P^o)$ | [2]       |

| No. | Wavelength (nm) | Intensity (a.u.) | Wavelength (nm), Ref. | Type  | Lower energy level           | Higher energy level            | Reference |
|-----|-----------------|------------------|-----------------------|-------|------------------------------|--------------------------------|-----------|
|     |                 |                  | 251.713092            | Fe II | $3d^6(^3P_2)4s$              | $3d^6(^3P_2)4p$                | [1]       |
|     |                 |                  | 251.72203             | Fe I  | $3d^7(^4F)4s$                | $3d^7(^2D_2)4p$                | [2]       |
|     |                 |                  | 251.72203             | Fe II | $3d^6(^3F_2)4p$              | $3d^6(^5D)5d$                  | [1]       |
|     |                 |                  | 251.72203             | Fe II | $3d^6(^3G)4s$                | $3d^6(^3G)4p$                  | [1]       |
|     |                 |                  | 251.73332             | Fe II | $3d^6(^5D)4p$                | $3d^6(^5D)5s$                  | [1]       |
| 324 | 251.774         | 305              | 251.76609             | Fe I  | $3d^7(^4F)4s$                | $3d^6(^3G)4s4p(^3P^{\circ})$   | [2]       |
|     |                 |                  | 251.7748              | Fe II | $3d^6(^3F_2)4p$              | $3d^6(^5D)6s$                  | [1]       |
|     |                 |                  | 251.7798              | Fe I  | $3d^7(^4P)4s$                | $3d^64s(^6D_{3/2})4f$          | [2]       |
| 325 | 251.919         | 131              | 251.90469             | Fe II | $3d^6(^3F_2)4s$              | $3d^6(^3F_2)4p$                | [1]       |
|     |                 |                  | 251.90731             | Fe II | $3d^6(^3F_2)4s$              | $3d^6(^3H)4p$                  | [1]       |
| 326 | 251.979         | 143              | 251.9848              | Fe I  | $3d^6(^5D)4s4p(^3P^{\circ})$ | $3d^64s(^6D_{9/2})6d$          | [2]       |
|     |                 |                  | 251.98485             | Fe II | $3d^6(^3P_2)4p$              | $3d^6(^3H)4d$                  | [1]       |
| 327 | 252.124         | 99               | 252.109143            | Fe II | $3d^6(^3F_2)4s$              | $3d^6(^3F_2)4p$                | [1]       |
|     |                 |                  | 252.1159              | Fe I  | $3d^7(^4F)4s$                | $3d^7(^2D_2)4p$                | [2]       |
|     |                 |                  | 252.12163             | Fe II | $3d^6(^3F_1)4s$              | $3d^6(^3F_1)4p$                | [1]       |
|     |                 |                  | 252.13318             | Fe II | $3d^6(^3F_2)4p$              | $3d^6(^3H)4d$                  | [1]       |
| 328 | 252.196         | 87               | 252.181511            | Fe II | $3d^6(^1G_2)4s$              | $3d^6(^1G_2)4p$                | [1]       |
|     |                 |                  | 252.19188             | Fe I  | $3d^7(^4F)4s$                | $3d^7(^4P)4p$                  | [2]       |
| 329 | 252.292         | 30197            | 252.28493             | Fe I  | $3d^64s^2$                   | $3d^6(^5D)4s4p(^1P^{\circ})$   | [2]       |
|     |                 |                  | 252.289161            | Fe II | $3d^6(^1G_2)4s$              | $3d^6(^1G_2)4p$                | [1]       |
| 330 | 252.437         | 1368             | 252.42923             | Fe I  | $3d^64s^2$                   | $3d^6(^5D)4s4p(^1P^{\circ})$   | [2]       |
|     |                 |                  | 252.4394              | Fe I  | $3d^6(^5D)4s4p(^3P^{\circ})$ | $3d^64s(^6D_{7/2})6d$          | [2]       |
| 331 | 252.521         | 152              | 252.51099             | Fe II | $3d^6(^1G_2)4s$              | $3d^6(^1G_2)4p$                | [1]       |
|     |                 |                  | 252.5111              | Fe I  | $3d^7(^4P)4s$                | $3d^64s(^6D)6p$                | [2]       |
|     |                 |                  | 252.53281             | Fe II | $3d^6(^3G)4p$                | $3d^6(^3G)4d$                  | [1]       |
| 332 | 252.545         | 565              | 252.53281             | Fe II | $3d^6(^3G)4p$                | $3d^6(^3G)4d$                  | [1]       |
|     |                 |                  | 252.538758            | Fe II | $3d^6(^3H)4s$                | $3d^6(^3H)4p$                  | [1]       |
|     |                 |                  | 252.54782             | Fe II | $3d^6(^3F_1)4s$              | $3d^6(^3F_1)4p$                | [1]       |
| 333 | 252.641         | 1811             | 252.629363            | Fe II | $3d^6(^3P_2)4s$              | $3d^6(^3P_2)4p$                | [1]       |
|     |                 |                  | 252.6529              | Fe II | $3d^6(^3F_2)4p$              | $3d^6(^3G)5s$                  | [1]       |
| 334 | 252.75          | 11984            | 252.74348             | Fe I  | $3d^64s^2$                   | $3d^6(^5D)4s4p(^1P^{\circ})$   | [2]       |
|     |                 |                  | 252.745493            | Fe II | $3d^6(^1G_2)4s$              | $3d^6(^1G_2)4p$                | [1]       |
| 335 | 252.93          | 3158             | 252.922808            | Fe II | $3d^6(^3H)4s$                | $3d^6(^3G)4p$                  | [1]       |
|     |                 |                  | 252.93075             | Fe I  | $3d^64s^2$                   | $3d^6(^3F_2)4s4p(^1P^{\circ})$ | [2]       |
|     |                 |                  | 252.9414              | Fe II | $3d^6(^3F_2)4p$              | $3d^6(^5D)5d$                  | [1]       |
| 336 | 252.966         | 1316             | 252.954515            | Fe II | $3d^6(^3F_2)4s$              | $3d^6(^3F_2)4p$                | [1]       |

| No. | Wavelength (nm) | Intensity (a.u.) | Wavelength (nm), Ref. | Type  | Lower energy level     | Higher energy level     | Reference |
|-----|-----------------|------------------|-----------------------|-------|------------------------|-------------------------|-----------|
|     |                 |                  | 252.955919            | Fe II | $3d^6(^3P2)4s$         | $3d^6(^3P2)4p$          | [1]       |
| 337 | 252.99          | 556              | 252.98352             | Fe I  | $3d^64s^2$             | $3d^6(^5D)4s4p(^1P^o)$  | [2]       |
|     |                 |                  | 252.99308             | Fe II | $3d^6(^1G2)4s$         | $3d^6(^1G2)4p$          | [1]       |
| 338 | 253.075         | 249              | 253.06915             | Fe I  | $3d^64s^2$             | $3d^6(^6S)4s^24p$       | [2]       |
|     |                 |                  | 253.0806              | Fe II | $3d^6(^5D)4d$          | $3d^6(^3P2)4f$          | [1]       |
|     |                 |                  | 253.0877              | Fe II | $3d^5(^6S)4s4p(^3P^o)$ | $3d^6(^3G)4d$           | [1]       |
| 339 | 253.195         | 31               | 253.187088            | Fe II | $3d^6(^3G)4p$          | $3d^6(^3G)4d$           | [1]       |
|     |                 |                  | 253.205               | Fe II | $3d^6(^5D)4p$          | $3d^6(^5D)4d$           | [1]       |
| 340 | 253.376         | 510              | 253.362708            | Fe II | $3d^6(^3H)4s$          | $3d^6(^3H)4p$           | [1]       |
|     |                 |                  | 253.3804              | Fe I  | $3d^64s^2$             | $3d^6(^3F2)4s4p(^1P^o)$ | [2]       |
| 341 | 253.448         | 214              | 253.43552             | Fe II | $3d^6(^3F2)4s$         | $3d^6(^3H)4p$           | [1]       |
|     |                 |                  | 253.441837            | Fe II | $3d^6(^3H)4s$          | $3d^6(^3H)4p$           | [1]       |
|     |                 |                  | 253.450335            | Fe II | $3d^6(^3H)4p$          | $3d^6(^3H)4d$           | [1]       |
| 342 | 253.508         | 50               | 253.5036              | Fe II | $3d^5(^6S)4s4p(^3P^o)$ | $3d^6(^3G)4d$           | [1]       |
|     |                 |                  | 253.5128              | Fe I  | $3d^7(^4F)4s$          | $3d^6(^3P2)4s4p(^3P^o)$ | [2]       |
| 343 | 253.688         | 693              | 253.6801              | Fe I  | $3d^7(^4F)4s$          | $3d^7(^4P)4p$           | [2]       |
|     |                 |                  | 253.680452            | Fe II | $3d^6(^3H)4s$          | $3d^6(^3H)4p$           | [1]       |
|     |                 |                  | 253.684496            | Fe II | $3d^6(^3H)4s$          | $3d^6(^3H)4p$           | [1]       |
|     |                 |                  | 253.69718             | Fe I  | $3d^7(^4F)4s$          | $3d^6(^5D)4s(^6D)5p$    | [2]       |
|     |                 |                  | 253.699               | Fe II | $3d^6(^3P2)4p$         | $3d^6(^3P2)5s$          | [1]       |
| 344 | 253.724         | 991              | 253.71036             | Fe II | $3d^6(^3G)4s$          | $3d^6(^3F2)4p$          | [1]       |
|     |                 |                  | 253.713               | Fe I  | $3d^6(^5D)4s4p(^3P^o)$ | $3d^64s(^4D)4d$         | [2]       |
|     |                 |                  | 253.713775            | Fe II | $3d^6(^5D)4p$          | $3d^6(^5D)5s$           | [1]       |
|     |                 |                  | 253.71745             | Fe I  | $3d^64s^2$             | $3d^6(^3H)4s4p(^1P^o)$  | [2]       |
|     |                 |                  | 253.737               | Fe II | $3d^7$                 | $3d^6(^5D)4p$           | [1]       |
| 345 | 253.833         | 53               | 253.820421            | Fe II | $3d^6(^1)4s$           | $3d^6(^1G2)4p$          | [1]       |
|     |                 |                  | 253.820421            | Fe II | $3d^6(^3H)4s$          | $3d^6(^3H)4p$           | [1]       |
|     |                 |                  | 253.8397              | Fe I  | $3d^7(^4P)4s$          | $3d^64s(^6D)6p$         | [2]       |
|     |                 |                  | 253.8398              | Fe II | $3d^6(^3F2)4s$         | $3d^6(^3H)4p$           | [1]       |
| 346 | 253.905         | 939              | 253.89092             | Fe II | $3d^6(^3H)4s$          | $3d^6(^3H)4p$           | [1]       |
|     |                 |                  | 253.899324            | Fe II | $3d^6(^3H)4s$          | $3d^6(^3H)4p$           | [1]       |
|     |                 |                  | 253.9103              | Fe II | $3d^54s^2$             | $3d^6(^3P2)4p$          | [1]       |
| 347 | 254.109         | 3885             | 254.0972              | Fe I  | $3d^64s^2$             | $3d^6(^5D)4s4p(^1P^o)$  | [2]       |
|     |                 |                  | 254.110071            | Fe II | $3d^6(^3F2)4s$         | $3d^6(^3F2)4p$          | [1]       |
| 348 | 254.218         | 706              | 254.21011             | Fe I  | $3d^64s^2$             | $3d^6(^3H)4s4p(^1P^o)$  | [2]       |
|     |                 |                  | 254.23084             | Fe II | $3d^6(^3F2)4p$         | $3d^6(^3G)5s$           | [1]       |

| No. | Wavelength (nm) | Intensity (a.u.) | Wavelength (nm), Ref. | Type  | Lower energy level           | Higher energy level           | Reference |
|-----|-----------------|------------------|-----------------------|-------|------------------------------|-------------------------------|-----------|
|     |                 |                  | 254.2314              | Fe I  | $3d^6 4s^2$                  | $3d^6 4s(^4D)5p$              | [2]       |
|     |                 |                  | 254.2316              | Fe II | $3d^7$                       | $3d^6(^5D)4p$                 | [5]       |
| 349 | 254.278         | 47               | 254.273581            | Fe II | $3d^6(^3P2)4s$               | $3d^6(^3P2)4p$                | [1]       |
|     |                 |                  | 254.27359             | Fe I  | $3d^6 4s^2$                  | $3d^7(^4F_{9/2})4f$           | [2]       |
| 350 | 254.35          | 204              | 254.33778             | Fe I  | $3d^6 4s^2$                  | $3d^6 4s(^4D)5p$              | [2]       |
|     |                 |                  | 254.337788            | Fe II | $3d^6(^3H)4s$                | $3d^6(^3H)4p$                 | [1]       |
|     |                 |                  | 254.3378              | Fe I  | $3d^6 4s^2$                  | $3d^7(^4F_{3/2})4f$           | [2]       |
|     |                 |                  | 254.343123            | Fe II | $3d^6(^3F2)4s$               | $3d^6(^3F2)4p$                | [1]       |
|     |                 |                  | 254.35792             | Fe II | $3d^6(^3G)4p$                | $3d^6(^3P2)4d$                | [1]       |
| 351 | 254.398         | 468              | 254.3896              | Fe I  | $3d^6 4s^2$                  | $3d^6(^3F2)4s4p(^1P^{\circ})$ | [2]       |
|     |                 |                  | 254.39224             | Fe I  | $3d^6 4s^2$                  | $3d^6(^3H)4s4p(^1P^{\circ})$  | [2]       |
| 352 | 254.482         | 319              | 254.470616            | Fe I  |                              |                               | [6]       |
|     |                 |                  | 254.4886              | Fe II | $3d^6(^5D)4p$                | $3d^6(^5D)4d$                 | [1]       |
| 353 | 254.53          | 124              | 254.521954            | Fe II | $3d^6(^3H)4s$                | $3d^6(^3H)4p$                 | [1]       |
|     |                 |                  | 254.53191             | Fe II | $3d^6(^3F2)4p$               | $3d^6(^3P2)4d$                | [1]       |
|     |                 |                  | 254.54416             | Fe II | $3d^6(^3F2)4s$               | $3d^6(^3G)4p$                 | [1]       |
| 354 | 254.603         | 4171             | 254.59783             | Fe I  | $3d^6 4s^2$                  | $3d^6(^5D)4s4p(^1P^{\circ})$  | [2]       |
|     |                 |                  | 254.61746             | Fe I  | $3d^7(^4P)4s$                | $3d^6 4s(^6D)6p$              | [2]       |
|     |                 |                  | 254.61746             | Fe I  | $3d^6 4s^2$                  | $3d^6(^3D)4s4p(^3P^{\circ})$  | [2]       |
| 355 | 254.687         | 175              | 254.6758              | Fe II | $3d^6(^1G2)4p$               | $3d^6(^5D)7s$                 | [1]       |
|     |                 |                  | 254.67979             | Fe II | $3d^6(^3G)4p$                | $3d^6(^3F2)4d$                | [1]       |
|     |                 |                  | 254.68674             | Fe I  | $3d^6 4s^2$                  | $3d^6(^3G)4s4p(^1P^{\circ})$  | [2]       |
|     |                 |                  | 254.6948              | Fe II | $3d^6(^3H)4p$                | $3d^6(^3H)4d$                 | [1]       |
| 356 | 254.819         | 28               | 254.80802             | Fe I  | $3d^6(^5D)4s4p(^3P^{\circ})$ |                               | [2]       |
|     |                 |                  | 254.81                | Fe I  | $3d^7(^4P)4s$                | $3d^6(^1G2)4s4p(^3P^{\circ})$ | [2]       |
|     |                 |                  | 254.81568             | Fe II | $3d^6(^3F2)4s$               | $3d^5(^6S)4s4p(^3P^{\circ})$  | [1]       |
|     |                 |                  | 254.832493            | Fe II | $3d^6(^3P2)4s$               | $3d^6(^3H)4p$                 | [1]       |
| 357 | 254.879         | 177              | 254.874389            | Fe II | $3d^6(^3P2)4s$               | $3d^6(^3P2)4p$                | [1]       |
|     |                 |                  | 254.8883              | Fe I  | $3d^6 4s^2$                  | $3d^6(^3F2)4s4p(^1P^{\circ})$ | [2]       |
|     |                 |                  | 254.892229            | Fe II | $3d^6(^3G)4p$                | $3d^6(^3F2)4d$                | [1]       |
|     |                 |                  | 254.892229            | Fe II | $3d^6(^1)4s$                 | $3d^6(^1G2)4p$                | [1]       |
| 358 | 254.915         | 135              | 254.908301            | Fe II | $3d^6(^3G)4s$                | $3d^6(^3G)4p$                 | [1]       |
|     |                 |                  | 254.9169              | Fe II | $3d^6(^3F2)4p$               | $3d^6(^3P2)4d$                | [1]       |
|     |                 |                  | 254.921               | Fe II | $3d^6(^3D)4p$                | $3d^6(^3D)4d$                 | [1]       |
|     |                 |                  | 254.9226              | Fe I  | $3d^7(^4P)4s$                | $3d^6 4s(^6D_{9/2})4f$        | [2]       |
| 359 | 254.975         | 5591             | 254.96132             | Fe I  | $3d^6 4s^2$                  | $3d^6(^5D)4s4p(^1P^{\circ})$  | [2]       |

| No. | Wavelength (nm) | Intensity (a.u.) | Wavelength (nm), Ref. | Type  | Lower energy level | Higher energy level           | Reference |
|-----|-----------------|------------------|-----------------------|-------|--------------------|-------------------------------|-----------|
|     |                 |                  | 254.96587             | Fe II | $3d^6(^3H)4p$      | $3d^6(^3H)4d$                 | [1]       |
|     |                 |                  | 254.97722             | Fe II | $3d^6(^3F2)4s$     | $3d^6(^3G)4p$                 | [1]       |
|     |                 |                  | 254.98745             | Fe II | $3d^6(^3G)4p$      | $3d^6(^3H)4d$                 | [1]       |
| 360 | 255.12          | 134              | 255.10932             | Fe I  | $3d^64s^2$         | $3d^6(^3P2)4s4p(^1P^{\circ})$ | [2]       |
|     |                 |                  | 255.120417            | Fe II | $3d^6(^1G2)4s$     | $3d^6(^3D)4p$                 | [1]       |
|     |                 |                  | 255.120417            | Fe II | $3d^6(^3G)4p$      | $3d^6(^3H)4d$                 | [1]       |
|     |                 |                  | 255.12229             | Fe II | $3d^6(^1G1)4s$     | $3d^6(^1G1)4p$                | [1]       |
|     |                 |                  | 255.12853             | Fe II | $3d^6(^1G2)4s$     | $3d^6(^3D)4p$                 | [1]       |
| 361 | 255.276         | 98               | 255.27682             | Fe I  | $3d^7(^4P)4s$      | $3d^64s(^6D)6p$               | [2]       |
|     |                 |                  | 255.28305             | Fe I  | $3d^7(^4F)4s$      | $3d^7(^4P)4p$                 | [2]       |
| 362 | 255.516         | 30               | 255.506716            | Fe II | $3d^6(^3F2)4s$     | $3d^6(^3F2)4p$                | [1]       |
|     |                 |                  | 255.5145              | Fe II | $3d^6(^1I)4p$      | $3d^6(^5D)7s$                 | [1]       |
| 363 | 255.697         | 77               | 255.68627             | Fe I  | $3d^7(^4F)4s$      | $3d^6(^3H)4s4p(^3P^{\circ})$  | [2]       |
|     |                 |                  | 255.7082              | Fe II | $3d^6(^3H)4s$      | $3d^6(^3H)4p$                 | [1]       |
| 364 | 255.793         | 85               | 255.7829              | Fe I  | $3d^64s^2$         | $3d^7(^4F_{9/2})4f$           | [2]       |
|     |                 |                  | 255.79785             | Fe I  | $3d^64s^2$         | $3d^7(^4F_{9/2})4f$           | [2]       |
| 365 | 255.853         | 27               | 255.8522              | Fe I  | $3d^64s^2$         | $3d^7(^4F_{3/2})4f$           | [2]       |
|     |                 |                  | 255.8579              | Fe I  | $3d^64s^2$         | $3d^7(^4F_{3/2})4f$           | [2]       |
| 366 | 256.033         | 128              | 256.028216            | Fe II | $3d^6(^3P2)4s$     | $3d^6(^3P2)4p$                | [1]       |
|     |                 |                  | 256.0373              | Fe II | $3d^6(^3D)4p$      | $3d^6(^5D)6d$                 | [1]       |
|     |                 |                  | 256.0402              | Fe II | $3d^6(^3G)4p$      | $3d^6(^3H)4d$                 | [1]       |
|     |                 |                  | 256.0455              | Fe II | $3d^6(^3H)4s$      | $3d^6(^3H)4p$                 | [1]       |
| 367 | 256.262         | 1654             | 256.253531            | Fe II | $3d^6(^5D)4s$      | $3d^6(^5D)4p$                 | [1]       |
|     |                 |                  | 256.26222             | Fe II | $3d^6(^3H)4s$      | $3d^6(^3H)4p$                 | [1]       |
| 368 | 256.358         | 531              | 256.347523            | Fe II | $3d^6(^5D)4s$      | $3d^6(^5D)4p$                 | [1]       |
|     |                 |                  | 256.3604              | Fe II | $3d^6(^3G)4p$      | $3d^6(^3F2)4d$                | [1]       |
| 369 | 256.634         | 32               | 256.62196             | Fe II | $3d^6(^1F)4s$      | $3d^6(^1F)4p$                 | [1]       |
|     |                 |                  | 256.64014             | Fe II | $3d^6(^1F)4s$      | $3d^6(^1F)4p$                 | [1]       |
| 370 | 256.694         | 104              | 256.691235            | Fe II | $3d^6(^5D)4s$      | $3d^6(^5D)4p$                 | [1]       |
|     |                 |                  | 256.7037              | Fe II | $3d^6(^3F2)4s$     | $3d^6(^5S)4s4p(^3P^{\circ})$  | [1]       |
| 371 | 256.85          | 53               | 256.8362              | Fe II | $3d^6(^3G)4p$      | $3d^6(^3F2)4d$                | [1]       |
|     |                 |                  | 256.8407              | Fe I  | $3d^64s^2$         | $3d^7(^4F_{9/2})4f$           | [2]       |
|     |                 |                  | 256.840969            | Fe II | $3d^6(^3P2)4s$     | $3d^6(^3P2)4p$                | [1]       |
| 372 | 256.911         | 38               | 256.89842             | Fe II | $3d^6(^3F2)4p$     | $3d^6(^5D)5d$                 | [1]       |
|     |                 |                  | 256.9029              | Fe I  | $3d^64s^2$         | $3d^7(^4F_{3/2})4f$           | [2]       |



| No. | Wavelength (nm) | Intensity (a.u.) | Wavelength (nm), Ref. | Type  | Lower energy level     | Higher energy level      | Reference |
|-----|-----------------|------------------|-----------------------|-------|------------------------|--------------------------|-----------|
|     |                 |                  | 256.9029              | Fe II | $3d^6(^3G)4p$          | $3d^6(^3F_2)4d$          | [1]       |
|     |                 |                  | 256.9089              | Fe I  | $3d^64s^2$             | $3d^7(^4F_{9/2})4f$      | [2]       |
| 373 | 256.983         | 30               | 256.97434             | Fe I  | $3d^7(^4F)4s$          | $3d^7(^4P)4p$            | [2]       |
|     |                 |                  | 256.97798             | Fe II | $3d^6(^1S_2)4s$        | $3d^6(^1S_2)4p$          | [1]       |
|     |                 |                  | 256.99519             | Fe II | $3d^6(^3G)4p$          | $3d^6(^3F_2)4d$          | [1]       |
| 374 | 257.091         | 88               | 257.084897            | Fe II | $3d^6(^3G)4s$          | $3d^6(^3G)4p$            | [1]       |
|     |                 |                  | 257.08794             | Fe II | $3d^6(^1G_2)4s$        | $3d^6(^3D)4p$            | [1]       |
| 375 | 257.307         | 29               | 257.296764            | Fe II | $3d^54s^2$             | $3d^5(^6S)4s4p(^3P^o)$   | [1]       |
|     |                 |                  | 257.3081              | Fe II | $3d^6(^3G)4p$          | $3d^6(^3F_2)4d$          | [1]       |
|     |                 |                  | 257.31216             | Fe II | $3d^5(^6S)4s4p(^1P^o)$ | $3d^54p^2$               | [1]       |
|     |                 |                  | 257.31826             | Fe II | $3d^6(^1G_2)4s$        | $3d^6(^3D)4p$            | [1]       |
|     |                 |                  | 257.321162            | Fe II | $3d^6(^3G)4s$          | $3d^6(^3F_2)4p$          | [1]       |
| 376 | 257.439         | 492              | 257.4307              | Fe II | $3d^6(^3G)4p$          | $3d^6(^5D)5d$            | [1]       |
|     |                 |                  | 257.436586            | Fe II | $3d^6(^3P_2)4s$        | $3d^6(^3P_2)4p$          | [1]       |
|     |                 |                  | 257.4467              | Fe II | $3d^6(^3D)4s$          | $3d^6(^3G)4p$            | [1]       |
| 377 | 257.679         | 491              | 257.669               | Fe I  | $3d^7(^4F)4s$          | $3d^6(^3F_2)4s4p(^3P^o)$ | [2]       |
|     |                 |                  | 257.686372            | Fe II | $3d^6(^1G_2)4s$        | $3d^6(^1G_2)4p$          | [1]       |
|     |                 |                  | 257.68741             | Fe II | $3d^6(^3G)4p$          | $3d^6(^3P_2)4d$          | [1]       |
| 378 | 257.799         | 213              | 257.792162            | Fe II | $3d^6(^5D)4s$          | $3d^6(^5D)4p$            | [1]       |
|     |                 |                  | 257.80032             | Fe I  | $3d^64s^2$             | $3d^64s(^4D)5p$          | [2]       |
|     |                 |                  | 257.80246             | Fe II | $3d^6(^3G)4p$          | $3d^6(^3F_2)4d$          | [1]       |
| 379 | 257.931         | 34               | 257.927               | Fe I  | $3d^7(^4F)4s$          | $3d^6(^3H)4s4p(^3P^o)$   | [2]       |
|     |                 |                  | 257.9272              | Fe I  | $3d^6(^5D)4s4p(^3P^o)$ | $3d^64s(^6D)7s$          | [2]       |
|     |                 |                  | 257.94121             | Fe II | $3d^6(^3H)4s$          | $3d^6(^3F_2)4p$          | [1]       |
|     |                 |                  | 257.94121             | Fe II | $3d^6(^3F_2)4s$        | $3d^6(^3G)4p$            | [1]       |
| 380 | 257.991         | 62               | 257.98436             | Fe II | $3d^6(^3G)4p$          | $3d^6(^5D)5d$            | [1]       |
|     |                 |                  | 257.98438             | Fe I  | $3d^7(^2G)4s$          | $3d^6(^3F_2)4s4p(^1P^o)$ | [2]       |
|     |                 |                  | 258.0011              | Fe II | $3d^54s^2$             | $3d^6(^3F_2)4p$          | [1]       |
| 381 | 258.083         | 207              | 258.0721              | Fe II | $3d^6(^1G_2)4s$        | $3d^6(^3D)4p$            | [1]       |
|     |                 |                  | 258.09507             | Fe I  | $3d^7(^4F)4s$          | $3d^7(^4P)4p$            | [2]       |
| 382 | 258.457         | 2008             | 258.45359             | Fe I  | $3d^7(^4F)4s$          | $3d^6(^3F_2)4s4p(^3P^o)$ | [2]       |
|     |                 |                  | 258.4715              | Fe II | $3d^6(^3F_2)4p$        | $3d^6(^3P_2)4d$          | [1]       |
| 383 | 258.59          | 558              | 258.57607             | Fe II | $3d^6(^3H)4s$          | $3d^6(^3F_2)4p$          | [1]       |
|     |                 |                  | 258.58756             | Fe II | $3d^6(^5D)4s$          | $3d^6(^5D)4p$            | [1]       |
| 384 | 258.807         | 111              | 258.794906            | Fe II | $3d^6(^1G_2)4s$        | $3d^6(^1G_2)4p$          | [1]       |
|     |                 |                  | 258.79952             | Fe I  | $3d^64s^2$             | $3d^6(^3H)4s4p(^1P^o)$   | [2]       |

| No. | Wavelength (nm) | Intensity (a.u.) | Wavelength (nm), Ref. | Type  | Lower energy level | Higher energy level            | Reference |
|-----|-----------------|------------------|-----------------------|-------|--------------------|--------------------------------|-----------|
|     |                 |                  | 258.81915             | Fe II | $3d^6(^3P_2)4s$    | $3d^6(^3P_2)4p$                | [1]       |
| 385 | 258.843         | 21               | 258.8303              | Fe I  | $3d^64s^2$         | $3d^7(^4F_{7/2})4f$            | [2]       |
|     |                 |                  | 258.8417              | Fe II | $3d^6(^3G)4p$      | $3d^6(^5D)5d$                  | [1]       |
|     |                 |                  | 258.848               | Fe I  | $3d^64s^2$         | $3d^7(^4F_{7/2})4f$            | [2]       |
|     |                 |                  | 258.848               | Fe II | $3d^6(^5D)4p$      | $3d^6(^5D)4d$                  | [1]       |
| 386 | 258.879         | 76               | 258.87162             | Fe II | $3d^6(^3G)4p$      | $3d^6(^5D)5d$                  | [1]       |
|     |                 |                  | 258.87963             | Fe II | $3d^6(^3H)4p$      | $3d^6(^3F_2)5s$                | [1]       |
|     |                 |                  | 258.87963             | Fe II | $3d^6(^3F_2)4s$    | $3d^6(^3G)4p$                  | [1]       |
|     |                 |                  | 258.8891              | Fe I  | $3d^7(^4F)4s$      | $3d^6(^3P_2)4s4p(^3P^{\circ})$ | [2]       |
| 387 | 259.012         | 53               | 259.0169              | Fe II | $3d^6(^1D_2)4p$    | $3d^54s(^5S)4d$                | [1]       |
|     |                 |                  | 259.02384             | Fe II | $3d^6(^3P_2)4p$    | $3d^6(^3F_2)5s$                | [1]       |
| 388 | 259.205         | 26               | 259.2149              | Fe II | $3d^54s^2$         | $3d^5(^4D)4s4p(^3P^{\circ})$   | [1]       |
|     |                 |                  | 259.2149              | Fe II | $3d^6(^3D)4p$      | $3d^6(^3G)4d$                  | [1]       |
| 389 | 259.373         | 48               | 259.3642              | Fe II | $3d^6(^1S_2)4p$    | $3d^6(^5D)6d$                  | [1]       |
|     |                 |                  | 259.370776            | Fe II | $3d^6(^3G)4p$      | $3d^6(^5D)5d$                  | [1]       |
|     |                 |                  | 259.372778            | Fe II | $3d^6(^5D)4s$      | $3d^6(^5D)4p$                  | [1]       |
| 390 | 259.41          | 191              | 259.40361             | Fe I  | $3d^7(^2G)4s$      | $3d^6(^3F_2)4s4p(^1P^{\circ})$ | [2]       |
|     |                 |                  | 259.41508             | Fe I  | $3d^7(^4F)4s$      | $3d^6(^3F_2)4s4p(^3P^{\circ})$ | [2]       |
| 391 | 259.566         | 26               | 259.5555              | Fe II | $3d^6(^3F_2)4p$    | $3d^6(^5D)6s$                  | [1]       |
|     |                 |                  | 259.5726              | Fe II | $3d^6(^3D)4p$      | $3d^6(^5D)6d$                  | [1]       |
| 392 | 259.699         | 27               | 259.69021             | Fe II | $3d^6(^3G)4p$      | $3d^6(^5D)5d$                  | [1]       |
|     |                 |                  | 259.7097              | Fe II | $3d^6(^3P_1)4s$    | $3d^6(^3F_1)4p$                | [1]       |
| 393 | 259.94          | 3838             | 259.939515            | Fe II | $3d^6(^5D)4s$      | $3d^6(^5D)4p$                  | [1]       |
|     |                 |                  | 259.947056            | Fe II | $3d^6(^3F_2)4s$    | $3d^6(^3G)4p$                  | [1]       |
| 394 | 260.061         | 32               | 260.0482              | Fe II | $3d^6(^3D)4p$      | $3d^6(^3G)4d$                  | [1]       |
|     |                 |                  | 260.0643              | Fe II | $3d^6(^3D)4p$      | $3d^6(^3G)4d$                  | [1]       |
| 395 | 260.145         | 26               | 260.13511             | Fe II | $3d^6(^3H)4p$      | $3d^6(^3H)4d$                  | [1]       |
|     |                 |                  | 260.15426             | Fe II | $3d^6(^3H)4p$      | $3d^6(^3G)5s$                  | [1]       |
|     |                 |                  | 260.1591              | Fe II | $3d^6(^3F_2)4p$    | $3d^6(^3F_2)5s$                | [1]       |
| 396 | 260.386         | 34               | 260.3834              | Fe II | $3d^6(^3F_2)4s$    | $3d^6(^3P_2)4p$                | [1]       |
|     |                 |                  | 260.3834              | Fe II | $3d^6(^3G)4p$      | $3d^6(^5D)5d$                  | [1]       |
| 397 | 260.459         | 28               | 260.4567              | Fe II | $3d^6(^5D)4p$      | $3d^6(^5D)4d$                  | [1]       |
|     |                 |                  | 260.4669              | Fe II | $3d^6(^3F_2)4s$    | $3d^6(^3G)4p$                  | [1]       |
| 398 | 260.567         | 68               | 260.56571             | Fe I  | $3d^7(^4F)4s$      | $3d^6(^3H)4s4p(^3P^{\circ})$   | [2]       |
|     |                 |                  | 260.57418             | Fe II | $3d^6(^3H)4p$      | $3d^6(^3H)4d$                  | [1]       |
| 399 | 260.917         | 36               | 260.90373             | Fe II | $3d^6(^3F_2)4p$    | $3d^6(^3P_2)4d$                | [1]       |

| No. | Wavelength (nm) | Intensity (a.u.) | Wavelength (nm), Ref. | Type  | Lower energy level     | Higher energy level      | Reference |
|-----|-----------------|------------------|-----------------------|-------|------------------------|--------------------------|-----------|
|     |                 |                  | 260.912549            | Fe II | $3d^7$                 | $3d^6(^3G)4p$            | [1]       |
|     |                 |                  | 260.92208             | Fe I  | $3d^7(^2G)4s$          | $3d^6(^3F_2)4s4p(^1P^o)$ | [2]       |
| 400 | 261.013         | 28               | 260.99865             | Fe II | $3d^6(^5D)4d$          | $3d^6(^3H_6)4f$          | [1]       |
|     |                 |                  | 261.000599            | Fe II | $3d^6(^3G)4p$          | $3d^6(^5D)5d$            | [1]       |
|     |                 |                  | 261.0085              | Fe II | $3d^6(^3F_2)4s$        | $3d^6(^3P_2)4p$          | [1]       |
| 401 | 261.387         | 200              | 261.382402            | Fe II | $3d^6(^5D)4s$          | $3d^6(^5D)4p$            | [1]       |
|     |                 |                  | 261.3993              | Fe II | $3d^6(^3G)4p$          | $3d^6(^3F_2)4d$          | [1]       |
| 402 | 261.483         | 43               | 261.478               | Fe I  | $3d^7(^4F)4s$          | $3d^7(^2D_2)4p$          | [2]       |
|     |                 |                  | 261.48711             | Fe II | $3d^6(^3F_2)4s$        | $3d^6(^3H)4p$            | [1]       |
|     |                 |                  | 261.4912              | Fe II | $3d^6(^3G)4s$          | $3d^6(^3F_2)4p$          | [1]       |
|     |                 |                  | 261.4944              | Fe I  | $3d^64s^2$             | $3d^6(^3H)4s4p(^1P^o)$   | [2]       |
| 403 | 261.568         | 26               | 261.5748              | Fe II | $3d^6(^3D)4s$          | $3d^6(^3G)4p$            | [1]       |
|     |                 |                  | 261.5826              | Fe II | $3d^6(^3F_2)4s$        | $3d^6(^3H)4p$            | [1]       |
| 404 | 261.773         | 152              | 261.761713            | Fe II | $3d^6(^5D)4s$          | $3d^6(^5D)4p$            | [1]       |
|     |                 |                  | 261.761713            | Fe II | $3d^6(^3G)4p$          | $3d^6(^3H)4d$            | [1]       |
|     |                 |                  | 261.7723              | Fe II | $3d^6(^3D)4p$          | $3d^6(^3G)4d$            | [1]       |
| 405 | 262.363         | 377              | 262.35337             | Fe I  | $3d^7(^4F)4s$          | $3d^6(^3F_2)4s4p(^3P^o)$ | [2]       |
|     |                 |                  | 262.37008             | Fe II | $3d^6(^5D)4p$          | $3d^6(^5D)4d$            | [1]       |
|     |                 |                  | 262.37251             | Fe II | $3d^6(^3F_2)4s$        | $3d^6(^3H)4p$            | [1]       |
| 406 | 262.52          | 52               | 262.5067              | Fe II | $3d^54s^2$             | $3d^5(^4G)4s4p(^3P^o)$   | [1]       |
|     |                 |                  | 262.51854             | Fe II | $3d^6(^5D)4p$          | $3d^6(^5D)4d$            | [1]       |
| 407 | 262.834         | 149              | 262.81975             | Fe II | $3d^6(^3G)4p$          | $3d^6(^3H)4d$            | [1]       |
|     |                 |                  | 262.829279            | Fe II | $3d^6(^5D)4s$          | $3d^6(^5D)4p$            | [1]       |
|     |                 |                  | 262.8418              | Fe II | $3d^6(^3G)4p$          | $3d^6(^5D)5d$            | [1]       |
| 408 | 262.966         | 47               | 262.95705             | Fe II | $3d^54s^2$             | $3d^5(^4G)4s4p(^3P^o)$   | [1]       |
|     |                 |                  | 262.958817            | Fe II | $3d^6(^3F_2)4s$        | $3d^6(^3H)4p$            | [1]       |
| 409 | 263.111         | 479              | 263.101002            | Fe II | $3d^6(^3F_2)4s$        | $3d^6(^3H)4p$            | [1]       |
|     |                 |                  | 263.104679            | Fe II | $3d^6(^5D)4s$          | $3d^6(^5D)4p$            | [1]       |
| 410 | 263.135         | 434              | 263.132292            | Fe II | $3d^6(^5D)4s$          | $3d^6(^5D)4p$            | [1]       |
|     |                 |                  | 263.1437              | Fe II | $3d^54s^2$             | $3d^6(^3P_1)4p$          | [1]       |
| 411 | 263.328         | 54               | 263.32028             | Fe II | $3d^6(^1D_2)4s$        | $3d^6(^1S_2)4p$          | [1]       |
|     |                 |                  | 263.3324              | Fe II | $3d^5(^6S)4s4p(^3P^o)$ | $3d^6(^5D)5d$            | [1]       |
| 412 | 263.581         | 186              | 263.57211             | Fe I  | $3d^64s^2$             | $3d^6(^3D)4s4p(^3P^o)$   | [2]       |
|     |                 |                  | 263.58087             | Fe I  | $3d^7(^4F)4s$          | $3d^6(^3F_2)4s4p(^3P^o)$ | [2]       |
| 413 | 263.725         | 39               | 263.7115              | Fe II | $3d^6(^3G)4p$          | $3d^6(^3H)4d$            | [1]       |
|     |                 |                  | 263.7174              | Fe II | $3d^6(^3G)4p$          | $3d^6(^3H)4d$            | [1]       |

| No. | Wavelength (nm) | Intensity (a.u.) | Wavelength (nm), Ref. | Type  | Lower energy level     | Higher energy level     | Reference |
|-----|-----------------|------------------|-----------------------|-------|------------------------|-------------------------|-----------|
|     |                 |                  | 263.7306              | Fe II | $3d^6(^5D)4p$          | $3d^6(^5D)5s$           | [1]       |
|     |                 |                  | 263.7378              | Fe II | $3d^6(^3G)4p$          | $3d^6(^3G)5s$           | [1]       |
| 414 | 264.111         | 37               | 264.10292             | Fe I  | $3d^64s^2$             | $3d^6(^3D)4s4p(^3P^o)$  | [2]       |
|     |                 |                  | 264.11242             | Fe II | $3d^6(^3P2)4s$         | $3d^6(^3P2)4p$          | [1]       |
| 415 | 264.171         | 42               | 264.16436             | Fe I  | $3d^7(^4F)4s$          | $3d^6(^3P2)4s4p(^3P^o)$ | [2]       |
|     |                 |                  | 264.164374            | Fe II | $3d^6(^3P2)4p$         | $3d^6(^3P2)5s$          | [1]       |
|     |                 |                  | 264.1789              | Fe II | $3d^6(^3D)4p$          | $3d^6(^3G)4d$           | [1]       |
| 416 | 264.4           | 129              | 264.39984             | Fe I  | $3d^7(^4F)4s$          | $3d^6(^3F2)4s4p(^3P^o)$ | [2]       |
|     |                 |                  | 264.40981             | Fe II | $3d^6(^3D)4p$          | $3d^6(^3G)4d$           | [1]       |
| 417 | 264.485         | 67               | 264.4792              | Fe I  | $3d^6(^5D)4s4p(^3P^o)$ | $3d^64s(^6D)5d$         | [2]       |
|     |                 |                  | 264.49905             | Fe II | $3d^6(^3P2)4p$         | $3d^6(^3P2)5s$          | [1]       |
| 418 | 264.521         | 25               | 264.50819             | Fe II | $3d^6(^3F2)4s$         | $3d^6(^3F2)4p$          | [1]       |
|     |                 |                  | 264.50819             | Fe II | $3d^7$                 | $3d^6(^3G)4p$           | [1]       |
|     |                 |                  | 264.51983             | Fe II | $3d^6(^3P1)4s$         | $3d^6(^3P1)4p$          | [1]       |
|     |                 |                  | 264.53338             | Fe II | $3d^6(^3F1)4s$         | $3d^6(^3P1)4p$          | [1]       |
| 419 | 264.641         | 23               | 264.6322              | Fe II | $3d^6(^3F1)4s$         | $3d^6(^3F1)4p$          | [1]       |
|     |                 |                  | 264.63672             | Fe II | $3d^6(^3D)4p$          | $3d^6(^3G)4d$           | [1]       |
|     |                 |                  | 264.6393              | Fe I  | $3d^6(^5D)4s4p(^3P^o)$ | $3d^64s(^6D)5d$         | [2]       |
|     |                 |                  | 264.6485              | Fe II | $3d^6(^3G)4p$          | $3d^6(^3F2)4d$          | [1]       |
|     |                 |                  | 264.6511              | Fe I  | $3d^6(^5D)4s4p(^3P^o)$ | $3d^64s(^6D)5d$         | [2]       |
| 420 | 264.726         | 183              | 264.7212              | Fe II | $3d^5(^6S)4s4p(^3P^o)$ | $3d^6(^3F2)4d$          | [1]       |
|     |                 |                  | 264.72451             | Fe II | $3d^5(^6S)4s4p(^3P^o)$ | $3d^6(^5D)5d$           | [1]       |
|     |                 |                  | 264.7395              | Fe I  | $3d^64s^2$             | $3d^6(^3D)4s4p(^3P^o)$  | [2]       |
|     |                 |                  | 264.7395              | Fe II | $3d^6(^3H)4p$          | $3d^6(^3H)5s$           | [1]       |
| 421 | 265.003         | 28               | 264.99119             | Fe I  | $3d^64s^2$             | $3d^6(^3H)4s4p(^1P^o)$  | [2]       |
|     |                 |                  | 264.9973              | Fe II | $3d^6(^1G1)4s$         | $3d^5(^4G)4s4p(^3P^o)$  | [1]       |
|     |                 |                  | 265.00192             | Fe II | $3d^6(^3P2)4p$         | $3d^6(^3P2)5s$          | [1]       |
| 422 | 265.304         | 36               | 265.3051              | Fe I  | $3d^6(^5D)4s4p(^3P^o)$ | $3d^64s(^6D)5d$         | [2]       |
|     |                 |                  | 265.3138              | Fe I  | $3d^64s^2$             | $3d^6(^1I)4s4p(^3P^o)$  | [2]       |
| 423 | 265.448         | 138              | 265.433               | Fe II | $3d^6(^3D)4p$          | $3d^6(^3G)4d$           | [1]       |
|     |                 |                  | 265.4402              | Fe II | $3d^6(^1I)4p$          | $3d^6(^1I)5s$           | [1]       |
|     |                 |                  | 265.46285             | Fe II | $3d^6(^5D)4p$          | $3d^6(^5D)4d$           | [1]       |
| 424 | 265.593         | 26               | 265.6001              | Fe II | $3d^5(^6S)4s4p(^3P^o)$ | $3d^6(^3F2)5s$          | [1]       |
|     |                 |                  | 265.6039              | Fe II | $3d^5(^6S)4s4p(^3P^o)$ | $3d^6(^5D)5d$           | [1]       |
|     |                 |                  | 265.6039              | Fe II | $3d^6(^3G)4p$          | $3d^6(^3F2)4d$          | [1]       |
| 425 | 266.436         | 52               | 266.42591             | Fe II | $3d^6(^3F1)4s$         | $3d^5(^4G)4s4p(^3P^o)$  | [1]       |

| No. | Wavelength (nm) | Intensity (a.u.) | Wavelength (nm), Ref. | Type  | Lower energy level     | Higher energy level     | Reference |
|-----|-----------------|------------------|-----------------------|-------|------------------------|-------------------------|-----------|
|     |                 |                  | 266.4448              | Fe II | $3d^6(^3G)4p$          | $3d^6(^3H)4d$           | [1]       |
| 426 | 266.473         | 92               | 266.466347            | Fe II | $3d^6(^3F2)4s$         | $3d^6(^3F2)4p$          | [1]       |
|     |                 |                  | 266.4783              | Fe II | $3d^6(^3D)4p$          | $3d^6(^3G)4d$           | [1]       |
| 427 | 266.689         | 259              | 266.67509             | Fe II | $3d^6(^3H)4p$          | $3d^6(^3H)5s$           | [1]       |
|     |                 |                  | 266.68123             | Fe I  | $3d^7(^4F)4s$          | $3d^6(^3F2)4s4p(^3P^o)$ | [2]       |
|     |                 |                  | 266.69122             | Fe II | $3d^6(^3P2)4s$         | $3d^6(^3F2)4p$          | [1]       |
|     |                 |                  | 266.69648             | Fe I  | $3d^7(^4F)4s$          | $3d^7(^2G)4p$           | [2]       |
| 428 | 267.111         | 21               | 267.1033              | Fe II | $3d^6(^3P1)4s$         | $3d^5(^4G)4s4p(^3P^o)$  | [1]       |
|     |                 |                  | 267.1074              | Fe II | $3d^6(^1G2)4p$         | $3d^6(^3G)4d$           | [1]       |
|     |                 |                  | 267.1171              | Fe II | $3d^6(^3F1)4s$         | $3d^5(^4G)4s4p(^3P^o)$  | [1]       |
| 429 | 267.906         | 528              | 267.9024              | Fe I  | $3d^64s^2$             | $3d^6(^1I)4s4p(^3P^o)$  | [2]       |
|     |                 |                  | 267.90616             | Fe I  | $3d^7(^4F)4s$          | $3d^6(^3F2)4s4p(^3P^o)$ | [2]       |
|     |                 |                  | 267.9163              | Fe II | $3d^6(^3G)4p$          | $3d^6(^3H)4d$           | [1]       |
|     |                 |                  | 267.921               | Fe I  | $3d^6(^5D)4s4p(^3P^o)$ | $3d^64s(^6D)5d$         | [2]       |
| 430 | 268.159         | 28               | 268.14607             | Fe I  | $3d^6(^5D)4s4p(^3P^o)$ | $3d^64s(^6D)5d$         | [2]       |
|     |                 |                  | 268.15856             | Fe I  | $3d^6(^5D)4s4p(^3P^o)$ | $3d^64s(^6D)5d$         | [2]       |
| 431 | 268.195         | 34               | 268.1887              | Fe I  | $3d^64s^2$             | $3d^64s(^4D)5p$         | [2]       |
|     |                 |                  | 268.2039              | Fe II | $3d^54s^2$             | $3d^5(^4D)4s4p(^3P^o)$  | [1]       |
|     |                 |                  | 268.2039              | Fe II | $3d^6(^3D)4p$          | $3d^6(^3G)4d$           | [1]       |
| 432 | 268.219         | 28               | 268.22108             | Fe I  | $3d^6(^5D)4s4p(^3P^o)$ | $3d^64s(^6D)5d$         | [2]       |
|     |                 |                  | 268.2267              | Fe II | $3d^6(^1S2)4s$         | $3d^6(^3D)4p$           | [1]       |
| 433 | 268.496         | 86               | 268.48558             | Fe I  | $3d^7(^4F)4s$          | $3d^6(^3P2)4s4p(^3P^o)$ | [2]       |
|     |                 |                  | 268.496               | Fe II | $3d^6(^3G)4s$          | $3d^6(^3H)4p$           | [1]       |
| 434 | 268.628         | 36               | 268.621698            | Fe II | $3d^6(^1I)4p$          | $3d^6(^1I)5s$           | [1]       |
|     |                 |                  | 268.63876             | Fe II | $3d^6(^3F2)4s$         | $3d^6(^3P2)4p$          | [1]       |
| 435 | 268.93          | 407              | 268.92121             | Fe I  | $3d^7(^4F)4s$          | $3d^6(^3F2)4s4p(^3P^o)$ | [2]       |
|     |                 |                  | 268.9342              | Fe II | $3d^54s^2$             | $3d^6(^3F2)5p$          | [1]       |
|     |                 |                  | 268.94136             | Fe I  | $3d^6(^5D)4s4p(^3P^o)$ | $3d^64s(^6D)5d$         | [2]       |
| 436 | 269.267         | 67               | 269.2601              | Fe I  | $3d^64s^2$             | $3d^64s(^6D_{9/2})4f$   | [2]       |
|     |                 |                  | 269.260157            | Fe II | $3d^6(^3G)4s$          | $3d^6(^3G)4p$           | [1]       |
|     |                 |                  | 269.26501             | Fe I  | $3d^7(^4F)4s$          | $3d^6(^3P2)4s4p(^3P^o)$ | [2]       |
|     |                 |                  | 269.281               | Fe I  | $3d^64s^2$             | $3d^64s(^4D)5p$         | [2]       |
| 437 | 269.556         | 33               | 269.55309             | Fe I  | $3d^6(^5D)4s4p(^3P^o)$ | $3d^64s(^6D)5d$         | [2]       |
|     |                 |                  | 269.55882             | Fe I  | $3d^7(^2G)4s$          | $3d^6(^3H)4s4p(^1P^o)$  | [2]       |
|     |                 |                  | 269.56512             | Fe I  | $3d^6(^5D)4s4p(^3P^o)$ | $3d^64s(^6D)5d$         | [2]       |
| 438 | 269.604         | 58               | 269.59894             | Fe I  | $3d^6(^5D)4s4p(^3P^o)$ | $3d^64s(^6D)5d$         | [2]       |

| No. | Wavelength (nm) | Intensity (a.u.) | Wavelength (nm), Ref. | Type  | Lower energy level     | Higher energy level     | Reference |
|-----|-----------------|------------------|-----------------------|-------|------------------------|-------------------------|-----------|
|     |                 |                  | 269.6123              | Fe II | $3d^6(^3P2)4p$         | $3d^6(^3P2)5s$          | [1]       |
|     |                 |                  | 269.61232             | Fe I  | $3d^6(^5D)4s4p(^3P^o)$ | $3d^64s(^6D_{3/2})6d$   | [2]       |
| 439 | 269.628         | 67               | 269.62809             | Fe I  | $3d^6(^5D)4s4p(^3P^o)$ | $3d^64s(^6D)5d$         | [2]       |
|     |                 |                  | 269.6385              | Fe II | $3d^6(^1G2)4p$         | $3d^6(^3G)4d$           | [1]       |
|     |                 |                  | 269.6426              | Fe II | $3d^6(^3G)4p$          | $3d^6(^3P2)4d$          | [1]       |
| 440 | 269.917         | 92               | 269.91065             | Fe I  | $3d^7(^4F)4s$          | $3d^6(^3F2)4s4p(^3P^o)$ | [2]       |
|     |                 |                  | 269.9185              | Fe II | $3d^6(^3P1)4s$         | $3d^6(^3P1)4p$          | [5]       |
| 441 | 269.953         | 35               | 269.938               | Fe II | $3d^6(^5D)4p$          | $3d^6(^5D)4d$           | [1]       |
|     |                 |                  | 269.96228             | Fe II | $3d^6(^1I)4p$          | $3d^6(^3G)4d$           | [1]       |
| 442 | 270.278         | 39               | 270.2637              | Fe I  | $3d^64s^2$             | $3d^64s(^6D_{3/2})4f$   | [2]       |
|     |                 |                  | 270.2768              | Fe I  | $3d^6(^5D)4s4p(^3P^o)$ | $3d^64s(^6D)5d$         | [2]       |
|     |                 |                  | 270.29151             | Fe I  | $3d^6(^5D)4s4p(^3P^o)$ | $3d^64s(^6D_{3/2})6d$   | [2]       |
| 443 | 270.398         | 64               | 270.398879            | Fe II | $3d^6(^3F2)4s$         | $3d^6(^3F2)4p$          | [1]       |
|     |                 |                  | 270.4099              | Fe I  | $3d^6(^5D)4s4p(^3P^o)$ | $3d^64s(^6D)5d$         | [2]       |
| 444 | 270.471         | 50               | 270.45771             | Fe II | $3d^6(^3G)4s$          | $3d^6(^3F2)4p$          | [1]       |
|     |                 |                  | 270.45773             | Fe I  | $3d^6(^5D)4s4p(^3P^o)$ | $3d^64s(^6D)5d$         | [2]       |
|     |                 |                  | 270.46149             | Fe I  | $3d^64s^2$             | $3d^64s(^6D_{9/2})4f$   | [2]       |
|     |                 |                  | 270.47557             | Fe II | $3d^6(^3G)4p$          | $3d^6(^3G)5s$           | [1]       |
|     |                 |                  | 270.4793              | Fe I  | $3d^64s^2$             | $3d^64s(^4D)5p$         | [2]       |
| 445 | 270.603         | 58               | 270.60124             | Fe I  | $3d^64s^2$             | $3d^6(^1I)4s4p(^3P^o)$  | [2]       |
|     |                 |                  | 270.60785             | Fe II | $3d^6(^3P2)4p$         | $3d^6(^3P2)5s$          | [1]       |
| 446 | 270.663         | 245              | 270.65817             | Fe I  | $3d^7(^4F)4s$          | $3d^6(^3F2)4s4p(^3P^o)$ | [2]       |
|     |                 |                  | 270.6582              | Fe I  | $3d^6(^5D)4s4p(^3P^o)$ | $3d^64s(^6D_{1/2})6d$   | [2]       |
| 447 | 270.88          | 173              | 270.87223             | Fe II | $3d^6(^3G)4s$          | $3d^6(^3P2)4p$          | [1]       |
|     |                 |                  | 270.8838              | Fe II | $3d^6(^1I)4p$          | $3d^6(^3G)4d$           | [1]       |
|     |                 |                  | 270.88927             | Fe I  | $3d^6(^5D)4s4p(^3P^o)$ | $3d^64s(^6D_{3/2})6d$   | [2]       |
| 448 | 271.626         | 94               | 271.621707            | Fe II | $3d^6(^3F2)4s$         | $3d^6(^3F2)4p$          | [1]       |
|     |                 |                  | 271.62573             | Fe I  | $3d^64s^2$             | $3d^6(^1G2)4s4p(^3P^o)$ | [2]       |
| 449 | 271.783         | 33               | 271.77864             | Fe I  | $3d^7(^4F)4s$          | $3d^7(^4P)4p$           | [2]       |
|     |                 |                  | 271.78737             | Fe II | $3d^6(^3H)4p$          | $3d^6(^3H)5s$           | [1]       |
|     |                 |                  | 271.79288             | Fe II | $3d^6(^3P2)4p$         | $3d^6(^3P2)5s$          | [1]       |
|     |                 |                  | 271.79694             | Fe II | $3d^6(^5D)4p$          | $3d^6(^5D)5s$           | [1]       |
| 450 | 271.903         | 11395            | 271.900215            | Fe II | $3d^6(^3H)4p$          | $3d^6(^3H)5s$           | [1]       |
|     |                 |                  | 271.90272             | Fe I  | $3d^64s^2$             | $3d^6(^5D)4s4p(^1P^o)$  | [2]       |
|     |                 |                  | 271.9138              | Fe I  | $3d^64s^2$             | $3d^6(^3H)4s4p(^1P^o)$  | [2]       |

| No. | Wavelength (nm) | Intensity (a.u.) | Wavelength (nm), Ref. | Type  | Lower energy level         | Higher energy level         | Reference |
|-----|-----------------|------------------|-----------------------|-------|----------------------------|-----------------------------|-----------|
| 451 | 272.024         | 46               | 272.01966             | Fe I  | $3d^7(^4P)4s$              | $3d^6(^3D)4s4p(^3P^\circ)$  | [2]       |
|     |                 |                  | 272.0352              | Fe II | $3d^54s^2$                 | $3d^6(^3F2)5p$              | [1]       |
| 452 | 272.096         | 2998             | 272.09021             | Fe I  | $3d^64s^2$                 | $3d^6(^5D)4s4p(^1P^\circ)$  | [2]       |
|     |                 |                  | 272.11067             | Fe I  | $3d^7(^4P)4s$              | $3d^7(^4F)5p$               | [2]       |
| 453 | 272.204         | 35               | 272.20388             | Fe I  | $3d^7(^4F)4s$              | $3d^6(^3H)4s4p(^3P^\circ)$  | [2]       |
|     |                 |                  | 272.20625             | Fe II | $3d^6(^3F2)4s$             | $3d^6(^3F2)4p$              | [1]       |
| 454 | 272.361         | 644              | 272.35773             | Fe I  | $3d^64s^2$                 | $3d^6(^5D)4s4p(^1P^\circ)$  | [2]       |
|     |                 |                  | 272.37                | Fe II | $3d^6(^1D2)4p$             | $3d^54s(^5S)5s$             | [1]       |
|     |                 |                  | 272.37                | Fe II | $3d^6(^5D)5s$              | $3d^6(^3G)5p$               | [1]       |
| 455 | 272.493         | 104              | 272.488385            | Fe II | $3d^6(^5D)4s$              | $3d^6(^5D)4p$               | [1]       |
|     |                 |                  | 272.49531             | Fe I  | $3d^7(^4F)4s$              | $3d^6(^3F2)4s4p(^3P^\circ)$ | [2]       |
|     |                 |                  | 272.49531             | Fe I  | $3d^6(^5D)4s4p(^3P^\circ)$ | $3d^64s(^6D_{7/2})6d$       | [2]       |
|     |                 |                  | 272.5016              | Fe I  | $3d^64s^2$                 | $3d^7(^4F)4p$               | [2]       |
| 456 | 272.565         | 50               | 272.56018             | Fe I  | $3d^7(^4F)4s$              | $3d^6(^3F2)4s4p(^3P^\circ)$ | [2]       |
|     |                 |                  | 272.5625              | Fe I  | $3d^6(^5D)4s4p(^3P^\circ)$ | $3d^6(^5D)4p(^3P)$          | [2]       |
|     |                 |                  | 272.56429             | Fe II | $3d^6(^3D)4p$              | $3d^6(^3G)4d$               | [1]       |
| 457 | 272.613         | 57               | 272.60551             | Fe I  | $3d^7(^4F)4s$              | $3d^6(^3F2)4s4p(^3P^\circ)$ | [2]       |
|     |                 |                  | 272.62326             | Fe I  | $3d^64s^2$                 | $3d^6(^3D)4s4p(^3P^\circ)$  | [2]       |
|     |                 |                  | 272.62656             | Fe II | $3d^6(^3D)4p$              | $3d^6(^3D)5s$               | [1]       |
| 458 | 272.758         | 82               | 272.753885            | Fe II | $3d^6(^5D)4s$              | $3d^6(^5D)4p$               | [1]       |
|     |                 |                  | 272.7717              | Fe II | $3d^6(^3G)4p$              | $3d^6(^3G)5s$               | [1]       |
| 459 | 272.806         | 105              | 272.79324             | Fe II | $3d^6(^5D)4p$              | $3d^6(^5D)5s$               | [1]       |
|     |                 |                  | 272.80208             | Fe I  | $3d^7(^4F)4s$              | $3d^6(^3F2)4s4p(^3P^\circ)$ | [2]       |
| 460 | 273.071         | 34               | 273.06992             | Fe II | $3d^6(^3G)4p$              | $3d^6(^3F2)4d$              | [1]       |
|     |                 |                  | 273.073399            | Fe II | $3d^6(^5D)4s$              | $3d^6(^5D)4p$               | [1]       |
| 461 | 273.359         | 1622             | 273.35066             | Fe II | $3d^6(^3G)4p$              | $3d^6(^3G)5s$               | [1]       |
|     |                 |                  | 273.35803             | Fe I  | $3d^7(^4F)4s$              | $3d^6(^3P2)4s4p(^3P^\circ)$ | [2]       |
| 462 | 273.42          | 52               | 273.42671             | Fe I  | $3d^7(^4P)4s$              | $3d^6(^3D)4s4p(^3P^\circ)$  | [2]       |
|     |                 |                  | 273.42671             | Fe I  | $3d^7(^4P)4s$              | $3d^7(^4F)5p$               | [2]       |
| 463 | 273.552         | 562              | 273.54203             | Fe II | $3d^6(^1G2)4p$             | $3d^6(^3D)5s$               | [1]       |
|     |                 |                  | 273.54751             | Fe I  | $3d^7(^4F)4s$              | $3d^6(^3P2)4s4p(^3P^\circ)$ | [2]       |
|     |                 |                  | 273.5612              | Fe I  | $3d^7(^4P)4s$              | $3d^6(^3D)4s4p(^3P^\circ)$  | [2]       |
| 464 | 273.733         | 990              | 273.7309              | Fe I  | $3d^64s^2$                 | $3d^6(^5D)4s4p(^1P^\circ)$  | [2]       |
|     |                 |                  | 273.7426              | Fe II | $3d^5(^6S)4s4p(^3P^\circ)$ | $3d^6(^3H)5s$               | [1]       |
| 465 | 273.949         | 630              | 273.94192             | Fe II | $3d^6(^3D)4p$              | $3d^6(^3D)5s$               | [1]       |
|     |                 |                  | 273.9511              | Fe II | $3d^6(^3H)4s$              | $3d^6(^3H)4p$               | [1]       |

| No. | Wavelength (nm) | Intensity (a.u.) | Wavelength (nm), Ref. | Type  | Lower energy level         | Higher energy level          | Reference |
|-----|-----------------|------------------|-----------------------|-------|----------------------------|------------------------------|-----------|
|     |                 |                  | 273.954721            | Fe II | $3d^6(^5D)4s$              | $3d^6(^5D)4p$                | [1]       |
| 466 | 274.238         | 2492             | 274.2254              | Fe I  | $3d^7(^4F)4s$              | $3d^6(^3P_2)4s4p(^3P^\circ)$ | [2]       |
|     |                 |                  | 274.23316             | Fe I  | $3d^7(^4P)4s$              | $3d^6(^3D)4s4p(^3P^\circ)$   | [2]       |
|     |                 |                  | 274.24052             | Fe I  | $3d^6 4s^2$                | $3d^6(^5D)4s4p(^1P^\circ)$   | [2]       |
|     |                 |                  | 274.2459              | Fe II | $3d^5 4s^2$                | $3d^5(^4D)4s4p(^3P^\circ)$   | [1]       |
|     |                 |                  | 274.24746             | Fe II | $3d^6(^3D)4p$              | $3d^6(^3D)5s$                | [1]       |
|     |                 |                  | 274.24746             | Fe II | $3d^6(^3G)4p$              | $3d^6(^3F_2)4d$              | [1]       |
| 467 | 274.322         | 257              | 274.319657            | Fe II | $3d^6(^5D)4s$              | $3d^6(^5D)4p$                | [1]       |
|     |                 |                  | 274.32188             | Fe II | $3d^6(^5D)4p$              | $3d^6(^5D)5s$                | [1]       |
| 468 | 274.406         | 331              | 274.40673             | Fe I  | $3d^6 4s^2$                | $3d^6(^5D)4s4p(^1P^\circ)$   | [2]       |
|     |                 |                  | 274.4193              | Fe II | $3d^6(^3D)4p$              | $3d^6(^3G)4d$                | [1]       |
| 469 | 274.454         | 85               | 274.45273             | Fe I  | $3d^7(^4F)4s$              | $3d^6(^3P_2)4s4p(^3P^\circ)$ | [2]       |
|     |                 |                  | 274.46505             | Fe II | $3d^6(^3D)4p$              | $3d^6(^3D)5s$                | [1]       |
| 470 | 274.503         | 66               | 274.4894              | Fe II | $3d^6(^3F_2)4s$            | $3d^6(^3F_2)4p$              | [1]       |
|     |                 |                  | 274.4941              | Fe II | $3d^5 4s^2$                | $3d^5(^4D)4s4p(^3P^\circ)$   | [1]       |
| 471 | 274.647         | 470              | 274.63561             | Fe II | $3d^6(^3F_1)4s$            | $3d^6(^3P_1)4p$              | [1]       |
|     |                 |                  | 274.648346            | Fe II | $3d^6(^5D)4s$              | $3d^6(^5D)4p$                | [1]       |
|     |                 |                  | 274.6518              | Fe II | $3d^6(^3D)4s$              | $3d^6(^3D)4p$                | [1]       |
| 472 | 274.695         | 356              | 274.681               | Fe II | $3d^6(^1G_2)4p$            | $3d^5 4s(^7S)4d$             | [1]       |
|     |                 |                  | 274.698162            | Fe II | $3d^6(^5D)4s$              | $3d^6(^5D)4p$                | [1]       |
|     |                 |                  | 274.69818             | Fe I  | $3d^7(^4F)4s$              | $3d^6(^3H)4s4p(^3P^\circ)$   | [2]       |
| 473 | 274.827         | 118              | 274.8197              | Fe I  | $3d^6 4s^2$                | $3d^6 4s(^6D)6p$             | [2]       |
|     |                 |                  | 274.82011             | Fe II | $3d^6(^3G)4p$              | $3d^6(^3F_2)4d$              | [1]       |
| 474 | 274.888         | 168              | 274.8949              | Fe II | $3d^6(^3G)4p$              | $3d^6(^3G)5s$                | [1]       |
|     |                 |                  | 274.89841             | Fe II | $3d^6(^3G)4s$              | $3d^5(^6S)4s4p(^3P^\circ)$   | [1]       |
| 475 | 274.936         | 875              | 274.932126            | Fe II | $3d^6(^5D)4s$              | $3d^6(^5D)4p$                | [1]       |
|     |                 |                  | 274.935257            | Fe II | $3d^6(^3G)4p$              | $3d^6(^3G)5s$                | [1]       |
|     |                 |                  | 274.94343             | Fe II | $3d^6(^3D)4p$              | $3d^6(^3D)5s$                | [1]       |
|     |                 |                  | 274.948576            | Fe II | $3d^6(^5D)4s$              | $3d^6(^5D)4p$                | [1]       |
| 476 | 275.008         | 2077             | 275.00059             | Fe II | $3d^6(^3G)4s$              | $3d^6(^3F_2)4p$              | [1]       |
|     |                 |                  | 275.00507             | Fe I  | $3d^6(^5D)4s4p(^3P^\circ)$ | $3d^6(^5D)4p^2(^3P)$         | [2]       |
|     |                 |                  | 275.01404             | Fe I  | $3d^6 4s^2$                | $3d^6(^5D)4s4p(^1P^\circ)$   | [2]       |
| 477 | 275.08          | 77               | 275.06966             | Fe I  | $3d^7(^4P)4s$              | $3d^6(^3D)4s4p(^3P^\circ)$   | [2]       |
|     |                 |                  | 275.08734             | Fe I  | $3d^7(^4P)4s$              | $3d^6(^3D)4s4p(^3P^\circ)$   | [2]       |
|     |                 |                  | 275.09152             | Fe II | $3d^6(^3G)4s$              | $3d^6(^3H)4p$                | [1]       |
| 478 | 275.212         | 27               | 275.2105              | Fe II | $3d^6(^3F_1)4s$            | $3d^6(^1F)4p$                | [1]       |



| No. | Wavelength (nm) | Intensity (a.u.) | Wavelength (nm), Ref. | Type  | Lower energy level     | Higher energy level      | Reference |
|-----|-----------------|------------------|-----------------------|-------|------------------------|--------------------------|-----------|
|     |                 |                  | 275.215               | Fe I  | $3d^6(^5D)4s4p(^3P^o)$ | $3d^64s(^6D_{7/2})6d$    | [2]       |
|     |                 |                  | 275.21504             | Fe II | $3d^6(^5D)4p$          | $3d^6(^5D)5s$            | [1]       |
| 479 | 275.333         | 99               | 275.324               | Fe I  | $3d^64s^2$             | $3d^7(^2H)4p$            | [2]       |
|     |                 |                  | 275.3285              | Fe I  | $3d^64s^2$             | $3d^6(^3G)4s4p(^3P^o)$   | [2]       |
|     |                 |                  | 275.328738            | Fe II | $3d^6(^3H)4s$          | $3d^6(^3H)4p$            | [1]       |
| 480 | 275.369         | 62               | 275.36867             | Fe I  | $3d^7(^4F)4s$          | $3d^6(^3P_2)4s4p(^3P^o)$ | [2]       |
|     |                 |                  | 275.37594             | Fe II | $3d^6(^3D)4s$          | $3d^6(^3D)4p$            | [1]       |
|     |                 |                  | 275.37918             | Fe I  | $3d^7(^2G)4s$          | $3d^6(^3H)4s4p(^1P^o)$   | [2]       |
| 481 | 275.405         | 82               | 275.39661             | Fe I  | $3d^6(^5D)4s4p(^3P^o)$ | $3d^64s(^6D_{9/2})6d$    | [2]       |
|     |                 |                  | 275.40319             | Fe I  | $3d^7(^4F)4s$          | $3d^6(^3F_2)4s4p(^3P^o)$ | [2]       |
| 482 | 275.441         | 72               | 275.44271             | Fe I  | $3d^7(^4F)4s$          | $3d^6(^3F_2)4s4p(^3P^o)$ | [2]       |
|     |                 |                  | 275.4552              | Fe I  | $3d^6(^5D)4s4p(^3P^o)$ |                          | [2]       |
| 483 | 275.573         | 1350             | 275.5659              | Fe I  | $3d^6(^5D)4s4p(^3P^o)$ | $3d^64s(^6D_{9/2})6d$    | [2]       |
|     |                 |                  | 275.566               | Fe II | $3d^6(^3D)4p$          | $3d^6(^3G)4d$            | [1]       |
|     |                 |                  | 275.57362             | Fe II | $3d^6(^5D)4s$          | $3d^6(^5D)4p$            | [1]       |
| 484 | 275.634         | 373              | 275.62666             | Fe I  | $3d^64s^2$             | $3d^7(^4F)4p$            | [2]       |
|     |                 |                  | 275.6328              | Fe I  | $3d^64s^2$             | $3d^6(^5D)4s4p(^1P^o)$   | [2]       |
| 485 | 275.73          | 88               | 275.73153             | Fe I  | $3d^7(^4F)4s$          | $3d^6(^3P_2)4s4p(^3P^o)$ | [2]       |
|     |                 |                  | 275.74224             | Fe I  | $3d^7(^4F)4s$          | $3d^6(^3G)4s4p(^3P^o)$   | [2]       |
| 486 | 275.982         | 38               | 275.9723              | Fe I  | $3d^64s^2$             | $3d^6(^3F_2)4s4p(^1P^o)$ | [2]       |
|     |                 |                  | 275.98136             | Fe I  | $3d^7(^4F)4s$          | $3d^6(^3F_2)4s4p(^3P^o)$ | [2]       |
|     |                 |                  | 275.9922              | Fe I  | $3d^64s^2$             | $3d^6(^3G)4s4p(^3P^o)$   | [2]       |
| 487 | 276.175         | 117              | 276.17796             | Fe I  | $3d^7(^4F)4s$          | $3d^6(^3P_2)4s4p(^3P^o)$ | [2]       |
|     |                 |                  | 276.18127             | Fe II | $3d^6(^5D)4s$          | $3d^6(^5D)4p$            | [1]       |
| 488 | 276.427         | 37               | 276.41555             | Fe II | $3d^6(^3G)4p$          | $3d^6(^5D)5d$            | [1]       |
|     |                 |                  | 276.43229             | Fe I  | $3d^7(^4P)4s$          | $3d^6(^3D)4s4p(^3P^o)$   | [2]       |
| 489 | 276.644         | 38               | 276.63724             | Fe II | $3d^6(^3D)4p$          | $3d^6(^3D)5s$            | [1]       |
|     |                 |                  | 276.6439              | Fe I  | $3d^6(^5D)4s4p(^3P^o)$ | $3d^64s(^6D_{9/2})6d$    | [2]       |
|     |                 |                  | 276.64479             | Fe II | $3d^6(^3F_2)4p$        | $3d^6(^3H)5s$            | [1]       |
|     |                 |                  | 276.655               | Fe I  | $3d^64s^2$             | $3d^6(^3F_2)4s4p(^1P^o)$ | [2]       |
|     |                 |                  | 276.65514             | Fe I  | $3d^64s^2$             | $3d^64s(^6D)6p$          | [2]       |
|     |                 |                  | 276.65514             | Fe I  | $3d^64s^2$             | $3d^6(^1G_2)4s4p(^3P^o)$ | [2]       |
| 490 | 276.752         | 404              | 276.74151             | Fe II | $3d^6(^5D)4p$          | $3d^6(^5D)5s$            | [1]       |
|     |                 |                  | 276.74421             | Fe II | $3d^6(^1D_2)4p$        | $3d^54s(^5S)5s$          | [1]       |
|     |                 |                  | 276.7449              | Fe I  | $3d^7(^4P)4s$          | $3d^64s(^4D)5p$          | [2]       |
|     |                 |                  | 276.751209            | Fe II | $3d^6(^5D)4p$          | $3d^6(^5D)5s$            | [1]       |

| No. | Wavelength (nm) | Intensity (a.u.) | Wavelength (nm), Ref. | Type  | Lower energy level     | Higher energy level      | Reference |
|-----|-----------------|------------------|-----------------------|-------|------------------------|--------------------------|-----------|
|     |                 |                  | 276.7522              | Fe I  | $3d^7(^4F)4s$          | $3d^6(^3P_2)4s4p(^3P^o)$ | [4]       |
|     |                 |                  | 276.76312             | Fe II | $3d^5(^6S)4s4p(^1P^o)$ | $3d^54s(^5S)5s$          | [1]       |
| 491 | 276.824         | 154              | 276.81037             | Fe I  | $3d^7(^4F)4s$          | $3d^7(^4F)5p$            | [2]       |
|     |                 |                  | 276.82122             | Fe II | $3d^6(^3D)4p$          | $3d^6(^3G)4d$            | [1]       |
|     |                 |                  | 276.8268              | Fe II | $3d^54s^2$             | $3d^6(^5D)5p$            | [1]       |
|     |                 |                  | 276.83326             | Fe II | $3d^6(^3D)4s$          | $3d^6(^3D)4p$            | [1]       |
| 492 | 276.933         | 56               | 276.9298              | Fe I  | $3d^64s^2$             | $3d^6(^1G_2)4s4p(^3P^o)$ | [2]       |
|     |                 |                  | 276.93324             | Fe II | $3d^6(^3D)4s$          | $3d^6(^3D)4p$            | [1]       |
|     |                 |                  | 276.93556             | Fe II | $3d^6(^3G)4s$          | $3d^6(^3H)4p$            | [1]       |
| 493 | 277.209         | 373              | 277.20738             | Fe I  | $3d^7(^4F)4s$          | $3d^6(^3H)4s4p(^3P^o)$   | [2]       |
|     |                 |                  | 277.211               | Fe I  | $3d^64s^2$             | $3d^6(^5D)4s4p(^1P^o)$   | [2]       |
|     |                 |                  | 277.2122              | Fe II | $3d^6(^3D)4p$          | $3d^6(^3F_2)4d$          | [1]       |
| 494 | 277.257         | 65               | 277.25084             | Fe I  | $3d^7(^4P)4s$          | $3d^7(^4F)5p$            | [2]       |
|     |                 |                  | 277.2538              | Fe II | $3d^6(^3D)4p$          | $3d^6(^3G)4d$            | [1]       |
| 495 | 277.474         | 28               | 277.46858             | Fe II | $3d^6(^3P_2)4s$        | $3d^6(^3P_2)4p$          | [1]       |
|     |                 |                  | 277.47297             | Fe I  | $3d^7(^4F)4s$          | $3d^6(^3P_2)4s4p(^3P^o)$ | [2]       |
|     |                 |                  | 277.4889              | Fe II | $3d^54s^2$             | $3d^6(^5D)5p$            | [1]       |
| 496 | 277.498         | 50               | 277.4889              | Fe II | $3d^54s^2$             | $3d^6(^5D)5p$            | [1]       |
|     |                 |                  | 277.49377             | Fe I  | $3d^6(^5D)4s4p(^3P^o)$ | $3d^6(^5D)4p^2(^3P)$     | [2]       |
|     |                 |                  | 277.5055              | Fe I  | $3d^6(^5D)4s4p(^3P^o)$ | $3d^64s(^6D_{9/2})6d$    | [2]       |
| 497 | 277.714         | 26               | 277.7266              | Fe I  | $3d^7(^4P)4s$          | $3d^6(^3D)4s4p(^3P^o)$   | [2]       |
|     |                 |                  | 277.7266              | Fe II | $3d^6(^3G)4p$          | $3d^6(^3G)5s$            | [1]       |
| 498 | 277.823         | 463              | 277.82201             | Fe I  | $3d^7(^4F)4s$          | $3d^6(^3H)4s4p(^3P^o)$   | [2]       |
|     |                 |                  | 277.82933             | Fe II | $3d^6(^3G)4p$          | $3d^6(^3G)5s$            | [1]       |
| 499 | 277.883         | 44               | 277.87                | Fe II | $3d^6(^3G)4p$          | $3d^54s(^7S)4d$          | [1]       |
|     |                 |                  | 277.8753              | Fe I  | $3d^64s^2$             | $3d^6(^3F_2)4s4p(^1P^o)$ | [2]       |
|     |                 |                  | 277.88421             | Fe I  | $3d^7(^4F)4s$          | $3d^6(^3H)4s4p(^3P^o)$   | [2]       |
|     |                 |                  | 277.8928              | Fe I  | $3d^7(^2G)4s$          | $3d^6(^3H)4s4p(^1P^o)$   | [2]       |
| 500 | 278.364         | 123              | 278.35496             | Fe I  | $3d^7(^4F)4s$          | $3d^6(^3G)4s4p(^3P^o)$   | [2]       |
|     |                 |                  | 278.36904             | Fe II | $3d^6(^3H)4s$          | $3d^6(^3H)4p$            | [1]       |
| 501 | 278.52          | 94               | 278.5132              | Fe I  | $3d^64s^2$             | $3d^64s(^6D)6p$          | [2]       |
|     |                 |                  | 278.5192              | Fe II | $3d^6(^5D)4p$          | $3d^6(^5D)5s$            | [1]       |
|     |                 |                  | 278.5349              | Fe I  | $3d^7(^2G)4s$          | $3d^6(^3F_2)4s4p(^1P^o)$ | [2]       |
| 502 | 278.809         | 8372             | 278.79578             | Fe I  | $3d^7(^4F)4s$          | $3d^6(^3F_2)4s4p(^3P^o)$ | [2]       |
|     |                 |                  | 278.81047             | Fe I  | $3d^7(^4F)4s$          | $3d^6(^3H)4s4p(^3P^o)$   | [2]       |
|     |                 |                  | 278.8236              | Fe II | $3d^6(^3D)4p$          | $3d^6(^3G)4d$            | [1]       |

| No. | Wavelength (nm) | Intensity (a.u.) | Wavelength (nm), Ref. | Type  | Lower energy level     | Higher energy level     | Reference |
|-----|-----------------|------------------|-----------------------|-------|------------------------|-------------------------|-----------|
| 503 | 279.157         | 32               | 279.1504              | Fe I  | $3d^6(^5D)4s4p(^3P^o)$ | $3d^6(^5D)4p(^3P)$      | [2]       |
|     |                 |                  | 279.159               | Fe I  | $3d^6(^5D)4s4p(^3P^o)$ | $3d^64s(^4D)4d$         | [2]       |
|     |                 |                  | 279.1644              | Fe II | $3d^54s^2$             | $3d^6(^5D)5p$           | [1]       |
| 504 | 279.205         | 249              | 279.2054              | Fe II | $3d^6(^3H)4s$          | $3d^6(^3F2)4p$          | [1]       |
|     |                 |                  | 279.2126              | Fe II | $3d^6(^1G2)4p$         | $3d^6(^3G)4d$           | [1]       |
|     |                 |                  | 279.2126              | Fe II | $3d^6(^1D2)4p$         | $3d^6(^5D)6d$           | [1]       |
| 505 | 279.386         | 52               | 279.37871             | Fe II | $3d^6(^3F2)4p$         | $3d^6(^3F2)5s$          | [1]       |
|     |                 |                  | 279.37871             | Fe II | $3d^6(^3H)4p$          | $3d^6(^3H)5s$           | [1]       |
|     |                 |                  | 279.38872             | Fe II | $3d^6(^3G)4s$          | $3d^6(^3H)4p$           | [1]       |
|     |                 |                  | 279.39288             | Fe II | $3d^6(^3P2)4p$         | $3d^6(^3P2)5s$          | [1]       |
| 506 | 279.482         | 265              | 279.47019             | Fe I  | $3d^7(^4F)4s$          | $3d^6(^3P2)4s4p(^3P^o)$ | [2]       |
|     |                 |                  | 279.4852              | Fe I  | $3d^7(^4P)4s$          | $3d^6(^3D)4s4p(^3P^o)$  | [2]       |
| 507 | 279.518         | 73               | 279.5093              | Fe II | $3d^6(^1D2)4p$         | $3d^6(^5D)6d$           | [1]       |
|     |                 |                  | 279.5149              | Fe I  | $3d^6(^5D)4s4p(^3P^o)$ | $3d^64s(^6D)7s$         | [2]       |
|     |                 |                  | 279.5268              | Fe I  | $3d^6(^5D)4s4p(^3P^o)$ | $3d^64s(^6D_{7/2})6d$   | [2]       |
| 508 | 279.686         | 30               | 279.6813              | Fe II | $3d^6(^3G)4s$          | $3d^6(^3P2)4p$          | [1]       |
|     |                 |                  | 279.68674             | Fe I  | $3d^7(^4F)4s$          | $3d^7(^4P)4p$           | [2]       |
| 509 | 279.782         | 151              | 279.77751             | Fe I  | $3d^7(^4F)4s$          | $3d^6(^3H)4s4p(^3P^o)$  | [2]       |
|     |                 |                  | 279.79166             | Fe II | $3d^6(^3H)4s$          | $3d^6(^3H)4p$           | [1]       |
| 510 | 279.903         | 40               | 279.8967              | Fe I  | $3d^7(^4F)4s$          | $3d^6(^3G)4s4p(^3P^o)$  | [2]       |
|     |                 |                  | 279.90044             | Fe II | $3d^6(^1I)4p$          | $3d^6(^3G)4d$           | [1]       |
|     |                 |                  | 279.91457             | Fe II | $3d^6(^3D)4p$          | $3d^6(^3G)4d$           | [1]       |
|     |                 |                  | 279.91467             | Fe I  | $3d^7(^4F)4s$          | $3d^6(^3H)4s4p(^3P^o)$  | [2]       |
| 511 | 279.999         | 30               | 279.98401             | Fe I  | $3d^6(^5D)4s4p(^3P^o)$ | $3d^64s(^6D_{5/2})6d$   | [2]       |
|     |                 |                  | 279.9969              | Fe II | $3d^6(^3G)4p$          | $3d^6(^3H)4d$           | [1]       |
| 512 | 280.695         | 1796             | 280.6846              | Fe II | $3d^54s^2$             | $3d^6(^3F1)4p$          | [1]       |
|     |                 |                  | 280.6984              | Fe I  | $3d^7(^4F)4s$          | $3d^6(^3H)4s4p(^3P^o)$  | [2]       |
| 513 | 280.838         | 34               | 280.83268             | Fe I  | $3d^7(^4F)4s$          | $3d^6(^3H)4s4p(^3P^o)$  | [2]       |
|     |                 |                  | 280.8355              | Fe I  | $3d^64s^2$             | $3d^6(^3D)4s4p(^3P^o)$  | [2]       |
| 514 | 281.197         | 27               | 281.1859              | Fe I  | $3d^64s^2$             | $3d^7(^4F_{5/2})4f$     | [2]       |
|     |                 |                  | 281.1906              | Fe I  | $3d^64s^2$             | $3d^7(^4F_{5/2})4f$     | [2]       |
|     |                 |                  | 281.20401             | Fe I  | $3d^7(^2G)4s$          | $3d^6(^3D)4s4p(^3P^o)$  | [2]       |
| 515 | 281.556         | 46               | 281.55064             | Fe I  | $3d^7(^4F)4s$          | $3d^6(^3G)4s4p(^3P^o)$  | [2]       |
|     |                 |                  | 281.56152             | Fe I  | $3d^6(^5D)4s4p(^3P^o)$ | $3d^64s(^6D_{9/2})6d$   | [2]       |
| 516 | 281.676         | 34               | 281.6627              | Fe II | $3d^6(^3F2)4p$         | $3d^6(^3F2)5s$          | [1]       |
|     |                 |                  | 281.669               | Fe I  | $3d^7(^4P)4s$          | $3d^64s(^4D)5p$         | [2]       |

| No. | Wavelength (nm) | Intensity (a.u.) | Wavelength (nm), Ref. | Type  | Lower energy level     | Higher energy level    | Reference |
|-----|-----------------|------------------|-----------------------|-------|------------------------|------------------------|-----------|
| 517 | 282.083         | 24               | 282.06898             | Fe II | $3d^6(^3F_2)4p$        | $3d^6(^3P_2)5s$        | [1]       |
|     |                 |                  | 282.0814              | Fe I  | $3d^7(^2G)4s$          | $3d^64s(^6D_{5/2})4f$  | [2]       |
|     |                 |                  | 282.0815              | Fe II | $3d^54s^2$             | $3d^6(^3P_2)5p$        | [1]       |
|     |                 |                  | 282.0923              | Fe I  | $3d^6(^5D)4s4p(^3P^o)$ | $3d^64s(^6D)7s$        | [2]       |
|     |                 |                  | 282.0966              | Fe II | $3d^6(^5D)5s$          | $3d^6(^3G)5p$          | [1]       |
| 518 | 282.238         | 32               | 282.2262              | Fe I  | $3d^6(^5D)4s4p(^3P^o)$ | $3d^64s(^6D_{9/2})6d$  | [2]       |
|     |                 |                  | 282.2428              | Fe II | $3d^6(^1I)4p$          | $3d^6(^3G)4d$          | [1]       |
| 519 | 282.334         | 529              | 282.32755             | Fe I  | $3d^7(^4F)4s$          | $3d^6(^3H)4s4p(^3P^o)$ | [2]       |
|     |                 |                  | 282.33279             | Fe II | $3d^6(^3G)4s$          | $3d^6(^3H)4p$          | [1]       |
| 520 | 282.561         | 1360             | 282.5476              | Fe II | $3d^6(^3P_2)4p$        | $3d^6(^3P_2)5s$        | [1]       |
|     |                 |                  | 282.55555             | Fe I  | $3d^7(^4F)4s$          | $3d^6(^3H)4s4p(^3P^o)$ | [2]       |
|     |                 |                  | 282.56873             | Fe I  | $3d^64s^2$             | $3d^7(^4F)4p$          | [2]       |
|     |                 |                  | 282.5745              | Fe II | $3d^6(^3G)4s$          | $3d^6(^3H)4p$          | [1]       |
| 521 | 282.657         | 28               | 282.64964             | Fe I  | $3d^7(^4F)4s$          | $3d^6(^3G)4s4p(^3P^o)$ | [2]       |
|     |                 |                  | 282.6584              | Fe II | $3d^6(^3P_1)4p$        | $3d^6(^3H)6s$          | [1]       |
| 522 | 282.789         | 25               | 282.78918             | Fe I  | $3d^64s^2$             | $3d^7(^4F)4p$          | [2]       |
|     |                 |                  | 282.7894              | Fe I  | $3d^6(^5D)4s4p(^3P^o)$ | $3d^6(^5D)4s(^4D)4d$   | [2]       |
| 523 | 282.884         | 150              | 282.8808              | Fe I  | $3d^7(^4F)4s$          | $3d^6(^3H)4s4p(^3P^o)$ | [2]       |
|     |                 |                  | 282.8946              | Fe II | $3d^5(^6S)4s4p(^1P^o)$ | $3d^6(^5D)6d$          | [1]       |
| 524 | 282.944         | 39               | 282.9365              | Fe I  | $3d^6(^5D)4s4p(^3P^o)$ | $3d^64s(^6D_{7/2})6d$  | [2]       |
|     |                 |                  | 282.9365              | Fe I  | $3d^64s^2$             | $3d^7(^4F_{5/2})4f$    | [2]       |
| 525 | 283.1           | 32               | 283.0924              | Fe I  | $3d^6(^5D)4s4p(^3P^o)$ | $3d^64s(^6D_{5/2})6d$  | [2]       |
|     |                 |                  | 283.0924              | Fe II | $3d^6(^3G)4s$          | $3d^6(^3G)4p$          | [1]       |
|     |                 |                  | 283.1088              | Fe II | $3d^6(^3P_2)4s$        | $3d^6(^3F_2)4p$        | [1]       |
| 526 | 283.243         | 2640             | 283.24047             | Fe II | $3d^54s^2$             | $3d^6(^3P_2)5p$        | [1]       |
|     |                 |                  | 283.24353             | Fe I  | $3d^7(^4F)4s$          | $3d^6(^3H)4s4p(^3P^o)$ | [2]       |
| 527 | 283.303         | 24               | 283.3013              | Fe I  | $3d^6(^5D)4s4p(^3P^o)$ | $3d^64s(^6D)7s$        | [2]       |
|     |                 |                  | 283.30852             | Fe II | $3d^6(^5D)4p$          | $3d^6(^5D)5s$          | [1]       |
| 528 | 283.434         | 23               | 283.4417              | Fe I  | $3d^7(^4F)4s$          | $3d^6(^3G)4s4p(^3P^o)$ | [2]       |
|     |                 |                  | 283.4417              | Fe I  | $3d^7(^4F)4s$          | $3d^6(^3G)4s4p(^3P^o)$ | [2]       |
| 529 | 283.817         | 342              | 283.81193             | Fe I  | $3d^7(^4F)4s$          | $3d^6(^3H)4s4p(^3P^o)$ | [2]       |
|     |                 |                  | 283.82151             | Fe II | $3d^6(^5D)4p$          | $3d^6(^5D)5s$          | [1]       |
|     |                 |                  | 283.8232              | Fe II | $3d^6(^3G)4p$          | $3d^6(^5D)5d$          | [1]       |
| 530 | 283.985         | 54               | 283.97994             | Fe II | $3d^6(^5D)4p$          | $3d^6(^5D)5s$          | [1]       |
|     |                 |                  | 283.99759             | Fe I  | $3d^6(^5D)4s4p(^3P^o)$ | $3d^64s(^6D)7s$        | [2]       |
| 531 | 284.068         | 61               | 284.064951            | Fe II | $3d^6(^3P_2)4s$        | $3d^6(^3P_2)4p$        | [1]       |

| No. | Wavelength (nm) | Intensity (a.u.) | Wavelength (nm), Ref. | Type  | Lower energy level     | Higher energy level     | Reference |
|-----|-----------------|------------------|-----------------------|-------|------------------------|-------------------------|-----------|
|     |                 |                  | 284.0758              | Fe II | $3d^6(^3G)4s$          | $3d^6(^3G)4p$           | [1]       |
| 532 | 284.367         | 524              | 284.3624              | Fe I  | $3d^6(^5D)4s4p(^3P^o)$ | $3d^6(^5D)4s(^4D)4d$    | [2]       |
|     |                 |                  | 284.36306             | Fe I  | $3d^7(^4F)4s$          | $3d^6(^3P2)4s4p(^3P^o)$ | [2]       |
|     |                 |                  | 284.37813             | Fe II | $3d^6(^3D)4p$          | $3d^6(^3D)5s$           | [1]       |
|     |                 |                  | 284.37957             | Fe I  | $3d^64s^2$             | $3d^7(^4F)5p$           | [2]       |
| 533 | 284.403         | 2040             | 284.3921              | Fe I  | $3d^64s^2$             | $3d^7(^4F)4p$           | [2]       |
|     |                 |                  | 284.39214             | Fe II | $3d^6(^3P2)4p$         | $3d^6(^3P2)5s$          | [1]       |
|     |                 |                  | 284.39762             | Fe I  | $3d^7(^4F)4s$          | $3d^6(^3H)4s4p(^3P^o)$  | [2]       |
|     |                 |                  | 284.4094              | Fe II | $3d^6(^1D2)4p$         | $3d^6(^5D)6d$           | [1]       |
|     |                 |                  | 284.4141              | Fe I  | $3d^64s^2$             | $3d^6(^1G2)4s4p(^3P^o)$ | [2]       |
| 534 | 284.558         | 189              | 284.5485              | Fe II | $3d^6(^3D)4p$          | $3d^6(^5D)5d$           | [1]       |
|     |                 |                  | 284.55474             | Fe I  | $3d^7(^4F)4s$          | $3d^6(^3G)4s4p(^3P^o)$  | [2]       |
|     |                 |                  | 284.55679             | Fe II | $3d^6(^1D2)4p$         | $3d^6(^3D)4d$           | [1]       |
|     |                 |                  | 284.559447            | Fe II | $3d^6(^5D)4p$          | $3d^6(^5D)5s$           | [1]       |
|     |                 |                  | 284.55945             | Fe I  | $3d^7(^4F)4s$          | $3d^6(^3P2)4s4p(^3P^o)$ | [2]       |
|     |                 |                  | 284.57131             | Fe I  | $3d^7(^4F)4s$          | $3d^6(^3H)4s4p(^3P^o)$  | [2]       |
| 535 | 284.774         | 38               | 284.7699              | Fe II | $3d^6(^3D)4s$          | $3d^6(^3G)4p$           | [1]       |
|     |                 |                  | 284.77733             | Fe II | $3d^6(^5D)4p$          | $3d^6(^5D)5s$           | [1]       |
|     |                 |                  | 284.78833             | Fe II | $3d^6(^3D)4p$          | $3d^6(^3D)5s$           | [1]       |
| 536 | 284.81          | 48               | 284.80517             | Fe II | $3d^6(^3G)4s$          | $3d^6(^3H)4p$           | [1]       |
|     |                 |                  | 284.80683             | Fe II | $3d^6(^3D)4p$          | $3d^6(^5D)5d$           | [1]       |
|     |                 |                  | 284.81061             | Fe II | $3d^6(^5D)4p$          | $3d^6(^5D)5s$           | [1]       |
|     |                 |                  | 284.8231              | Fe II | $3d^6(^5D)5s$          | $3d^6(^5D_3)5f$         | [1]       |
| 537 | 284.833         | 33               | 284.8231              | Fe II | $3d^6(^5D)5s$          | $3d^6(^5D_3)5f$         | [1]       |
|     |                 |                  | 284.83197             | Fe II | $3d^6(^5D)4p$          | $3d^6(^5D)5s$           | [1]       |
| 538 | 284.869         | 44               | 284.8627              | Fe I  | $3d^7(^2G)4s$          | $3d^64s(^6D)6p$         | [2]       |
|     |                 |                  | 284.87145             | Fe I  | $3d^7(^4F)4s$          | $3d^6(^3P2)4s4p(^3P^o)$ | [2]       |
| 539 | 285.18          | 1650             | 285.17212             | Fe II | $3d^6(^5D)4p$          | $3d^6(^5D)5s$           | [1]       |
|     |                 |                  | 285.17967             | Fe I  | $3d^7(^4F)4s$          | $3d^6(^3H)4s4p(^3P^o)$  | [2]       |
| 540 | 285.383         | 153              | 285.36838             | Fe I  | $3d^7(^4F)4s$          | $3d^6(^3H)4s4p(^3P^o)$  | [2]       |
|     |                 |                  | 285.37715             | Fe I  | $3d^64s^2$             | $3d^6(^1G2)4s4p(^3P^o)$ | [2]       |
| 541 | 285.718         | 23               | 285.71216             | Fe II | $3d^6(^3P2)4p$         | $3d^6(^3F2)5s$          | [1]       |
|     |                 |                  | 285.71722             | Fe II | $3d^6(^3D)4s$          | $3d^6(^3G)4p$           | [1]       |
| 542 | 285.802         | 24               | 285.79928             | Fe I  | $3d^64s^2$             | $3d^6(^3G)4s4p(^3P^o)$  | [2]       |
|     |                 |                  | 285.80892             | Fe I  | $3d^64s^2$             | $3d^7(^4F)5p$           | [2]       |
| 543 | 285.838         | 37               | 285.834007            | Fe II | $3d^6(^3G)4s$          | $3d^6(^3H)4p$           | [1]       |

| No. | Wavelength (nm) | Intensity (a.u.) | Wavelength (nm), Ref. | Type  | Lower energy level     | Higher energy level      | Reference |
|-----|-----------------|------------------|-----------------------|-------|------------------------|--------------------------|-----------|
|     |                 |                  | 285.8525              | Fe II | $3d^6(^1D_2)4s$        | $3d^6(^3D)4p$            | [1]       |
| 544 | 286.483         | 25               | 286.4741              | Fe II | $3d^6(^3D)4p$          | $3d^6(^5D)5d$            | [1]       |
|     |                 |                  | 286.497               | Fe II | $3d^6(^3D)4s$          | $3d^6(^3G)4p$            | [1]       |
| 545 | 286.937         | 90               | 286.92281             | Fe I  | $3d^6(^5D)4s4p(^3P^o)$ | $3d^6(^5D)4s(^6D)6s$     | [2]       |
|     |                 |                  | 286.93076             | Fe I  | $3d^64s^2$             | $3d^7(^4F)4p$            | [2]       |
|     |                 |                  | 286.9313              | Fe II | $3d^6(^5D)4p$          | $3d^6(^5D)5s$            | [7]       |
| 546 | 286.985         | 44               | 286.9701              | Fe II | $3d^6(^3F_2)4s$        | $3d^6(^3F_2)4p$          | [1]       |
|     |                 |                  | 286.9701              | Fe II | $3d^54s^2$             | $3d^5(^4G)4s4p(^3P^o)$   | [1]       |
|     |                 |                  | 286.98251             | Fe I  | $3d^6(^5D)4s4p(^3P^o)$ | $3d^6(^5D)4s(^6D)6s$     | [2]       |
| 547 | 287.236         | 96               | 287.226               | Fe II | $3d^6(^5D)4p$          | $3d^6(^5D)5s$            | [1]       |
|     |                 |                  | 287.23337             | Fe I  | $3d^7(^4F)4s$          | $3d^6(^3P_2)4s4p(^3P^o)$ | [2]       |
|     |                 |                  | 287.2385              | Fe II | $3d^6(^3H)4s$          | $3d^6(^3H)4p$            | [1]       |
|     |                 |                  | 287.24984             | Fe I  | $3d^7(^4P)4s$          | $3d^6(^3D)4s4p(^3P^o)$   | [2]       |
| 548 | 287.284         | 32               | 287.2802              | Fe I  | $3d^6(^5D)4s4p(^3P^o)$ | $3d^64s(^4D)4d$          | [2]       |
|     |                 |                  | 287.2983              | Fe II | $3d^54s^2$             | $3d^6(^5D_3)5f$          | [1]       |
| 549 | 287.344         |                  | 287.339737            | Fe II | $3d^6(^3G)4s$          | $3d^6(^3H)4p$            | [1]       |
|     |                 |                  | 287.35198             | Fe I  | $3d^64s^2$             | $3d^7(^4F)5p$            | [2]       |
| 550 | 287.535         | 29               | 287.5249              | Fe I  | $3d^64s^2$             | $3d^7(^4F)5p$            | [2]       |
|     |                 |                  | 287.5301              | Fe I  | $3d^6(^5D)4s4p(^3P^o)$ | $3d^64s(^6D)7s$          | [2]       |
|     |                 |                  | 287.5302              | Fe I  | $3d^7(^4F)4s$          | $3d^7(^4P)4p$            | [2]       |
|     |                 |                  | 287.53474             | Fe II | $3d^6(^3F_2)4s$        | $3d^6(^3H)4p$            | [1]       |
|     |                 |                  | 287.5478              | Fe I  | $3d^64s^2$             | $3d^64s(^4D)5p$          | [2]       |
| 551 | 287.642         | 35               | 287.64                | Fe I  | $3d^7(^4P)4s$          | $3d^7(^2D_2)4p$          | [2]       |
|     |                 |                  | 287.65536             | Fe II | $3d^6(^3D)4p$          | $3d^6(^5D)5d$            | [1]       |
| 552 | 287.738         | 55               | 287.73005             | Fe I  | $3d^7(^4F)4s$          | $3d^7(^4P)4p$            | [2]       |
|     |                 |                  | 287.7433              | Fe II | $3d^54s^2$             | $3d^5(^4D)4s4p(^3P^o)$   | [1]       |
| 553 | 288.419         | 22               | 288.4101              | Fe II | $3d^6(^1G_2)4p$        | $3d^6(^3F_2)4d$          | [1]       |
|     |                 |                  | 288.4185              | Fe II | $3d^6(^3D)4p$          | $3d^6(^3F_2)4d$          | [1]       |
|     |                 |                  | 288.42694             | Fe II | $3d^6(^1I)4p$          | $3d^6(^1I)5s$            | [1]       |
| 554 | 288.527         |                  | 288.53464             | Fe I  | $3d^6(^5D)4s4p(^3P^o)$ | $3d^6(^5D)4s(^6D)6s$     | [2]       |
|     |                 |                  | 288.53464             | Fe I  | $3d^6(^5D)4s4p(^3P^o)$ | $3d^64s(^4D)4d$          | [2]       |
| 555 | 288.718         | 27               | 288.7143              | Fe I  | $3d^7(^2P)4s$          | $3d^64s(^4D)5p$          | [2]       |
|     |                 |                  | 288.7227              | Fe II | $3d^5(^6S)4s4p(^1P^o)$ | $3d^6(^5D)6d$            | [1]       |
|     |                 |                  | 288.7313              | Fe II | $3d^6(^3F_2)4s$        | $3d^6(^3F_2)4p$          | [1]       |
|     |                 |                  | 288.7313              | Fe II | $3d^6(^5D)4p$          | $3d^54s^2$               | [1]       |
| 556 | 288.754         | 24               | 288.7538              | Fe I  | $3d^6(^5D)4s4p(^3P^o)$ | $3d^6(^5D)4s(^4D)4d$     | [2]       |

| No. | Wavelength (nm) | Intensity (a.u.) | Wavelength (nm), Ref. | Type  | Lower energy level     | Higher energy level      | Reference |
|-----|-----------------|------------------|-----------------------|-------|------------------------|--------------------------|-----------|
|     |                 |                  | 288.7648              | Fe II | $3d^6(^3F_2)4p$        | $3d^6(^3H)5s$            | [1]       |
| 557 | 289.136         | 120              | 289.1239              | Fe II | $3d^5(^6S)4s4p(^1P^o)$ | $3d^6(^3D)4d$            | [1]       |
|     |                 |                  | 289.1404              | Fe I  | $3d^7(^4F)4s$          | $3d^7(^4P)4p$            | [2]       |
| 558 | 289.506         | 66               | 289.4957              | Fe I  | $3d^7(^2D_2)4s$        | $3d^6(^3H)4s4p(^1P^o)$   | [2]       |
|     |                 |                  | 289.50346             | Fe I  | $3d^7(^4F)4s$          | $3d^6(^3F_2)4s4p(^3P^o)$ | [2]       |
|     |                 |                  | 289.5098              | Fe II | $3d^6(^3F_2)4s$        | $3d^6(^3F_2)4p$          | [1]       |
| 559 | 289.745         | 63               | 289.7457              | Fe I  | $3d^6(^5D)4s4p(^3P^o)$ | $3d^64s(^6D)7s$          | [2]       |
|     |                 |                  | 289.75872             | Fe II | $3d^6(^3G)4p$          | $3d^6(^3P_2)4d$          | [1]       |
| 560 | 290.079         | 32               | 290.06555             | Fe II | $3d^6(^3D)4p$          | $3d^6(^3G)4d$            | [1]       |
|     |                 |                  | 290.0768              | Fe II | $3d^6(^3F_2)4p$        | $3d^6(^3F_2)5s$          | [1]       |
|     |                 |                  | 290.0938              | Fe I  | $3d^6(^5D)4s4p(^3P^o)$ | $3d^64s(^6D)5d$          | [2]       |
| 561 | 290.139         | 26               | 290.13805             | Fe I  | $3d^7(^4F)4s$          | $3d^7(^4P)4p$            | [2]       |
|     |                 |                  | 290.1473              | Fe II | $3d^6(^3H)4s$          | $3d^6(^3H)4p$            | [1]       |
|     |                 |                  | 290.1537              | Fe II | $3d^6(^3H)4s$          | $3d^6(^3H)4p$            | [1]       |
| 562 | 290.187         | 43               | 290.1805              | Fe I  | $3d^7(^4F)4s$          | $3d^6(^3P_2)4s4p(^3P^o)$ | [2]       |
|     |                 |                  | 290.19102             | Fe I  | $3d^6(^5D)4s4p(^3P^o)$ | $3d^6(^5D)4s(^6D)6s$     | [2]       |
|     |                 |                  | 290.1975              | Fe I  | $3d^64s^2$             | $3d^6(^3G)4s4p(^3P^o)$   | [2]       |
| 563 | 290.27          | 35               | 290.2615              | Fe I  | $3d^6(^5D)4s4p(^3P^o)$ | $3d^64s(^6D)5d$          | [2]       |
|     |                 |                  | 290.2778              | Fe II | $3d^54s^2$             | $3d^5(^4P)4s4p(^3P^o)$   | [1]       |
| 564 | 290.569         | 20               | 290.5571              | Fe I  | $3d^7(^2H)4s$          | $3d^6(^3H)4s4p(^1P^o)$   | [2]       |
|     |                 |                  | 290.57438             | Fe II | $3d^6(^3F_2)4p$        | $3d^6(^3H)5s$            | [1]       |
| 565 | 290.76          | 28               | 290.75172             | Fe I  | $3d^7(^2G)4s$          | $3d^6(^4I)4s4p(^3P^o)$   | [2]       |
|     |                 |                  | 290.7629              | Fe II | $3d^54s^2$             | $3d^5(^4P)4s4p(^3P^o)$   | [1]       |
| 566 | 291.214         | 243              | 291.21571             | Fe I  | $3d^64s^2$             | $3d^7(^4F)4p$            | [2]       |
|     |                 |                  | 291.22565             | Fe I  | $3d^7(^4F)4s$          | $3d^7(^4P)4p$            | [2]       |
|     |                 |                  | 291.2273              | Fe I  | $3d^6(^5D)4s4p(^3P^o)$ | $3d^64s(^6D)5d$          | [2]       |
| 567 | 291.787         | 227              | 291.78334             | Fe II | $3d^6(^3P_2)4p$        | $3d^6(^3P_2)5s$          | [1]       |
|     |                 |                  | 291.7872              | Fe I  | $3d^64s^2$             | $3d^6(^3H)4s4p(^1P^o)$   | [2]       |
| 568 | 291.811         | 65               | 291.80246             | Fe I  | $3d^7(^2H)4s$          | $3d^6(^3H)4s4p(^1P^o)$   | [2]       |
|     |                 |                  | 291.81588             | Fe I  | $3d^6(^5D)4s4p(^3P^o)$ | $3d^64s(^6D)5d$          | [2]       |
| 569 | 291.99          | 42               | 291.98403             | Fe I  | $3d^6(^5D)4s4p(^3P^o)$ | $3d^6(^5D)4s(^6D)6s$     | [2]       |
|     |                 |                  | 291.9993              | Fe II | $3d^54s^2$             | $3d^5(^2D_3)4s4p(^3P^o)$ | [1]       |
| 570 | 292.073         | 45               | 292.0623              | Fe I  | $3d^64s^2$             | $3d^7(^4F)5p$            | [2]       |
|     |                 |                  | 292.06904             | Fe I  | $3d^7(^4F)4s$          | $3d^6(^3F_2)4s4p(^3P^o)$ | [2]       |
| 571 | 292.157         | 37               | 292.1602              | Fe I  | $3d^7(^4P)4s$          | $3d^6(^5D)4s(^6D)5p$     | [2]       |
|     |                 |                  | 292.1715              | Fe I  | $3d^64s^2$             | $3d^6(^3D)4s4p(^3P^o)$   | [2]       |

| No. | Wavelength (nm) | Intensity (a.u.) | Wavelength (nm), Ref. | Type  | Lower energy level           | Higher energy level          | Reference |
|-----|-----------------|------------------|-----------------------|-------|------------------------------|------------------------------|-----------|
| 572 | 292.336         | 65               | 292.32854             | Fe I  | $3d^7(^2H)4s$                | $3d^6(^3H)4s4p(^1P^{\circ})$ | [2]       |
|     |                 |                  | 292.3389              | Fe I  | $3d^64s^2$                   | $3d^6(^3G)4s4p(^3P^{\circ})$ | [2]       |
|     |                 |                  | 292.343               | Fe I  | $3d^64s^2$                   | $3d^7(^4F)5p$                | [2]       |
|     |                 |                  | 292.34305             | Fe I  | $3d^6(^5D)4s4p(^3P^{\circ})$ | $3d^64s(^6D)5d$              | [2]       |
|     |                 |                  | 292.34305             | Fe II | $3d^5(^6S)4s4p(^1P^{\circ})$ | $3d^6(^5D)7s$                | [1]       |
| 573 | 292.575         | 34               | 292.5639              | Fe I  | $3d^64s^2$                   | $3d^6(^3D)4s4p(^3P^{\circ})$ | [2]       |
|     |                 |                  | 292.571               | Fe I  | $3d^64s^2$                   | $3d^6(^3G)4s4p(^3P^{\circ})$ | [2]       |
|     |                 |                  | 292.57843             | Fe I  | $3d^6(^5D)4s4p(^3P^{\circ})$ | $3d^64s(^6D)5d$              | [2]       |
|     |                 |                  | 292.58987             | Fe I  | $3d^7(^4F)4s$                | $3d^7(^4P)4p$                | [2]       |
| 574 | 292.658         | 29               | 292.6552              | Fe I  | $3d^7(^4F)4s$                | $3d^7(^4P)4p$                | [2]       |
|     |                 |                  | 292.658524            | Fe II | $3d^6(^5D)4s$                | $3d^6(^5D)4p$                | [1]       |
|     |                 |                  | 292.66151             | Fe I  | $3d^6(^5D)4s4p(^3P^{\circ})$ | $3d^64s(^6D)5d$              | [2]       |
|     |                 |                  | 292.6694              | Fe I  | $3d^6(^5D)4s4p(^3P^{\circ})$ | $3d^64s(^6D)5d$              | [2]       |
| 575 | 292.909         | 457              | 292.90069             | Fe I  | $3d^64s^2$                   | $3d^7(^4F)4p$                | [2]       |
|     |                 |                  | 292.91082             | Fe I  | $3d^6(^5D)4s4p(^3P^{\circ})$ | $3d^64s(^6D)5d$              | [2]       |
|     |                 |                  | 292.9117              | Fe I  | $3d^7(^2H)4s$                | $3d^6(^3H)4s4p(^1P^{\circ})$ | [2]       |
|     |                 |                  | 292.92379             | Fe I  | $3d^6(^5D)4s4p(^3P^{\circ})$ | $3d^64s(^6D)5d$              | [2]       |
| 576 | 293.697         | 4948             | 293.69032             | Fe I  | $3d^64s^2$                   | $3d^7(^4F)4p$                | [2]       |
|     |                 |                  | 293.7065              | Fe II | $3d^54s^2$                   | $3d^6(^5D)6p$                | [1]       |
| 577 | 293.924         | 124              | 293.9125              | Fe II | $3d^7$                       | $3d^6(^3G)4p$                | [1]       |
|     |                 |                  | 293.9357              | Fe II | $3d^6(^1G_2)4p$              | $3d^6(^5D)5d$                | [1]       |
| 578 | 294.067         | 34               | 294.05875             | Fe I  | $3d^6(^5D)4s4p(^3P^{\circ})$ | $3d^64s(^6D)5d$              | [2]       |
|     |                 |                  | 294.06221             | Fe I  | $3d^64s^2$                   | $3d^7(^4F)5p$                | [2]       |
| 579 | 294.138         | 164              | 294.12346             | Fe I  | $3d^64s^2$                   | $3d^7(^4F)5p$                | [2]       |
|     |                 |                  | 294.127               | Fe I  | $3d^6(^5D)4s4p(^3P^{\circ})$ | $3d^64s(^6D)5d$              | [2]       |
|     |                 |                  | 294.13425             | Fe I  | $3d^64s^2$                   | $3d^7(^4F)4p$                | [2]       |
|     |                 |                  | 294.1478              | Fe II | $3d^6(^3D)4p$                | $3d^6(^3G)4d$                | [1]       |
|     |                 |                  | 294.1523              | Fe I  | $3d^6(^5D)4s4p(^3P^{\circ})$ | $3d^6(^3D)4s(^4D)4d$         | [2]       |
| 580 | 294.508         | 33               | 294.50514             | Fe I  | $3d^64s^2$                   | $3d^6(^3D)4s4p(^3P^{\circ})$ | [2]       |
|     |                 |                  | 294.50514             | Fe I  | $3d^6(^5D)4s4p(^3P^{\circ})$ | $3d^64s(^6D_{3/2})6d$        | [2]       |
|     |                 |                  | 294.5105              | Fe I  | $3d^6(^5D)4s4p(^3P^{\circ})$ | $3d^64s(^6D)5d$              | [2]       |
|     |                 |                  | 294.5223              | Fe I  | $3d^6(^5D)4s4p(^3P^{\circ})$ | $3d^64s(^6D)5d$              | [2]       |
| 581 | 294.735         | 70               | 294.7253              | Fe I  | $3d^7(^4F)4s$                | $3d^7(^4P)4p$                | [2]       |
|     |                 |                  | 294.7361              | Fe I  | $3d^6(^5D)4s4p(^3P^{\circ})$ | $3d^64s(^6D)5d$              | [2]       |
|     |                 |                  | 294.73618             | Fe I  | $3d^64s^2$                   | $3d^7(^2P)4p$                | [2]       |
| 582 | 294.842         | 63               | 294.8275              | Fe II | $3d^6(^1G_2)4p$              | $3d^6(^3F_2)4d$              | [1]       |



| No. | Wavelength (nm) | Intensity (a.u.) | Wavelength (nm), Ref. | Type  | Lower energy level     | Higher energy level      | Reference |
|-----|-----------------|------------------|-----------------------|-------|------------------------|--------------------------|-----------|
|     |                 |                  | 294.84334             | Fe I  | $3d^7(^2G)4s$          | $3d^6(^1G_2)4s4p(^3P^o)$ | [2]       |
|     |                 |                  | 294.8558              | Fe II | $3d^5(^6S)4s4p(^1P^o)$ | $3d^6(^5D)7s$            | [1]       |
| 583 | 295.391         | 2361             | 295.377401            | Fe II | $3d^6(^5D)4s$          | $3d^6(^5D)4p$            | [1]       |
|     |                 |                  | 295.39398             | Fe I  | $3d^64s^2$             | $3d^7(^4F)4p$            | [2]       |
|     |                 |                  | 295.4056              | Fe II | $3d^6(^3F_2)4s$        | $3d^6(^3H)4p$            | [1]       |
| 584 | 295.737         | 1096             | 295.73643             | Fe I  | $3d^64s^2$             | $3d^7(^4F)4p$            | [2]       |
|     |                 |                  | 295.74844             | Fe I  | $3d^64s^2$             | $3d^7(^2P)4p$            | [2]       |
| 585 | 295.976         | 65               | 295.968               | Fe I  | $3d^6(^5D)4s4p(^3P^o)$ | $3d^64s(^6D)5d$          | [2]       |
|     |                 |                  | 295.98347             | Fe II | $3d^6(^1F)4s$          | $3d^6(^1D_2)4p$          | [1]       |
| 586 | 296.524         | 624              | 296.52542             | Fe I  | $3d^7(^2G)4s$          | $3d^6(^1G_2)4s4p(^3P^o)$ | [2]       |
|     |                 |                  | 296.52542             | Fe I  | $3d^64s^2$             | $3d^7(^4F)4p$            | [2]       |
| 587 | 296.608         | 146              | 296.59664             | Fe II | $3d^6(^1G_2)4p$        | $3d^6(^3H)4d$            | [1]       |
|     |                 |                  | 296.59664             | Fe II | $3d^6(^5D)5s$          | $3d^6(^3G)5p$            | [1]       |
|     |                 |                  | 296.6076              | Fe I  | $3d^6(^5D)4s4p(^3P^o)$ | $3d^64s(^6D)5d$          | [2]       |
|     |                 |                  | 296.61972             | Fe I  | $3d^6(^5D)4s4p(^3P^o)$ | $3d^64s(^6D_{5/2})6d$    | [2]       |
|     |                 |                  | 296.61972             | Fe I  | $3d^64s^2$             | $3d^7(^2H)4p$            | [2]       |
| 588 | 296.691         | 33122            | 296.6898              | Fe I  | $3d^64s^2$             | $3d^7(^4F)4p$            | [2]       |
|     |                 |                  | 296.68984             | Fe I  | $3d^6(^5D)4s4p(^3P^o)$ | $3d^64s(^6D_{3/2})6d$    | [2]       |
| 589 | 296.942         | 502              | 296.9359              | Fe I  | $3d^64s^2$             | $3d^7(^4F)5p$            | [2]       |
|     |                 |                  | 296.93596             | Fe I  | $3d^64s^2$             | $3d^6(^5D)4s4p(^3P^o)$   | [2]       |
|     |                 |                  | 296.94744             | Fe I  | $3d^7(^4F)4s$          | $3d^6(^5D)4s4p(^1P^o)$   | [2]       |
| 590 | 297.013         | 3584             | 297.00992             | Fe I  | $3d^64s^2$             | $3d^7(^4F)4p$            | [2]       |
|     |                 |                  | 297.01058             | Fe I  | $3d^64s^2$             | $3d^6(^3D)4s4p(^3P^o)$   | [2]       |
|     |                 |                  | 297.01179             | Fe I  | $3d^64s^2$             | $3d^6(^5D)4s4p(^3P^o)$   | [2]       |
|     |                 |                  | 297.0245              | Fe II | $3d^6(^3D)4p$          | $3d^6(^5D)5d$            | [1]       |
| 591 | 297.228         | 55               | 297.22782             | Fe I  | $3d^7(^4P)4s$          | $3d^6(^5D)4s(^6D)5p$     | [2]       |
|     |                 |                  | 297.2416              | Fe I  | $3d^6(^1G_2)4p$        | $3d^6(^3F_2)4d$          | [2]       |
|     |                 |                  | 297.2416              | Fe II | $3d^6(^5D)4s4p(^3P^o)$ | $3d^64s(^6D_{7/2})6d$    | [2]       |
| 592 | 297.323         | 14970            | 297.31322             | Fe I  | $3d^64s^2$             | $3d^7(^4F)4p$            | [2]       |
|     |                 |                  | 297.32352             | Fe I  | $3d^64s^2$             | $3d^7(^4F)4p$            | [2]       |
| 593 | 297.478         | 149              | 297.47776             | Fe I  | $3d^6(^5D)4s4p(^3P^o)$ | $3d^64s(^6D)5d$          | [2]       |
|     |                 |                  | 297.47776             | Fe I  | $3d^6(^5D)4s4p(^3P^o)$ | $3d^64s(^6D_{3/2})6d$    | [2]       |
| 594 | 297.55          | 33               | 297.5526              | Fe II | $3d^5(^6S)4s4p(^1P^o)$ | $3d^5(^6S)4p^2$          | [1]       |
|     |                 |                  | 297.5621              | Fe II | $3d^6(^3G)4p$          | $3d^6(^5D)5d$            | [1]       |
|     |                 |                  | 297.5648              | Fe I  | $3d^64s^2$             | $3d^6(^3G)4s4p(^3P^o)$   | [2]       |
| 595 | 297.669         | 43               | 297.65498             | Fe I  | $3d^6(^5D)4s4p(^3P^o)$ | $3d^64s(^6D)5d$          | [2]       |

| No. | Wavelength (nm) | Intensity (a.u.) | Wavelength (nm), Ref. | Type  | Lower energy level     | Higher energy level     | Reference |
|-----|-----------------|------------------|-----------------------|-------|------------------------|-------------------------|-----------|
|     |                 |                  | 297.6585              | Fe I  | $3d^6(^5D)4s4p(^3P^o)$ | $3d^64s(^6D_{5/2})6d$   | [2]       |
| 596 | 297.872         | 48               | 297.8674              | Fe I  | $3d^6(^5D)4s4p(^3P^o)$ | $3d^64s(^6D)5d$         | [2]       |
|     |                 |                  | 297.8848              | Fe II | $3d^6(^3G)4s$          | $3d^6(^3F2)4p$          | [1]       |
| 597 | 297.943         | 39               | 297.93532             | Fe II | $3d^6(^5D)4s$          | $3d^6(^5D)4p$           | [1]       |
|     |                 |                  | 297.9408              | Fe I  | $3d^6(^5D)4s4p(^3P^o)$ | $3d^64s(^6D)5d$         | [2]       |
|     |                 |                  | 297.9563              | Fe II | $3d^5(^4P)4s4p(^3P^o)$ | $3d^6(^3H)6s$           | [1]       |
| 598 | 298.063         | 53               | 298.05322             | Fe I  | $3d^7(^2G)4s$          | $3d^6(^1G2)4s4p(^3P^o)$ | [2]       |
|     |                 |                  | 298.0592              | Fe I  | $3d^64s^2$             | $3d^7(^4F)5p$           | [1]       |
|     |                 |                  | 298.0592              | Fe II | $3d^6(^3D)4p$          | $3d^54s(^7S)4d$         | [1]       |
|     |                 |                  | 298.0647              | Fe II | $3d^6(^1G1)4s$         | $3d^6(^3F1)4p$          | [1]       |
| 599 | 298.48          | 274              | 298.47679             | Fe I  | $3d^7(^4F)4s$          | $3d^5(^6S)4s^24p$       | [2]       |
|     |                 |                  | 298.482516            | Fe II | $3d^7$                 | $3d^6(^5D)4p$           | [1]       |
|     |                 |                  | 298.489               | Fe II | $3d^6(^3F2)4s$         | $3d^6(^3H)4p$           | [1]       |
| 600 | 298.516         | 32               | 298.5091              | Fe II | $3d^54s^2$             | $3d^6(^5D)5p$           | [1]       |
|     |                 |                  | 298.5168              | Fe I  | $3d^6(^5D)4s4p(^3P^o)$ | $3d^64s(^6D_{3/2})6d$   | [2]       |
| 601 | 298.552         | 52               | 298.554532            | Fe II | $3d^7$                 | $3d^6(^5D)4p$           | [1]       |
|     |                 |                  | 298.5637              | Fe II | $3d^6(^5D)4p$          | $3d^6(^5D)5s$           | [1]       |
| 602 | 298.647         | 56               | 298.63435             | Fe II | $3d^6(^3F2)4p$         | $3d^6(^3F2)5s$          | [1]       |
|     |                 |                  | 298.64557             | Fe I  | $3d^64s^2$             | $3d^6(^5D)4s4p(^3P^o)$  | [2]       |
|     |                 |                  | 298.6609              | Fe II | $3d^6(^3F2)4s$         | $3d^6(^3P2)4p$          | [1]       |
| 603 | 298.73          | 239              | 298.72903             | Fe I  | $3d^6(^5D)4s4p(^3P^o)$ | $3d^64s(^6D)5d$         | [2]       |
|     |                 |                  | 298.72904             | Fe I  | $3d^7(^4F)4s$          | $3d^6(^5D)4s4p(^1P^o)$  | [2]       |
|     |                 |                  | 298.7429              | Fe I  | $3d^64s^2$             | $3d^7(^4F)5p$           | [2]       |
| 604 | 299.112         | 51               | 299.1081              | Fe II | $3d^6(^1G1)4s$         | $3d^5(^4G)4s4p(^3P^o)$  | [1]       |
|     |                 |                  | 299.1236              | Fe II | $3d^6(^3F2)4s$         | $3d^6(^3H)4p$           | [1]       |
| 605 | 299.315         | 25               | 299.3206              | Fe II | $3d^54s^2$             | $3d^5(^4D)4s4p(^3P^o)$  | [1]       |
|     |                 |                  | 299.328               | Fe I  | $3d^6(^5D)4s4p(^3P^o)$ | $3d^64s(^6D_{7/2})6d$   | [2]       |
| 606 | 299.446         | 14188            | 299.44266             | Fe I  | $3d^64s^2$             | $3d^7(^4F)4p$           | [2]       |
|     |                 |                  | 299.45019             | Fe I  | $3d^64s^2$             | $3d^6(^5D)4s4p(^3P^o)$  | [2]       |
| 607 | 299.767         | 36               | 299.7526              | Fe I  | $3d^6(^5D)4s4p(^3P^o)$ | $3d^64s(^6D)5d$         | [2]       |
|     |                 |                  | 299.7526              | Fe II | $3d^6(^3D)4p$          | $3d^6(^3F2)4d$          | [1]       |
|     |                 |                  | 299.7706              | Fe II | $3d^6(^3D)4p$          | $3d^6(^3F2)4d$          | [1]       |
| 608 | 300.042         | 342              | 300.0295              | Fe II | $3d^6(^1S2)4p$         | $3d^54s(^7S)4d$         | [1]       |
|     |                 |                  | 300.0295              | Fe II | $3d^54s^2$             | $3d^6(^5D)5p$           | [1]       |
|     |                 |                  | 300.04509             | Fe I  | $3d^7(^4F)4s$          | $3d^6(^3H)4s4p(^3P^o)$  | [2]       |
| 609 | 300.089         | 6416             | 300.0755              | Fe II | $3d^54s^2$             | $3d^6(^5D)6p$           | [1]       |

| No. | Wavelength (nm) | Intensity (a.u.) | Wavelength (nm), Ref. | Type  | Lower energy level     | Higher energy level     | Reference |
|-----|-----------------|------------------|-----------------------|-------|------------------------|-------------------------|-----------|
|     |                 |                  | 300.09476             | Fe I  | $3d^6 4s^2$            | $3d^7(^4F)4p$           | [2]       |
| 610 | 300.173         | 491              | 300.1601              | Fe II | $3d^6(^3G)4p$          | $3d^6(^3F2)5s$          | [1]       |
|     |                 |                  | 300.1658              | Fe I  | $3d^7(^2P)4s$          | $3d^6(^3D)4s4p(^3P^o)$  | [2]       |
|     |                 |                  | 300.1787              | Fe I  | $3d^6 4s^2$            | $3d^7(^4F)5p$           | [2]       |
|     |                 |                  | 300.1827              | Fe I  | $3d^7(^2P)4s$          | $3d^6 4s(^4D)5p$        | [2]       |
| 611 | 300.268         | 105              | 300.264344            | Fe II | $3d^6(^3G)4p$          | $3d^6(^3G)5s$           | [1]       |
|     |                 |                  | 300.264344            | Fe II | $3d^7$                 | $3d^6(^5D)4p$           | [1]       |
| 612 | 300.721         | 892              | 300.7145              | Fe I  | $3d^7(^4F)4s$          | $3d^6(^3P2)4s4p(^3P^o)$ | [2]       |
|     |                 |                  | 300.72822             | Fe I  | $3d^6 4s^2$            | $3d^6(^5D)4s4p(^3P^o)$  | [2]       |
| 613 | 300.816         | 3564             | 300.8138              | Fe I  | $3d^6 4s^2$            | $3d^7(^4F)4p$           | [2]       |
|     |                 |                  | 300.8306              | Fe II | $3d^5(^6S)4s4p(^3P^o)$ | $3d^6(^5D)6s$           | [1]       |
| 614 | 300.912         | 33               | 300.90929             | Fe I  | $3d^6 4s^2$            | $3d^7(^2H)4p$           | [2]       |
|     |                 |                  | 300.925               | Fe II | $3d^6(^3F2)4p$         | $3d^6(^3P2)5s$          | [1]       |
| 615 | 300.959         | 2054             | 300.95691             | Fe I  | $3d^7(^4F)4s$          | $3d^6(^5D)4s4p(^1P^o)$  | [2]       |
|     |                 |                  | 300.9681              | Fe I  | $3d^6(^5D)4s4p(^3P^o)$ | $3d^6 4s(^6D_{5/2})6d$  | [2]       |
| 616 | 301.15          | 93               | 301.1474              | Fe I  | $3d^6 4s^2$            | $3d^7(^4F)5p$           | [2]       |
|     |                 |                  | 301.14808             | Fe I  | $3d^7(^2G)4s$          | $3d^6(^1G2)4s4p(^3P^o)$ | [2]       |
| 617 | 301.293         | 52               | 301.2933              | Fe I  | $3d^6(^5D)4s4p(^3P^o)$ | $3d^6 4s(^6D_{7/2})6d$  | [2]       |
|     |                 |                  | 301.2933              | Fe I  | $3d^6(^5D)4s4p(^3P^o)$ | $3d^6 4s(^6D)5d$        | [2]       |
| 618 | 301.412         | 33               | 301.4099              | Fe I  | $3d^6 4s^2$            | $3d^7(^2H)4p$           | [2]       |
|     |                 |                  | 301.4164              | Fe II | $3d^5 4s^2$            | $3d^6(^3F2)5p$          | [1]       |
|     |                 |                  | 301.41732             | Fe I  | $3d^7(^4F)4s$          | $3d^6(^3P2)4s4p(^3P^o)$ | [2]       |
| 619 | 301.734         | 105              | 301.7251              | Fe I  | $3d^6(^1I)4p$          | $3d^6(^3H)4d$           | [2]       |
|     |                 |                  | 301.7251              | Fe II | $3d^6(^5D)4s4p(^3P^o)$ | $3d^6 4s(^6D)5d$        | [2]       |
|     |                 |                  | 301.74173             | Fe I  | $3d^6(^5D)4s4p(^3P^o)$ | $3d^6 4s(^6D)5d$        | [2]       |
| 620 | 301.901         | 531              | 301.89828             | Fe I  | $3d^7(^4F)4s$          | $3d^6(^5D)4s4p(^1P^o)$  | [2]       |
|     |                 |                  | 301.913               | Fe II | $3d^6(^3D)4p$          | $3d^6(^3F2)4d$          | [1]       |
| 621 | 302.061         | 59071            | 302.04905             | Fe I  | $3d^6 4s^2$            | $3d^7(^4F)4p$           | [2]       |
|     |                 |                  | 302.06388             | Fe I  | $3d^6 4s^2$            | $3d^7(^4F)4p$           | [2]       |
|     |                 |                  | 302.0758              | Fe II | $3d^6(^3F1)4s$         | $3d^5(^4G)4s4p(^3P^o)$  | [1]       |
| 622 | 302.646         | 177              | 302.64617             | Fe I  | $3d^7(^4F)4s$          | $3d^6(^5D)4s4p(^1P^o)$  | [2]       |
|     |                 |                  | 302.6608              | Fe II | $3d^6(^3D)4p$          | $3d^6(^3F2)4d$          | [1]       |
| 623 | 302.706         | 200              | 302.6936              | Fe II | $3d^6(^1G2)4p$         | $3d^6(^3F2)4d$          | [1]       |
|     |                 |                  | 302.7201              | Fe II | $3d^6(^1S2)4p$         | $3d^6(^3D)5s$           | [1]       |
| 624 | 303.087         | 74               | 303.0759              | Fe I  | $3d^6 4s^2$            | $3d^6(^1I)4s4p(^3P^o)$  | [2]       |
|     |                 |                  | 303.0958              | Fe I  | $3d^6 4s^2$            | $3d^6(^5D)4s(^6D)5p$    | [2]       |

| No. | Wavelength (nm) | Intensity (a.u.) | Wavelength (nm), Ref. | Type  | Lower energy level     | Higher energy level     | Reference |
|-----|-----------------|------------------|-----------------------|-------|------------------------|-------------------------|-----------|
| 625 | 303.123         | 178              | 303.12123             | Fe I  | $3d^6 4s^2$            | $3d^7(^2H)4p$           | [2]       |
|     |                 |                  | 303.133               | Fe I  | $3d^6(^5D)4s4p(^3P^o)$ | $3d^6 4s(^6D)5d$        | [2]       |
| 626 | 303.171         | 124              | 303.16364             | Fe I  | $3d^7(^4F)4s$          | $3d^6(^5D)4s4p(^1P^o)$  | [2]       |
|     |                 |                  | 303.1712              | Fe I  | $3d^6(^5D)4s4p(^3P^o)$ | $3d^6 4s(^6D)5d$        | [2]       |
|     |                 |                  | 303.186               | Fe I  | $3d^6(^5D)4s4p(^3P^o)$ | $3d^6(^5D)4p^2(^3P)$    | [2]       |
| 627 | 303.445         | 782              | 303.4479              | Fe I  | $3d^7(^4F)4s$          | $3d^6(^3F2)4s4p(^3P^o)$ | [2]       |
|     |                 |                  | 303.45363             | Fe II | $3d^6(^3D)4p$          | $3d^6(^3G)4d$           | [1]       |
|     |                 |                  | 303.45364             | Fe I  | $3d^6(^5D)4s4p(^3P^o)$ | $3d^6 4s(^6D)5d$        | [2]       |
|     |                 |                  | 303.4592              | Fe I  | $3d^6(^5D)4s4p(^3P^o)$ | $3d^6 4s(^6D)5d$        | [2]       |
| 628 | 303.743         | 6880             | 303.73885             | Fe I  | $3d^6 4s^2$            | $3d^7(^4F)4p$           | [2]       |
|     |                 |                  | 303.7542              | Fe I  | $3d^6(^5D)4s4p(^3P^o)$ | $3d^6 4s(^6D_{9/2})6d$  | [2]       |
| 629 | 303.958         | 218              | 303.9598              | Fe I  | $3d^6(^5D)4s4p(^3P^o)$ | $3d^6 4s(^6D)5d$        | [2]       |
|     |                 |                  | 303.9599              | Fe II | $3d^6(^3D)4p$          | $3d^6(^3D)5s$           | [1]       |
|     |                 |                  | 303.9599              | Fe II | $3d^6(^3D)4p$          | $3d^6(^3F2)4d$          | [1]       |
|     |                 |                  | 303.9629              | Fe II | $3d^6(^3D)4p$          | $3d^6(^5D)5d$           | [1]       |
|     |                 |                  | 303.9629              | Fe II | $3d^6(^3H)4p$          | $3d^6(^3H)5s$           | [1]       |
| 630 | 304.041         | 341              | 304.0281              | Fe II | $3d^6(^3D)4p$          | $3d^6(^3P2)4d$          | [1]       |
|     |                 |                  | 304.04271             | Fe I  | $3d^7(^4F)4s$          | $3d^6(^5D)4s4p(^1P^o)$  | [2]       |
| 631 | 304.089         | 58               | 304.0759              | Fe I  | $3d^7(^2D2)4s$         | $3d^6(^3P2)4s4p(^1P^o)$ | [2]       |
|     |                 |                  | 304.0848              | Fe II | $3d^6(^1G2)4s$         | $3d^6(^3G)4p$           | [1]       |
|     |                 |                  | 304.0914              | Fe II | $3d^6(^1G2)4p$         | $3d^6(^3H)4d$           | [1]       |
|     |                 |                  | 304.0914              | Fe II | $3d^6(^3D)4p$          | $3d^6(^3F2)4d$          | [1]       |
|     |                 |                  | 304.0956              | Fe I  | $3d^6 4s^2$            | $3d^6(^3G)4s4p(^3P^o)$  | [2]       |
|     |                 |                  | 304.0956              | Fe I  | $3d^6(^5D)4s4p(^3P^o)$ | $3d^6 4s(^6D)5d$        | [2]       |
|     |                 |                  | 304.1029              | Fe I  | $3d^6 4s^2$            | $3d^6(^3D)4s4p(^3P^o)$  | [2]       |
| 632 | 304.173         | 435              | 304.1637              | Fe I  | $3d^7(^4F)4s$          | $3d^6(^3H)4s4p(^3P^o)$  | [2]       |
|     |                 |                  | 304.17386             | Fe I  | $3d^7(^4F)4s$          | $3d^6(^5D)4s4p(^1P^o)$  | [2]       |
| 633 | 304.411         | 65               | 304.4103              | Fe I  | $3d^7(^2H)4s$          | $3d^6(^3H)4s4p(^1P^o)$  | [1]       |
|     |                 |                  | 304.4103              | Fe II | $3d^6(^3D)4p$          | $3d^6(^3F2)4d$          | [1]       |
|     |                 |                  | 304.4216              | Fe I  | $3d^6(^5D)4s4p(^3P^o)$ | $3d^6 4s(^4D)4d$        | [2]       |
|     |                 |                  | 304.4255              | Fe I  | $3d^6(^5D)4s4p(^3P^o)$ | $3d^6 4s(^6D)5d$        | [2]       |
| 634 | 304.757         | 9098             | 304.7454              | Fe I  | $3d^6(^5D)4s4p(^3P^o)$ | $3d^7(^4F)6s$           | [2]       |
|     |                 |                  | 304.76043             | Fe I  | $3d^6 4s^2$            | $3d^7(^4F)4p$           | [2]       |
| 635 | 305.258         | 69               | 305.2491              | Fe I  | $3d^6(^5D)4s4p(^3P^o)$ | $3d^6 4s(^6D)5d$        | [2]       |
|     |                 |                  | 305.258               | Fe II | $3d^6(^1I)4p$          | $3d^5 4s(^7S)4d$        | [1]       |
|     |                 |                  | 305.2715              | Fe II | $3d^6(^3D)4p$          | $3d^6(^3F2)4d$          | [1]       |

| No. | Wavelength (nm) | Intensity (a.u.) | Wavelength (nm), Ref. | Type  | Lower energy level     | Higher energy level     | Reference |
|-----|-----------------|------------------|-----------------------|-------|------------------------|-------------------------|-----------|
| 636 | 305.341         | 31               | 305.34281             | Fe I  | $3d^6(^5D)4s4p(^3P^o)$ | $3d^64s(^6D)5d$         | [2]       |
|     |                 |                  | 305.34533             | Fe I  | $3d^7(^4F)4s$          | $3d^6(^3P2)4s4p(^3P^o)$ | [2]       |
| 637 | 305.532         | 104              | 305.52622             | Fe I  | $3d^7(^4F)4s$          | $3d^6(^3P2)4s4p(^3P^o)$ | [2]       |
|     |                 |                  | 305.52933             | Fe I  | $3d^6(^5D)4s4p(^3P^o)$ | $3d^64s(^6D)5d$         | [2]       |
|     |                 |                  | 305.52933             | Fe II | $3d^6(^1G2)4p$         | $3d^6(^3F2)4d$          | [1]       |
|     |                 |                  | 305.53503             | Fe II | $3d^6(^5D)4p$          | $3d^6(^5D)5s$           | [1]       |
|     |                 |                  | 305.5356              | Fe I  | $3d^6(^5D)4s4p(^3P^o)$ | $3d^64s(^6D_{5/2})6d$   | [2]       |
| 638 | 305.746         | 10444            | 305.74456             | Fe I  | $3d^7(^4F)4s$          | $3d^6(^5D)4s4p(^1P^o)$  | [2]       |
|     |                 |                  | 305.7584              | Fe I  | $3d^6(^5D)4s4p(^3P^o)$ | $3d^64s(^6D)7s$         | [1]       |
|     |                 |                  | 305.7584              | Fe II | $3d^6(^3D)4p$          | $3d^6(^3F2)4d$          | [1]       |
| 639 | 306.068         | 58               | 306.05376             | Fe I  | $3d^64s^2$             | $3d^6(^1G2)4s4p(^3P^o)$ | [2]       |
|     |                 |                  | 306.0626              | Fe I  | $3d^6(^5D)4s4p(^3P^o)$ | $3d^64s(^6D)5d$         | [2]       |
|     |                 |                  | 306.07764             | Fe I  | $3d^6(^5D)4s4p(^3P^o)$ | $3d^64s(^6D)5d$         | [2]       |
| 640 | 306.473         | 39               | 306.4695              | Fe I  | $3d^6(^5D)4s4p(^3P^o)$ | $3d^6(^5D)4s(^4D)4d$    | [2]       |
|     |                 |                  | 306.4837              | Fe I  | $3d^6(^5D)4s4p(^3P^o)$ | $3d^64s(^6D_{1/2})6d$   | [2]       |
| 641 | 306.652         | 42               | 306.64787             | Fe I  | $3d^7(^2G)4s$          | $3d^6(^3G)4s4p(^3P^o)$  | [2]       |
|     |                 |                  | 306.6486              | Fe I  | $3d^6(^5D)4s4p(^3P^o)$ | $3d^64s(^6D_{7/2})6d$   | [2]       |
| 642 | 306.724         | 2394             | 306.71181             | Fe I  | $3d^7(^4F)4s$          | $3d^6(^3H)4s4p(^3P^o)$  | [2]       |
|     |                 |                  | 306.72437             | Fe I  | $3d^7(^4F)4s$          | $3d^6(^5D)4s4p(^1P^o)$  | [2]       |
| 643 | 306.783         | 45               | 306.783               | Fe II | $3d^6(^3D)4p$          | $3d^6(^3P2)4d$          | [1]       |
|     |                 |                  | 306.7948              | Fe I  | $3d^7(^2G)4s$          | $3d^6(^3D)4s4p(^3P^o)$  | [2]       |
| 644 | 306.819         | 72               | 306.81733             | Fe I  | $3d^7(^4F)4s$          | $3d^6(^3P2)4s4p(^3P^o)$ | [2]       |
|     |                 |                  | 306.8301              | Fe I  | $3d^6(^5D)4s4p(^3P^o)$ | $3d^64s(^4D)4d$         | [2]       |
| 645 | 307.117         | 31               | 307.11248             | Fe II | $3d^6(^5D)4p$          | $3d^6(^5D)5s$           | [1]       |
|     |                 |                  | 307.11249             | Fe I  | $3d^6(^5D)4s4p(^3P^o)$ | $3d^64s(^6D_{5/2})6d$   | [2]       |
|     |                 |                  | 307.1277              | Fe I  | $3d^64s^2$             | $3d^6(^1I)4s4p(^3P^o)$  | [1]       |
|     |                 |                  | 307.1277              | Fe II | $3d^6(^3F2)4p$         | $3d^6(^3F2)5s$          | [1]       |
| 646 | 307.582         | 684              | 307.56744             | Fe II | $3d^6(^1G2)4p$         | $3d^6(^3H)4d$           | [1]       |
|     |                 |                  | 307.5701              | Fe II | $3d^6(^3D)4p$          | $3d^6(^3H)4d$           | [1]       |
|     |                 |                  | 307.57194             | Fe I  | $3d^7(^4F)4s$          | $3d^6(^5D)4s4p(^1P^o)$  | [2]       |
|     |                 |                  | 307.5856              | Fe II | $3d^6(^1G1)4s$         | $3d^6(^5D)5p$           | [1]       |
| 647 | 308.821         | 157              | 308.8171              | Fe I  | $3d^6(^5D)4s4p(^3P^o)$ | $3d^64s(^4D)4d$         | [2]       |
|     |                 |                  | 308.82143             | Fe I  | $3d^6(^5D)4s4p(^3P^o)$ | $3d^64s(^6D_{7/2})6d$   | [2]       |
|     |                 |                  | 308.8244              | Fe I  | $3d^6(^5D)4s4p(^3P^o)$ | $3d^6(^5D)4s(^4D)4d$    | [2]       |
|     |                 |                  | 308.8346              | Fe I  | $3d^6(^5D)4s4p(^3P^o)$ | $3d^6(^5D)4s(^4D)4d$    | [2]       |
| 648 | 309.166         | 142              | 309.15763             | Fe I  | $3d^7(^4F)4s$          | $3d^6(^5D)4s4p(^1P^o)$  | [2]       |

| No. | Wavelength (nm) | Intensity (a.u.) | Wavelength (nm), Ref. | Type  | Lower energy level     | Higher energy level     | Reference |
|-----|-----------------|------------------|-----------------------|-------|------------------------|-------------------------|-----------|
|     |                 |                  | 309.1688              | Fe I  | $3d^6(^5D)4s4p(^3P^o)$ | $3d^7(^4F)6s$           | [2]       |
| 649 | 309.75          | 43               | 309.7417              | Fe II | $3d^7$                 | $3d^6(^3F2)4p$          | [1]       |
|     |                 |                  | 309.7493              | Fe I  | $3d^6(^5D)4s4p(^3P^o)$ | $3d^6(^5D)4s(^6D)4d$    | [2]       |
|     |                 |                  | 309.7494              | Fe II | $3d^6(^1G2)4p$         | $3d^6(^3F2)4d$          | [1]       |
|     |                 |                  | 309.81891             | Fe I  | $3d^7(^2G)4s$          | $3d^6(^3G)4s4p(^3P^o)$  | [2]       |
| 650 | 309.821         | 42               | 309.8351              | Fe II | $3d^6(^3D)4p$          | $3d^6(^3F2)4d$          | [1]       |
|     |                 |                  | 309.98943             | Fe I  | $3d^7(^4F)4s$          | $3d^6(^5D)4s4p(^1P^o)$  | [2]       |
| 651 | 310             | 1434             | 309.99679             | Fe I  | $3d^7(^4F)4s$          | $3d^6(^5D)4s4p(^1P^o)$  | [2]       |
|     |                 |                  | 310.0103              | Fe II | $3d^6(^3F1)4p$         | $3d^6(^3H)6s$           | [1]       |
|     |                 |                  | 310.06647             | Fe I  | $3d^7(^4F)4s$          | $3d^6(^5D)4s4p(^1P^o)$  | [2]       |
| 652 | 310.071         | 835              | 310.0836              | Fe I  | $3d^64s^2$             | $3d^6(^3H)4s4p(^3P^o)$  | [2]       |
|     |                 |                  | 310.2869              | Fe I  | $3d^6(^5D)4s4p(^3P^o)$ | $3d^64s(^4D)4d$         | [2]       |
| 653 | 310.297         | 62               | 310.2957              | Fe II | $3d^6(^1G2)4p$         | $3d^6(^3P2)4d$          | [1]       |
|     |                 |                  | 310.7976              | Fe I  | $3d^7(^2G)4s$          | $3d^6(^3D)4s4p(^3P^o)$  | [2]       |
| 654 | 310.809         | 32               | 310.7976              | Fe I  | $3d^64s^2$             | $3d^7(^4F)5p$           | [2]       |
|     |                 |                  | 311.65802             | Fe II | $3d^6(^3D)4s$          | $3d^6(^3F2)4p$          | [1]       |
| 655 | 311.666         | 48               | 311.66313             | Fe I  | $3d^7(^4F)4s$          | $3d^6(^5D)4s4p(^1P^o)$  | [2]       |
|     |                 |                  | 311.8164              | Fe I  | $3d^6(^5D)4s4p(^3P^o)$ | $3d^64s(^6D)6s$         | [2]       |
| 656 | 311.821         | 147              | 311.8298              | Fe II | $3d^54s^2$             | $3d^5(^4G)4s4p(^3P^o)$  | [1]       |
|     |                 |                  | 311.94947             | Fe I  | $3d^64s^2$             | $3d^7(^2H)4p$           | [2]       |
| 657 | 311.952         | 36               | 311.95812             | Fe I  | $3d^7(^4F)4s$          | $3d^6(^3F2)4s4p(^3P^o)$ | [2]       |
|     |                 |                  | 312.5646              | Fe I  | $3d^7(^2G)4s$          | $3d^6(^3G)4s4p(^3P^o)$  | [2]       |
| 658 | 312.571         | 120              | 312.5646              | Fe I  | $3d^6(^5D)4s4p(^3P^o)$ | $3d^6(^5D)4s(^6D)4d$    | [2]       |
|     |                 |                  | 312.56503             | Fe I  | $3d^7(^4F)4s$          | $3d^6(^5D)4s4p(^1P^o)$  | [2]       |
|     |                 |                  | 312.56823             | Fe I  | $3d^64s^2$             | $3d^7(^2H)4p$           | [2]       |
|     |                 |                  | 312.5694              | Fe I  | $3d^7(^2H)4s$          | $3d^6(^3H)4s4p(^1P^o)$  | [2]       |
|     |                 |                  | 312.61763             | Fe I  | $3d^6(^5D)4s4p(^3P^o)$ | $3d^64s(^4D)4d$         | [2]       |
| 659 | 312.618         | 244              | 312.6275              | Fe II | $3d^6(^1G2)4p$         | $3d^6(^3F2)4d$          | [1]       |
|     |                 |                  | 312.6275              | Fe II | $3d^6(^1G2)4p$         | $3d^6(^3P2)4d$          | [1]       |
|     |                 |                  | 313.25177             | Fe I  | $3d^6(^5D)4s4p(^3P^o)$ | $3d^6(^5D)4s(^4D)4d$    | [2]       |
| 660 | 313.261         | 27               | 313.2649              | Fe I  | $3d^7(^2H)4s$          | $3d^6(^3H)4s4p(^1P^o)$  | [2]       |
|     |                 |                  | 313.41098             | Fe I  | $3d^7(^4F)4s$          | $3d^6(^5D)4s4p(^1P^o)$  | [2]       |
| 661 | 313.416         | 48               | 313.4228              | Fe II | $3d^6(^3G)4p$          | $3d^6(^3H)5s$           | [1]       |
|     |                 |                  | 313.4248              | Fe I  | $3d^7(^2D2)4s$         | $3d^64s(^4D)5p$         | [2]       |
|     |                 |                  | 313.4412              | Fe I  | $3d^7(^2G)4s$          | $3d^7(^4F)5p$           | [2]       |
| 662 | 313.451         | 18               | 313.4639              | Fe I  | $3d^7(^2G)4s$          | $3d^6(^3D)4s4p(^3P^o)$  | [2]       |

| No. | Wavelength (nm) | Intensity (a.u.) | Wavelength (nm), Ref. | Type  | Lower energy level     | Higher energy level     | Reference |
|-----|-----------------|------------------|-----------------------|-------|------------------------|-------------------------|-----------|
| 663 | 314.248         | 32               | 314.24537             | Fe I  | $3d^6(^5D)4s4p(^3P^o)$ | $3d^6(^5D)4s(^6D)4d$    | [2]       |
|     |                 |                  | 314.2456              | Fe I  | $3d^6(^5D)4s4p(^3P^o)$ | $3d^64s(^4D)4d$         | [2]       |
|     |                 |                  | 314.2555              | Fe II | $3d^6(^1G2)4p$         | $3d^6(^5D)5d$           | [1]       |
| 664 | 314.45          | 34               | 314.4428              | Fe I  | $3d^7(^2G)4s$          | $3d^7(^4F)5p$           | [2]       |
|     |                 |                  | 314.44965             | Fe I  | $3d^6(^5D)4s4p(^3P^o)$ | $3d^64s(^4D)4d$         | [2]       |
|     |                 |                  | 314.4606              | Fe II | $3d^6(^1G2)4p$         | $3d^6(^3H)4d$           | [1]       |
| 665 | 314.498         | 26               | 314.4923              | Fe I  | $3d^64s^2$             | $3d^6(^3G)4s4p(^3P^o)$  | [2]       |
|     |                 |                  | 314.50568             | Fe I  | $3d^64s^2$             | $3d^6(^1G2)4s4p(^3P^o)$ | [2]       |
| 666 | 314.665         | 105              | 314.6604              | Fe I  | $3d^7(^2D2)4s$         | $3d^64s(^4D)5p$         | [2]       |
|     |                 |                  | 314.6604              | Fe II | $3d^54s^2$             | $3d^6(^3P1)4p$          | [1]       |
|     |                 |                  | 314.6755              | Fe II | $3d^6(^3G)4s$          | $3d^6(^3F2)4p$          | [1]       |
| 667 | 315.319         | 45               | 315.3056              | Fe I  | $3d^7(^4P)4s$          | $3d^7(^2G)4p$           | [2]       |
|     |                 |                  | 315.3056              | Fe I  | $3d^64s^2$             | $3d^6(^1G2)4s4p(^3P^o)$ | [2]       |
|     |                 |                  | 315.31995             | Fe I  | $3d^6(^5D)4s4p(^3P^o)$ | $3d^6(^5D)4s(^6D)4d$    | [2]       |
|     |                 |                  | 315.33134             | Fe I  | $3d^6(^5D)4s4p(^3P^o)$ | $3d^6(^5D)4s(^6D)4d$    | [2]       |
| 668 | 315.426         |                  | 315.411               | Fe I  | $3d^7(^4F)4s$          | $3d^6(^3F2)4s4p(^3P^o)$ | [2]       |
|     |                 |                  | 315.42011             | Fe II | $3d^6(^3G)4s$          | $3d^6(^3H)4p$           | [1]       |
|     |                 |                  | 315.43849             | Fe I  | $3d^7(^4P)4s$          | $3d^7(^2G)4p$           | [2]       |
| 669 | 315.449         | 27               | 315.43849             | Fe I  | $3d^7(^4P)4s$          | $3d^7(^2G)4p$           | [2]       |
|     |                 |                  | 315.44293             | Fe I  | $3d^7(^2D2)4s$         | $3d^64s(^4D)5p$         | [2]       |
|     |                 |                  | 315.4433              | Fe I  | $3d^7(^4P)4s$          | $3d^7(^4F)5p$           | [2]       |
|     |                 |                  | 315.44964             | Fe I  | $3d^6(^5D)4s4p(^3P^o)$ | $3d^6(^5D)4s(^6D)4d$    | [2]       |
| 670 | 315.497         | 24               | 315.5118              | Fe I  | $3d^6(^5D)4s4p(^3P^o)$ | $3d^6(^5D)4s(^6D)4d$    | [2]       |
|     |                 |                  | 315.5118              | Fe II | $3d^6(^1)4p$           | $3d^6(^3F2)4d$          | [1]       |
| 671 | 315.628         | 48               | 315.62736             | Fe I  | $3d^6(^5D)4s4p(^3P^o)$ | $3d^6(^5D)4s(^4D)4d$    | [2]       |
|     |                 |                  | 315.6421              | Fe I  | $3d^6(^5D)4s4p(^3P^o)$ | $3d^64s(^6D)6s$         | [2]       |
| 672 | 315.711         | 81               | 315.70359             | Fe I  | $3d^6(^5D)4s4p(^3P^o)$ | $3d^6(^5D)4s(^6D)4d$    | [2]       |
|     |                 |                  | 315.7143              | Fe I  | $3d^64s^2$             | $3d^7(^2P)4p$           | [2]       |
|     |                 |                  | 315.7204              | Fe I  | $3d^6(^5D)4s4p(^3P^o)$ |                         | [2]       |
| 673 | 315.794         | 50               | 315.78848             | Fe I  | $3d^6(^5D)4s4p(^3P^o)$ | $3d^64s(^6D_{9/2})6d$   | [2]       |
|     |                 |                  | 315.78848             | Fe I  | $3d^6(^5D)4s4p(^3P^o)$ | $3d^6(^5D)4s(^6D)4d$    | [2]       |
|     |                 |                  | 315.79871             | Fe I  | $3d^6(^5D)4s4p(^3P^o)$ | $3d^6(^5D)4s(^6D)4d$    | [2]       |
| 674 | 315.889         | 122              | 315.8776              | Fe II | $3d^6(^3D)4p$          | $3d^6(^5D)5d$           | [1]       |
|     |                 |                  | 315.90208             | Fe I  | $3d^64s^2$             | $3d^6(^1G2)4s4p(^3P^o)$ | [2]       |
| 675 | 315.913         | 27               | 315.90208             | Fe I  | $3d^64s^2$             | $3d^6(^1G2)4s4p(^3P^o)$ | [2]       |
|     |                 |                  | 315.9123              | Fe I  | $3d^6(^5D)4s4p(^3P^o)$ | $3d^7(^4F)5d$           | [2]       |

| No. | Wavelength (nm) | Intensity (a.u.) | Wavelength (nm), Ref. | Type  | Lower energy level     | Higher energy level     | Reference |
|-----|-----------------|------------------|-----------------------|-------|------------------------|-------------------------|-----------|
|     |                 |                  | 315.9123              | Fe II | $3d^6(^3P1)4s$         | $3d^6(^1F)4p$           | [1]       |
|     |                 |                  | 315.925               | Fe I  | $3d^64s^2$             | $3d^7(^2D2)4p$          | [2]       |
| 676 | 316.032         | 51               | 316.01962             | Fe I  | $3d^6(^5D)4s4p(^3P^o)$ | $3d^6(^5D)4s(^4D)4d$    | [2]       |
|     |                 |                  | 316.0243              | Fe I  | $3d^6(^5D)4s4p(^3P^o)$ | $3d^64s(^6D)6s$         | [2]       |
|     |                 |                  | 316.03413             | Fe I  | $3d^64s^2$             | $3d^6(^3G)4s4p(^3P^o)$  | [2]       |
| 677 | 316.068         | 102              | 316.06572             | Fe I  | $3d^6(^5D)4s4p(^3P^o)$ | $3d^6(^5D)4s(^6D)4d$    | [2]       |
|     |                 |                  | 316.07738             | Fe I  | $3d^6(^5D)4s4p(^3P^o)$ | $3d^6(^5D)4s(^6D)4d$    | [2]       |
| 678 | 316.591         | 47               | 316.58575             | Fe I  | $3d^6(^5D)4s4p(^3P^o)$ | $3d^6(^5D)4s(^6D)4d$    | [2]       |
|     |                 |                  | 316.5933              | Fe I  | $3d^64s^2$             | $3d^7(^2D2)4p$          | [2]       |
| 679 | 316.626         | 33               | 316.62442             | Fe I  | $3d^6(^5D)4s4p(^3P^o)$ | $3d^6(^5D)4s(^6D)4d$    | [2]       |
|     |                 |                  | 316.6336              | Fe I  | $3d^64s^2$             | $3d^6(^5D)4s(^6D)5p$    | [2]       |
|     |                 |                  | 316.6401              | Fe II | $3d^6(^3G)4p$          | $3d^6(^3F2)5s$          | [1]       |
| 680 | 316.65          | 32               | 316.6401              | Fe II | $3d^6(^3G)4p$          | $3d^6(^3F2)5s$          | [1]       |
|     |                 |                  | 316.64353             | Fe I  | $3d^64s^2$             | $3d^7(^2D2)4p$          | [2]       |
|     |                 |                  | 316.6528              | Fe II | $3d^7$                 | $3d^5(^6S)4s4p(^1P^o)$  | [8]       |
|     |                 |                  | 316.65865             | Fe I  | $3d^6(^5D)4s4p(^3P^o)$ | $3d^64s(^4D)4d$         | [2]       |
|     |                 |                  | 316.6591              | Fe I  | $3d^7(^4P)4s$          | $3d^6(^3F2)4s4p(^3P^o)$ | [2]       |
| 681 | 316.793         | 38               | 316.7781              | Fe I  | $3d^7(^4P)4s$          | $3d^7(^2G)4p$           | [2]       |
|     |                 |                  | 316.785483            | Fe II | $3d^6(^3G)4s$          | $3d^6(^3H)4p$           | [1]       |
|     |                 |                  | 316.785483            | Fe II | $3d^6(^5D)4p$          | $3d^6(^5D)5s$           | [1]       |
|     |                 |                  | 316.79206             | Fe I  | $3d^6(^5D)4s4p(^3P^o)$ | $3d^6(^5D)4s(^4D)4d$    | [2]       |
| 682 | 316.817         | 59               | 316.8142              | Fe I  | $3d^6(^5D)4s4p(^3P^o)$ | $3d^6(^5D)4s(^6D)6s$    | [2]       |
|     |                 |                  | 316.818               | Fe II | $3d^6(^1)4p$           | $3d^6(^3F2)4d$          | [1]       |
| 683 | 317.221         | 40               | 317.20835             | Fe I  | $3d^7(^4P)4s$          | $3d^7(^2G)4p$           | [2]       |
|     |                 |                  | 317.21118             | Fe I  | $3d^7(^4P)4s$          | $3d^6(^3F2)4s4p(^3P^o)$ | [2]       |
|     |                 |                  | 317.229               | Fe I  | $3d^7(^2G)4s$          | $3d^7(^2D2)4p$          | [2]       |
| 684 | 317.363         | 42               | 317.36063             | Fe I  | $3d^6(^5D)4s4p(^3P^o)$ | $3d^6(^5D)4s(^6D)6s$    | [2]       |
|     |                 |                  | 317.36876             | Fe I  | $3d^7(^2G)4s$          | $3d^6(^3G)4s4p(^3P^o)$  | [2]       |
| 685 | 317.542         | 89               | 317.53117             | Fe I  | $3d^7(^4F)4s$          | $3d^6(^3H)4s4p(^3P^o)$  | [2]       |
|     |                 |                  | 317.5312              | Fe I  | $3d^7(^2D2)4s$         | $3d^6(^3D)4s4p(^3P^o)$  | [2]       |
|     |                 |                  | 317.538               | Fe I  | $3d^6(^5D)4s4p(^3P^o)$ | $3d^64s(^6D)6s$         | [2]       |
|     |                 |                  | 317.54445             | Fe I  | $3d^6(^5D)4s4p(^3P^o)$ | $3d^6(^5D)4s(^6D)4d$    | [2]       |
| 686 | 317.803         | 77               | 317.80126             | Fe I  | $3d^6(^5D)4s4p(^3P^o)$ | $3d^6(^5D)4s(^6D)4d$    | [2]       |
|     |                 |                  | 317.817               | Fe I  | $3d^64s^2$             | $3d^6(^5D)4s(^6D)5p$    | [2]       |
| 687 | 317.898         | 32               | 317.89619             | Fe I  | $3d^64s^2$             | $3d^6(^3G)4s4p(^3P^o)$  | [2]       |
|     |                 |                  | 317.9047              | Fe I  | $3d^6(^5D)4s4p(^3P^o)$ | $3d^64s(^6D)7s$         | [2]       |



| No. | Wavelength (nm) | Intensity (a.u.) | Wavelength (nm), Ref. | Type  | Lower energy level     | Higher energy level      | Reference |
|-----|-----------------|------------------|-----------------------|-------|------------------------|--------------------------|-----------|
| 688 | 318.029         | 246              | 318.0154              | Fe II | $3d^6(^1D_2)4s$        | $3d^6(^3G)4p$            | [1]       |
|     |                 |                  | 318.02231             | Fe I  | $3d^6(^5D)4s4p(^3P^o)$ | $3d^6(^5D)4s(^6D)4d$     | [2]       |
| 689 | 318.183         | 79               | 318.1749              | Fe I  | $3d^6(^5D)4s4p(^3P^o)$ | $3d^64s(^4D)4d$          | [2]       |
|     |                 |                  | 318.1847              | Fe I  | $3d^6(^5D)4s4p(^3P^o)$ | $3d^6(^5D)4s(^6D)6s$     | [2]       |
|     |                 |                  | 318.19112             | Fe I  | $3d^6(^5D)4s4p(^3P^o)$ | $3d^6(^5D)4s(^6D)4d$     | [2]       |
|     |                 |                  | 318.1924              | Fe I  | $3d^7(^2P)4s$          | $3d^7(^2D_2)4p$          | [2]       |
| 690 | 318.207         | 29               | 318.1924              | Fe I  | $3d^7(^2P)4s$          | $3d^7(^2D_2)4p$          | [2]       |
|     |                 |                  | 318.20553             | Fe I  | $3d^6(^5D)4s4p(^3P^o)$ | $3d^6(^5D)4s(^6D)4d$     | [2]       |
| 691 | 318.302         | 30               | 318.2973              | Fe I  | $3d^6(^5D)4s4p(^3P^o)$ | $3d^6(^5D)4s(^6D)6s$     | [2]       |
|     |                 |                  | 318.2973              | Fe I  | $3d^7(^4P)4s$          | $3d^6(^3F_2)4s4p(^3P^o)$ | [2]       |
|     |                 |                  | 318.30682             | Fe II | $3d^6(^3G)4s$          | $3d^5(^6S)4s4p(^3P^o)$   | [1]       |
|     |                 |                  | 318.3109              | Fe I  | $3d^64s^2$             | $3d^6(^1G_2)4s4p(^3P^o)$ | [2]       |
|     |                 |                  | 318.31136             | Fe II | $3d^7$                 | $3d^6(^5D)4p$            | [1]       |
| 692 | 319.086         | 38               | 319.08165             | Fe I  | $3d^7(^2G)4s$          | $3d^6(^1G_2)4s4p(^3P^o)$ | [2]       |
|     |                 |                  | 319.0932              | Fe I  | $3d^7(^2G)4s$          | $3d^7(^4F)5p$            | [2]       |
| 693 | 319.324         | 3765             | 319.32257             | Fe I  | $3d^64s^2$             | $3d^6(^5D)4s4p(^3P^o)$   | [2]       |
|     |                 |                  | 319.32996             | Fe I  | $3d^6(^5D)4s4p(^3P^o)$ | $3d^6(^5D)4s(^6D)4d$     | [2]       |
| 694 | 319.383         | 48               | 319.373               | Fe I  | $3d^7(^2D_2)4s$        | $3d^6(^3D)4s4p(^3P^o)$   | [2]       |
|     |                 |                  | 319.38006             | Fe II | $3d^7$                 | $3d^6(^5D)4p$            | [1]       |
|     |                 |                  | 319.38568             | Fe II | $3d^6(^3G)4s$          | $3d^6(^3F_2)4p$          | [1]       |
|     |                 |                  | 319.3979              | Fe II | $3d^6(^3D)4p$          | $3d^6(^5D)5d$            | [1]       |
| 695 | 319.455         | 80               | 319.44236             | Fe I  | $3d^6(^5D)4s4p(^3P^o)$ | $3d^6(^5D)4s(^6D)4d$     | [2]       |
|     |                 |                  | 319.45936             | Fe I  | $3d^6(^5D)4s4p(^3P^o)$ | $3d^6(^5D)4s(^6D)6s$     | [2]       |
| 696 | 319.514         | 27               | 319.507               | Fe I  | $3d^6(^5D)4s4p(^3P^o)$ | $3d^64s(^6D)7s$          | [2]       |
|     |                 |                  | 319.523               | Fe I  | $3d^6(^5D)4s4p(^3P^o)$ | $3d^64s(^4D)4d$          | [2]       |
| 697 | 319.609         | 41               | 319.59592             | Fe I  | $3d^64s^2$             | $3d^6(^3G)4s4p(^3P^o)$   | [2]       |
|     |                 |                  | 319.60712             | Fe II | $3d^7$                 | $3d^6(^5D)4p$            | [1]       |
|     |                 |                  | 319.61224             | Fe I  | $3d^6(^5D)4s4p(^3P^o)$ | $3d^6(^5D)4s(^6D)6s$     | [2]       |
| 698 | 319.692         | 1251             | 319.69272             | Fe I  | $3d^6(^5D)4s4p(^3P^o)$ | $3d^6(^5D)4s(^6D)4d$     | [2]       |
|     |                 |                  | 319.69866             | Fe I  | $3d^64s^2$             | $3d^6(^5D)4s4p(^3P^o)$   | [2]       |
|     |                 |                  | 319.7001              | Fe II | $3d^6(^5D)4p$          | $3d^6(^5D)5s$            | [1]       |
| 699 | 319.953         | 393              | 319.94994             | Fe I  | $3d^64s^2$             | $3d^6(^5D)4s4p(^3P^o)$   | [2]       |
|     |                 |                  | 319.95302             | Fe I  | $3d^6(^5D)4s4p(^3P^o)$ | $3d^6(^5D)4s(^6D)4d$     | [2]       |
|     |                 |                  | 319.9653              | Fe I  | $3d^6(^5D)4s4p(^3P^o)$ | $3d^64s(^4D)4d$          | [2]       |
| 700 | 320.048         | 403              | 320.04713             | Fe I  | $3d^6(^5D)4s4p(^3P^o)$ | $3d^6(^5D)4s(^6D)4d$     | [2]       |
|     |                 |                  | 320.0474              | Fe I  | $3d^6(^5D)4s4p(^3P^o)$ | $3d^6(^5D)4s(^6D)4d$     | [2]       |

| No. | Wavelength (nm) | Intensity (a.u.) | Wavelength (nm), Ref. | Type  | Lower energy level     | Higher energy level    | Reference |
|-----|-----------------|------------------|-----------------------|-------|------------------------|------------------------|-----------|
| 701 | 320.535         | 140              | 320.521               | Fe I  | $3d^6(^5D)4s4p(^3P^o)$ | $3d^7(^4F)4d$          | [2]       |
|     |                 |                  | 320.53978             | Fe I  | $3d^6(^5D)4s4p(^3P^o)$ | $3d^6(^5D)4s(^6D)4d$   | [2]       |
| 702 | 320.844         | 49               | 320.84704             | Fe I  | $3d^6(^5D)4s4p(^3P^o)$ | $3d^6(^5D)4s(^4D)4d$   | [2]       |
|     |                 |                  | 320.8583              | Fe II | $3d^6(^5D)4p$          | $3d^54s^2$             | [1]       |
| 703 | 320.927         | 201              | 320.92979             | Fe I  | $3d^6(^5D)4s4p(^3P^o)$ | $3d^6(^5D)4s(^4D)4d$   | [2]       |
|     |                 |                  | 320.92979             | Fe I  | $3d^6(^5D)4s4p(^3P^o)$ | $3d^6(^5D)4s(^6D)6s$   | [2]       |
| 704 | 321.022         | 165              | 321.01863             | Fe I  | $3d^64s^2$             | $3d^7(^2P)4p$          | [2]       |
|     |                 |                  | 321.02289             | Fe I  | $3d^6(^5D)4s4p(^3P^o)$ | $3d^6(^5D)4s(^6D)4d$   | [2]       |
| 705 | 321.082         | 174              | 321.082894            | Fe II | $3d^6(^5D)4p$          | $3d^6(^5D)5s$          | [1]       |
|     |                 |                  | 321.0829              | Fe I  | $3d^6(^5D)4s4p(^3P^o)$ | $3d^6(^5D)4s(^6D)4d$   | [2]       |
| 706 | 321.165         | 374              | 321.16073             | Fe I  | $3d^6(^5D)4s4p(^3P^o)$ | $3d^6(^5D)4s(^6D)6s$   | [2]       |
|     |                 |                  | 321.16772             | Fe I  | $3d^6(^5D)4s4p(^3P^o)$ | $3d^6(^5D)4s(^4D)4d$   | [2]       |
| 707 | 321.2           | 794              | 321.18749             | Fe I  | $3d^6(^5D)4s4p(^3P^o)$ | $3d^6(^5D)4s(^4D)4d$   | [2]       |
|     |                 |                  | 321.19871             | Fe I  | $3d^6(^5D)4s4p(^3P^o)$ | $3d^6(^5D)4s(^6D)4d$   | [2]       |
|     |                 |                  | 321.1995              | Fe I  | $3d^6(^5D)4s4p(^3P^o)$ | $3d^64s(^6D)7s$        | [2]       |
| 708 | 321.402         | 1680             | 321.4012              | Fe I  | $3d^6(^5D)4s4p(^3P^o)$ | $3d^6(^5D)4s(^6D)4d$   | [2]       |
|     |                 |                  | 321.4012              | Fe I  | $3d^6(^5D)4s4p(^3P^o)$ | $3d^6(^5D)4s(^4D)4d$   | [2]       |
|     |                 |                  | 321.40614             | Fe I  | $3d^6(^5D)4s4p(^3P^o)$ | $3d^6(^5D)4s(^6D)4d$   | [2]       |
|     |                 |                  | 321.4082              | Fe II | $3d^6(^1G_2)4p$        | $3d^6(^5D)5d$          | [1]       |
| 709 | 321.592         | 337              | 321.58332             | Fe I  | $3d^6(^5D)4s4p(^3P^o)$ | $3d^64s(^4D)4d$        | [2]       |
|     |                 |                  | 321.59378             | Fe I  | $3d^6(^5D)4s4p(^3P^o)$ | $3d^6(^5D)4s(^6D)4d$   | [2]       |
|     |                 |                  | 321.5985              | Fe I  | $3d^7(^2G)4s$          | $3d^7(^4F)5p$          | [2]       |
|     |                 |                  | 321.5985              | Fe I  | $3d^6(^5D)4s4p(^3P^o)$ | $3d^64s(^6D)7s$        | [2]       |
|     |                 |                  | 321.605               | Fe I  | $3d^7(^2D_2)4s$        | $3d^6(^3D)4s4p(^3P^o)$ | [2]       |
| 710 | 321.984         | 428              | 321.9766              | Fe I  | $3d^64s^2$             | $3d^6(^5D)4s4p(^3P^o)$ | [2]       |
|     |                 |                  | 321.98043             | Fe I  | $3d^6(^5D)4s4p(^3P^o)$ | $3d^6(^5D)4s(^6D)4d$   | [2]       |
| 711 | 322.21          | 2480             | 322.2058              | Fe I  | $3d^64s^2$             | $3d^7(^2H)4p$          | [2]       |
|     |                 |                  | 322.20669             | Fe I  | $3d^6(^5D)4s4p(^3P^o)$ | $3d^6(^5D)4s(^6D)4d$   | [2]       |
| 712 | 322.483         | 704              | 322.4681              | Fe II | $3d^6(^1F)4p$          | $3d^6(^5D)6d$          | [1]       |
|     |                 |                  | 322.4802              | Fe II | $3d^6(^1I)4s$          | $3d^6(^3F_2)4p$        | [1]       |
|     |                 |                  | 322.49238             | Fe I  | $3d^7(^4P)4s$          | $3d^7(^4F)5p$          | [2]       |
| 713 | 322.708         | 264              | 322.6987              | Fe II | $3d^6(^3D)4p$          | $3d^6(^3F_2)4d$        | [1]       |
|     |                 |                  | 322.70609             | Fe I  | $3d^6(^5D)4s4p(^3P^o)$ | $3d^6(^5D)4s(^6D)4d$   | [2]       |
| 714 | 322.779         | 653              | 322.774324            | Fe II | $3d^7$                 | $3d^6(^5D)4p$          | [1]       |
|     |                 |                  | 322.77953             | Fe I  | $3d^6(^5D)4s4p(^3P^o)$ | $3d^6(^5D)4s(^6D)4d$   | [2]       |
| 715 | 322.827         | 130              | 322.82487             | Fe I  | $3d^6(^5D)4s4p(^3P^o)$ | $3d^6(^5D)4s(^6D)4d$   | [2]       |

| No. | Wavelength (nm) | Intensity (a.u.) | Wavelength (nm), Ref. | Type  | Lower energy level     | Higher energy level     | Reference |
|-----|-----------------|------------------|-----------------------|-------|------------------------|-------------------------|-----------|
|     |                 |                  | 322.8396              | Fe I  | $3d^7(^4P)4s$          | $3d^6(^3D)4s4p(^3P^o)$  | [2]       |
| 716 | 322.957         | 1084             | 322.957               | Fe I  | $3d^6(^5D)4s4p(^3P^o)$ | $3d^6(^5D)4s(^6D)6s$    | [2]       |
|     |                 |                  | 322.9612              | Fe I  | $3d^7(^2G)4s$          | $3d^6(^3G)4s4p(^3P^o)$  | [2]       |
| 717 | 323.005         | 4980             | 322.9955              | Fe I  | $3d^64s^2$             | $3d^7(^2H)4p$           | [2]       |
|     |                 |                  | 322.99906             | Fe I  | $3d^7(^2G)4s$          | $3d^6(^1G2)4s4p(^3P^o)$ | [2]       |
|     |                 |                  | 323.0096              | Fe I  | $3d^7(^4F)4s$          | $3d^7(^4F)4p$           | [2]       |
|     |                 |                  | 323.01561             | Fe I  | $3d^6(^5D)4s4p(^3P^o)$ | $3d^6(^5D)4s(^6D)4d$    | [2]       |
| 718 | 323.301         | 178              | 323.2937              | Fe I  | $3d^7(^2D2)4s$         | $3d^64s(^6D)6p$         | [2]       |
|     |                 |                  | 323.30516             | Fe I  | $3d^7(^2H)4s$          | $3d^6(^1I)4s4p(^3P^o)$  | [2]       |
| 719 | 323.456         | 259              | 323.4449              | Fe I  | $3d^6(^5D)4s4p(^3P^o)$ | $3d^7(^4F)6s$           | [2]       |
|     |                 |                  | 323.4613              | Fe I  | $3d^64s^2$             | $3d^6(^5D)4s4p(^3P^o)$  | [2]       |
| 720 | 323.942         | 755              | 323.9307              | Fe I  | $3d^6(^5D)4s4p(^3P^o)$ | $3d^64s(^6D)5d$         | [2]       |
|     |                 |                  | 323.9344              | Fe I  | $3d^7(^4P)4s$          | $3d^7(^2P)4p$           | [2]       |
|     |                 |                  | 323.94327             | Fe I  | $3d^6(^5D)4s4p(^3P^o)$ | $3d^6(^5D)4s(^6D)4d$    | [2]       |
|     |                 |                  | 323.94571             | Fe I  | $3d^6(^5D)4s4p(^3P^o)$ | $3d^6(^5D)4s(^6D)4d$    | [2]       |
| 721 | 324.038         | 27               | 324.0362              | Fe I  | $3d^7(^2P)4s$          | $3d^64s(^4D)5p$         | [2]       |
|     |                 |                  | 324.0363              | Fe II | $3d^6(^5D)4d$          | $3d^6(^3G)5p$           | [1]       |
| 722 | 324.287         | 43               | 324.2986              | Fe I  | $3d^6(^5D)4s4p(^3P^o)$ | $3d^64s(^6D)5d$         | [2]       |
| 723 | 324.311         | 30               | 324.2986              | Fe I  | $3d^6(^5D)4s4p(^3P^o)$ | $3d^64s(^6D)5d$         | [2]       |
|     |                 |                  | 324.31082             | Fe I  | $3d^64s^2$             | $3d^6(^3F2)4s4p(^3P^o)$ | [2]       |
| 724 | 324.608         | 211              | 324.59655             | Fe I  | $3d^7(^4F)4s$          | $3d^7(^4F)4p$           | [2]       |
|     |                 |                  | 324.60046             | Fe I  | $3d^64s^2$             | $3d^6(^5D)4s4p(^3P^o)$  | [2]       |
| 725 | 324.726         | 120              | 324.71769             | Fe II | $3d^6(^3D)4s$          | $3d^6(^3F2)4p$          | [1]       |
|     |                 |                  | 324.72098             | Fe I  | $3d^64s^2$             | $3d^7(^2H)4p$           | [2]       |
|     |                 |                  | 324.72799             | Fe I  | $3d^6(^5D)4s4p(^3P^o)$ | $3d^6(^5D)4s(^6D)4d$    | [2]       |
|     |                 |                  | 324.7391              | Fe II | $3d^6(^1G2)4s$         | $3d^6(^3F2)4p$          | [1]       |
| 726 | 326.458         | 95               | 326.4512              | Fe I  | $3d^7(^4P)4s$          | $3d^6(^3G)4s4p(^3P^o)$  | [2]       |
|     |                 |                  | 326.46944             | Fe I  | $3d^6(^5D)4s4p(^3P^o)$ | $3d^6(^5D)4s(^6D)4d$    | [2]       |
| 727 | 326.565         | 159              | 326.55431             | Fe I  | $3d^7(^2G)4s$          | $3d^7(^2H)4p$           | [2]       |
|     |                 |                  | 326.56163             | Fe I  | $3d^7(^4P)4s$          | $3d^5(^6S)4s^24p$       | [2]       |
| 728 | 327.099         | 141              | 327.099964            | Fe II | $3d^6(^5D)4d$          | $3d^6(^5D_1)5f$         | [1]       |
|     |                 |                  | 327.09997             | Fe I  | $3d^7(^4P)4s$          | $3d^5(^6S)4s^24p$       | [2]       |
| 729 | 328.285         | 36               | 328.28901             | Fe I  | $3d^7(^2D2)4s$         | $3d^6(^1G2)4s4p(^3P^o)$ | [2]       |
|     |                 |                  | 328.28901             | Fe II | $3d^6(^3D)4p$          | $3d^6(^3P2)4d$          | [1]       |
| 730 | 330.598         | 439              | 330.58519             | Fe I  | $3d^6(^5D)4s4p(^3P^o)$ | $3d^6(^5D)4s(^6D)6s$    | [2]       |
|     |                 |                  | 330.59705             | Fe I  | $3d^7(^4P)4s$          | $3d^5(^6S)4s^24p$       | [2]       |

| No. | Wavelength (nm) | Intensity (a.u.) | Wavelength (nm), Ref. | Type  | Lower energy level     | Higher energy level      | Reference |
|-----|-----------------|------------------|-----------------------|-------|------------------------|--------------------------|-----------|
|     |                 |                  | 330.60806             | Fe I  | $3d^6 4s^2$            | $3d^7(^4F)5p$            | [2]       |
| 731 | 330.633         | 557              | 330.63393             | Fe I  | $3d^7(^2G)4s$          | $3d^6(^3G)4s4p(^3P^o)$   | [2]       |
|     |                 |                  | 330.63545             | Fe I  | $3d^7(^4P)4s$          | $3d^5(^6S)4s^2 4p$       | [2]       |
| 732 | 330.716         | 142              | 330.71448             | Fe II | $3d^6(^5D)5s$          | $3d^6(^3F_2)5p$          | [1]       |
|     |                 |                  | 330.72334             | Fe I  | $3d^7(^2H)4s$          | $3d^6(^1I)4s4p(^3P^o)$   | [2]       |
| 733 | 331.048         | 25               | 331.0341              | Fe I  | $3d^6 4s^2$            | $3d^6(^3G)4s4p(^3P^o)$   | [2]       |
|     |                 |                  | 331.04905             | Fe I  | $3d^7(^2D_2)4s$        | $3d^6(^1I)4s4p(^3P^o)$   | [2]       |
| 734 | 331.463         | 75               | 331.474099            | Fe II | $3d^6(^5D)5s$          | $3d^5(^2F_1)4s4p(^3P^o)$ | [1]       |
|     |                 |                  | 331.47411             | Fe I  | $3d^7(^2D_2)4s$        | $3d^6(^1G_2)4s4p(^3P^o)$ | [2]       |
| 735 | 333.574         | 84               | 333.57153             | Fe I  | $3d^7(^2G)4s$          | $3d^7(^2P)4p$            | [2]       |
|     |                 |                  | 333.57682             | Fe I  | $3d^7(^4P)4s$          | $3d^7(^2D_2)4p$          | [2]       |
| 736 | 333.977         | 190              | 333.9688              | Fe II | $3d^6(^3D)4p$          | $3d^6(^3G)5s$            | [1]       |
|     |                 |                  | 333.9798              | Fe II | $3d^6(^5D)4d$          | $3d^6(^5D_4)5f$          | [1]       |
| 737 | 336.679         | 92               | 336.67852             | Fe I  | $3d^7(^2G)4s$          | $3d^6(^3G)4s4p(^3P^o)$   | [2]       |
|     |                 |                  | 336.68637             | Fe I  | $3d^7(^4P)4s$          | $3d^6(^3P_2)4s4p(^3P^o)$ | [2]       |
| 738 | 336.715         | 538              | 336.71538             | Fe I  | $3d^6 4s^2$            | $3d^6(^3F_2)4s4p(^3P^o)$ | [2]       |
|     |                 |                  | 336.72159             | Fe I  | $3d^6(^5D)4s4p(^3P^o)$ | $3d^6 4s(^6D)5d$         | [2]       |
| 739 | 337.2           | 51               | 337.20735             | Fe II | $3d^6(^5D)4d$          | $3d^6(^5D_2)5f$          | [1]       |
|     |                 |                  | 337.20736             | Fe I  | $3d^7(^4P)4s$          | $3d^6(^3F_2)4s4p(^3P^o)$ | [2]       |
| 740 | 337.414         | 41               | 337.41917             | Fe II | $3d^6(^5D)4d$          | $3d^6(^5D_3)5f$          | [1]       |
|     |                 |                  | 337.41918             | Fe I  | $3d^7(^4P)4s$          | $3d^7(^4P)4p$            | [2]       |
| 741 | 337.888         | 76               | 337.87329             | Fe I  | $3d^6 4s^2$            | $3d^5(^6S)4s^2 4p$       | [2]       |
|     |                 |                  | 337.90177             | Fe I  | $3d^7(^4P)4s$          | $3d^7(^4P)4p$            | [2]       |
| 742 | 338.089         | 154              | 338.07466             | Fe I  | $3d^7(^2P)4s$          | $3d^7(^4F)5p$            | [2]       |
|     |                 |                  | 338.1003              | Fe II | $3d^6(^1F)4s$          | $3d^6(^3D)4p$            | [5]       |
| 743 | 338.765         | 27               | 338.7617              | Fe I  | $3d^6(^5D)4s4p(^3P^o)$ | $3d^6 4s(^4D)4d$         | [2]       |
|     |                 |                  | 338.7617              | Fe I  | $3d^6(^5D)4s4p(^3P^o)$ | $3d^6 4s(^6D)5d$         | [2]       |
| 744 | 339.926         | 333              | 339.9228              | Fe I  | $3d^7(^2G)4s$          | $3d^6(^3G)4s4p(^3P^o)$   | [2]       |
|     |                 |                  | 339.93329             | Fe I  | $3d^7(^4P)4s$          | $3d^7(^4P)4p$            | [2]       |
| 745 | 340.423         | 296              | 340.427               | Fe I  | $3d^7(^4F)4s$          | $3d^7(^4F)4p$            | [2]       |
|     |                 |                  | 340.43006             | Fe I  | $3d^7(^2G)4s$          | $3d^7(^2D_2)4p$          | [2]       |
|     |                 |                  | 340.43537             | Fe I  | $3d^7(^4P)4s$          | $3d^6(^3F_2)4s4p(^3P^o)$ | [2]       |
| 746 | 340.577         | 32               | 340.58311             | Fe II | $3d^6(^5D)4d$          | $3d^6(^5D_3)5f$          | [1]       |
|     |                 |                  | 340.58312             | Fe I  | $3d^7(^2G)4s$          | $3d^6(^3G)4s4p(^3P^o)$   | [2]       |
| 747 | 340.684         | 391              | 340.67992             | Fe I  | $3d^7(^4P)4s$          | $3d^7(^4P)4p$            | [2]       |
|     |                 |                  | 340.6832              | Fe I  | $3d^6(^5D)4s4p(^3P^o)$ |                          | [2]       |

| No. | Wavelength (nm) | Intensity (a.u.) | Wavelength (nm), Ref. | Type  | Lower energy level     | Higher energy level      | Reference |
|-----|-----------------|------------------|-----------------------|-------|------------------------|--------------------------|-----------|
| 748 | 340.743         | 2727             | 340.74594             | Fe I  | $3d^7(^4P)4s$          | $3d^6(^3F_2)4s4p(^3P^o)$ | [2]       |
|     |                 |                  | 340.75315             | Fe I  | $3d^7(^4P)4s$          | $3d^7(^4P)4p$            | [2]       |
| 749 | 341.015         | 36               | 341.00275             | Fe I  | $3d^7(^2G)4s$          | $3d^6(^3D)4s4p(^3P^o)$   | [2]       |
|     |                 |                  | 341.0169              | Fe I  | $3d^7(^2P)4s$          | $3d^6(^1G_2)4s4p(^3P^o)$ | [2]       |
| 750 | 341.596         | 29               | 341.6021              | Fe II | $3d^7$                 | $3d^6(^5D)4p$            | [5]       |
|     |                 |                  | 341.6046              | Fe I  | $3d^6(^5D)4s4p(^3P^o)$ | $3d^64s(^6D)5d$          | [2]       |
|     |                 |                  | 341.6046              | Fe II | $3d^54s^2$             | $3d^5(^6S)4s4p(^3P^o)$   | [1]       |
| 751 | 342.259         | 448              | 342.24922             | Fe I  | $3d^7(^2G)4s$          | $3d^7(^4F)5p$            | [2]       |
|     |                 |                  | 342.26557             | Fe I  | $3d^7(^4P)4s$          | $3d^7(^4P)4p$            | [2]       |
| 752 | 342.638         | 106              | 342.63241             | Fe I  | $3d^64s^2$             | $3d^7(^4P)4p$            | [2]       |
|     |                 |                  | 342.6382              | Fe I  | $3d^7(^4F)4s$          | $3d^7(^4F)4p$            | [2]       |
|     |                 |                  | 342.6382              | Fe I  | $3d^7(^4P)4s$          | $3d^6(^3P_2)4s4p(^3P^o)$ | [2]       |
| 753 | 342.662         | 132              | 342.66278             | Fe I  | $3d^7(^4P)4s$          | $3d^6(^3P_2)4s4p(^3P^o)$ | [2]       |
|     |                 |                  | 342.66656             | Fe I  | $3d^7(^2H)4s$          | $3d^6(^1G_2)4s4p(^3P^o)$ | [2]       |
| 754 | 342.709         | 2307             | 342.69877             | Fe I  | $3d^7(^4F)4s$          | $3d^6(^5D)4s4p(^1P^o)$   | [2]       |
|     |                 |                  | 342.71193             | Fe I  | $3d^7(^4P)4s$          | $3d^7(^4P)4p$            | [2]       |
| 755 | 342.816         | 272              | 342.81367             | Fe II | $3d^6(^5D)4d$          | $3d^6(^5D_1)5f$          | [1]       |
|     |                 |                  | 342.81924             | Fe I  | $3d^7(^4P)4s$          | $3d^7(^4P)4p$            | [2]       |
|     |                 |                  | 342.82272             | Fe II | $3d^6(^5D)4p$          | $3d^54s^2$               | [1]       |
| 756 | 343.171         | 30               | 343.18114             | Fe I  | $3d^7(^4P)4s$          | $3d^7(^2P)4p$            | [2]       |
|     |                 |                  | 343.18425             | Fe I  | $3d^7(^2D_2)4s$        | $3d^7(^2D_2)4p$          | [2]       |
| 757 | 343.787         | 35               | 343.79486             | Fe I  | $3d^7(^2H)4s$          | $3d^6(^1G_2)4s4p(^3P^o)$ | [2]       |
|     |                 |                  | 343.79486             | Fe II | $3d^6(^3D)4p$          | $3d^6(^3F_2)4d$          | [1]       |
| 758 | 344.237         | 124              | 344.2239              | Fe II | $3d^7$                 | $3d^6(^3H)4p$            | [5]       |
|     |                 |                  | 344.23616             | Fe I  | $3d^64s^2$             | $3d^6(^3P_2)4s4p(^3P^o)$ | [2]       |
| 759 | 345.705         | 41               | 345.6926              | Fe II | $3d^6(^3D)4s$          | $3d^6(^3P_2)4p$          | [1]       |
|     |                 |                  | 345.70867             | Fe I  | $3d^6(^5D)4s4p(^3P^o)$ | $3d^6(^5D)4s(^4D)4d$     | [2]       |
| 760 | 346.881         | 47               | 346.86792             | Fe II | $3d^6(^1G_2)4s$        | $3d^6(^3H)4p$            | [1]       |
|     |                 |                  | 346.88442             | Fe I  | $3d^64s^2$             | $3d^7(^2G)4p$            | [2]       |
| 761 | 347.675         | 6165             | 347.67016             | Fe I  | $3d^64s^2$             | $3d^6(^5D)4s4p(^3P^o)$   | [2]       |
|     |                 |                  | 347.68541             | Fe I  | $3d^64s^2$             | $3d^7(^2G)4p$            | [2]       |
| 762 | 347.864         | 49               | 347.86226             | Fe I  | $3d^7(^2G)4s$          | $3d^6(^3G)4s4p(^3P^o)$   | [2]       |
|     |                 |                  | 347.86639             | Fe II | $3d^6(^5D)4p$          | $3d^54s^2$               | [1]       |
| 763 | 349.059         | 63084            | 349.05738             | Fe I  | $3d^64s^2$             | $3d^6(^5D)4s4p(^3P^o)$   | [2]       |
|     |                 |                  | 349.06283             | Fe II | $3d^6(^5D)4p$          | $3d^54s^2$               | [1]       |
| 764 | 349.71          | 339              | 349.70028             | Fe I  | $3d^7(^2G)4s$          | $3d^7(^2G)4p$            | [2]       |

| No. | Wavelength (nm) | Intensity (a.u.) | Wavelength (nm), Ref. | Type  | Lower energy level     | Higher energy level    | Reference |
|-----|-----------------|------------------|-----------------------|-------|------------------------|------------------------|-----------|
|     |                 |                  | 349.71031             | Fe I  | $3d^7(^4P)4s$          | $3d^7(^4P)4p$          | [2]       |
|     |                 |                  | 349.7148              | Fe I  | $3d^7(^4P)4s$          | $3d^7(^4P)4p$          | [2]       |
| 765 | 349.781         | 8780             | 349.78403             | Fe I  | $3d^64s^2$             | $3d^6(^5D)4s4p(^3P^o)$ | [2]       |
|     |                 |                  | 349.78867             | Fe I  | $3d^7(^2P)4s$          | $3d^7(^2D)4p$          | [2]       |
|     |                 |                  | 349.79593             | Fe I  | $3d^6(^5D)4s4p(^3P^o)$ | $3d^64s(^6D)6s$        | [2]       |
| 766 | 350.479         | 57               | 350.47145             | Fe II | $3d^6(^5D)4d$          | $3d^6(^3F)5p$          | [1]       |
|     |                 |                  | 350.4861              | Fe I  | $3d^64s^2$             | $3d^6(^3P)4s4p(^3P^o)$ | [2]       |
| 767 | 350.656         | 85               | 350.64975             | Fe I  | $3d^64s^2$             | $3d^7(^4P)4p$          | [2]       |
|     |                 |                  | 350.658               | Fe I  | $3d^6(^5D)4s4p(^3P^o)$ | $3d^6(^5D)4s(^6D)4d$   | [2]       |
| 768 | 350.857         | 51               | 350.84743             | Fe I  | $3d^64s^2$             | $3d^7(^2H)4p$          | [2]       |
|     |                 |                  | 350.8518              | Fe I  | $3d^64s^2$             | $3d^6(^3F)4s4p(^3P^o)$ | [2]       |
|     |                 |                  | 350.8565              | Fe II | $3d^6(^5D)4d$          | $3d^6(^5D)5f$          | [1]       |
| 769 | 351.626         | 66               | 351.63043             | Fe II | $3d^6(^5D)4p$          | $3d^54s^2$             | [1]       |
|     |                 |                  | 351.64087             | Fe I  | $3d^64s^2$             | $3d^7(^2H)4p$          | [2]       |
| 770 | 351.862         | 53               | 351.85889             | Fe II | $3d^6(^5D)4p$          | $3d^54s^2$             | [1]       |
|     |                 |                  | 351.86826             | Fe I  | $3d^6(^5D)4s4p(^3P^o)$ | $3d^6(^5D)4s(^6D)4d$   | [2]       |
| 771 | 352.418         | 139              | 352.40739             | Fe I  | $3d^64s^2$             | $3d^6(^3F)4s4p(^3P^o)$ | [2]       |
|     |                 |                  | 352.42395             | Fe I  | $3d^64s^2$             | $3d^7(^4P)4p$          | [2]       |
| 772 | 352.607         | 7740             | 352.60406             | Fe I  | $3d^64s^2$             | $3d^6(^5D)4s4p(^3P^o)$ | [2]       |
|     |                 |                  | 352.61245             | Fe II | $3d^6(^5D)4p$          | $3d^54s^2$             | [1]       |
|     |                 |                  | 352.61656             | Fe I  | $3d^7(^4F)4s$          | $3d^7(^4F)4p$          | [2]       |
| 773 | 352.784         | 195              | 352.77926             | Fe I  | $3d^6(^5D)4s4p(^3P^o)$ | $3d^6(^5D)4s(^6D)4d$   | [2]       |
|     |                 |                  | 352.78895             | Fe I  | $3d^7(^2G)4s$          | $3d^7(^2G)4p$          | [2]       |
| 774 | 354.108         | 1856             | 354.0959              | Fe II | $3d^6(^5D)4d$          | $3d^6(^5D)5f$          | [1]       |
|     |                 |                  | 354.10831             | Fe I  | $3d^6(^5D)4s4p(^3P^o)$ | $3d^6(^5D)4s(^6D)4d$   | [2]       |
| 775 | 354.214         | 1260             | 354.20754             | Fe I  | $3d^6(^5D)4s4p(^3P^o)$ | $3d^6(^5D)4s(^6D)4d$   | [2]       |
|     |                 |                  | 354.22432             | Fe I  | $3d^64s^2$             | $3d^6(^3P)4s4p(^3P^o)$ | [2]       |
| 776 | 355.289         | 53               | 355.28277             | Fe I  | $3d^6(^5D)4s4p(^3P^o)$ | $3d^6(^5D)4s(^6D)4d$   | [2]       |
|     |                 |                  | 355.28549             | Fe I  | $3d^7(^2P)4s$          | $3d^7(^2D)4p$          | [2]       |
| 777 | 355.69          | 1339             | 355.68776             | Fe I  | $3d^6(^5D)4s4p(^3P^o)$ | $3d^6(^5D)4s(^6D)4d$   | [2]       |
|     |                 |                  | 355.694               | Fe II | $3d^6(^5D)4p$          | $3d^54s^2$             | [1]       |
| 778 | 355.856         | 5610             | 355.8412              | Fe I  | $3d^64s^2$             | $3d^7(^2D)4p$          | [2]       |
|     |                 |                  | 355.85148             | Fe I  | $3d^7(^4F)4s$          | $3d^7(^4F)4p$          | [2]       |
| 779 | 356.458         | 66               | 356.4515              | Fe I  | $3d^64s^2$             | $3d^6(^3F)4s4p(^3P^o)$ | [2]       |
|     |                 |                  | 356.45567             | Fe I  | $3d^64s^2$             | $3d^6(^3F)4s4p(^3P^o)$ | [2]       |
| 780 | 357.012         | 65527            | 357.001               | Fe I  | $3d^64s^2$             | $3d^7(^4P)4p$          | [2]       |

| No. | Wavelength (nm) | Intensity (a.u.) | Wavelength (nm), Ref. | Type  | Lower energy level     | Higher energy level    | Reference |
|-----|-----------------|------------------|-----------------------|-------|------------------------|------------------------|-----------|
|     |                 |                  | 357.00975             | Fe I  | $3d^7(^4F)4s$          | $3d^7(^4F)4p$          | [2]       |
|     |                 |                  | 357.02539             | Fe I  | $3d^6(^5D)4s4p(^3P^o)$ | $3d^6(^5D)4s(^6D)4d$   | [2]       |
| 781 | 357.39          | 361              | 357.38289             | Fe I  | $3d^64s^2$             | $3d^6(^3G)4s4p(^3P^o)$ | [2]       |
|     |                 |                  | 357.38884             | Fe I  | $3d^7(^2H)4s$          | $3d^6(^3G)4s4p(^3P^o)$ | [2]       |
| 782 | 357.532         | 143              | 357.52449             | Fe I  | $3d^6(^5D)4s4p(^3P^o)$ | $3d^6(^5D)4s(^6D)4d$   | [2]       |
|     |                 |                  | 357.53697             | Fe I  | $3d^7(^2P)4s$          | $3d^7(^2P)4p$          | [2]       |
| 783 | 358.464         | 774              | 358.46592             | Fe I  | $3d^7(^2G)4s$          | $3d^7(^2G)4p$          | [2]       |
|     |                 |                  | 358.47855             | Fe I  | $3d^6(^5D)4s4p(^3P^o)$ | $3d^6(^5D)4s(^6D)4d$   | [2]       |
| 784 | 358.865         | 214              | 358.85262             | Fe I  | $3d^6(^5D)4s4p(^3P^o)$ | $3d^6(^5D)4s(^6D)4d$   | [2]       |
|     |                 |                  | 358.8609              | Fe I  | $3d^6(^5D)4s4p(^3P^o)$ | $3d^6(^5D)4s(^6D)4d$   | [2]       |
| 785 | 358.948         | 93               | 358.94517             | Fe I  | $3d^7(^2G)4s$          | $3d^7(^2G)4p$          | [2]       |
|     |                 |                  | 358.96052             | Fe I  | $3d^64s^2$             | $3d^7(^2P)4p$          | [2]       |
| 786 | 359.136         | 32               | 359.13491             | Fe I  | $3d^6(^5D)4s4p(^3P^o)$ | $3d^6(^5D)4s(^6D)4d$   | [2]       |
|     |                 |                  | 359.14838             | Fe I  | $3d^6(^5D)4s4p(^3P^o)$ | $3d^7(^4F)4d$          | [2]       |
| 787 | 359.16          | 31               | 359.14838             | Fe I  | $3d^6(^5D)4s4p(^3P^o)$ | $3d^7(^4F)4d$          | [2]       |
| 788 | 359.702         | 42               | 359.70209             | Fe I  | $3d^6(^5D)4s4p(^3P^o)$ | $3d^7(^4F)4d$          | [2]       |
|     |                 |                  | 359.70523             | Fe I  | $3d^7(^2D2)4s$         | $3d^7(^4F)5p$          | [2]       |
| 789 | 359.879         | 68               | 359.8717              | Fe I  | $3d^7(^2D2)4s$         | $3d^6(^3D)4s4p(^3P^o)$ | [2]       |
|     |                 |                  | 359.8929              | Fe I  | $3d^6(^5D)4s4p(^3P^o)$ | $3d^7(^4F)4d$          | [2]       |
| 790 | 360.257         | 110              | 360.24619             | Fe I  | $3d^6(^5D)4s4p(^3P^o)$ | $3d^6(^5D)4s(^6D)4d$   | [2]       |
|     |                 |                  | 360.252519            | Fe II | $3d^6(^5D)5s$          | $3d^5(^4F)4s4p(^3P^o)$ | [1]       |
|     |                 |                  | 360.25252             | Fe I  | $3d^6(^5D)4s4p(^3P^o)$ | $3d^6(^5D)4s(^6D)4d$   | [2]       |
| 791 | 360.316         | 366              | 360.30884             | Fe I  | $3d^6(^5D)4s4p(^3P^o)$ | $3d^64s(^6D)6s$        | [2]       |
|     |                 |                  | 360.32033             | Fe I  | $3d^7(^2G)4s$          | $3d^7(^2G)4p$          | [2]       |
| 792 | 360.375         | 48               | 360.36808             | Fe I  | $3d^64s^2$             | $3d^7(^2G)4p$          | [2]       |
|     |                 |                  | 360.38177             | Fe I  | $3d^7(^2P)4s$          | $3d^7(^2P)4p$          | [2]       |
| 793 | 360.551         | 1331             | 360.54525             | Fe I  | $3d^7(^2G)4s$          | $3d^7(^2G)4p$          | [2]       |
|     |                 |                  | 360.55004             | Fe I  | $3d^6(^5D)4s4p(^3P^o)$ | $3d^6(^5D)4s(^6D)4d$   | [2]       |
| 794 | 360.669         | 3735             | 360.65995             | Fe I  | $3d^7(^2D2)4s$         | $3d^7(^4F)5p$          | [2]       |
|     |                 |                  | 360.66791             | Fe I  | $3d^7(^2G)4s$          | $3d^7(^2G)4p$          | [2]       |
| 795 | 361.459         | 51               | 361.45554             | Fe I  | $3d^6(^5D)4s4p(^3P^o)$ | $3d^64s(^4D)4d$        | [2]       |
|     |                 |                  | 361.47119             | Fe I  | $3d^7(^2D2)4s$         | $3d^6(^3D)4s4p(^3P^o)$ | [2]       |
| 796 | 361.483         | 72               | 361.47119             | Fe I  | $3d^7(^2D2)4s$         | $3d^6(^3D)4s4p(^3P^o)$ | [2]       |
|     |                 |                  | 361.47721             | Fe I  | $3d^6(^5D)4s4p(^3P^o)$ | $3d^6(^5D)4s(^6D)4d$   | [2]       |
|     |                 |                  | 361.4873              | Fe II | $3d^6(^1G2)4s$         | $3d^6(^3H)4p$          | [5]       |
| 797 | 361.624         | 33               | 361.61481             | Fe I  | $3d^6(^5D)4s4p(^3P^o)$ | $3d^7(^4F)4d$          | [2]       |

| No. | Wavelength (nm) | Intensity (a.u.) | Wavelength (nm), Ref. | Type  | Lower energy level       | Higher energy level        | Reference |
|-----|-----------------|------------------|-----------------------|-------|--------------------------|----------------------------|-----------|
|     |                 |                  | 361.63197             | Fe I  | $3d^6 4s^2$              | $3d^6(^3F_2) 4s 4p(^3P^o)$ | [2]       |
| 798 | 361.872         | 38534            | 361.85968             | Fe I  | $3d^7(^2D_2) 4s$         | $3d^7(^4F) 5p$             | [2]       |
|     |                 |                  | 361.87677             | Fe I  | $3d^7(^4F) 4s$           | $3d^7(^4F) 4p$             | [2]       |
|     |                 |                  | 361.88123             | Fe I  | $3d^6 4s^2$              | $3d^6(^3G) 4s 4p(^3P^o)$   | [2]       |
| 799 | 363.439         | 146              | 363.43275             | Fe I  | $3d^6(^5D) 4s 4p(^3P^o)$ | $3d^6(^5D) 4s (^6D) 4d$    | [2]       |
|     |                 |                  | 363.43962             | Fe I  | $3d^7(^2H) 4s$           | $3d^7(^4F) 5p$             | [2]       |
|     |                 |                  | 363.4461              | Fe I  | $3d^7(^2D_2) 4s$         | $3d^6(^3D) 4s 4p(^3P^o)$   | [2]       |
| 800 | 363.615         | 55               | 363.6161              | Fe I  | $3d^7(^4P) 4s$           | $3d^6(^3P_2) 4s 4p(^3P^o)$ | [2]       |
|     |                 |                  | 363.6161              | Fe I  | $3d^6(^5D) 4s 4p(^3P^o)$ | $3d^7(^4F) 4d$             | [2]       |
|     |                 |                  | 363.62233             | Fe I  | $3d^7(^2D_2) 4s$         | $3d^6(^3G) 4s 4p(^3P^o)$   | [2]       |
| 801 | 363.698         | 137              | 363.69939             | Fe I  | $3d^6 4s^2$              | $3d^6(^3G) 4s 4p(^3P^o)$   | [2]       |
|     |                 |                  | 363.70455             | Fe I  | $3d^6 4s^2$              | $3d^7(^2H) 4p$             | [2]       |
| 802 | 363.827         | 337              | 363.81576             | Fe I  | $3d^6(^5D) 4s 4p(^3P^o)$ | $3d^6(^5D) 4s (^6D) 4d$    | [2]       |
|     |                 |                  | 363.82384             | Fe I  | $3d^7(^2G) 4s$           | $3d^6(^3F_2) 4s 4p(^3P^o)$ | [2]       |
|     |                 |                  | 363.82962             | Fe I  | $3d^7(^2G) 4s$           | $3d^7(^2G) 4p$             | [2]       |
| 803 | 364.781         | 60247            | 364.7843              | Fe I  | $3d^7(^4F) 4s$           | $3d^7(^4F) 4p$             | [2]       |
|     |                 |                  | 364.7843              | Fe I  | $3d^6(^5D) 4s 4p(^3P^o)$ | $3d^7(^4F) 4d$             | [2]       |
| 804 | 364.946         | 1051             | 364.93329             | Fe I  | $3d^7(^2G) 4s$           | $3d^7(^2P) 4p$             | [2]       |
|     |                 |                  | 364.95061             | Fe I  | $3d^7(^2G) 4s$           | $3d^7(^2G) 4p$             | [2]       |
| 805 | 365.546         | 108              | 365.53511             | Fe I  | $3d^6 4s^2$              | $3d^6(^3P_2) 4s 4p(^3P^o)$ | [2]       |
|     |                 |                  | 365.54647             | Fe I  | $3d^7(^4P) 4s$           | $3d^7(^2P) 4p$             | [2]       |
|     |                 |                  | 365.55703             | Fe II | $3d^5(^6S) 4s 4p(^1P^o)$ | $3d^5 4s(^7S) 5s$          | [1]       |
| 806 | 365.794         | 33               | 365.78982             | Fe I  | $3d^6(^5D) 4s 4p(^3P^o)$ | $3d^6(^5D) 4s (^6D) 4d$    | [2]       |
|     |                 |                  | 365.802               | Fe I  | $3d^6 4s^2$              | $3d^7(^2H) 4p$             | [2]       |
| 807 | 366.617         | 39               | 366.6241              | Fe I  | $3d^6 4s^2$              | $3d^6(^3F_2) 4s 4p(^3P^o)$ | [2]       |
|     |                 |                  | 366.6241              | Fe I  | $3d^6(^5D) 4s 4p(^3P^o)$ | $3d^6(^5D) 4s (^6D) 4d$    | [2]       |
| 808 | 366.794         | 53               | 366.7986              | Fe I  | $3d^6(^5D) 4s 4p(^3P^o)$ | $3d^7(^4F) 4d$             | [2]       |
|     |                 |                  | 366.7986              | Fe I  | $3d^6 4s^2$              | $3d^7(^2H) 4p$             | [2]       |
| 809 | 367.006         | 480              | 367.00241             | Fe I  | $3d^7(^4P) 4s$           | $3d^7(^2P) 4p$             | [2]       |
|     |                 |                  | 367.00881             | Fe I  | $3d^6 4s^2$              | $3d^6(^3G) 4s 4p(^3P^o)$   | [2]       |
| 810 | 367.759         | 687              | 367.74536             | Fe I  | $3d^6(^5D) 4s 4p(^3P^o)$ | $3d^6 4s(^4D) 4d$          | [2]       |
|     |                 |                  | 367.75035             | Fe I  | $3d^7(^2D_2) 4s$         | $3d^7(^2P) 4p$             | [2]       |
|     |                 |                  | 367.76274             | Fe I  | $3d^7(^2G) 4s$           | $3d^7(^2G) 4p$             | [2]       |
| 811 | 368.074         | 101              | 368.0657              | Fe I  | $3d^6(^5D) 4s 4p(^3P^o)$ | $3d^7(^4F) 4d$             | [2]       |
|     |                 |                  | 368.08094             | Fe I  | $3d^6(^5D) 4s 4p(^3P^o)$ | $3d^6 4s(^4D) 4d$          | [2]       |
| 812 | 368.227         | 1144             | 368.21673             | Fe I  | $3d^6(^5D) 4s 4p(^3P^o)$ | $3d^6(^5D) 4s (^6D) 4d$    | [2]       |



| No. | Wavelength (nm) | Intensity (a.u.) | Wavelength (nm), Ref. | Type  | Lower energy level     | Higher energy level     | Reference |
|-----|-----------------|------------------|-----------------------|-------|------------------------|-------------------------|-----------|
|     |                 |                  | 368.2244              | Fe I  | $3d^7(^2D2)4s$         | $3d^7(^2D2)4p$          | [2]       |
| 813 | 368.309         | 459              | 368.305445            | Fe II | $3d^6(^1D2)4p$         | $3d^6(^5D)5d$           | [1]       |
|     |                 |                  | 368.30545             | Fe I  | $3d^64s^2$             | $3d^6(^5D)4s4p(^3P^o)$  | [2]       |
| 814 | 368.415         | 441              | 368.41074             | Fe I  | $3d^7(^2G)4s$          | $3d^6(^3F2)4s4p(^3P^o)$ | [2]       |
|     |                 |                  | 368.41374             | Fe I  | $3d^7(^2H)4s$          | $3d^7(^2D2)4p$          | [2]       |
| 815 | 368.946         | 494              | 368.93687             | Fe I  | $3d^6(^5D)4s4p(^3P^o)$ | $3d^6(^5D)4s(^6D)4d$    | [2]       |
|     |                 |                  | 368.94579             | Fe I  | $3d^6(^5D)4s4p(^3P^o)$ | $3d^6(^5D)4s(^6D)4d$    | [2]       |
| 816 | 369.511         | 255              | 369.5051              | Fe I  | $3d^7(^2G)4s$          | $3d^6(^3H)4s4p(^3P^o)$  | [2]       |
|     |                 |                  | 369.5051              | Fe I  | $3d^64s^2$             | $3d^6(^3G)4s4p(^3P^o)$  | [2]       |
| 817 | 369.747         | 158              | 369.74252             | Fe I  | $3d^6(^5D)4s4p(^3P^o)$ | $3d^6(^5D)4s(^6D)4d$    | [2]       |
|     |                 |                  | 369.75357             | Fe I  | $3d^7(^2D2)4s$         | $3d^7(^4F)5p$           | [2]       |
| 818 | 370.359         | 174              | 370.35476             | Fe I  | $3d^7(^2G)4s$          | $3d^7(^2G)4p$           | [2]       |
|     |                 |                  | 370.3584              | Fe I  | $3d^7(^2G)4s$          | $3d^6(^3F2)4s4p(^3P^o)$ | [2]       |
|     |                 |                  | 370.36906             | Fe I  | $3d^6(^5D)4s4p(^3P^o)$ | $3d^6(^5D)4s(^6D)4d$    | [2]       |
| 819 | 370.442         | 252              | 370.43496             | Fe I  | $3d^7(^2H)4s$          | $3d^7(^2H)4p$           | [2]       |
|     |                 |                  | 370.4461              | Fe I  | $3d^7(^2G)4s$          | $3d^6(^3H)4s4p(^3P^o)$  | [2]       |
| 820 | 370.56          | 53787            | 370.55658             | Fe I  | $3d^64s^2$             | $3d^6(^5D)4s4p(^3P^o)$  | [2]       |
|     |                 |                  | 370.56976             | Fe I  | $3d^7(^2H)4s$          | $3d^7(^4F)5p$           | [2]       |
| 821 | 370.795         | 2346             | 370.78218             | Fe I  | $3d^64s^2$             | $3d^6(^5D)4s4p(^3P^o)$  | [2]       |
|     |                 |                  | 370.79196             | Fe I  | $3d^7(^4P)4s$          | $3d^7(^4P)4p$           | [2]       |
| 822 | 370.96          | 3042             | 370.95335             | Fe I  | $3d^64s^2$             | $3d^6(^3G)4s4p(^3P^o)$  | [2]       |
|     |                 |                  | 370.96651             | Fe I  | $3d^64s^2$             | $3d^6(^3G)4s4p(^3P^o)$  | [2]       |
| 823 | 372.149         | 269              | 372.13932             | Fe I  | $3d^64s^2$             | $3d^6(^3P2)4s4p(^3P^o)$ | [2]       |
|     |                 |                  | 372.15025             | Fe I  | $3d^6(^5D)4s4p(^3P^o)$ | $3d^6(^5D)4s(^6D)4d$    | [2]       |
|     |                 |                  | 372.16002             | Fe I  | $3d^64s^2$             | $3d^7(^2D2)4p$          | [2]       |
| 824 | 372.761         | 9061             | 372.75267             | Fe I  | $3d^6(^5D)4s4p(^3P^o)$ | $3d^7(^4F)4d$           | [2]       |
|     |                 |                  | 372.76188             | Fe I  | $3d^7(^4F)4s$          | $3d^7(^4F)4p$           | [2]       |
|     |                 |                  | 372.76735             | Fe I  | $3d^64s^2$             | $3d^6(^3G)4s4p(^3P^o)$  | [2]       |
| 825 | 373.043         | 206              | 373.03861             | Fe I  | $3d^7(^2G)4s$          | $3d^7(^2H)4p$           | [2]       |
|     |                 |                  | 373.04602             | Fe I  | $3d^6(^5D)4s4p(^3P^o)$ | $3d^6(^5D)4s(^6D)4d$    | [2]       |
| 826 | 374.02          | 306              | 374.00588             | Fe I  | $3d^7(^2G)4s$          | $3d^7(^2D2)4p$          | [2]       |
|     |                 |                  | 374.02392             | Fe I  | $3d^7(^2D2)4s$         | $3d^6(^3G)4s4p(^3P^o)$  | [2]       |
| 827 | 374.267         | 237              | 374.25558             | Fe I  | $3d^6(^5D)4s4p(^3P^o)$ | $3d^6(^5D)4s(^6D)4d$    | [2]       |
|     |                 |                  | 374.26163             | Fe I  | $3d^6(^5D)4s4p(^3P^o)$ | $3d^6(^5D)4s(^6D)4d$    | [2]       |
| 828 | 374.337         | 6132             | 374.33619             | Fe I  | $3d^7(^4F)4s$          | $3d^7(^4F)4p$           | [2]       |
|     |                 |                  | 374.3468              | Fe I  | $3d^7(^2H)4s$          | $3d^6(^1G2)4s4p(^3P^o)$ | [2]       |

| No. | Wavelength (nm) | Intensity (a.u.) | Wavelength (nm), Ref. | Type  | Lower energy level     | Higher energy level     | Reference |
|-----|-----------------|------------------|-----------------------|-------|------------------------|-------------------------|-----------|
| 829 | 374.408         | 173              | 374.4102              | Fe I  | $3d^7(^2H)4s$          | $3d^7(^4F)5p$           | [2]       |
|     |                 |                  | 374.4102              | Fe I  | $3d^6(^5D)4s4p(^3P^o)$ | $3d^6(^5D)4s(^6D)4d$    | [2]       |
| 830 | 374.561         | 65527            | 374.54711             | Fe I  | $3d^7(^2D2)4s$         | $3d^7(^2D2)4p$          | [2]       |
|     |                 |                  | 374.5561              | Fe I  | $3d^64s^2$             | $3d^6(^5D)4s4p(^3P^o)$  | [2]       |
| 831 | 374.69          | 293              | 374.69267             | Fe I  | $3d^6(^5D)4s4p(^3P^o)$ | $3d^6(^5D)4s(^6D)4d$    | [2]       |
|     |                 |                  | 374.6996              | Fe I  | $3d^6(^5D)4s4p(^3P^o)$ | $3d^6(^5D)4s(^6D)4d$    | [2]       |
| 832 | 376.559         | 2665             | 376.55387             | Fe I  | $3d^7(^2H)4s$          | $3d^7(^2H)4p$           | [2]       |
|     |                 |                  | 376.56997             | Fe II | $3d^6(^1D2)4p$         | $3d^6(^3P2)4d$          | [1]       |
|     |                 |                  | 376.57                | Fe I  | $3d^7(^2H)4s$          | $3d^7(^2H)4p$           | [2]       |
| 833 | 377.029         | 169              | 377.03012             | Fe I  | $3d^7(^2G)4s$          | $3d^6(^3G)4s4p(^3P^o)$  | [2]       |
|     |                 |                  | 377.04043             | Fe I  | $3d^64s^2$             | $3d^6(^3H)4s4p(^3P^o)$  | [2]       |
| 834 | 377.945         | 50               | 377.94157             | Fe I  | $3d^64s^2$             | $3d^6(^3F2)4s4p(^3P^o)$ | [2]       |
|     |                 |                  | 377.94535             | Fe I  | $3d^7(^2D2)4s$         | $3d^7(^2D2)4p$          | [2]       |
|     |                 |                  | 377.95079             | Fe I  | $3d^7(^4P)4s$          | $3d^6(^3F2)4s4p(^3P^o)$ | [2]       |
| 835 | 378.591         | 1311             | 378.57862             | Fe I  | $3d^6(^5D)4s4p(^3P^o)$ | $3d^7(^4F)4d$           | [2]       |
|     |                 |                  | 378.59481             | Fe I  | $3d^64s^2$             | $3d^6(^3H)4s4p(^3P^o)$  | [2]       |
| 836 | 379.014         | 2222             | 379.00927             | Fe I  | $3d^7(^4F)4s$          | $3d^6(^5D)4s4p(^3P^o)$  | [2]       |
|     |                 |                  | 379.02384             | Fe I  | $3d^64s^2$             | $3d^7(^4P)4p$           | [2]       |
| 837 | 379.343         | 99               | 379.33531             | Fe I  | $3d^6(^5D)4s4p(^3P^o)$ | $3d^6(^5D)4s(^6D)4d$    | [2]       |
|     |                 |                  | 379.34804             | Fe I  | $3d^6(^5D)4s4p(^3P^o)$ | $3d^6(^5D)4s(^6D)4d$    | [2]       |
| 838 | 380.176         | 106              | 380.16791             | Fe I  | $3d^7(^4P)4s$          | $3d^6(^3F2)4s4p(^3P^o)$ | [2]       |
|     |                 |                  | 380.18084             | Fe I  | $3d^7(^4P)4s$          | $3d^6(^3F2)4s4p(^3P^o)$ | [2]       |
| 839 | 380.54          | 1048             | 380.5342              | Fe I  | $3d^6(^5D)4s4p(^3P^o)$ | $3d^7(^4F)4d$           | [2]       |
|     |                 |                  | 380.5342              | Fe I  | $3d^7(^2H)4s$          | $3d^7(^2H)4p$           | [2]       |
| 840 | 380.669         | 732              | 380.66954             | Fe I  | $3d^7(^2H)4s$          | $3d^7(^2H)4p$           | [2]       |
|     |                 |                  | 380.67601             | Fe I  | $3d^64s^2$             | $3d^7(^4P)4p$           | [2]       |
| 841 | 380.868         | 106              | 380.87283             | Fe I  | $3d^64s^2$             | $3d^6(^3F2)4s4p(^3P^o)$ | [2]       |
|     |                 |                  | 380.87925             | Fe II | $3d^54s^2$             | $3d^5(^4F)4s4p(^3P^o)$  | [1]       |
| 842 | 381.185         | 143              | 381.18042             | Fe I  | $3d^6(^5D)4s4p(^3P^o)$ | $3d^7(^4F)4d$           | [2]       |
|     |                 |                  | 381.18907             | Fe I  | $3d^7(^2G)4s$          | $3d^6(^3G)4s4p(^3P^o)$  | [2]       |
| 843 | 381.302         | 9515             | 381.29643             | Fe I  | $3d^7(^4F)4s$          | $3d^6(^5D)4s4p(^3P^o)$  | [2]       |
|     |                 |                  | 381.30578             | Fe I  | $3d^64s^2$             | $3d^6(^3F2)4s4p(^3P^o)$ | [2]       |
| 844 | 381.361         | 55               | 381.36346             | Fe II | $3d^5(^6S)4s4p(^1P^o)$ | $3d^6(^3F2)4d$          | [1]       |
|     |                 |                  | 381.36347             | Fe I  | $3d^7(^2G)4s$          | $3d^6(^3G)4s4p(^3P^o)$  | [2]       |
| 845 | 381.385         | 47               | 381.38842             | Fe I  | $3d^64s^2$             | $3d^6(^1G2)4s4p(^3P^o)$ | [2]       |
|     |                 |                  | 381.39331             | Fe I  | $3d^64s^2$             | $3d^6(^3F2)4s4p(^3P^o)$ | [2]       |

| No. | Wavelength (nm) | Intensity (a.u.) | Wavelength (nm), Ref. | Type  | Lower energy level     | Higher energy level     | Reference |
|-----|-----------------|------------------|-----------------------|-------|------------------------|-------------------------|-----------|
| 846 | 381.76          | 90               | 381.7451              | Fe I  | $3d^6(^5D)4s4p(^3P^o)$ | $3d^7(^4F)6s$           | [2]       |
|     |                 |                  | 381.76392             | Fe I  | $3d^6(^5D)4s4p(^3P^o)$ | $3d^7(^4F)4d$           | [2]       |
| 847 | 382.44          | 65527            | 382.43035             | Fe I  | $3d^7(^2H)4s$          | $3d^7(^2H)4p$           | [2]       |
|     |                 |                  | 382.44435             | Fe I  | $3d^64s^2$             | $3d^6(^5D)4s4p(^3P^o)$  | [2]       |
| 848 | 383.085         | 81               | 383.07572             | Fe I  | $3d^64s^2$             | $3d^7(^4P)4p$           | [2]       |
|     |                 |                  | 383.08617             | Fe I  | $3d^7(^2G)4s$          | $3d^6(^3F2)4s4p(^3P^o)$ | [2]       |
| 849 | 383.706         | 34               | 383.69151             | Fe I  | $3d^7(^2G)4s$          | $3d^7(^4P)4p$           | [2]       |
|     |                 |                  | 383.71347             | Fe I  | $3d^64s^2$             | $3d^6(^3F2)4s4p(^3P^o)$ | [2]       |
| 850 | 384.515         | 84               | 384.51686             | Fe I  | $3d^64s^2$             | $3d^6(^3P2)4s4p(^3P^o)$ | [2]       |
|     |                 |                  | 384.5215              | Fe I  | $3d^6(^5D)4s4p(^3P^o)$ | $3d^7(^4F)4d$           | [2]       |
| 851 | 384.679         | 604              | 384.68                | Fe I  | $3d^6(^5D)4s4p(^3P^o)$ | $3d^7(^4F)4d$           | [2]       |
|     |                 |                  | 384.68                | Fe I  | $3d^7(^2D2)4s$         | $3d^7(^2D2)4p$          | [2]       |
|     |                 |                  | 384.69333             | Fe I  | $3d^64s^2$             | $3d^6(^3F2)4s4p(^3P^o)$ | [2]       |
| 852 | 386.131         | 114              | 386.13398             | Fe II | $3d^6(^5D)5p$          | $3d^6(^5D)6d$           | [1]       |
|     |                 |                  | 386.134               | Fe I  | $3d^7(^2G)4s$          | $3d^6(^3G)4s4p(^3P^o)$  | [2]       |
| 853 | 386.366         | 78               | 386.36903             | Fe I  | $3d^6(^5D)4s4p(^3P^o)$ | $3d^6(^5D)4s(^4D)5s$    | [2]       |
|     |                 |                  | 386.37411             | Fe I  | $3d^7(^2G)4s$          | $3d^6(^3G)4s4p(^3P^o)$  | [2]       |
| 854 | 386.951         | 164              | 386.9558              | Fe I  | $3d^7(^2G)4s$          | $3d^6(^3F2)4s4p(^3P^o)$ | [2]       |
|     |                 |                  | 386.96078             | Fe I  | $3d^7(^2G)4s$          | $3d^6(^3F2)4s4p(^3P^o)$ | [2]       |
| 855 | 388.847         | 4379             | 388.8416              | Fe I  | $3d^6(^5D)4s4p(^3P^o)$ | $3d^6(^5D)4s(^4D)5s$    | [2]       |
|     |                 |                  | 388.85132             | Fe I  | $3d^7(^4F)4s$          | $3d^7(^4F)4p$           | [2]       |
| 856 | 389.338         | 239              | 389.33091             | Fe I  | $3d^7(^4P)4s$          | $3d^7(^4P)4p$           | [2]       |
|     |                 |                  | 389.33901             | Fe I  | $3d^64s^2$             | $3d^7(^2G)4p$           | [2]       |
| 857 | 390.649         | 3876             | 390.64795             | Fe I  | $3d^64s^2$             | $3d^6(^5D)4s4p(^3P^o)$  | [2]       |
|     |                 |                  | 390.6532              | Fe I  | $3d^7(^2G)4s$          | $3d^6(^3G)4s4p(^3P^o)$  | [2]       |
| 858 | 391.096         | 102              | 391.08434             | Fe I  | $3d^7(^2G)4s$          | $3d^6(^3F2)4s4p(^3P^o)$ | [2]       |
|     |                 |                  | 391.09988             | Fe I  | $3d^6(^5D)4s4p(^3P^o)$ | $3d^6(^5D)4s(^6D)4d$    | [2]       |
| 859 | 391.836         | 187              | 391.83149             | Fe II | $3d^6(^1G2)4p$         | $3d^6(^3H)5s$           | [1]       |
|     |                 |                  | 391.8315              | Fe I  | $3d^64s^2$             | $3d^6(^3P2)4s4p(^3P^o)$ | [2]       |
|     |                 |                  | 391.84152             | Fe I  | $3d^7(^4P)4s$          | $3d^7(^4P)4p$           | [2]       |
| 860 | 392.6           | 193              | 392.5941              | Fe I  | $3d^7(^4P)4s$          | $3d^7(^4P)4p$           | [2]       |
|     |                 |                  | 392.60129             | Fe I  | $3d^6(^5D)4s4p(^3P^o)$ | $3d^6(^5D)4s(^6D)4d$    | [2]       |
| 861 | 392.799         | 38773            | 392.792               | Fe I  | $3d^64s^2$             | $3d^6(^5D)4s4p(^3P^o)$  | [2]       |
|     |                 |                  | 392.792               | Fe I  | $3d^7(^4P)4s$          | $3d^6(^5S)4s^24p$       | [2]       |
|     |                 |                  | 392.80827             | Fe I  | $3d^6(^5D)4s4p(^3P^o)$ | $3d^6(^5D)4s(^4D)5s$    | [2]       |
| 862 | 393.363         | 72               | 393.3599              | Fe I  | $3d^7(^4F)4p$          | $3d^64s(^4D)4d$         | [2]       |

| No. | Wavelength (nm) | Intensity (a.u.) | Wavelength (nm), Ref. | Type  | Lower energy level     | Higher energy level     | Reference |
|-----|-----------------|------------------|-----------------------|-------|------------------------|-------------------------|-----------|
|     |                 |                  | 393.3599              | Fe I  | $3d^7(^2P)4s$          | $3d^7(^2P)4p$           | [2]       |
|     |                 |                  | 393.3599              | Fe I  | $3d^6(^5D)4s4p(^3P^o)$ | $3d^6(^5D)4s(^6D)4d$    | [2]       |
| 863 | 393.586         | 159              | 393.58122             | Fe I  | $3d^7(^4P)4s$          | $3d^6(^3G)4s4p(^3P^o)$  | [2]       |
|     |                 |                  | 393.58602             | Fe I  | $3d^6(^5D)4s4p(^3P^o)$ | $3d^6(^5D)4s(^4D)5s$    | [2]       |
|     |                 |                  | 393.5942              | Fe II | $3d^6(^1F)4s$          | $3d^6(^3G)4p$           | [5]       |
| 864 | 394.125         | 65               | 394.1183              | Fe I  | $3d^6(^5D)4s4p(^3P^o)$ | $3d^64s(^6D)5d$         | [2]       |
|     |                 |                  | 394.1275              | Fe I  | $3d^6(^5D)4s4p(^3P^o)$ | $3d^6(^5D)4s(^6D)4d$    | [2]       |
| 865 | 394.243         | 148              | 394.23638             | Fe I  | $3d^64s^2$             | $3d^6(^3F2)4s4p(^3P^o)$ | [2]       |
|     |                 |                  | 394.24397             | Fe I  | $3d^7(^4P)4s$          | $3d^7(^4P)4p$           | [2]       |
| 866 | 394.818         | 213              | 394.8097              | Fe I  | $3d^6(^5D)4s4p(^3P^o)$ | $3d^6(^5D)4s(^6D)4d$    | [2]       |
|     |                 |                  | 394.8276              | Fe I  | $3d^6(^5D)4s4p(^3P^o)$ | $3d^6(^5D)4s(^6D)4d$    | [2]       |
| 867 | 395.263         | 237              | 395.2601              | Fe I  | $3d^7(^2G)4s$          | $3d^6(^3H)4s4p(^3P^o)$  | [2]       |
|     |                 |                  | 395.26955             | Fe I  | $3d^7(^4P)4s$          | $3d^6(^3G)4s4p(^3P^o)$  | [2]       |
| 868 | 397.034         | 49               | 397.02605             | Fe I  | $3d^7(^2D2)4s$         | $3d^7(^4F)5p$           | [2]       |
|     |                 |                  | 397.03888             | Fe I  | $3d^7(^2P)4s$          | $3d^7(^2P)4p$           | [2]       |
| 869 | 397.643         | 61               | 397.6385              | Fe I  | $3d^7(^2P)4s$          | $3d^6(^3F2)4s4p(^3P^o)$ | [2]       |
|     |                 |                  | 397.6546              | Fe I  | $3d^7(^2D2)4s$         | $3d^7(^2D2)4p$          | [2]       |
| 870 | 397.666         | 70               | 397.6546              | Fe I  | $3d^7(^2D2)4s$         | $3d^7(^2D2)4p$          | [2]       |
|     |                 |                  | 397.6613              | Fe I  | $3d^7(^2P)4s$          | $3d^7(^2D2)4p$          | [2]       |
| 871 | 397.69          | 45               | 397.6861              | Fe I  | $3d^64s^2$             | $3d^6(^3F2)4s4p(^3P^o)$ | [2]       |
|     |                 |                  | 397.6861              | Fe I  | $3d^7(^2D2)4s$         | $3d^6(^3H)4s4p(^3P^o)$  | [2]       |
| 872 | 398.545         | 38               | 398.53157             | Fe I  | $3d^64s^2$             | $3d^6(^3F2)4s4p(^3P^o)$ | [2]       |
|     |                 |                  | 398.5387              | Fe I  | $3d^7(^2D2)4s$         | $3d^7(^2P)4p$           | [2]       |
| 873 | 398.615         | 79               | 398.6067              | Fe II | $3d^5(^6S)4s4p(^1P^o)$ | $3d^6(^5D)5d$           | [1]       |
|     |                 |                  | 398.61714             | Fe I  | $3d^7(^2D2)4s$         | $3d^7(^2D2)4p$          | [2]       |
| 874 | 399.599         | 41               | 399.5861              | Fe I  | $3d^6(^5D)4s4p(^3P^o)$ | $3d^64s(^4D)4d$         | [2]       |
|     |                 |                  | 399.59833             | Fe I  | $3d^7(^2G)4s$          | $3d^7(^4P)4p$           | [2]       |
| 875 | 399.739         | 1567             | 399.73919             | Fe I  | $3d^7(^2G)4s$          | $3d^6(^3H)4s4p(^3P^o)$  | [2]       |
|     |                 |                  | 399.74835             | Fe I  | $3d^6(^5D)4s4p(^3P^o)$ | $3d^6(^5D)4s(^6D)4d$    | [2]       |
| 876 | 400.605         | 56               | 400.61574             | Fe I  | $3d^6(^5D)4s4p(^3P^o)$ | $3d^6(^5D)4s(^4D)5s$    | [2]       |
| 877 | 400.628         | 55               | 400.61574             | Fe I  | $3d^6(^5D)4s4p(^3P^o)$ | $3d^6(^5D)4s(^4D)5s$    | [2]       |
|     |                 |                  | 400.63105             | Fe I  | $3d^7(^2H)4s$          | $3d^7(^2D2)4p$          | [2]       |
|     |                 |                  | 400.6392              | Fe II | $3d^54s^2$             | $3d^5(^2D3)4s4p(^3P^o)$ | [1]       |
| 878 | 400.968         | 272              | 400.9542              | Fe I  | $3d^6(^5D)4s4p(^3P^o)$ | $3d^6(^5D)4s(^6D)4d$    | [2]       |
|     |                 |                  | 400.97125             | Fe I  | $3d^7(^4P)4s$          | $3d^6(^3P2)4s4p(^3P^o)$ | [2]       |
| 879 | 401.377         | 38               | 401.36392             | Fe I  | $3d^6(^5D)4s4p(^3P^o)$ | $3d^6(^5D)4s(^6D)4d$    | [2]       |

| No. | Wavelength (nm) | Intensity (a.u.) | Wavelength (nm), Ref. | Type  | Lower energy level     | Higher energy level     | Reference |
|-----|-----------------|------------------|-----------------------|-------|------------------------|-------------------------|-----------|
|     |                 |                  | 401.37815             | Fe I  | $3d^7(^2P)4s$          | $3d^7(^2G)4p$           | [2]       |
|     |                 |                  | 401.38246             | Fe I  | $3d^7(^2P)4s$          | $3d^6(^3F2)4s4p(^3P^o)$ | [2]       |
| 880 | 401.716         | 77               | 401.70832             | Fe I  | $3d^7(^2G)4s$          | $3d^7(^4P)4p$           | [2]       |
|     |                 |                  | 401.71483             | Fe I  | $3d^7(^2G)4s$          | $3d^7(^2G)4p$           | [2]       |
| 881 | 403.049         | 629              | 403.03559             | Fe II | $3d^6(^5D)5p$          | $3d^6(^5D)6d$           | [1]       |
|     |                 |                  | 403.04883             | Fe I  | $3d^6(^5D)4s4p(^3P^o)$ | $3d^6(^5D)4s(^6D)4d$    | [2]       |
| 882 | 404.136         | 154              | 404.1271              | Fe I  | $3d^7(^2H)4s$          | $3d^7(^2D2)4p$          | [2]       |
|     |                 |                  | 404.1271              | Fe I  | $3d^7(^2D2)4s$         | $3d^6(^5D)4s(^6D)5p$    | [2]       |
| 883 | 404.393         | 86               | 404.38964             | Fe I  | $3d^6(^5D)4s4p(^3P^o)$ | $3d^6(^5D)4s(^6D)4d$    | [2]       |
|     |                 |                  | 404.39767             | Fe I  | $3d^6(^5D)4s4p(^3P^o)$ | $3d^6(^5D)4s(^6D)4d$    | [2]       |
| 884 | 404.463         | 154              | 404.44906             | Fe I  | $3d^7(^4F)4p$          | $3d^6(^5D)4s(^4D)4d$    | [2]       |
|     |                 |                  | 404.45444             | Fe I  | $3d^7(^2H)4s$          | $3d^6(^3G)4s4p(^3P^o)$  | [2]       |
|     |                 |                  | 404.46089             | Fe I  | $3d^7(^4P)4s$          | $3d^7(^4P)4p$           | [2]       |
| 885 | 406.354         | 58345            | 406.34166             | Fe I  | $3d^6(^5D)4s4p(^3P^o)$ | $3d^64s(^4D)4d$         | [2]       |
|     |                 |                  | 406.35939             | Fe I  | $3d^7(^4F)4s$          | $3d^7(^4F)4p$           | [2]       |
| 886 | 407.591         | 34               | 407.5812              | Fe II | $3d^6(^5D)4d$          | $3d^6(^5D)6p$           | [1]       |
|     |                 |                  | 407.59428             | Fe II | $3d^7$                 | $3d^6(^5D)4p$           | [1]       |
| 887 | 407.661         | 436              | 407.64895             | Fe I  | $3d^64s^2$             | $3d^6(^3H)4s4p(^3P^o)$  | [2]       |
|     |                 |                  | 407.66288             | Fe I  | $3d^6(^5D)4s4p(^3P^o)$ | $3d^6(^5D)4s(^6D)4d$    | [2]       |
| 888 | 408.524         | 139              | 408.5248              | Fe I  | $3d^7(^2G)4s$          | $3d^7(^4P)4p$           | [2]       |
|     |                 |                  | 408.53028             | Fe I  | $3d^6(^5D)4s4p(^3P^o)$ | $3d^6(^5D)4s(^6D)4d$    | [2]       |
| 889 | 409.596         | 67               | 409.59705             | Fe I  | $3d^64s^2$             | $3d^6(^3P2)4s4p(^3P^o)$ | [2]       |
|     |                 |                  | 409.61069             | Fe I  | $3d^64s^2$             | $3d^7(^2D2)4p$          | [2]       |
| 890 | 409.619         | 33               | 409.61069             | Fe I  | $3d^64s^2$             | $3d^7(^2D2)4p$          | [2]       |
|     |                 |                  | 409.621               | Fe I  | $3d^7(^4F)4s$          | $3d^6(^5D)4s4p(^3P^o)$  | [2]       |
| 891 | 410.411         | 47               | 410.41133             | Fe I  | $3d^6(^5D)4s4p(^3P^o)$ | $3d^6(^5D)4s(^6D)4d$    | [2]       |
|     |                 |                  | 410.41536             | Fe I  | $3d^7(^4P)4s$          | $3d^6(^3F2)4s4p(^3P^o)$ | [2]       |
| 892 | 411.294         | 91               | 411.2912              | Fe I  | $3d^7(^4F)4p$          | $3d^6(^5D)4s(^4D)4d$    | [2]       |
|     |                 |                  | 411.29586             | Fe I  | $3d^7(^4F)4p$          | $3d^6(^5D)4s(^4D)4d$    | [2]       |
| 893 | 411.446         | 72               | 411.44447             | Fe I  | $3d^7(^4P)4s$          | $3d^7(^4P)4p$           | [2]       |
|     |                 |                  | 411.4539              | Fe II | $3d^6(^3H)4p$          | $3d^6(^5D)4d$           | [1]       |
| 894 | 412.252         | 55               | 412.25152             | Fe I  | $3d^7(^4P)4s$          | $3d^6(^3F2)4s4p(^3P^o)$ | [2]       |
|     |                 |                  | 412.2638              | Fe II | $3d^6(^3P2)4s$         | $3d^6(^5D)4p$           | [5]       |
| 895 | 412.369         | 54               | 412.3728              | Fe I  | $3d^64s^2$             | $3d^6(^3G)4s4p(^3P^o)$  | [2]       |
|     |                 |                  | 412.37658             | Fe I  | $3d^64s^2$             | $3d^6(^3P2)4s4p(^3P^o)$ | [2]       |
| 896 | 413.198         | 4446             | 413.19351             | Fe I  | $3d^6(^5D)4s4p(^3P^o)$ | $3d^6(^5D)4s(^6D)4d$    | [2]       |

| No. | Wavelength (nm) | Intensity (a.u.) | Wavelength (nm), Ref. | Type  | Lower energy level     | Higher energy level      | Reference |
|-----|-----------------|------------------|-----------------------|-------|------------------------|--------------------------|-----------|
|     |                 |                  | 413.1972              | Fe I  | $3d^6(^5D)4s4p(^3P^o)$ | $3d^6(^5D)4s(^6D)4d$     | [2]       |
|     |                 |                  | 413.20579             | Fe I  | $3d^7(^4F)4s$          | $3d^7(^4F)4p$            | [2]       |
| 897 | 414.273         | 38               | 414.25886             | Fe II | $3d^6(^5D)4d$          | $3d^5(^2F_1)4s4p(^3P^o)$ | [1]       |
|     |                 |                  | 414.2589              | Fe I  | $3d^7(^4F)4p$          | $3d^6(^5D)4s(^4D)4d$     | [2]       |
| 898 | 414.343         | 1854             | 414.34143             | Fe I  | $3d^7(^2G)4s$          | $3d^6(^3H)4s4p(^3P^o)$   | [2]       |
|     |                 |                  | 414.34969             | Fe I  | $3d^6(^5D)4s4p(^3P^o)$ | $3d^6(^5D)4s(^4D)5s$     | [2]       |
| 899 | 415.02          | 47               | 415.02486             | Fe II | $3d^6(^3P_1)4s$        | $3d^6(^3D)4p$            | [1]       |
|     |                 |                  | 415.02488             | Fe I  | $3d^6(^5D)4s4p(^3P^o)$ | $3d^6(^5D)4s(^6D)4d$     | [2]       |
| 900 | 415.673         | 353              | 415.66711             | Fe I  | $3d^64s^2$             | $3d^6(^3F_2)4s4p(^3P^o)$ | [2]       |
|     |                 |                  | 415.67985             | Fe I  | $3d^7(^4P)4s$          | $3d^7(^4P)4p$            | [2]       |
| 901 | 415.872         | 156              | 415.8735              | Fe II | $3d^6(^5D)4d$          | $3d^6(^5D)6p$            | [1]       |
|     |                 |                  | 415.87922             | Fe I  | $3d^6(^5D)4s4p(^3P^o)$ | $3d^6(^5D)4s(^6D)4d$     | [2]       |
| 902 | 416.793         | 28               | 416.78584             | Fe I  | $3d^7(^2H)4s$          | $3d^6(^3F_2)4s4p(^3P^o)$ | [2]       |
|     |                 |                  | 416.79549             | Fe I  | $3d^64s^2$             | $3d^7(^4F)5p$            | [2]       |
| 903 | 417.096         | 120              | 417.09015             | Fe I  | $3d^7(^2P)4s$          | $3d^7(^4P)4p$            | [2]       |
|     |                 |                  | 417.10404             | Fe I  | $3d^7(^4F)4p$          | $3d^7(^4F)5d$            | [2]       |
| 904 | 417.201         | 103              | 417.1899              | Fe I  | $3d^7(^2D_2)4s$        | $3d^7(^2G)4p$            | [2]       |
|     |                 |                  | 417.20391             | Fe I  |                        |                          | [2]       |
|     |                 |                  | 417.21219             | Fe I  | $3d^7(^2D_2)4s$        | $3d^7(^2P)4p$            | [2]       |
| 905 | 417.271         | 335              | 417.2573              | Fe I  | $3d^7(^2H)4s$          | $3d^7(^2G)4p$            | [2]       |
|     |                 |                  | 417.26405             | Fe I  | $3d^6(^5D)4s4p(^3P^o)$ | $3d^6(^5D)4s(^6D)4d$     | [2]       |
|     |                 |                  | 417.27445             | Fe I  | $3d^7(^4F)4s$          | $3d^6(^5D)4s4p(^3P^o)$   | [2]       |
|     |                 |                  | 417.2856              | Fe II | $3d^6(^5D)5p$          | $3d^6(^5D)6d$            | [1]       |
| 906 | 417.33          | 34               | 417.3181              | Fe I  | $3d^6(^5D)4s4p(^3P^o)$ | $3d^6(^5D)4s(^4D)5s$     | [2]       |
|     |                 |                  | 417.33147             | Fe II | $3d^6(^5D)5p$          | $3d^6(^5D)6d$            | [1]       |
|     |                 |                  | 417.33148             | Fe I  | $3d^7(^4P)4s$          | $3d^6(^3P_2)4s4p(^3P^o)$ | [2]       |
| 907 | 418.169         | 1445             | 418.15497             | Fe I  | $3d^7(^2D_2)4s$        | $3d^7(^2P)4p$            | [2]       |
|     |                 |                  | 418.17544             | Fe I  | $3d^7(^4P)4s$          | $3d^7(^4P)4p$            | [2]       |
| 908 | 418.239         | 65               | 418.2269              | Fe II | $3d^6(^5D)5p$          | $3d^6(^5D)6d$            | [1]       |
|     |                 |                  | 418.23823             | Fe I  | $3d^7(^2P)4s$          | $3d^6(^3G)4s4p(^3P^o)$   | [2]       |
| 909 | 418.484         | 242              | 418.4815              | Fe II | $3d^6(^3F_1)4p$        | $3d^6(^5D)6d$            | [1]       |
|     |                 |                  | 418.48915             | Fe I  | $3d^7(^4P)4s$          | $3d^6(^3P_2)4s4p(^3P^o)$ | [2]       |
| 910 | 419.824         | 2169             | 419.82466             | Fe I  | $3d^6(^5D)4s4p(^3P^o)$ | $3d^6(^5D)4s(^6D)4d$     | [2]       |
|     |                 |                  | 419.83041             | Fe I  | $3d^6(^5D)4s4p(^3P^o)$ | $3d^6(^5D)4s(^6D)5s$     | [2]       |
|     |                 |                  | 419.8355              | Fe II | $3d^6(^5D)5p$          | $3d^6(^5D)6d$            | [1]       |
| 911 | 420.091         | 55               | 420.0779              | Fe I  | $3d^7(^4F)4s$          | $3d^6(^5D)4s4p(^1P^o)$   | [2]       |

| No. | Wavelength (nm) | Intensity (a.u.) | Wavelength (nm), Ref. | Type  | Lower energy level     | Higher energy level     | Reference |
|-----|-----------------|------------------|-----------------------|-------|------------------------|-------------------------|-----------|
|     |                 |                  | 420.09239             | Fe I  | $3d^6(^5D)4s4p(^3P^o)$ | $3d^6(^5D)4s(^6D)4d$    | [2]       |
| 912 | 420.394         | 218              | 420.3938              | Fe I  | $3d^64s^2$             | $3d^7(^2H)4p$           | [2]       |
|     |                 |                  | 420.39845             | Fe I  | $3d^7(^4P)4s$          | $3d^6(^3P2)4s4p(^3P^o)$ | [2]       |
| 913 | 421.035         | 488              | 421.02324             | Fe II | $3d^6(^5D)5p$          | $3d^6(^5D)6d$           | [1]       |
|     |                 |                  | 421.03433             | Fe I  | $3d^6(^5D)4s4p(^3P^o)$ | $3d^6(^5D)4s(^6D)5s$    | [2]       |
|     |                 |                  | 421.0383              | Fe I  | $3d^7(^2P)4s$          | $3d^7(^4P)4p$           | [2]       |
| 914 | 421.547         | 65               | 421.5423              | Fe I  | $3d^64s^2$             | $3d^6(^3F2)4s4p(^3P^o)$ | [2]       |
|     |                 |                  | 421.5477              | Fe I  | $3d^64s^2$             | $3d^6(^3F2)4s4p(^3P^o)$ | [2]       |
| 915 | 421.931         | 668              | 421.93601             | Fe I  | $3d^7(^2H)4s$          | $3d^7(^2H)4p$           | [2]       |
|     |                 |                  | 421.94141             | Fe I  | $3d^64s^2$             | $3d^6(^3F2)4s4p(^3P^o)$ | [2]       |
| 916 | 422.42          | 242              | 422.417129            | Fe II | $3d^6(^3F1)4p$         | $3d^6(^5D)6d$           | [1]       |
|     |                 |                  | 422.41714             | Fe I  | $3d^6(^5D)4s4p(^3P^o)$ | $3d^6(^5D)4s(^6D)4d$    | [2]       |
| 917 | 422.594         | 280              | 422.59554             | Fe I  | $3d^7(^2G)4s$          | $3d^6(^3G)4s4p(^3P^o)$  | [2]       |
|     |                 |                  | 422.60787             | Fe II | $3d^6(^5D)5p$          | $3d^6(^5D)7s$           | [1]       |
|     |                 |                  | 422.60787             | Fe II | $3d^6(^5D)5p$          | $3d^6(^5D)6d$           | [1]       |
| 918 | 422.641         | 52               | 422.63426             | Fe I  | $3d^64s^2$             | $3d^6(^3H)4s4p(^3P^o)$  | [2]       |
|     |                 |                  | 422.64237             | Fe I  | $3d^7(^4P)4s$          | $3d^6(^3P2)4s4p(^3P^o)$ | [2]       |
| 919 | 423.525         | 63               | 423.5387              | Fe I  | $3d^6(^5D)4s4p(^3P^o)$ | $3d^6(^5D)4s(^6D)4d$    | [2]       |
|     |                 |                  | 423.5387              | Fe II | $3d^6(^5D)5p$          | $3d^6(^5D)6d$           | [1]       |
| 920 | 423.595         | 6068             | 423.5817              | Fe I  | $3d^64s^2$             | $3d^6(^3H)4s4p(^3P^o)$  | [2]       |
|     |                 |                  | 423.59367             | Fe I  | $3d^6(^5D)4s4p(^3P^o)$ | $3d^6(^5D)4s(^6D)5s$    | [2]       |
| 921 | 423.979         | 167              | 423.97321             | Fe I  | $3d^64s^2$             | $3d^6(^3G)4s4p(^3P^o)$  | [2]       |
|     |                 |                  | 423.98474             | Fe I  | $3d^7(^2G)4s$          | $3d^6(^3H)4s4p(^3P^o)$  | [2]       |
| 922 | 424.06          | 23               | 424.04893             | Fe II | $3d^6(^5D)5p$          | $3d^6(^5D)6d$           | [1]       |
|     |                 |                  | 424.064               | Fe II | $3d^6(^5D)5p$          | $3d^6(^5D)6d$           | [1]       |
|     |                 |                  | 424.06938             | Fe I  | $3d^64s^2$             | $3d^6(^3G)4s4p(^3P^o)$  | [2]       |
| 923 | 424.269         | 22               | 424.25957             | Fe I  | $3d^7(^2G)4s$          | $3d^6(^3H)4s4p(^3P^o)$  | [2]       |
|     |                 |                  | 424.27291             | Fe I  | $3d^7(^2D2)4s$         | $3d^7(^2P)4p$           | [2]       |
| 924 | 424.525         | 113              | 424.52569             | Fe I  | $3d^7(^4P)4s$          | $3d^6(^3P2)4s4p(^3P^o)$ | [2]       |
|     |                 |                  | 424.53441             | Fe I  | $3d^6(^5D)4s4p(^3P^o)$ | $3d^6(^5D)4s(^6D)4d$    | [2]       |
| 925 | 424.606         | 30               | 424.60125             | Fe I  | $3d^7(^2D2)4s$         | $3d^7(^2P)4p$           | [2]       |
|     |                 |                  | 424.60847             | Fe I  | $3d^64s^2$             | $3d^7(^2D2)4p$          | [2]       |
| 926 | 425.013         | 3654             | 424.9993              | Fe II | $3d^6(^5D)4d$          | $3d^6(^5D)6p$           | [1]       |
|     |                 |                  | 425.01192             | Fe I  | $3d^6(^5D)4s4p(^3P^o)$ | $3d^6(^5D)4s(^6D)5s$    | [2]       |
|     |                 |                  | 425.0191              | Fe I  | $3d^64s^2$             | $3d^6(^3H)4s4p(^3P^o)$  | [2]       |
| 927 | 425.083         | 5092             | 425.07866             | Fe I  | $3d^7(^4F)4s$          | $3d^7(^4F)4p$           | [2]       |

| No. | Wavelength (nm) | Intensity (a.u.) | Wavelength (nm), Ref. | Type  | Lower energy level     | Higher energy level     | Reference |
|-----|-----------------|------------------|-----------------------|-------|------------------------|-------------------------|-----------|
|     |                 |                  | 425.08915             | Fe I  | $3d^7(^2P)4s$          | $3d^5(^6S)4s^24p$       | [2]       |
| 928 | 425.629         | 50               | 425.6205              | Fe I  | $3d^6(^5D)4s4p(^3P^o)$ | $3d^6(^5D)4s(^6D)4d$    | [2]       |
|     |                 |                  | 425.6267              | Fe II | $3d^6(^5D)5p$          | $3d^6(^5D)7s$           | [1]       |
|     |                 |                  | 425.6309              | Fe I  | $3d^64s^2$             | $3d^6(^3H)4s4p(^3P^o)$  | [2]       |
| 929 | 425.827         | 291              | 425.8155              | Fe II | $3d^6(^3P2)4s$         | $3d^6(^5D)4p$           | [5]       |
|     |                 |                  | 425.83156             | Fe I  | $3d^64s^2$             | $3d^6(^5D)4s4p(^3P^o)$  | [2]       |
| 930 | 429.415         | 1905             | 429.40374             | Fe I  | $3d^64s^2$             | $3d^6(^3P2)4s4p(^3P^o)$ | [2]       |
|     |                 |                  | 429.41245             | Fe I  | $3d^7(^4F)4s$          | $3d^7(^4F)4p$           | [2]       |
| 931 | 429.925         | 5437             | 429.9235              | Fe I  | $3d^6(^5D)4s4p(^3P^o)$ | $3d^6(^5D)4s(^6D)5s$    | [2]       |
|     |                 |                  | 429.9235              | Fe I  | $3d^7(^2H)4s$          | $3d^7(^2G)4p$           | [2]       |
| 932 | 430.934         | 127              | 430.93742             | Fe I  | $3d^64s^2$             | $3d^6(^3H)4s4p(^3P^o)$  | [2]       |
|     |                 |                  | 430.94535             | Fe I  | $3d^7(^2P)4s$          | $3d^5(^6S)4s^24p$       | [2]       |
| 933 | 432.581         | 58102            | 432.57616             | Fe I  | $3d^7(^4F)4s$          | $3d^7(^4F)4p$           | [2]       |
|     |                 |                  | 432.59397             | Fe I  | $3d^7(^2H)4s$          | $3d^7(^2G)4p$           | [2]       |
| 934 | 434.323         | 48               | 434.32161             | Fe I  | $3d^7(^4F)4p$          | $3d^7(^4F)6s$           | [2]       |
|     |                 |                  | 434.3271              | Fe I  | $3d^7(^2D2)4s$         | $3d^6(^3F2)4s4p(^3P^o)$ | [2]       |
| 935 | 435.854         | 50               | 435.84989             | Fe I  | $3d^64s^2$             | $3d^7(^4P)4p$           | [2]       |
|     |                 |                  | 435.8684              | Fe I  | $3d^7(^2P)4s$          | $3d^7(^4P)4p$           | [2]       |
| 936 | 437.593         | 35908            | 437.59298             | Fe I  | $3d^64s^2$             | $3d^6(^5D)4s4p(^3P^o)$  | [2]       |
|     |                 |                  | 437.59859             | Fe I  | $3d^7(^2G)4s$          | $3d^6(^3G)4s4p(^3P^o)$  | [2]       |
| 937 | 438.925         | 115              | 438.92446             | Fe II | $3d^6(^5D)5p$          | $3d^6(^5D)7s$           | [1]       |
|     |                 |                  | 438.9245              | Fe I  | $3d^64s^2$             | $3d^6(^5D)4s4p(^3P^o)$  | [2]       |
| 938 | 439.307         | 196              | 439.3024              | Fe I  | $3d^7(^2P)4s$          | $3d^6(^3F2)4s4p(^3P^o)$ | [2]       |
|     |                 |                  | 439.309               | Fe I  | $3d^7(^4F)4p$          | $3d^64s(^6D)5d$         | [2]       |
| 939 | 440.777         | 48               | 440.7657              | Fe I  | $3d^7(^2P)4s$          | $3d^7(^4P)4p$           | [2]       |
|     |                 |                  | 440.77089             | Fe I  | $3d^7(^4P)4s$          | $3d^6(^5D)4s4p(^1P^o)$  | [2]       |
| 940 | 443.517         | 153              | 443.51486             | Fe I  | $3d^64s^2$             | $3d^6(^5D)4s4p(^3P^o)$  | [2]       |
|     |                 |                  | 443.52653             | Fe II | $3d^6(^3F1)4p$         | $3d^6(^5D)7s$           | [1]       |
| 941 | 444.314         | 197              | 444.3194              | Fe I  | $3d^7(^4P)4s$          | $3d^6(^3P2)4s4p(^3P^o)$ | [2]       |
|     |                 |                  | 444.3194              | Fe I  | $3d^7(^2P)4s$          | $3d^7(^4P)4p$           | [2]       |
| 942 | 444.684         | 45               | 444.68318             | Fe I  | $3d^6(^5D)4s4p(^3P^o)$ | $3d^6(^5D)4s(^4D)5s$    | [2]       |
|     |                 |                  | 444.6896              | Fe I  | $3d^7(^2H)4s$          | $3d^7(^2G)4p$           | [2]       |
| 943 | 444.776         | 122              | 444.7717              | Fe I  | $3d^7(^4P)4s$          | $3d^6(^5D)4s4p(^1P^o)$  | [2]       |
|     |                 |                  | 444.7805              | Fe I  | $3d^7(^4F)4p$          | $3d^7(^4F)6s$           | [2]       |
|     |                 |                  | 444.78054             | Fe II | $3d^6(^3F1)4s$         | $3d^6(^3D)4p$           | [1]       |
|     |                 |                  | 444.78054             | Fe II | $3d^5(^4G)4s4p(^3P^o)$ | $3d^6(^5D)6d$           | [1]       |



| No. | Wavelength (nm) | Intensity (a.u.) | Wavelength (nm), Ref. | Type  | Lower energy level     | Higher energy level     | Reference |
|-----|-----------------|------------------|-----------------------|-------|------------------------|-------------------------|-----------|
| 944 | 446.161         | 8771             | 446.16525             | Fe I  | $3d^6 4s^2$            | $3d^6(^5D)4s4p(^3P^o)$  | [2]       |
|     |                 |                  | 446.17108             | Fe II | $3d^6(^3P1)4s$         | $3d^6(^3D)4p$           | [1]       |
| 945 | 446.473         | 59               | 446.46872             | Fe I  | $3d^6(^5D)4s4p(^3P^o)$ | $3d^7(^4F)5s$           | [2]       |
|     |                 |                  | 446.47662             | Fe I  | $3d^7(^2P)4s$          | $3d^6(^3P2)4s4p(^3P^o)$ | [2]       |
| 946 | 447.603         | 952              | 447.60183             | Fe I  | $3d^7(^4P)4s$          | $3d^6(^3P2)4s4p(^3P^o)$ | [2]       |
|     |                 |                  | 447.60752             | Fe I  | $3d^6(^5D)4s4p(^3P^o)$ | $3d^6(^5D)4s(^6D)4d$    | [2]       |
| 947 | 448.215         | 2974             | 448.21696             | Fe I  | $3d^6 4s^2$            | $3d^6(^5D)4s4p(^3P^o)$  | [2]       |
|     |                 |                  | 448.22524             | Fe I  | $3d^7(^4P)4s$          | $3d^6(^5D)4s4p(^1P^o)$  | [2]       |
| 948 | 448.814         | 78               | 448.8081              | Fe II | $3d^6(^5D)4d$          | $3d^5(^2F1)4s4p(^3P^o)$ | [1]       |
|     |                 |                  | 448.81328             | Fe I  | $3d^6(^5D)4s4p(^3P^o)$ | $3d^6(^5D)4s(^6D)4d$    | [2]       |
| 949 | 449.344         | 51               | 449.337               | Fe I  | $3d^7(^2H)4s$          | $3d^6(^3G)4s4p(^3P^o)$  | [2]       |
|     |                 |                  | 449.3525              | Fe II | $3d^6(^3F2)4p$         | $3d^6(^5D)4d$           | [1]       |
| 950 | 449.459         | 311              | 449.44645             | Fe I  | $3d^6 4s^2$            | $3d^6(^3H)4s4p(^3P^o)$  | [2]       |
|     |                 |                  | 449.45629             | Fe I  | $3d^7(^4P)4s$          | $3d^6(^5D)4s4p(^1P^o)$  | [2]       |
| 951 | 452.648         | 43               | 452.63986             | Fe I  | $3d^6(^5D)4s4p(^3P^o)$ | $3d^7(^4F)4d$           | [2]       |
|     |                 |                  | 452.65605             | Fe I  | $3d^7(^2P)4s$          | $3d^7(^4P)4p$           | [2]       |
|     |                 |                  | 452.65949             | Fe II | $3d^6(^1F)4s$          | $3d^6(^3F2)4p$          | [1]       |
| 952 | 452.856         | 1451             | 452.8479              | Fe I  | $3d^7(^4F)4p$          | $3d^6 4s(^6D)7s$        | [2]       |
|     |                 |                  | 452.86139             | Fe I  | $3d^7(^4P)4s$          | $3d^6(^5D)4s4p(^1P^o)$  | [2]       |
| 953 | 452.959         | 53               | 452.95508             | Fe I  | $3d^6(^5D)4s4p(^3P^o)$ | $3d^7(^4F)4d$           | [2]       |
|     |                 |                  | 452.96758             | Fe I  |                        |                         | [2]       |
| 954 | 453.639         | 71               | 453.6486              | Fe I  | $3d^6 4s^2$            | $3d^6(^3G)4s4p(^3P^o)$  | [2]       |
|     |                 |                  | 453.6535              | Fe II | $3d^6(^3P1)4p$         | $3d^6(^3D)5s$           | [1]       |
| 955 | 456.533         | 104              | 456.53099             | Fe I  | $3d^7(^2D2)4s$         | $3d^7(^4P)4p$           | [2]       |
|     |                 |                  | 456.54112             | Fe I  | $3d^7(^4F)4p$          | $3d^7(^4F)6s$           | [2]       |
| 956 | 456.694         | 49               | 456.68665             | Fe I  | $3d^7(^4F)4p$          | $3d^6 4s(^6D)5d$        | [2]       |
|     |                 |                  | 456.69882             | Fe I  | $3d^7(^2P)4s$          | $3d^7(^2G)4p$           | [2]       |
| 957 | 456.89          | 62               | 456.87629             | Fe I  | $3d^6(^5D)4s4p(^3P^o)$ | $3d^7(^4F)5s$           | [2]       |
|     |                 |                  | 456.88389             | Fe I  | $3d^6 4s^2$            | $3d^7(^2D2)4p$          | [2]       |
| 958 | 458.479         | 53               | 458.4716              | Fe I  | $3d^6(^5D)4s4p(^3P^o)$ | $3d^6(^5D)4s(^6D)4d$    | [2]       |
|     |                 |                  | 458.48189             | Fe I  | $3d^6(^5D)4s4p(^3P^o)$ | $3d^6(^5D)4s(^6D)4d$    | [2]       |
| 959 | 459.652         | 72               | 459.64152             | Fe I  | $3d^6(^5D)4s4p(^3P^o)$ | $3d^6(^5D)4s(^6D)4d$    | [2]       |
|     |                 |                  | 459.65745             | Fe I  | $3d^7(^2H)4s$          | $3d^6(^3G)4s4p(^3P^o)$  | [2]       |
| 960 | 459.825         | 96               | 459.81168             | Fe I  | $3d^6(^5D)4s4p(^3P^o)$ | $3d^7(^4F)5s$           | [2]       |
|     |                 |                  | 459.8367              | Fe I  | $3d^6(^5D)4s4p(^3P^o)$ | $3d^7(^4F)4d$           | [2]       |
| 961 | 460.779         | 74               | 460.7647              | Fe I  | $3d^6(^5D)4s4p(^3P^o)$ | $3d^7(^4F)4d$           | [2]       |

| No. | Wavelength (nm) | Intensity (a.u.) | Wavelength (nm), Ref. | Type  | Lower energy level     | Higher energy level     | Reference |
|-----|-----------------|------------------|-----------------------|-------|------------------------|-------------------------|-----------|
|     |                 |                  | 460.7647              | Fe I  | $3d^6(^5D)4s4p(^3P^o)$ | $3d^7(^4F)5s$           | [2]       |
| 962 | 461.377         | 66               | 461.3903              | Fe I  | $3d^6(^5D)4s4p(^1P^o)$ |                         | [2]       |
| 963 | 461.4           | 74               | 461.3903              | Fe I  | $3d^6(^5D)4s4p(^1P^o)$ |                         | [2]       |
| 964 | 468.204         | 93               | 468.2065              | Fe II | $3d^6(^1F)4p$          | $3d^6(^3H)4d$           | [1]       |
|     |                 |                  | 468.21108             | Fe I  | $3d^6(^5D)4s4p(^1P^o)$ | $3d^64s(^4D)4d$         | [2]       |
| 965 | 468.742         | 162              | 468.73026             | Fe I  | $3d^7(^4F)4s$          | $3d^6(^5D)4s4p(^3P^o)$  | [2]       |
|     |                 |                  | 468.73862             | Fe I  | $3d^7(^4P)4s$          | $3d^6(^3F2)4s4p(^3P^o)$ | [2]       |
| 966 | 469.029         | 56               | 469.0369              | Fe I  | $3d^7(^2H)4s$          | $3d^6(^3G)4s4p(^3P^o)$  | [2]       |
|     |                 |                  | 469.0369              | Fe I  | $3d^7(^4F)4s$          | $3d^6(^5D)4s4p(^3P^o)$  | [2]       |
| 967 | 470.104         | 65               | 470.1044              | Fe I  | $3d^6(^5D)4s4p(^3P^o)$ | $3d^8$                  | [2]       |
|     |                 |                  | 470.1044              | Fe I  | $3d^6(^5D)4s4p(^3P^o)$ | $3d^6(^5D)4s(^6D)4d$    | [2]       |
| 968 | 470.734         | 219              | 470.72742             | Fe I  | $3d^6(^5D)4s4p(^3P^o)$ | $3d^7(^4F)5s$           | [2]       |
|     |                 |                  | 470.74874             | Fe I  | $3d^7(^4P)4s$          | $3d^6(^3P2)4s4p(^3P^o)$ | [2]       |
| 969 | 470.894         | 918              | 470.89682             | Fe I  | $3d^64s^2$             | $3d^7(^2G)4p$           | [2]       |
|     |                 |                  | 470.90878             | Fe I  | $3d^6(^5D)4s4p(^3P^o)$ | $3d^6(^5D)4s(^6D)4d$    | [2]       |
| 970 | 473.294         | 56               | 473.2928              | Fe II | $3d^5(^4G)4s4p(^3P^o)$ | $3d^6(^5D)7s$           | [1]       |
|     |                 |                  | 473.2928              | Fe II | $3d^6(^1F)4p$          | $3d^6(^3F2)4d$          | [1]       |
| 971 | 480.28          | 70               | 480.28794             | Fe I  | $3d^64s^2$             | $3d^6(^3F2)4s4p(^3P^o)$ | [2]       |
|     |                 |                  | 480.28794             | Fe I  | $3d^64s^2$             | $3d^7(^2P)4p$           | [2]       |
| 972 | 483.864         | 110              | 483.85115             | Fe I  | $3d^6(^5D)4s4p(^3P^o)$ | $3d^7(^4F)5s$           | [2]       |
|     |                 |                  | 483.85511             | Fe II | $3d^6(^5D)4d$          | $3d^6(^5D_1)4f$         | [1]       |
| 973 | 488.908         | 94               | 488.90012             | Fe I  | $3d^7(^4P)4s$          | $3d^7(^4F)4p$           | [2]       |
|     |                 |                  | 488.91018             | Fe I  | $3d^6(^5D)4s4p(^3P^o)$ | $3d^6(^5D)4s(^4D)5s$    | [2]       |
| 974 | 490.523         | 120              | 490.51325             | Fe I  | $3d^6(^5D)4s4p(^3P^o)$ | $3d^6(^5D)4s(^6D)4d$    | [2]       |
|     |                 |                  | 490.5216              | Fe I  | $3d^7(^2H)4s$          | $3d^6(^3H)4s4p(^3P^o)$  | [2]       |
| 975 | 491.329         | 73               | 491.3143              | Fe I  | $3d^7(^4F)4p$          | $3d^7(^4F)6s$           | [2]       |
|     |                 |                  | 491.3184              | Fe II | $3d^6(^5D)4d$          | $3d^6(^5D_3)4f$         | [1]       |
|     |                 |                  | 491.32951             | Fe II | $3d^6(^5D)4d$          | $3d^6(^5D_3)4f$         | [1]       |
| 976 | 491.897         | 2573             | 491.89535             | Fe I  | $3d^7(^4F)4p$          | $3d^7(^4F)4d$           | [2]       |
|     |                 |                  | 491.89937             | Fe I  | $3d^6(^5D)4s4p(^3P^o)$ | $3d^6(^5D)4s(^6D)5s$    | [2]       |
| 977 | 493.339         | 73               | 493.32945             | Fe I  | $3d^7(^2D2)4s$         | $3d^7(^4P)4p$           | [2]       |
|     |                 |                  | 493.3341              | Fe I  | $3d^7(^4F)4p$          | $3d^7(^4F)4d$           | [2]       |
| 978 | 493.407         | 77               | 493.40049             | Fe I  | $3d^7(^4F)4p$          | $3d^7(^4F)4d$           | [2]       |
|     |                 |                  | 493.40836             | Fe I  | $3d^7(^2H)4s$          | $3d^6(^3F2)4s4p(^3P^o)$ | [2]       |
| 979 | 494.382         | 59               | 494.37023             | Fe II | $3d^6(^3H)4p$          | $3d^54s^2$              | [1]       |
|     |                 |                  | 494.37023             | Fe II | $3d^6(^3P2)4p$         | $3d^6(^5D)5s$           | [1]       |

| No.      | Wavelength (nm) | Intensity (a.u.) | Wavelength (nm), Ref. | Type   | Lower energy level     | Higher energy level      | Reference |
|----------|-----------------|------------------|-----------------------|--------|------------------------|--------------------------|-----------|
| 980      | 495.758         | 35781            | 495.75965             | Fe I   | $3d^6(^5D)4s4p(^3P^o)$ | $3d^6(^5D)4s(^6D)5s$     | [2]       |
|          |                 |                  | 495.76793             | Fe I   | $3d^7(^4F)4p$          | $3d^7(^4F)4d$            | [2]       |
| 981      | 497.866         | 66               | 497.8603              | Fe I   | $3d^6(^5D)4s4p(^3P^o)$ | $3d^6(^5D)4s(^4D)5s$     | [2]       |
|          |                 |                  | 497.8691              | Fe I   | $3d^8$                 | $3d^6(^3G)4s4p(^3P^o)$   | [2]       |
| 982      | 498.329         | 124              | 498.32504             | Fe I   | $3d^7(^4F)4p$          | $3d^7(^4F)4d$            | [2]       |
|          |                 |                  | 498.3341              | Fe I   | $3d^6(^5D)4s4p(^1P^o)$ | $3d^7(^4F)6s$            | [2]       |
| 983      | 499.185         | 49               | 499.18                | Fe I   | $3d^7(^4P)4s$          | $3d^6(^3P_2)4s4p(^3P^o)$ | [2]       |
|          |                 |                  | 499.1867              | Fe I   | $3d^7(^4F)4p$          | $3d^7(^4F)4d$            | [2]       |
| 984      | 499.37          |                  | 499.36802             | Fe I   | $3d^6(^5D)4s4p(^3P^o)$ | $3d^7(^4F)4d$            | [2]       |
| 499.3751 |                 |                  | Fe I                  | $3d^8$ | $3d^7(^4F)5p$          | [2]                      |           |
| 985      | 500.191         | 622              | 500.18633             | Fe I   | $3d^6(^5D)4s4p(^3P^o)$ | $3d^6(^5D)4s(^4D)5s$     | [2]       |
|          |                 |                  | 500.19529             | Fe II  | $3d^6(^5D)4d$          | $3d^6(^5D_4)4f$          | [1]       |
| 986      | 500.226         | 102              | 500.2175              | Fe II  | $3d^5(^4G)4s4p(^3P^o)$ | $3d^54s(^5S)4d$          | [1]       |
|          |                 |                  | 500.2386              | Fe II  | $3d^6(^5D)4d$          | $3d^6(^5D_2)4f$          | [1]       |
| 987      | 500.411         | 52               | 500.4044              | Fe I   | $3d^6(^5D)4s4p(^3P^o)$ | $3d^7(^4F)4d$            | [2]       |
|          |                 |                  | 500.41881             | Fe II  | $3d^6(^5D)4d$          | $3d^6(^5D_4)4f$          | [1]       |
| 988      | 501.208         | 966              | 501.1984              | Fe II  | $3d^6(^5D)4d$          | $3d^6(^5D_3)4f$          | [1]       |
|          |                 |                  | 501.20681             | Fe I   | $3d^7(^4F)4s$          | $3d^6(^5D)4s4p(^3P^o)$   | [2]       |
|          |                 |                  | 501.21576             | Fe I   | $3d^7(^4F)4p$          | $3d^7(^4F)4d$            | [2]       |
| 989      | 502.156         | 50               | 502.15907             | Fe II  | $3d^6(^5D)4d$          | $3d^6(^5D_4)4f$          | [1]       |
|          |                 |                  | 502.1591              | Fe I   | $3d^7(^4F)4p$          | $3d^7(^4F)4d$            | [2]       |
|          |                 |                  | 502.16832             | Fe I   | $3d^7(^4F)4p$          | $3d^7(^4F)4d$            | [2]       |
| 990      | 502.283         | 106              | 502.27888             | Fe II  | $3d^6(^5D)4d$          | $3d^6(^5D_4)4f$          | [1]       |
|          |                 |                  | 502.2789              | Fe I   | $3d^64s^2$             | $3d^6(^3F_2)4s4p(^3P^o)$ | [2]       |
| 991      | 502.71          | 121              | 502.71227             | Fe I   | $3d^7(^4F)4p$          | $3d^7(^4F)4d$            | [2]       |
|          |                 |                  | 502.7225              | Fe I   | $3d^64s^2$             | $3d^7(^2G)4p$            | [2]       |
|          |                 |                  | 502.7225              | Fe II  | $3d^6(^5D)4d$          | $3d^6(^5D_2)4f$          | [1]       |
| 992      | 503.067         | 86               | 503.06317             | Fe II  | $3d^6(^5D)4d$          | $3d^6(^5D_4)4f$          | [1]       |
|          |                 |                  | 503.07783             | Fe I   | $3d^7(^2H)4s$          | $3d^6(^3H)4s4p(^3P^o)$   | [2]       |
| 993      | 503.575         | 69               | 503.56999             | Fe I   |                        |                          | [2]       |
|          |                 |                  | 503.56999             | Fe II  | $3d^6(^5D)4d$          | $3d^6(^5D_4)4f$          | [1]       |
| 994      | 504.014         | 55               | 504.024               | Fe I   | $3d^7(^4F)4p$          | $3d^7(^4F)4d$            | [2]       |
|          |                 |                  | 504.024               | Fe II  | $3d^6(^5D)5p$          | $3d^6(^3G)4d$            | [1]       |
| 995      | 504.175         | 2701             | 504.17557             | Fe I   | $3d^7(^4F)4s$          | $3d^6(^5D)4s4p(^3P^o)$   | [2]       |
|          |                 |                  | 504.18482             | Fe I   | $3d^7(^4F)4p$          | $3d^7(^4F)4d$            | [2]       |

| No.  | Wavelength (nm) | Intensity (a.u.) | Wavelength (nm), Ref. | Type  | Lower energy level     | Higher energy level      | Reference |
|------|-----------------|------------------|-----------------------|-------|------------------------|--------------------------|-----------|
| 996  | 504.844         | 65               | 504.84356             | Fe II | $3d^6(^5D)4d$          | $3d^6(^5D_4)4f$          | [1]       |
|      |                 |                  | 504.8436              | Fe I  | $3d^6(^5D)4s4p(^3P^o)$ | $3d^6(^5D)4s(^4D)5s$     | [2]       |
| 997  | 506.008         | 58               | 506.00341             | Fe I  | $3d^7(^4F)4p$          | $3d^7(^4F)4d$            | [2]       |
|      |                 |                  | 506.00787             | Fe I  | $3d^64s^2$             | $3d^6(^5D)4s4p(^3P^o)$   | [2]       |
| 998  | 506.503         | 196              | 506.49524             | Fe I  | $3d^7(^4F)4p$          | $3d^7(^4F)4d$            | [2]       |
|      |                 |                  | 506.50181             | Fe I  | $3d^7(^4F)4p$          | $3d^7(^4F)4d$            | [2]       |
|      |                 |                  | 506.51057             | Fe II | $3d^6(^5D)4d$          | $3d^6(^5D_1)4f$          | [1]       |
| 999  | 507.263         | 49               | 507.25629             | Fe II | $3d^6(^5D)4d$          | $3d^6(^5D_2)4f$          | [1]       |
|      |                 |                  | 507.26718             | Fe I  | $3d^7(^4F)4p$          | $3d^7(^4F)4d$            | [2]       |
| 1000 | 507.62          | 61               | 507.62642             | Fe I  | $3d^7(^4F)4p$          | $3d^7(^4F)4d$            | [2]       |
|      |                 |                  | 507.6325              | Fe II | $3d^6(^5D)4d$          | $3d^6(^5D_3)4f$          | [1]       |
| 1001 | 508.035         | 2564             | 508.0222              | Fe II | $3d^6(^5D)4d$          | $3d^6(^5D_2)4f$          | [1]       |
|      |                 |                  | 508.03514             | Fe I  | $3d^64s^2$             | $3d^6(^3F_2)4s4p(^3P^o)$ | [2]       |
| 1002 | 509.07          | 92               | 509.07734             | Fe II | $3d^6(^5D)4d$          | $3d^6(^5D)6p$            | [1]       |
|      |                 |                  | 509.07736             | Fe I  | $3d^7(^4F)4p$          | $3d^7(^4F)4d$            | [2]       |
| 1003 | 509.703         | 123              | 509.69048             | Fe II | $3d^6(^5D)4d$          | $3d^6(^5D_3)4f$          | [1]       |
|      |                 |                  | 509.69977             | Fe I  | $3d^7(^4F)4p$          | $3d^7(^4F)4d$            | [2]       |
| 1004 | 509.864         | 119              | 509.85719             | Fe I  | $3d^6(^5D)4s4p(^3P^o)$ | $3d^6(^5D)4s(^4D)5s$     | [2]       |
|      |                 |                  | 509.86978             | Fe I  | $3d^7(^4P)4s$          | $3d^6(^5D)4s4p(^1P^o)$   | [2]       |
| 1005 | 510.071         | 92               | 510.06116             | Fe II | $3d^6(^5D)4d$          | $3d^6(^5D_3)4f$          | [1]       |
|      |                 |                  | 510.07339             | Fe II | $3d^6(^5D)4d$          | $3d^6(^5D_3)4f$          | [1]       |
|      |                 |                  | 510.0854              | Fe II | $3d^7$                 | $3d^6(^3F_2)4p$          | [1]       |
| 1006 | 510.76          | 1350             | 510.75413             | Fe II | $3d^6(^5D)4d$          | $3d^6(^5D_3)4f$          | [1]       |
|      |                 |                  | 510.76407             | Fe I  | $3d^7(^4F)4s$          | $3d^6(^5D)4s4p(^3P^o)$   | [2]       |
| 1007 | 511.036         | 4555             | 511.03585             | Fe I  | $3d^7(^2H)4s$          | $3d^7(^2G)4p$            | [2]       |
|      |                 |                  | 511.04128             | Fe I  | $3d^64s^2$             | $3d^6(^5D)4s4p(^3P^o)$   | [2]       |
| 1008 | 511.3           | 52               | 511.2917              | Fe I  | $3d^6(^5D)4s4p(^1P^o)$ | $3d^64s(^4D)4d$          | [2]       |
|      |                 |                  | 511.2917              | Fe II | $3d^6(^3H)4d$          | $3d^6(^3H_4)4f$          | [1]       |
|      |                 |                  | 511.29992             | Fe II | $3d^6(^5D)4d$          | $3d^6(^5D_3)4f$          | [1]       |
| 1009 | 511.84          | 51               | 511.8396              | Fe II | $3d^6(^3H)4d$          | $3d^6(^3H_5)4f$          | [1]       |
|      |                 |                  | 511.849               | Fe II | $3d^6(^3G)4p$          | $3d^6(^5D)4d$            | [1]       |
| 1010 | 512.735         | 160              | 512.73068             | Fe II | $3d^6(^3H)4d$          | $3d^6(^3H_5)4f$          | [1]       |
|      |                 |                  | 512.7359              | Fe I  | $3d^7(^4F)4s$          | $3d^6(^5D)4s4p(^3P^o)$   | [2]       |
| 1011 | 513.94          | 1523             | 513.92511             | Fe I  | $3d^6(^5D)4s4p(^3P^o)$ | $3d^6(^5D)4s(^6D)5s$     | [2]       |
|      |                 |                  | 513.94625             | Fe I  | $3d^6(^5D)4s4p(^3P^o)$ | $3d^6(^5D)4s(^6D)5s$     | [2]       |

| No.  | Wavelength (nm) | Intensity (a.u.) | Wavelength (nm), Ref. | Type  | Lower energy level     | Higher energy level    | Reference |
|------|-----------------|------------------|-----------------------|-------|------------------------|------------------------|-----------|
| 1012 | 514.169         | 60               | 514.1564              | Fe II | $3d^6(^3H)4d$          | $3d^6(^3H_4)4f$        | [1]       |
|      |                 |                  | 514.17387             | Fe I  | $3d^64s^2$             | $3d^7(^4F)4p$          | [2]       |
| 1013 | 514.25          | 128              | 514.235               | Fe II | $3d^6(^3P_1)4p$        | $3d^6(^3F_2)4d$        | [1]       |
|      |                 |                  | 514.235               | Fe II | $3d^6(^3H)4d$          | $3d^6(^3H_4)4f$        | [1]       |
|      |                 |                  | 514.24938             | Fe I  | $3d^7(^4F)4p$          | $3d^7(^4F)4d$          | [2]       |
|      |                 |                  | 514.25409             | Fe I  | $3d^7(^4F)4p$          | $3d^7(^4F)4d$          | [2]       |
| 1014 | 514.582         | 76               | 514.57299             | Fe II | $3d^6(^5D)4d$          | $3d^6(^5D_3)4f$        | [1]       |
|      |                 |                  | 514.5822              | Fe II | $3d^6(^5D)4d$          | $3d^6(^5D_3)4f$        | [1]       |
| 1015 | 514.8           | 247              | 514.80424             | Fe II | $3d^6(^3H)4d$          | $3d^6(^3H_5)4f$        | [1]       |
|      |                 |                  | 514.80425             | Fe I  | $3d^7(^4F)4p$          | $3d^7(^4F)4d$          | [2]       |
| 1016 | 515.006         | 160              | 515.01967             | Fe II | $3d^6(^5D)5d$          | $3d^6(^3H_4)4f$        | [1]       |
|      |                 |                  | 515.01968             | Fe I  | $3d^7(^2H)4s$          | $3d^6(^3G)4s4p(^3P^o)$ | [2]       |
| 1017 | 515.075         | 112              | 515.0611              | Fe II | $3d^6(^5D)5p$          | $3d^6(^3G)4d$          | [1]       |
|      |                 |                  | 515.08392             | Fe I  | $3d^7(^4F)4s$          | $3d^6(^5D)4s4p(^3P^o)$ | [2]       |
| 1018 | 515.19          | 520              | 515.19104             | Fe II | $3d^6(^5D)4d$          | $3d^6(^5D_2)4f$        | [1]       |
|      |                 |                  | 515.1911              | Fe I  | $3d^7(^4F)4s$          | $3d^6(^5D)4s4p(^3P^o)$ | [2]       |
| 1019 | 515.66          | 64               | 515.64549             | Fe II | $3d^6(^3H)4d$          | $3d^6(^3H_6)4f$        | [1]       |
|      |                 |                  | 515.6517              | Fe II | $3d^6(^3H)4d$          | $3d^6(^3H_4)4f$        | [1]       |
|      |                 |                  | 515.6749              | Fe II | $3d^6(^5D)5p$          | $3d^6(^3G)4d$          | [1]       |
| 1020 | 516.627         | 1159             | 516.61958             | Fe II | $3d^6(^3G)4d$          | $3d^6(^3G_5)4f$        | [1]       |
|      |                 |                  | 516.62819             | Fe I  | $3d^64s^2$             | $3d^6(^5D)4s4p(^3P^o)$ | [2]       |
| 1021 | 516.892         | 1405             | 516.88978             | Fe I  | $3d^64s^2$             | $3d^6(^5D)4s4p(^3P^o)$ | [2]       |
|      |                 |                  | 516.90282             | Fe II | $3d^54s^2$             | $3d^6(^5D)4p$          | [1]       |
| 1022 | 517.168         | 10923            | 517.1596              | Fe I  | $3d^7(^4F)4s$          | $3d^6(^5D)4s4p(^3P^o)$ | [2]       |
|      |                 |                  | 517.16728             | Fe I  | $3d^64s^2$             | $3d^6(^3H)4s4p(^3P^o)$ | [2]       |
| 1023 | 518.422         | 52               | 518.41757             | Fe I  | $3d^7(^4F)4p$          | $3d^7(^4F)4d$          | [2]       |
|      |                 |                  | 518.41757             | Fe II | $3d^6(^3H)4d$          | $3d^6(^3H_6)4f$        | [1]       |
|      |                 |                  | 518.42657             | Fe I  | $3d^7(^4F)4p$          | $3d^7(^4F)4d$          | [2]       |
| 1024 | 519.491         | 3209             | 519.48884             | Fe II | $3d^6(^5D)4d$          | $3d^6(^5D_2)4f$        | [1]       |
|      |                 |                  | 519.48884             | Fe II | $3d^6(^1I)5s$          | $3d^6(^3G_4)4f$        | [1]       |
|      |                 |                  | 519.49414             | Fe I  | $3d^7(^4F)4s$          | $3d^6(^5D)4s4p(^3P^o)$ | [2]       |
| 1025 | 519.549         | 149              | 519.54718             | Fe II | $3d^5(^4G)4s4p(^3P^o)$ | $3d^6(^5D)7s$          | [1]       |
|      |                 |                  | 519.54719             | Fe I  | $3d^7(^4F)4p$          | $3d^7(^4F)4d$          | [2]       |
| 1026 | 519.606         | 65               | 519.59369             | Fe II | $3d^6(^3H)4d$          | $3d^6(^3H_4)4f$        | [1]       |
|      |                 |                  | 519.60593             | Fe I  | $3d^7(^4F)4p$          | $3d^7(^4F)4d$          | [2]       |

| No.  | Wavelength (nm) | Intensity (a.u.) | Wavelength (nm), Ref. | Type  | Lower energy level           | Higher energy level          | Reference |
|------|-----------------|------------------|-----------------------|-------|------------------------------|------------------------------|-----------|
| 1027 | 519.629         | 54               | 519.63391             | Fe II | $3d^6(^3H)4d$                | $3d^6(^3H_6)4f$              | [1]       |
|      |                 |                  | 519.64398             | Fe II | $3d^6(^5D)4d$                | $3d^6(^5D_4)4f$              | [1]       |
| 1028 | 520.238         | 153              | 520.22561             | Fe I  | $3d^7(^4F)4p$                | $3d^7(^4F)4d$                | [2]       |
|      |                 |                  | 520.23357             | Fe I  | $3d^7(^4P)4s$                | $3d^6(^5D)4s4p(^1P^{\circ})$ | [2]       |
| 1029 | 521.524         | 249              | 521.51803             | Fe I  | $3d^6(^5D)4s4p(^3P^{\circ})$ | $3d^6(^5D)4s(^6D)5s$         | [2]       |
|      |                 |                  | 521.5347              | Fe II | $3d^6(^5D)4d$                | $3d^6(^5D_4)4f$              | [1]       |
| 1030 | 521.685         | 113              | 521.68585             | Fe II | $3d^6(^5D)4d$                | $3d^6(^5D_1)4f$              | [1]       |
|      |                 |                  | 521.68585             | Fe II | $3d^6(^5D)4d$                | $3d^6(^5D_2)4f$              | [1]       |
| 1031 | 522.718         | 63956            | 522.7076              | Fe II | $3d^6(^1F)4s$                | $3d^6(^3F_2)4p$              | [1]       |
|      |                 |                  | 522.71503             | Fe I  | $3d^64s^2$                   | $3d^7(^4F)4p$                | [2]       |
|      |                 |                  | 522.71891             | Fe I  | $3d^7(^4F)4s$                | $3d^6(^5D)4s4p(^3P^{\circ})$ | [2]       |
|      |                 |                  | 522.73174             | Fe II | $3d^6(^5D)4d$                | $3d^6(^5D_1)4f$              | [1]       |
| 1032 | 522.982         | 212              | 522.98482             | Fe I  | $3d^6(^5D)4s4p(^3P^{\circ})$ | $3d^6(^5D)4s(^6D)5s$         | [2]       |
|      |                 |                  | 522.98739             | Fe I  | $3d^7(^4F)4p$                | $3d^7(^4F)4d$                | [2]       |
| 1033 | 523.291         | 9127             | 523.27809             | Fe II | $3d^6(^5D)4d$                | $3d^6(^5D_4)4f$              | [1]       |
|      |                 |                  | 523.294               | Fe I  | $3d^6(^5D)4s4p(^3P^{\circ})$ | $3d^6(^5D)4s(^6D)5s$         | [2]       |
| 1034 | 523.544         | 63               | 523.53864             | Fe I  | $3d^8$                       | $3d^7(^2P)4p$                | [2]       |
|      |                 |                  | 523.5555              | Fe II | $3d^6(^3G)4d$                | $3d^6(^3G_5)4f$              | [1]       |
| 1035 | 524.048         | 220              | 524.0355              | Fe I  | $3d^7(^2H)4s$                | $3d^6(^3H)4s4p(^3P^{\circ})$ | [2]       |
|      |                 |                  | 524.04                | Fe II | $3d^6(^3H)4d$                | $3d^6(^3H_5)4f$              | [1]       |
|      |                 |                  | 524.058               | Fe II | $3d^6(^1G_1)4s$              | $3d^6(^1D_2)4p$              | [1]       |
| 1036 | 524.38          | 55               | 524.37766             | Fe I  | $3d^7(^4F)4p$                | $3d^7(^4F)4d$                | [2]       |
|      |                 |                  | 524.39227             | Fe II | $3d^6(^5D)4d$                | $3d^6(^5D_3)4f$              | [1]       |
| 1037 | 525.125         | 74               | 525.12252             | Fe II | $3d^6(^5D)4d$                | $3d^6(^5D_1)4f$              | [1]       |
|      |                 |                  | 525.13161             | Fe II | $3d^6(^3F_2)4d$              | $3d^6(^3F_2_4)4f$            | [1]       |
| 1038 | 525.263         | 53               | 525.2692              | Fe II | $3d^6(^5D_4)4f$              | $3d^6(^3H)6s$                | [1]       |
|      |                 |                  | 525.2692              | Fe II | $3d^6(^3H)4d$                | $3d^6(^3H_6)4f$              | [1]       |
| 1039 | 525.343         | 62               | 525.34614             | Fe I  | $3d^6(^5D)4s4p(^3P^{\circ})$ | $3d^6(^5D)4s(^6D)5s$         | [2]       |
|      |                 |                  | 525.35177             | Fe II | $3d^6(^5D)4d$                | $3d^6(^5D_3)4f$              | [1]       |
| 1040 | 530.546         | 88               | 530.54221             | Fe II | $3d^6(^3G)4d$                | $3d^6(^3G_4)4f$              | [1]       |
|      |                 |                  | 530.54223             | Fe I  | $3d^64s^2$                   | $3d^5(^6S)4s^24p$            | [2]       |
| 1041 | 531.059         | 48               | 531.0488              | Fe II | $3d^6(^3G)4d$                | $3d^6(^3G_4)4f$              | [1]       |
|      |                 |                  | 531.06301             | Fe II | $3d^6(^5D)4d$                | $3d^6(^5D_3)4f$              | [1]       |
| 1042 | 535.334         | 132              | 535.32538             | Fe II | $3d^6(^5D)4d$                | $3d^6(^5D_3)4f$              | [1]       |

| No.  | Wavelength (nm) | Intensity (a.u.) | Wavelength (nm), Ref. | Type  | Lower energy level | Higher energy level    | Reference |
|------|-----------------|------------------|-----------------------|-------|--------------------|------------------------|-----------|
|      |                 |                  | 535.33732             | Fe I  | $3d^7(^4F)4p$      | $3d^6(^5D)4s (^4D)5s$  | [2]       |
| 1043 | 537.58          | 70               | 537.58423             | Fe II | $3d^6(^5D)4d$      | $3d^6(^5D_2)4f$        | [1]       |
|      |                 |                  | 537.58423             | Fe II | $3d^6(^5D)4d$      | $3d^6(^5D_4)4f$        | [1]       |
| 1044 | 539.135         | 92               | 539.1246              | Fe I  | $3d^7(^2H)4s$      | $3d^6(^3G)4s4p(^3P^o)$ | [2]       |
|      |                 |                  | 539.1246              | Fe II | $3d^6(^5D)4d$      | $3d^6(^5D_4)4f$        | [1]       |
|      |                 |                  | 539.14582             | Fe I  | $3d^7(^4F)4p$      | $3d^6(^5D)4s (^4D)5s$  | [2]       |
| 1045 | 539.718         | 5505             | 539.71276             | Fe I  | $3d^7(^4F)4s$      | $3d^6(^5D)4s4p(^3P^o)$ | [2]       |
|      |                 |                  | 539.72019             | Fe I  | $3d^7(^4F)4p$      | $3d^7(^4F)4d$          | [2]       |
| 1046 | 540.061         | 65527            | 540.05018             | Fe I  | $3d^7(^4F)4p$      | $3d^7(^4F)4d$          | [2]       |
|      |                 |                  | 540.06555             | Fe I  | $3d^64s^2$         | $3d^6(^3G)4s4p(^3P^o)$ | [2]       |
| 1047 | 540.198         | 61               | 540.18855             | Fe II | $3d^6(^5D)4d$      | $3d^6(^5D_1)4f$        | [1]       |
|      |                 |                  | 540.20576             | Fe II | $3d^6(^5D)4d$      | $3d^6(^5D_2)4f$        | [1]       |
| 1048 | 540.415         | 1248             | 540.41168             | Fe I  | $3d^7(^4F)4p$      | $3d^7(^4F)4d$          | [2]       |
|      |                 |                  | 540.41513             | Fe I  | $3d^7(^4F)4p$      | $3d^7(^4F)4d$          | [2]       |
| 1049 | 540.575         | 6019             | 540.56611             | Fe II | $3d^6(^5D)4d$      | $3d^6(^5D_3)4f$        | [1]       |
|      |                 |                  | 540.57749             | Fe I  | $3d^7(^4F)4s$      | $3d^6(^5D)4s4p(^3P^o)$ | [2]       |
| 1050 | 541.134         | 89               | 541.13735             | Fe II | $3d^6(^3F_2)4d$    | $3d^6(^3P_2)4f$        | [1]       |
|      |                 |                  | 541.13735             | Fe II | $3d^6(^5D)4d$      | $3d^6(^5D_1)4f$        | [1]       |
| 1051 | 541.271         | 141              | 541.27429             | Fe II | $3d^6(^5D)4d$      | $3d^6(^5D_3)4f$        | [1]       |
|      |                 |                  | 541.2785              | Fe I  | $3d^7(^4F)4p$      | $3d^7(^4F)4d$          | [2]       |
| 1052 | 542.789         | 77               | 542.7818              | Fe II | $3d^6(^5D)5d$      | $3d^6(^3P_2)4f$        | [1]       |
|      |                 |                  | 542.7818              | Fe II | $3d^54s^2$         | $3d^6(^3D)4p$          | [1]       |
| 1053 | 542.972         | 8554             | 542.96964             | Fe I  | $3d^7(^4F)4s$      | $3d^6(^5D)4s4p(^3P^o)$ | [2]       |
|      |                 |                  | 542.98391             | Fe I  | $3d^7(^4F)4p$      | $3d^7(^4F)4d$          | [2]       |
| 1054 | 544.567         | 59               | 544.58007             | Fe II | $3d^6(^5D)4d$      | $3d^6(^5D_3)4f$        | [1]       |
| 1055 | 544.59          | 62               | 544.58007             | Fe II | $3d^6(^5D)4d$      | $3d^6(^5D_3)4f$        | [1]       |
| 1056 | 544.693         | 6660             | 544.68743             | Fe I  | $3d^7(^4F)4s$      | $3d^6(^5D)4s4p(^3P^o)$ | [2]       |
|      |                 |                  | 544.69164             | Fe I  | $3d^7(^4F)4s$      | $3d^6(^5D)4s4p(^3P^o)$ | [2]       |
| 1057 | 545.558         | 2925             | 545.54541             | Fe I  | $3d^7(^4F)4p$      | $3d^7(^4F)4d$          | [2]       |
|      |                 |                  | 545.56092             | Fe I  | $3d^7(^4F)4s$      | $3d^6(^5D)4s4p(^3P^o)$ | [2]       |
| 1058 | 548.129         | 68               | 548.12427             | Fe I  | $3d^7(^4F)4p$      | $3d^6(^5D)4s (^6D)4d$  | [2]       |
|      |                 |                  | 548.12714             | Fe II | $3d^6(^5D)4d$      | $3d^6(^5D_2)4f$        | [1]       |
|      |                 |                  | 548.14383             | Fe I  | $3d^7(^4F)4p$      | $3d^6(^5D)4s (^4D)5s$  | [2]       |
| 1059 | 548.731         | 58               | 548.72047             | Fe II | $3d^6(^3H)4d$      | $3d^6(^3H_6)4f$        | [1]       |
|      |                 |                  | 548.73945             | Fe II | $3d^6(^5D)4d$      | $3d^6(^5D_3)4f$        | [1]       |

| No.  | Wavelength (nm) | Intensity (a.u.) | Wavelength (nm), Ref. | Type  | Lower energy level     | Higher energy level      | Reference |
|------|-----------------|------------------|-----------------------|-------|------------------------|--------------------------|-----------|
|      |                 |                  | 548.73948             | Fe I  | $3d^6(^5D)4s4p(^1P^o)$ | $3d^7(^4F)4d$            | [2]       |
| 1060 | 549.436         | 163              | 549.4462              | Fe I  | $3d^6(^3H)4d$          | $3d^6(^3H_6)4f$          | [2]       |
|      |                 |                  | 549.4462              | Fe II | $3d^8$                 | $3d^6(^3G)4s4p(^3P^o)$   | [2]       |
| 1061 | 550.423         | 73               | 550.4122              | Fe II | $3d^6(^3H)4d$          | $3d^6(^3P_2)4f$          | [1]       |
|      |                 |                  | 550.4362              | Fe I  | $3d^7(^2H)4s$          | $3d^6(^3H)4s4p(^3P^o)$   | [2]       |
| 1062 | 550.673         | 359              | 550.67165             | Fe II | $3d^6(^5D)5p$          | $3d^6(^3G)4d$            | [1]       |
|      |                 |                  | 550.67788             | Fe I  | $3d^7(^4F)4s$          | $3d^6(^5D)4s4p(^3P^o)$   | [2]       |
| 1063 | 550.855         | 76               | 550.8408              | Fe I  | $3d^6(^5D)4s4p(^1P^o)$ | $3d^64s(^4D)4d$          | [2]       |
|      |                 |                  | 550.8544              | Fe II | $3d^5(^4G)4s4p(^3P^o)$ | $3d^6(^3G)4d$            | [1]       |
| 1064 | 550.945         | 74               | 550.9381              | Fe II | $3d^5(^4G)4s4p(^3P^o)$ | $3d^6(^3G)4d$            | [1]       |
|      |                 |                  | 550.9442              | Fe II | $3d^6(^3F_1)4s$        | $3d^6(^1G_2)4p$          | [1]       |
| 1065 | 552.907         | 52               | 552.90523             | Fe II | $3d^6(^5D)4d$          | $3d^6(^5D_4)4f$          | [1]       |
|      |                 |                  | 552.91598             | Fe I  | $3d^64s^2$             | $3d^7(^2G)4p$            | [2]       |
| 1066 | 553.858         | 110              | 553.8516              | Fe I  | $3d^64s^2$             | $3d^6(^3G)4s4p(^3P^o)$   | [2]       |
|      |                 |                  | 553.8516              | Fe I  | $3d^7(^4F)4p$          | $3d^6(^5D)4s(^6D)4d$     | [2]       |
| 1067 | 556.336         | 91               | 556.32955             | Fe II | $3d^6(^3F_1)4p$        | $3d^6(^3G)4d$            | [1]       |
|      |                 |                  | 556.33876             | Fe II | $3d^6(^5D)4d$          | $3d^6(^5D_2)4f$          | [1]       |
| 1068 | 556.359         | 95               | 556.35999             | Fe I  | $3d^7(^4F)4p$          | $3d^6(^5D)4s(^4D)5s$     | [2]       |
|      |                 |                  | 556.36946             | Fe I  | $3d^64s^2$             | $3d^7(^4F)4p$            | [2]       |
| 1069 | 556.382         | 78               | 556.36946             | Fe I  | $3d^64s^2$             | $3d^7(^4F)4p$            | [2]       |
| 1070 | 559.464         | 51               | 559.4561              | Fe II | $3d^6(^5D)4d$          | $3d^6(^5D_3)4f$          | [1]       |
|      |                 |                  | 559.46549             | Fe I  | $3d^7(^4F)4p$          | $3d^7(^4F)4d$            | [2]       |
| 1071 | 560.021         | 54               | 560.0099              | Fe I  | $3d^8$                 | $3d^7(^4F_{9/2})4f$      | [2]       |
|      |                 |                  | 560.02238             | Fe I  | $3d^6(^5D)4s4p(^3P^o)$ | $3d^6(^5D)4s(^4D)5s$     | [2]       |
| 1072 | 564.138         | 66               | 564.14336             | Fe I  | $3d^7(^4F)4p$          | $3d^6(^5D)4s(^4D)5s$     | [2]       |
|      |                 |                  | 564.14909             | Fe I  | $3d^64s^2$             | $3d^6(^3F_2)4s4p(^3P^o)$ | [2]       |
| 1073 | 565.553         | 105              | 565.549               | Fe I  | $3d^6(^5D)4s4p(^1P^o)$ | $3d^6(^5D)4s(^4D)4d$     | [2]       |
|      |                 |                  | 565.549               | Fe I  | $3d^6(^5D)4s4p(^3P^o)$ | $3d^6(^5D)4s(^4D)5s$     | [2]       |
| 1074 | 565.949         | 62               | 565.95743             | Fe I  | $3d^6(^5D)4s4p(^1P^o)$ | $3d^64s(^4D)4d$          | [2]       |
| 1075 | 565.972         | 53               | 565.95743             | Fe I  | $3d^6(^5D)4s4p(^1P^o)$ | $3d^64s(^4D)4d$          | [2]       |
| 1076 | 566.741         | 219              | 566.746               | Fe I  | $3d^6(^5D)4s4p(^1P^o)$ | $3d^64s(^4D)4d$          | [2]       |
|      |                 |                  | 566.75176             | Fe I  | $3d^7(^4F)4p$          | $3d^6(^5D)4s(^6D)4d$     | [2]       |
| 1077 | 569.847         | 58               | 569.83645             | Fe I  | $3d^64s^2$             | $3d^7(^2P)4p$            | [2]       |
|      |                 |                  | 569.8562              | Fe II | $3d^6(^5D)5p$          | $3d^6(^3G)4d$            | [1]       |
| 1078 | 572.113         | 55               | 572.10312             | Fe II | $3d^6(^5D)5p$          | $3d^6(^3G)4d$            | [1]       |



| No.  | Wavelength (nm) | Intensity (a.u.) | Wavelength (nm), Ref. | Type  | Lower energy level     | Higher energy level    | Reference |
|------|-----------------|------------------|-----------------------|-------|------------------------|------------------------|-----------|
|      |                 |                  | 572.1122              | Fe II | $3d^6(^5D)5p$          | $3d^54s(^7S)5s$        | [1]       |
| 1079 | 572.169         | 202              | 572.1707              | Fe I  | $3d^7(^4F)4p$          | $3d^6(^5D)4s(^6D)4d$   | [2]       |
|      |                 |                  | 572.1707              | Fe I  | $3d^7(^4F)4p$          | $3d^6(^5D)4s(^6D)4d$   | [2]       |
| 1080 | 576.062         | 515              | 576.0531              | Fe I  | $3d^7(^4F)4p$          | $3d^6(^5D)4s(^6D)4d$   | [2]       |
|      |                 |                  | 576.0693              | Fe I  | $3d^7(^2H)4s$          | $3d^6(^3H)4s4p(^3P^o)$ | [2]       |
|      |                 |                  | 576.0693              | Fe I  | $3d^7(^4F)4p$          | $3d^6(^5D)4s(^6D)4d$   | [2]       |
| 1081 | 576.298         | 204              | 576.2838              | Fe I  | $3d^7(^4F)4p$          | $3d^6(^5D)4s(^4D)5s$   | [2]       |
|      |                 |                  | 576.29918             | Fe I  | $3d^6(^5D)4s4p(^3P^o)$ | $3d^6(^5D)4s(^4D)5s$   | [2]       |
| 1082 | 578.162         | 231              | 578.1494              | Fe I  | $3d^6(^5D)4s4p(^1P^o)$ | $3d^7(^4F)4d$          | [2]       |
|      |                 |                  | 578.1562              | Fe II | $3d^6(^3F2)4d$         | $3d^6(^3P2_2)4f$       | [1]       |
| 1083 | 580.672         | 85               | 580.6626              | Fe I  | $3d^6(^5D)4s4p(^1P^o)$ | $3d^64s(^6D)5d$        | [2]       |
|      |                 |                  | 580.67245             | Fe I  | $3d^7(^4F)4p$          | $3d^7(^4F)4d$          | [2]       |
| 1084 | 581.292         | 150              | 581.30485             | Fe II | $3d^6(^3F1)4s$         | $3d^6(^3F2)4p$         | [1]       |
| 1085 | 581.315         | 55               | 581.30485             | Fe II | $3d^6(^3F1)4s$         | $3d^6(^3F2)4p$         | [1]       |
| 1086 | 581.563         | 53               | 581.5514              | Fe I  | $3d^64s^2$             | $3d^6(^5D)4s(^6D)5p$   | [2]       |
|      |                 |                  | 581.5628              | Fe I  | $3d^6(^5D)4s4p(^1P^o)$ | $3d^64s(^6D)5d$        | [2]       |
| 1087 | 587.934         | 118              | 587.9487              | Fe I  | $3d^6(^5S)4s^24p$      | $3d^64s(^6D)5d$        | [2]       |
|      |                 |                  | 587.9487              | Fe I  | $3d^6(^5D)4s4p(^1P^o)$ | $3d^7(^4F)4d$          | [2]       |
| 1088 | 589.837         | 174              | 589.851               | Fe I  | $3d^6(^5S)4s^24p$      | $3d^64s(^6D)5d$        | [2]       |
|      |                 |                  | 589.851               | Fe I  | $3d^6(^5D)4s4p(^1P^o)$ | $3d^7(^4F)6s$          | [2]       |
| 1089 | 591.414         | 128              | 591.41117             | Fe I  | $3d^7(^4F)4p$          | $3d^7(^4F)4d$          | [2]       |
|      |                 |                  | 591.42009             | Fe I  | $3d^7(^4F)4p$          | $3d^7(^4F)4d$          | [2]       |
| 1090 | 591.615         | 60               | 591.604               | Fe I  | $3d^6(^5D)4s4p(^1P^o)$ | $3d^64s(^6D)5d$        | [2]       |
|      |                 |                  | 591.6247              | Fe I  | $3d^64s^2$             | $3d^7(^4F)4p$          | [2]       |
| 1091 | 593.023         | 124              | 593.01795             | Fe I  | $3d^7(^4F)4p$          | $3d^7(^4F)4d$          | [2]       |
|      |                 |                  | 593.03547             | Fe II | $3d^6(^3F1)4s$         | $3d^6(^3F2)4p$         | [1]       |
| 1092 | 595.275         | 110              | 595.2718              | Fe I  | $3d^6(^5D)4s4p(^3P^o)$ | $3d^7(^4F)5s$          | [2]       |
|      |                 |                  | 595.2885              | Fe I  | $3d^7(^4F)4p$          | $3d^6(^5D)4s(^6D)4d$   | [2]       |
| 1093 | 595.832         | 69               | 595.8228              | Fe I  | $3d^6(^5D)4s4p(^1P^o)$ | $3d^7(^4F)4d$          | [2]       |
|      |                 |                  | 595.8228              | Fe I  | $3d^7(^4F)4s$          | $3d^6(^5D)4s4p(^3P^o)$ | [2]       |
|      |                 |                  | 595.83328             | Fe I  | $3d^7(^4P)4s$          | $3d^7(^4F)4p$          | [2]       |
| 1094 | 596.166         | 3317             | 596.1524              | Fe I  | $3d^8$                 | $3d^6(^3D)4s4p(^3P^o)$ | [2]       |
|      |                 |                  | 596.17058             | Fe II | $3d^6(^5D)4d$          | $3d^6(^5D_4)4f$        | [1]       |
| 1095 | 599.78          | 61               | 599.76745             | Fe I  | $3d^6(^5D)4s4p(^1P^o)$ | $3d^7(^4F)6s$          | [2]       |
|      |                 |                  | 599.77773             | Fe II | $3d^6(^3F2)4d$         | $3d^6(^3H_4)4f$        | [1]       |
|      |                 |                  | 599.77774             | Fe I  | $3d^7(^4F)4p$          | $3d^7(^4F)4d$          | [2]       |

## References

- [1] G. Nave and S. Johansson, The Spectrum of Fe II, *Astrophys. J., Suppl. Ser.*, 2013, **204**: 1.
- [2] G. Nave, S. Johansson, R. C. M. Learner, A. P. Thorne, and J. W. Brault, A New Multiplet Table for Fe I, *Astrophys. J., Suppl. Ser.*, 1994, **94**, 221–459.
- [3] J.C. Pickering, S. Johansson, and P. L. Smith, The FERRUM Project: Branching Ratios and Atomic Transition Probabilities of Fe II Transitions from the  $3d^6(a^3F)4p$  Subconfiguration in the Visible to VUV Spectral Region, *Astron. Astrophys.*, 2001, **377**, 361–367.
- [4] H. M. Crosswhite, The Iron-Neon Hollow-Cathode Spectrum, *J. Res. Natl. Bur. Stand. (U.S.), Sect. A*, 1975, **79**, 17–69.
- [5] J. C. Dobbie, The Spectrum of Fe II, *Ann. Solar Phys. Obs. Cambridge*, 1938, **5**, Part 1, 1–58.
- [6] G. Nave, R. C. M. Learner, A. P. Thorne, and C. J. Harris, Precision Fe I and Fe II Wavelengths in the Ultraviolet Spectrum of the Iron-Neon Hollow-Cathode Lamp, *J. Opt. Soc. Am. B*, 1991, **8**, 2028–2041.
- [7] S. Johansson, T. Brage, D. S. Leckrone, G. Nave, and G. M. Wahlgren, Interpretation of Anomalous Ultraviolet Transitions of Fe II Observed in Laboratory Fourier Transform Spectra and Stellar HST and IUE Spectra, *Astrophys. J.*, 1995, **446**, 361–370.
- [8] H. Karlsson, C. M. Sikström, S. Johansson, Z. S. Li, and H. Lundberg, The FERRUM Project: Experimental f-Values for 4p-5s Transitions in Fe II, *Astron. Astrophys.*, 2001, **371**, 360–365.
