# Supplementary material for: Measurement of Fe emission spectrum from 170 nm to 600 nm with a coma-free spectrometer
Source: Royal Society of Chemistry journal article supplement (doi:10.1039/d3ja00342f), 2024-01-01
Supplement: d3ja00342f3.pdf [file d3ja00342f3.pdf]

ESI 3. The unassigned 1109 spectral lines of the Fe atom measured in the 170-600 nm wavelength region, not being able to compare to that shown in the reference..

| No. | Wavelength (nm) | Intensity (a.u.) |
|-----|-----------------|------------------|
| 1   | 170.03          | 59               |
| 2   | 170.066         | 34               |
| 3   | 171.257         | 88               |
| 4   | 171.738         | 146              |
| 5   | 172.713         | 130              |
| 6   | 172.869         | 31               |
| 7   | 174.626         | 22               |
| 8   | 174.662         | 28               |
| 9   | 174.855         | 108              |
| 10  | 175.011         | 157              |
| 11  | 175.312         | 29               |
| 12  | 175.517         | 62               |
| 13  | 175.926         | 28               |
| 14  | 177.033         | 17               |
| 15  | 177.514         | 31               |
| 16  | 177.55          | 40               |
| 17  | 178.044         | 153              |
| 18  | 178.08          | 70               |
| 19  | 178.477         | 44               |
| 20  | 180.005         | 36               |
| 21  | 180.498         | 28               |
| 22  | 181.714         | 95               |
| 23  | 181.786         | 24               |
| 24  | 182.111         | 28               |
| 25  | 182.315         | 49               |
| 26  | 182.34          | 28               |
| 27  | 182.424         | 54               |
| 28  | 182.556         | 74               |
| 29  | 182.761         | 84               |
| 30  | 183.784         | 43               |
| 31  | 183.844         | 21               |
| 32  | 185.059         | 56               |
| 33  | 187.959         | 24               |
| 34  | 188.308         | 23               |
| 35  | 188.849         | 32               |
| 36  | 189.247         | 125              |
| 37  | 189.475         | 49               |
| 38  | 190.666         | 16               |

| No. | Wavelength (nm) | Intensity (a.u.) |
|-----|-----------------|------------------|
| 39  | 191.052         | 18               |
| 40  | 191.413         | 40               |
| 41  | 192.078         | 61               |
| 42  | 192.986         | 29               |
| 43  | 193.172         | 40               |
| 44  | 193.568         | 37               |
| 45  | 193.814         | 156              |
| 46  | 193.913         | 48               |
| 47  | 194.82          | 178              |
| 48  | 195.197         | 47               |
| 49  | 195.731         | 50               |
| 50  | 195.901         | 42               |
| 51  | 196.046         | 21               |
| 52  | 196.142         | 30               |
| 53  | 196.588         | 55               |
| 54  | 196.684         | 34               |
| 55  | 196.768         | 62               |
| 56  | 196.828         | 38               |
| 57  | 196.971         | 96               |
| 58  | 197.735         | 30               |
| 59  | 198.02          | 41               |
| 60  | 198.481         | 20               |
| 61  | 198.693         | 20               |
| 62  | 198.717         | 93               |
| 63  | 199.608         | 37               |
| 64  | 200.214         | 20               |
| 65  | 202.941         | 19               |
| 66  | 203.796         | 22               |
| 67  | 204.265         | 29               |
| 68  | 205.196         | 24               |
| 69  | 205.582         | 21               |
| 70  | 206.031         | 95               |
| 71  | 206.141         | 48               |
| 72  | 206.468         | 26               |
| 73  | 206.663         | 34               |
| 74  | 206.848         | 24               |
| 75  | 207.118         | 40               |
| 76  | 208.469         | 159              |

| No. | Wavelength (nm) | Intensity (a.u.) |
|-----|-----------------|------------------|
| 77  | 208.682         | 26               |
| 78  | 209.789         | 25               |
| 79  | 211.674         | 19               |
| 80  | 211.991         | 23               |
| 81  | 212.042         | 39               |
| 82  | 212.489         | 32               |
| 83  | 213.114         | 29               |
| 84  | 217.843         | 50               |
| 85  | 220.47          | 38               |
| 86  | 221.253         | 28               |
| 87  | 223.217         | 41               |
| 88  | 223.338         | 25               |
| 89  | 223.687         | 33               |
| 90  | 223.711         | 36               |
| 91  | 226.374         | 27               |
| 92  | 226.531         | 27               |
| 93  | 231.422         | 83               |
| 94  | 234.204         | 41               |
| 95  | 244.899         | 34               |
| 96  | 248.581         | 39               |
| 97  | 255.312         | 29               |
| 98  | 257.523         | 26               |
| 99  | 261.628         | 28               |
| 100 | 262.195         | 50               |
| 101 | 262.797         | 50               |
| 102 | 264.34          | 27               |
| 103 | 268.713         | 43               |
| 104 | 274.852         | 24               |
| 105 | 279.831         | 164              |
| 106 | 280.108         | 214              |
| 107 | 280.91          | 47               |
| 108 | 282.968         | 63               |
| 109 | 285.993         | 32               |
| 110 | 290.7           | 65               |
| 111 | 294.174         | 25               |
| 112 | 294.413         | 36               |
| 113 | 295.176         | 29               |
| 114 | 297.419         | 39               |
| 115 | 298.301         | 145              |
| 116 | 299.362         | 49               |
| 117 | 301.448         | 35               |

| No. | Wavelength (nm) | Intensity (a.u.) |
|-----|-----------------|------------------|
| 118 | 302.3           | 33               |
| 119 | 304.852         | 36               |
| 120 | 308.213         | 101              |
| 121 | 310.452         | 31               |
| 122 | 310.476         | 40               |
| 123 | 310.869         | 136              |
| 124 | 311.845         | 52               |
| 125 | 313.618         | 24               |
| 126 | 315.14          | 138              |
| 127 | 317.066         | 24               |
| 128 | 321.284         | 34               |
| 129 | 322.103         | 133              |
| 130 | 323.871         | 26               |
| 131 | 324.679         | 44               |
| 132 | 325.13          | 91               |
| 133 | 325.213         | 38               |
| 134 | 325.331         | 36               |
| 135 | 325.64          | 47               |
| 136 | 325.853         | 52               |
| 137 | 325.96          | 71               |
| 138 | 326.269         | 24               |
| 139 | 326.387         | 31               |
| 140 | 326.625         | 49               |
| 141 | 327.016         | 79               |
| 142 | 327.396         | 22               |
| 143 | 328.487         | 40               |
| 144 | 328.997         | 39               |
| 145 | 329.151         | 59               |
| 146 | 329.281         | 31               |
| 147 | 329.708         | 39               |
| 148 | 329.863         | 48               |
| 149 | 329.91          | 33               |
| 150 | 329.993         | 29               |
| 151 | 330.1           | 47               |
| 152 | 330.23          | 30               |
| 153 | 331.333         | 26               |
| 154 | 331.665         | 35               |
| 155 | 331.807         | 39               |
| 156 | 331.89          | 40               |
| 157 | 332.151         | 87               |
| 158 | 332.519         | 31               |

| No. | Wavelength (nm) | Intensity (a.u.) |
|-----|-----------------|------------------|
| 159 | 332.649         | 27               |
| 160 | 333.017         | 38               |
| 161 | 333.218         | 23               |
| 162 | 333.882         | 26               |
| 163 | 334.273         | 24               |
| 164 | 334.747         | 61               |
| 165 | 334.878         | 142              |
| 166 | 335.008         | 42               |
| 167 | 335.091         | 38               |
| 168 | 335.221         | 41               |
| 169 | 335.814         | 61               |
| 170 | 337.473         | 28               |
| 171 | 337.627         | 44               |
| 172 | 338.599         | 30               |
| 173 | 339.096         | 47               |
| 174 | 340.174         | 32               |
| 175 | 340.388         | 112              |
| 176 | 340.53          | 55               |
| 177 | 340.625         | 43               |
| 178 | 340.909         | 22               |
| 179 | 342.093         | 32               |
| 180 | 342.141         | 43               |
| 181 | 342.307         | 43               |
| 182 | 343.053         | 170              |
| 183 | 343.432         | 35               |
| 184 | 343.562         | 58               |
| 185 | 344.32          | 60               |
| 186 | 344.651         | 37               |
| 187 | 345.551         | 33               |
| 188 | 346.088         | 54               |
| 189 | 346.147         | 57               |
| 190 | 346.195         | 33               |
| 191 | 346.254         | 30               |
| 192 | 348.42          | 194              |
| 193 | 348.444         | 57               |
| 194 | 348.633         | 35               |
| 195 | 348.894         | 150              |
| 196 | 349.308         | 43               |
| 197 | 349.592         | 75               |
| 198 | 349.876         | 38               |
| 199 | 349.958         | 66               |

| No. | Wavelength (nm) | Intensity (a.u.) |
|-----|-----------------|------------------|
| 200 | 350.254         | 57               |
| 201 | 350.301         | 41               |
| 202 | 350.431         | 33               |
| 203 | 350.597         | 41               |
| 204 | 350.798         | 40               |
| 205 | 351.247         | 40               |
| 206 | 351.59          | 50               |
| 207 | 351.72          | 402              |
| 208 | 351.779         | 42               |
| 209 | 351.815         | 42               |
| 210 | 352.843         | 92               |
| 211 | 353.21          | 39               |
| 212 | 353.623         | 109              |
| 213 | 353.895         | 60               |
| 214 | 354.403         | 39               |
| 215 | 354.509         | 87               |
| 216 | 354.781         | 39               |
| 217 | 355.265         | 60               |
| 218 | 355.903         | 39               |
| 219 | 356.198         | 39               |
| 220 | 357.284         | 36               |
| 221 | 357.579         | 50               |
| 222 | 357.709         | 150              |
| 223 | 357.957         | 40               |
| 224 | 358.334         | 52               |
| 225 | 358.417         | 92               |
| 226 | 358.818         | 72               |
| 227 | 359.915         | 41               |
| 228 | 360.469         | 38               |
| 229 | 361.105         | 51               |
| 230 | 361.577         | 33               |
| 231 | 362.685         | 90               |
| 232 | 362.967         | 44               |
| 233 | 364.063         | 440              |
| 234 | 364.31          | 44               |
| 235 | 364.334         | 74               |
| 236 | 364.616         | 39               |
| 237 | 365.311         | 32               |
| 238 | 365.346         | 39               |
| 239 | 365.841         | 30               |
| 240 | 366.594         | 32               |

| No. | Wavelength (nm) | Intensity (a.u.) |
|-----|-----------------|------------------|
| 241 | 368.521         | 46               |
| 242 | 368.875         | 38               |
| 243 | 369.099         | 70               |
| 244 | 369.146         | 31               |
| 245 | 369.488         | 262              |
| 246 | 370.607         | 82               |
| 247 | 370.83          | 120              |
| 248 | 371.019         | 64               |
| 249 | 371.089         | 41               |
| 250 | 371.525         | 62               |
| 251 | 372.314         | 108              |
| 252 | 372.973         | 188              |
| 253 | 373.984         | 97               |
| 254 | 376.829         | 31               |
| 255 | 377.205         | 31               |
| 256 | 377.276         | 25               |
| 257 | 377.57          | 27               |
| 258 | 378.169         | 29               |
| 259 | 378.544         | 39               |
| 260 | 379.707         | 27               |
| 261 | 380.786         | 29               |
| 262 | 380.845         | 28               |
| 263 | 381.678         | 39               |
| 264 | 382.358         | 126              |
| 265 | 383.015         | 49               |
| 266 | 383.179         | 86               |
| 267 | 383.366         | 139              |
| 268 | 383.601         | 40               |
| 269 | 383.659         | 48               |
| 270 | 383.812         | 35               |
| 271 | 383.882         | 45               |
| 272 | 384.234         | 76               |
| 273 | 384.445         | 91               |
| 274 | 384.855         | 67               |
| 275 | 385.042         | 58               |
| 276 | 385.382         | 40               |
| 277 | 385.698         | 81               |
| 278 | 385.85          | 94               |
| 279 | 386.061         | 258              |
| 280 | 386.19          | 48               |
| 281 | 386.249         | 47               |

| No. | Wavelength (nm) | Intensity (a.u.) |
|-----|-----------------|------------------|
| 282 | 386.342         | 53               |
| 283 | 386.869         | 29               |
| 284 | 387.021         | 44               |
| 285 | 387.63          | 36               |
| 286 | 388.04          | 32               |
| 287 | 388.356         | 91               |
| 288 | 388.402         | 61               |
| 289 | 388.777         | 44               |
| 290 | 389.022         | 69               |
| 291 | 389.139         | 60               |
| 292 | 389.443         | 34               |
| 293 | 389.479         | 113              |
| 294 | 389.642         | 82               |
| 295 | 390.085         | 32               |
| 296 | 390.191         | 227              |
| 297 | 391.225         | 30               |
| 298 | 391.554         | 28               |
| 299 | 391.636         | 38               |
| 300 | 393.386         | 75               |
| 301 | 393.703         | 51               |
| 302 | 393.926         | 33               |
| 303 | 393.949         | 73               |
| 304 | 394.407         | 85               |
| 305 | 394.783         | 71               |
| 306 | 394.935         | 149              |
| 307 | 395.087         | 44               |
| 308 | 395.158         | 304              |
| 309 | 395.217         | 84               |
| 310 | 395.428         | 37               |
| 311 | 395.838         | 49               |
| 312 | 396.002         | 126              |
| 313 | 396.061         | 51               |
| 314 | 396.155         | 272              |
| 315 | 396.272         | 84               |
| 316 | 396.471         | 26               |
| 317 | 397.092         | 39               |
| 318 | 397.256         | 36               |
| 319 | 397.327         | 46               |
| 320 | 397.456         | 33               |
| 321 | 397.877         | 167              |
| 322 | 397.936         | 42               |

| No. | Wavelength (nm) | Intensity (a.u.) |
|-----|-----------------|------------------|
| 323 | 398.229         | 39               |
| 324 | 398.463         | 50               |
| 325 | 398.65          | 136              |
| 326 | 399.47          | 35               |
| 327 | 399.786         | 147              |
| 328 | 400.874         | 37               |
| 329 | 401.681         | 51               |
| 330 | 401.95          | 165              |
| 331 | 402.301         | 55               |
| 332 | 402.5           | 36               |
| 333 | 402.722         | 28               |
| 334 | 402.815         | 25               |
| 335 | 403.072         | 4945             |
| 336 | 403.411         | 241              |
| 337 | 403.446         | 1932             |
| 338 | 403.528         | 27               |
| 339 | 403.575         | 39               |
| 340 | 403.855         | 51               |
| 341 | 404.872         | 38               |
| 342 | 405.549         | 44               |
| 343 | 405.595         | 70               |
| 344 | 405.899         | 28               |
| 345 | 406.214         | 43               |
| 346 | 406.599         | 73               |
| 347 | 407.031         | 56               |
| 348 | 407.416         | 57               |
| 349 | 407.532         | 37               |
| 350 | 407.882         | 40               |
| 351 | 408.29          | 35               |
| 352 | 408.768         | 47               |
| 353 | 408.897         | 32               |
| 354 | 409.06          | 188              |
| 355 | 409.13          | 24               |
| 356 | 409.188         | 181              |
| 357 | 409.293         | 27               |
| 358 | 409.561         | 32               |
| 359 | 409.922         | 27               |
| 360 | 410.004         | 99               |
| 361 | 411.469         | 109              |
| 362 | 411.633         | 28               |
| 363 | 411.738         | 29               |

| No. | Wavelength (nm) | Intensity (a.u.) |
|-----|-----------------|------------------|
| 364 | 412.743         | 228              |
| 365 | 413.607         | 71               |
| 366 | 413.794         | 48               |
| 367 | 414.063         | 37               |
| 368 | 414.144         | 30               |
| 369 | 414.635         | 25               |
| 370 | 414.961         | 50               |
| 371 | 415.113         | 48               |
| 372 | 415.918         | 38               |
| 373 | 416.035         | 28               |
| 374 | 416.257         | 25               |
| 375 | 417.05          | 45               |
| 376 | 417.131         | 70               |
| 377 | 417.726         | 68               |
| 378 | 417.936         | 42               |
| 379 | 417.959         | 23               |
| 380 | 418.367         | 29               |
| 381 | 418.402         | 37               |
| 382 | 418.647         | 27               |
| 383 | 419.276         | 23               |
| 384 | 419.579         | 28               |
| 385 | 420.022         | 34               |
| 386 | 420.464         | 35               |
| 387 | 420.534         | 29               |
| 388 | 420.581         | 40               |
| 389 | 421.268         | 22               |
| 390 | 421.489         | 60               |
| 391 | 422.071         | 54               |
| 392 | 422.35          | 176              |
| 393 | 422.699         | 79               |
| 394 | 423.095         | 23               |
| 395 | 423.467         | 24               |
| 396 | 424.409         | 27               |
| 397 | 424.572         | 24               |
| 398 | 425.432         | 118              |
| 399 | 426.164         | 45               |
| 400 | 428.08          | 61               |
| 401 | 428.185         | 26               |
| 402 | 428.475         | 31               |
| 403 | 428.626         | 25               |
| 404 | 428.916         | 110              |

| No. | Wavelength (nm) | Intensity (a.u.) |
|-----|-----------------|------------------|
| 405 | 429.508         | 26               |
| 406 | 430.424         | 30               |
| 407 | 430.598         | 102              |
| 408 | 430.702         | 35               |
| 409 | 431.201         | 23               |
| 410 | 431.363         | 29               |
| 411 | 432.082         | 95               |
| 412 | 432.186         | 45               |
| 413 | 432.221         | 40               |
| 414 | 432.384         | 44               |
| 415 | 432.628         | 432              |
| 416 | 432.86          | 36               |
| 417 | 432.895         | 46               |
| 418 | 433.15          | 35               |
| 419 | 433.208         | 39               |
| 420 | 433.243         | 31               |
| 421 | 433.359         | 44               |
| 422 | 433.441         | 36               |
| 423 | 433.684         | 79               |
| 424 | 434.114         | 37               |
| 425 | 434.671         | 50               |
| 426 | 434.868         | 218              |
| 427 | 434.984         | 34               |
| 428 | 435.065         | 34               |
| 429 | 435.692         | 64               |
| 430 | 436.121         | 96               |
| 431 | 436.828         | 48               |
| 432 | 437.025         | 73               |
| 433 | 437.164         | 44               |
| 434 | 437.257         | 48               |
| 435 | 437.871         | 38               |
| 436 | 438.74          | 65               |
| 437 | 438.879         | 51               |
| 438 | 438.902         | 69               |
| 439 | 439.284         | 177              |
| 440 | 439.342         | 44               |
| 441 | 439.654         | 75               |
| 442 | 439.851         | 34               |
| 443 | 440.059         | 45               |
| 444 | 440.372         | 48               |
| 445 | 441.39          | 41               |

| No. | Wavelength (nm) | Intensity (a.u.) |
|-----|-----------------|------------------|
| 446 | 443.286         | 127              |
| 447 | 443.771         | 35               |
| 448 | 444.418         | 93               |
| 449 | 444.464         | 38               |
| 450 | 444.799         | 129              |
| 451 | 445.122         | 45               |
| 452 | 445.85          | 48               |
| 453 | 445.873         | 50               |
| 454 | 446.034         | 82               |
| 455 | 446.715         | 65               |
| 456 | 447.061         | 46               |
| 457 | 447.2           | 42               |
| 458 | 447.373         | 43               |
| 459 | 447.938         | 193              |
| 460 | 448.676         | 41               |
| 461 | 448.722         | 52               |
| 462 | 449.39          | 133              |
| 463 | 449.759         | 194              |
| 464 | 449.805         | 54               |
| 465 | 449.828         | 73               |
| 466 | 449.943         | 49               |
| 467 | 450.22          | 48               |
| 468 | 450.3           | 61               |
| 469 | 450.427         | 208              |
| 470 | 450.692         | 73               |
| 471 | 450.899         | 42               |
| 472 | 451.567         | 53               |
| 473 | 451.808         | 184              |
| 474 | 452.108         | 72               |
| 475 | 452.464         | 63               |
| 476 | 452.706         | 91               |
| 477 | 452.821         | 153              |
| 478 | 453.027         | 66               |
| 479 | 453.131         | 109              |
| 480 | 453.212         | 48               |
| 481 | 453.316         | 65               |
| 482 | 453.339         | 78               |
| 483 | 453.846         | 51               |
| 484 | 454.389         | 115              |
| 485 | 454.515         | 283              |
| 486 | 454.746         | 61               |

| No. | Wavelength (nm) | Intensity (a.u.) |
|-----|-----------------|------------------|
| 487 | 455.092         | 57               |
| 488 | 455.23          | 52               |
| 489 | 455.369         | 52               |
| 490 | 455.392         | 82               |
| 491 | 455.426         | 49               |
| 492 | 455.738         | 102              |
| 493 | 455.864         | 70               |
| 494 | 456.164         | 57               |
| 495 | 457.212         | 78               |
| 496 | 457.489         | 44               |
| 497 | 457.604         | 80               |
| 498 | 457.673         | 58               |
| 499 | 457.696         | 46               |
| 500 | 457.719         | 48               |
| 501 | 457.88          | 92               |
| 502 | 457.984         | 53               |
| 503 | 458.168         | 60               |
| 504 | 458.444         | 65               |
| 505 | 458.732         | 63               |
| 506 | 458.882         | 65               |
| 507 | 458.928         | 112              |
| 508 | 459.135         | 71               |
| 509 | 459.192         | 94               |
| 510 | 459.307         | 81               |
| 511 | 459.399         | 64               |
| 512 | 459.756         | 109              |
| 513 | 459.917         | 50               |
| 514 | 460.078         | 54               |
| 515 | 460.274         | 82               |
| 516 | 460.618         | 54               |
| 517 | 461.044         | 62               |
| 518 | 461.182         | 98               |
| 519 | 461.492         | 85               |
| 520 | 462.124         | 51               |
| 521 | 462.377         | 68               |
| 522 | 462.538         | 65               |
| 523 | 462.63          | 48               |
| 524 | 462.676         | 85               |
| 525 | 462.905         | 67               |
| 526 | 462.951         | 50               |
| 527 | 463.077         | 53               |

| No. | Wavelength (nm) | Intensity (a.u.) |
|-----|-----------------|------------------|
| 528 | 463.135         | 52               |
| 529 | 463.25          | 54               |
| 530 | 463.433         | 52               |
| 531 | 463.766         | 85               |
| 532 | 463.858         | 85               |
| 533 | 463.881         | 50               |
| 534 | 463.939         | 82               |
| 535 | 464.248         | 54               |
| 536 | 464.363         | 74               |
| 537 | 464.558         | 62               |
| 538 | 464.627         | 76               |
| 539 | 464.868         | 65               |
| 540 | 465.258         | 68               |
| 541 | 465.74          | 97               |
| 542 | 465.969         | 62               |
| 543 | 466.692         | 57               |
| 544 | 466.829         | 134              |
| 545 | 466.898         | 54               |
| 546 | 467.104         | 67               |
| 547 | 467.265         | 66               |
| 548 | 467.356         | 67               |
| 549 | 467.402         | 84               |
| 550 | 467.585         | 83               |
| 551 | 467.62          | 61               |
| 552 | 467.803         | 98               |
| 553 | 467.952         | 87               |
| 554 | 468.009         | 59               |
| 555 | 468.158         | 102              |
| 556 | 468.307         | 81               |
| 557 | 468.536         | 213              |
| 558 | 468.662         | 59               |
| 559 | 468.903         | 160              |
| 560 | 468.925         | 62               |
| 561 | 468.983         | 67               |
| 562 | 469.086         | 61               |
| 563 | 469.212         | 85               |
| 564 | 469.418         | 82               |
| 565 | 469.578         | 58               |
| 566 | 469.67          | 57               |
| 567 | 469.876         | 59               |
| 568 | 469.933         | 79               |

| No. | Wavelength (nm) | Intensity (a.u.) |
|-----|-----------------|------------------|
| 569 | 470.31          | 78               |
| 570 | 470.345         | 60               |
| 571 | 470.562         | 63               |
| 572 | 470.608         | 65               |
| 573 | 470.985         | 76               |
| 574 | 471.077         | 74               |
| 575 | 471.145         | 66               |
| 576 | 471.317         | 218              |
| 577 | 472.129         | 85               |
| 578 | 472.312         | 60               |
| 579 | 472.357         | 334              |
| 580 | 472.437         | 62               |
| 581 | 472.46          | 54               |
| 582 | 472.655         | 62               |
| 583 | 472.677         | 70               |
| 584 | 473.614         | 95               |
| 585 | 473.831         | 183              |
| 586 | 473.923         | 66               |
| 587 | 473.957         | 74               |
| 588 | 474.342         | 57               |
| 589 | 474.743         | 245              |
| 590 | 474.869         | 45               |
| 591 | 475.04          | 67               |
| 592 | 475.086         | 48               |
| 593 | 475.35          | 262              |
| 594 | 475.682         | 52               |
| 595 | 475.842         | 84               |
| 596 | 475.922         | 68               |
| 597 | 476.163         | 69               |
| 598 | 476.254         | 149              |
| 599 | 476.289         | 139              |
| 600 | 476.472         | 88               |
| 601 | 476.552         | 82               |
| 602 | 476.575         | 89               |
| 603 | 476.598         | 78               |
| 604 | 476.655         | 102              |
| 605 | 476.895         | 65               |
| 606 | 477.216         | 57               |
| 607 | 477.353         | 50               |
| 608 | 477.479         | 81               |
| 609 | 477.731         | 56               |

| No. | Wavelength (nm) | Intensity (a.u.) |
|-----|-----------------|------------------|
| 610 | 477.822         | 91               |
| 611 | 477.891         | 62               |
| 612 | 477.914         | 77               |
| 613 | 477.959         | 45               |
| 614 | 478.051         | 57               |
| 615 | 478.257         | 53               |
| 616 | 478.348         | 374              |
| 617 | 478.382         | 77               |
| 618 | 478.428         | 80               |
| 619 | 479.446         | 63               |
| 620 | 479.48          | 54               |
| 621 | 479.526         | 66               |
| 622 | 479.811         | 53               |
| 623 | 479.914         | 97               |
| 624 | 479.994         | 53               |
| 625 | 480.028         | 52               |
| 626 | 480.52          | 106              |
| 627 | 480.737         | 53               |
| 628 | 480.885         | 68               |
| 629 | 481.456         | 97               |
| 630 | 481.479         | 65               |
| 631 | 481.65          | 59               |
| 632 | 481.719         | 69               |
| 633 | 482.038         | 60               |
| 634 | 482.358         | 179              |
| 635 | 482.472         | 74               |
| 636 | 482.529         | 81               |
| 637 | 482.575         | 64               |
| 638 | 482.86          | 56               |
| 639 | 482.974         | 56               |
| 640 | 483.145         | 60               |
| 641 | 483.168         | 58               |
| 642 | 483.248         | 74               |
| 643 | 483.339         | 72               |
| 644 | 483.373         | 59               |
| 645 | 483.419         | 63               |
| 646 | 484.217         | 60               |
| 647 | 484.365         | 59               |
| 648 | 484.468         | 90               |
| 649 | 484.764         | 54               |
| 650 | 484.844         | 56               |

| No. | Wavelength (nm) | Intensity (a.u.) |
|-----|-----------------|------------------|
| 651 | 485.026         | 81               |
| 652 | 485.083         | 56               |
| 653 | 485.311         | 64               |
| 654 | 485.414         | 56               |
| 655 | 485.687         | 58               |
| 656 | 485.847         | 77               |
| 657 | 485.938         | 88               |
| 658 | 486.018         | 71               |
| 659 | 486.234         | 110              |
| 660 | 486.405         | 83               |
| 661 | 486.803         | 70               |
| 662 | 487.486         | 55               |
| 663 | 487.646         | 179              |
| 664 | 487.68          | 71               |
| 665 | 487.782         | 61               |
| 666 | 487.93          | 63               |
| 667 | 487.976         | 63               |
| 668 | 488.124         | 111              |
| 669 | 488.692         | 269              |
| 670 | 488.783         | 74               |
| 671 | 488.954         | 63               |
| 672 | 488.999         | 54               |
| 673 | 489.431         | 73               |
| 674 | 489.557         | 79               |
| 675 | 489.625         | 93               |
| 676 | 489.704         | 61               |
| 677 | 489.954         | 65               |
| 678 | 490.045         | 64               |
| 679 | 490.182         | 84               |
| 680 | 490.386         | 64               |
| 681 | 490.432         | 63               |
| 682 | 491.125         | 69               |
| 683 | 491.454         | 53               |
| 684 | 491.556         | 84               |
| 685 | 491.965         | 88               |
| 686 | 492.249         | 66               |
| 687 | 492.283         | 69               |
| 688 | 492.771         | 129              |
| 689 | 493.009         | 102              |
| 690 | 493.248         | 75               |
| 691 | 494.008         | 64               |

| No. | Wavelength (nm) | Intensity (a.u.) |
|-----|-----------------|------------------|
| 692 | 494.053         | 81               |
| 693 | 494.144         | 81               |
| 694 | 494.756         | 90               |
| 695 | 495.028         | 61               |
| 696 | 495.063         | 54               |
| 697 | 495.19          | 44               |
| 698 | 495.237         | 49               |
| 699 | 495.445         | 46               |
| 700 | 495.608         | 54               |
| 701 | 496.025         | 63               |
| 702 | 496.152         | 174              |
| 703 | 496.372         | 84               |
| 704 | 496.708         | 94               |
| 705 | 496.905         | 41               |
| 706 | 496.963         | 43               |
| 707 | 497.241         | 45               |
| 708 | 497.276         | 50               |
| 709 | 497.843         | 72               |
| 710 | 498.167         | 54               |
| 711 | 498.433         | 55               |
| 712 | 498.931         | 59               |
| 713 | 498.966         | 57               |
| 714 | 499.104         | 82               |
| 715 | 499.671         | 62               |
| 716 | 499.833         | 83               |
| 717 | 499.868         | 51               |
| 718 | 499.949         | 63               |
| 719 | 499.972         | 53               |
| 720 | 500.064         | 124              |
| 721 | 500.11          | 100              |
| 722 | 501.324         | 183              |
| 723 | 501.416         | 81               |
| 724 | 501.694         | 63               |
| 725 | 501.728         | 60               |
| 726 | 502.664         | 186              |
| 727 | 502.929         | 67               |
| 728 | 503.218         | 64               |
| 729 | 503.841         | 50               |
| 730 | 503.991         | 53               |
| 731 | 504.452         | 59               |
| 732 | 504.533         | 47               |

| No. | Wavelength (nm) | Intensity (a.u.) |
|-----|-----------------|------------------|
| 733 | 504.706         | 61               |
| 734 | 504.89          | 52               |
| 735 | 505.028         | 58               |
| 736 | 505.075         | 67               |
| 737 | 505.317         | 70               |
| 738 | 505.363         | 48               |
| 739 | 505.962         | 52               |
| 740 | 506.146         | 49               |
| 741 | 506.354         | 49               |
| 742 | 506.4           | 58               |
| 743 | 506.814         | 51               |
| 744 | 507.114         | 59               |
| 745 | 507.356         | 58               |
| 746 | 507.505         | 64               |
| 747 | 508.483         | 53               |
| 748 | 508.76          | 83               |
| 749 | 509.174         | 48               |
| 750 | 509.266         | 54               |
| 751 | 509.473         | 118              |
| 752 | 509.519         | 64               |
| 753 | 509.576         | 60               |
| 754 | 509.622         | 98               |
| 755 | 509.806         | 60               |
| 756 | 510.312         | 46               |
| 757 | 510.346         | 180              |
| 758 | 511.151         | 83               |
| 759 | 511.197         | 57               |
| 760 | 511.909         | 62               |
| 761 | 512.093         | 73               |
| 762 | 512.919         | 296              |
| 763 | 512.942         | 78               |
| 764 | 513.034         | 57               |
| 765 | 513.562         | 93               |
| 766 | 513.837         | 74               |
| 767 | 514.72          | 68               |
| 768 | 515.339         | 68               |
| 769 | 515.545         | 60               |
| 770 | 516.431         | 48               |
| 771 | 516.961         | 60               |
| 772 | 517.26          | 50               |
| 773 | 517.375         | 61               |

| No. | Wavelength (nm) | Intensity (a.u.) |
|-----|-----------------|------------------|
| 774 | 517.444         | 51               |
| 775 | 517.559         | 51               |
| 776 | 517.605         | 52               |
| 777 | 518.008         | 79               |
| 778 | 518.089         | 90               |
| 779 | 518.537         | 56               |
| 780 | 519.825         | 62               |
| 781 | 519.894         | 56               |
| 782 | 520.284         | 207              |
| 783 | 521.1           | 141              |
| 784 | 521.123         | 124              |
| 785 | 522.018         | 45               |
| 786 | 522.075         | 63               |
| 787 | 522.202         | 118              |
| 788 | 522.5           | 58               |
| 789 | 523.085         | 46               |
| 790 | 523.234         | 115              |
| 791 | 523.888         | 56               |
| 792 | 524.335         | 55               |
| 793 | 525.48          | 224              |
| 794 | 525.629         | 64               |
| 795 | 525.869         | 64               |
| 796 | 526.098         | 58               |
| 797 | 526.19          | 61               |
| 798 | 526.27          | 52               |
| 799 | 527.094         | 59               |
| 800 | 527.128         | 57               |
| 801 | 527.163         | 72               |
| 802 | 527.266         | 54               |
| 803 | 527.655         | 61               |
| 804 | 528.146         | 92               |
| 805 | 528.832         | 54               |
| 806 | 528.924         | 80               |
| 807 | 529.506         | 63               |
| 808 | 530.078         | 110              |
| 809 | 530.409         | 53               |
| 810 | 530.854         | 70               |
| 811 | 531.733         | 51               |
| 812 | 531.972         | 57               |
| 813 | 532.349         | 60               |
| 814 | 532.463         | 103              |

| No. | Wavelength (nm) | Intensity (a.u.) |
|-----|-----------------|------------------|
| 815 | 532.736         | 128              |
| 816 | 533.17          | 58               |
| 817 | 533.511         | 68               |
| 818 | 533.603         | 66               |
| 819 | 533.751         | 55               |
| 820 | 534.058         | 125              |
| 821 | 534.172         | 116              |
| 822 | 534.207         | 244              |
| 823 | 534.377         | 207              |
| 824 | 534.537         | 61               |
| 825 | 534.628         | 123              |
| 826 | 534.765         | 72               |
| 827 | 534.81          | 58               |
| 828 | 534.844         | 56               |
| 829 | 535.459         | 277              |
| 830 | 536.654         | 505              |
| 831 | 536.824         | 53               |
| 832 | 536.859         | 61               |
| 833 | 537.545         | 47               |
| 834 | 538.026         | 54               |
| 835 | 538.106         | 43               |
| 836 | 538.22          | 49               |
| 837 | 538.426         | 64               |
| 838 | 538.769         | 50               |
| 839 | 539.467         | 63               |
| 840 | 540.107         | 92               |
| 841 | 540.164         | 58               |
| 842 | 540.335         | 65               |
| 843 | 540.929         | 56               |
| 844 | 541.169         | 101              |
| 845 | 541.363         | 99               |
| 846 | 541.58          | 115              |
| 847 | 541.602         | 96               |
| 848 | 541.637         | 81               |
| 849 | 541.682         | 80               |
| 850 | 541.785         | 131              |
| 851 | 541.899         | 85               |
| 852 | 541.956         | 93               |
| 853 | 541.991         | 96               |
| 854 | 542.082         | 91               |
| 855 | 542.15          | 118              |

| No. | Wavelength (nm) | Intensity (a.u.) |
|-----|-----------------|------------------|
| 856 | 542.23          | 402              |
| 857 | 542.493         | 92               |
| 858 | 542.607         | 87               |
| 859 | 543.097         | 92               |
| 860 | 543.257         | 90               |
| 861 | 543.587         | 54               |
| 862 | 543.849         | 52               |
| 863 | 544.385         | 105              |
| 864 | 544.829         | 225              |
| 865 | 544.932         | 50               |
| 866 | 545.034         | 224              |
| 867 | 545.114         | 90               |
| 868 | 545.33          | 185              |
| 869 | 545.422         | 75               |
| 870 | 545.456         | 209              |
| 871 | 545.843         | 103              |
| 872 | 545.866         | 218              |
| 873 | 546.025         | 53               |
| 874 | 546.116         | 67               |
| 875 | 546.241         | 111              |
| 876 | 546.366         | 58               |
| 877 | 546.514         | 85               |
| 878 | 546.742         | 47               |
| 879 | 546.901         | 54               |
| 880 | 548.334         | 75               |
| 881 | 548.425         | 48               |
| 882 | 548.481         | 95               |
| 883 | 549.413         | 100              |
| 884 | 549.606         | 57               |
| 885 | 550.015         | 70               |
| 886 | 550.083         | 79               |
| 887 | 550.219         | 79               |
| 888 | 550.798         | 87               |
| 889 | 550.821         | 81               |
| 890 | 550.9           | 83               |
| 891 | 551.479         | 82               |
| 892 | 551.615         | 187              |
| 893 | 551.83          | 115              |
| 894 | 551.875         | 66               |
| 895 | 552.046         | 67               |
| 896 | 552.125         | 68               |

## ARTICLE

## Journal Name

| No. | Wavelength (nm) | Intensity (a.u.) |
|-----|-----------------|------------------|
| 897 | 552.227         | 61               |
| 898 | 552.352         | 74               |
| 899 | 552.476         | 68               |
| 900 | 552.635         | 75               |
| 901 | 552.669         | 80               |
| 902 | 552.782         | 88               |
| 903 | 552.839         | 73               |
| 904 | 552.941         | 70               |
| 905 | 553.054         | 57               |
| 906 | 553.258         | 62               |
| 907 | 553.417         | 61               |
| 908 | 553.587         | 65               |
| 909 | 553.723         | 93               |
| 910 | 553.745         | 78               |
| 911 | 554.187         | 57               |
| 912 | 554.266         | 128              |
| 913 | 554.368         | 74               |
| 914 | 554.515         | 63               |
| 915 | 554.73          | 73               |
| 916 | 554.877         | 103              |
| 917 | 554.979         | 101              |
| 918 | 555.013         | 60               |
| 919 | 555.07          | 58               |
| 920 | 555.115         | 67               |
| 921 | 555.319         | 65               |
| 922 | 555.454         | 96               |
| 923 | 555.511         | 91               |
| 924 | 555.76          | 60               |
| 925 | 555.862         | 66               |
| 926 | 556.653         | 54               |
| 927 | 556.698         | 55               |
| 928 | 556.823         | 48               |
| 929 | 557.105         | 91               |
| 930 | 557.173         | 62               |
| 931 | 557.207         | 71               |
| 932 | 557.229         | 77               |
| 933 | 557.388         | 50               |
| 934 | 557.433         | 70               |
| 935 | 557.478         | 53               |
| 936 | 557.749         | 210              |
| 937 | 557.851         | 59               |

| No. | Wavelength (nm) | Intensity (a.u.) |
|-----|-----------------|------------------|
| 938 | 558.225         | 62               |
| 939 | 558.532         | 79               |
| 940 | 558.873         | 49               |
| 941 | 559.043         | 54               |
| 942 | 559.271         | 205              |
| 943 | 559.293         | 49               |
| 944 | 559.384         | 49               |
| 945 | 559.498         | 42               |
| 946 | 559.623         | 57               |
| 947 | 559.702         | 42               |
| 948 | 559.725         | 67               |
| 949 | 559.827         | 78               |
| 950 | 559.861         | 111              |
| 951 | 559.918         | 55               |
| 952 | 560.497         | 69               |
| 953 | 560.952         | 46               |
| 954 | 560.986         | 52               |
| 955 | 561.02          | 58               |
| 956 | 561.247         | 59               |
| 957 | 561.292         | 54               |
| 958 | 561.394         | 93               |
| 959 | 561.462         | 72               |
| 960 | 561.632         | 61               |
| 961 | 561.848         | 68               |
| 962 | 561.984         | 250              |
| 963 | 562.234         | 72               |
| 964 | 562.256         | 67               |
| 965 | 562.517         | 92               |
| 966 | 562.653         | 117              |
| 967 | 562.687         | 54               |
| 968 | 562.733         | 51               |
| 969 | 562.914         | 69               |
| 970 | 563.039         | 126              |
| 971 | 563.254         | 89               |
| 972 | 563.322         | 70               |
| 973 | 563.447         | 72               |
| 974 | 563.492         | 64               |
| 975 | 564.761         | 83               |
| 976 | 564.795         | 63               |
| 977 | 565.044         | 56               |
| 978 | 565.1           | 66               |

| No.  | Wavelength (nm) | Intensity (a.u.) |
|------|-----------------|------------------|
| 979  | 565.191         | 81               |
| 980  | 565.304         | 59               |
| 981  | 565.44          | 55               |
| 982  | 565.836         | 94               |
| 983  | 566.616         | 61               |
| 984  | 566.661         | 51               |
| 985  | 566.695         | 51               |
| 986  | 567.136         | 71               |
| 987  | 567.317         | 51               |
| 988  | 567.362         | 54               |
| 989  | 567.611         | 54               |
| 990  | 568.108         | 58               |
| 991  | 568.82          | 53               |
| 992  | 568.854         | 219              |
| 993  | 569.057         | 74               |
| 994  | 569.384         | 58               |
| 995  | 569.474         | 50               |
| 996  | 569.655         | 58               |
| 997  | 569.903         | 69               |
| 998  | 570.828         | 130              |
| 999  | 571.245         | 62               |
| 1000 | 571.572         | 58               |
| 1001 | 571.685         | 73               |
| 1002 | 572.057         | 64               |
| 1003 | 572.226         | 82               |
| 1004 | 572.316         | 85               |
| 1005 | 572.575         | 72               |
| 1006 | 572.71          | 62               |
| 1007 | 572.732         | 187              |
| 1008 | 572.789         | 58               |
| 1009 | 573.385         | 110              |
| 1010 | 573.993         | 60               |
| 1011 | 574.331         | 103              |
| 1012 | 574.432         | 60               |
| 1013 | 574.556         | 65               |
| 1014 | 574.634         | 91               |
| 1015 | 574.691         | 84               |
| 1016 | 575.59          | 310              |
| 1017 | 575.657         | 87               |
| 1018 | 575.702         | 104              |
| 1019 | 575.736         | 91               |

| No.  | Wavelength (nm) | Intensity (a.u.) |
|------|-----------------|------------------|
| 1020 | 575.849         | 58               |
| 1021 | 576.141         | 73               |
| 1022 | 576.904         | 198              |
| 1023 | 577.073         | 69               |
| 1024 | 577.185         | 58               |
| 1025 | 577.286         | 58               |
| 1026 | 577.432         | 61               |
| 1027 | 577.533         | 66               |
| 1028 | 578.263         | 53               |
| 1029 | 578.936         | 105              |
| 1030 | 578.969         | 57               |
| 1031 | 579.888         | 52               |
| 1032 | 580.154         | 43               |
| 1033 | 580.188         | 64               |
| 1034 | 580.515         | 51               |
| 1035 | 580.593         | 59               |
| 1036 | 581.213         | 70               |
| 1037 | 581.585         | 236              |
| 1038 | 581.777         | 52               |
| 1039 | 581.9           | 51               |
| 1040 | 582.486         | 60               |
| 1041 | 583.127         | 64               |
| 1042 | 583.172         | 213              |
| 1043 | 583.206         | 151              |
| 1044 | 583.229         | 117              |
| 1045 | 583.251         | 68               |
| 1046 | 583.274         | 83               |
| 1047 | 583.319         | 66               |
| 1048 | 583.375         | 97               |
| 1049 | 583.454         | 81               |
| 1050 | 583.701         | 51               |
| 1051 | 583.791         | 53               |
| 1052 | 583.881         | 71               |
| 1053 | 584.016         | 62               |
| 1054 | 584.454         | 144              |
| 1055 | 586.027         | 148              |
| 1056 | 586.274         | 90               |
| 1057 | 586.464         | 91               |
| 1058 | 586.487         | 78               |
| 1059 | 586.565         | 78               |
| 1060 | 586.678         | 143              |

## ARTICLE

## Journal Name

| No.  | Wavelength (nm) | Intensity (a.u.) |
|------|-----------------|------------------|
| 1061 | 586.992         | 58               |
| 1062 | 587.059         | 74               |
| 1063 | 587.149         | 64               |
| 1064 | 587.653         | 76               |
| 1065 | 587.687         | 126              |
| 1066 | 587.81          | 106              |
| 1067 | 587.911         | 105              |
| 1068 | 589.446         | 73               |
| 1069 | 589.636         | 83               |
| 1070 | 589.871         | 145              |
| 1071 | 590.072         | 85               |
| 1072 | 590.117         | 62               |
| 1073 | 590.442         | 59               |
| 1074 | 590.464         | 57               |
| 1075 | 590.755         | 75               |
| 1076 | 591.057         | 77               |
| 1077 | 591.09          | 57               |
| 1078 | 591.113         | 195              |
| 1079 | 591.18          | 131              |
| 1080 | 591.235         | 104              |
| 1081 | 591.303         | 107              |
| 1082 | 591.481         | 58               |
| 1083 | 591.683         | 66               |
| 1084 | 591.962         | 64               |
| 1085 | 592.085         | 71               |

| No.  | Wavelength (nm) | Intensity (a.u.) |
|------|-----------------|------------------|
| 1086 | 592.118         | 52               |
| 1087 | 592.196         | 51               |
| 1088 | 592.275         | 95               |
| 1089 | 592.397         | 52               |
| 1090 | 592.464         | 91               |
| 1091 | 592.732         | 55               |
| 1092 | 592.822         | 216              |
| 1093 | 593.079         | 58               |
| 1094 | 593.134         | 66               |
| 1095 | 593.291         | 204              |
| 1096 | 593.491         | 95               |
| 1097 | 593.614         | 188              |
| 1098 | 593.726         | 80               |
| 1099 | 593.782         | 63               |
| 1100 | 593.882         | 68               |
| 1101 | 595.32          | 86               |
| 1102 | 596.111         | 108              |
| 1103 | 598.425         | 223              |
| 1104 | 598.447         | 77               |
| 1105 | 598.88          | 82               |
| 1106 | 599.025         | 66               |
| 1107 | 599.069         | 67               |
| 1108 | 599.369         | 68               |
| 1109 | 599.869         | 67               |
